# Supplementary material
Source: publisher figshare collection journal article supplement (https://gsapubs.figshare.com/articles/dataset/_/21936018)
Supplement: Supplementary file 1 [file 1]

## Sheet: primitive arc magmas - filtered
Reference	Arc	Location	Location comment	Lat	Long	Sample name	Elevation	Crustal thickness	ROCK NAME	MIN. AGE (YRS.)	MAX. AGE (YRS.)	GEOL.	AGE	ERUPTION DAY	ERUPTION MONTH	ERUPTION YEAR	ROCK TEXTURE	ROCK TYPE	DRILL DEPTH MIN	DRILL DEPTHAX	ALTERATION	MINERAL	MATERIAL	SIO2(WT%)	TIO2(WT%)	AL2O3(WT%)	FEOT(WT%)	CAO(WT%)	MGO(WT%)	MNO(WT%)	K2O(WT%)	NA2O(WT%)	P2O5(WT%)	Total		H2O(WT%)	H2OP(WT%)	H2OM(WT%)	H2OT(WT%)	CO2(WT%)	CO1(WT%)	F(WT%)	CL(WT%)	CL2(WT%)	OH(WT%)	CH4(WT%)	SO2(WT%)	SO3(WT%)	SO4(WT%)
[23770]	Aegean Arc	AEGEAN ARC / SOUTH AEGEAN VOLCANIC ARC / POROS		37.52	23.48	s_IP50 [23770]	165	27.6853	DACITE [23770]				PLIOCENE [23770]					VOL					WR [23770]	53.7501	0.755155	17.3815	6.55744	10.3607	7.00539	0.13168	1.41927	2.49191	0.146882	100
[23770]	Aegean Arc	AEGEAN ARC / SOUTH AEGEAN VOLCANIC ARC / AEGINA	KOUTALOU, NW AEGINA	37.75	23.43	s_IA321 [23770]	20	26.5558	DACITE, BIOTITE-HORNBLENDE [23770]				PLIOCENE [23770]					VOL					WR [23770]	51.5611	0.963345	16.9298	7.21447	10.5379	7.07584	0.142398	2.08486	3.11625	0.374033	100
[19377]	Aegean Arc	AEGEAN ARC / SOUTH AEGEAN VOLCANIC ARC / SANTORINI	NEA KAMENI, 1925-1928 ERUPTIOS	36.4	25.45	s_KAM24 [19377]	143	27.514	BASALT [19377]				Quaternary					VOL					WR [19377]	52.1675	0.703336	19.2011	7.83279	9.52518	7.09365	0.160763	0.532526	2.73296	0.0502383	100
[21969]	Aegean Arc	AEGEAN ARC / WEST AEGEAN VOLCANIC ARC / METHANA PENINSULA / METHANA	METHANA PENINSULA	37.6182	23.3969	s_ME15-88 [21969]	169	27.7165	NOT GIVEN [21969]				Plio-Quaternary					VOL					WR [21969]	52.3438	0.777257	17.9304	6.87044	10.8969	7.10591	0.142506	1.10192	2.69109	0.139753	100
[10187]	Aegean Arc	AEGEAN ARC / SOUTH AEGEAN VOLCANIC ARC / NISYROS / NISYROS	LIES, AFIONAS	36.585	27.195	s_GZNIS12X [10187]	209	28.0281	BASALT [10187]				Plio-Quat					VOL					WR [10187]	47.1713	0.684518	15.301	6.00966	22.7904	7.54983	0.120797	0.0100664	0.271794	0.0905979	100
[23770]	Aegean Arc	AEGEAN ARC / SOUTH AEGEAN VOLCANIC ARC / AEGINA	SKOTINI, NW AEGINA	37.75	23.43	s_IA332 [23770]	20	26.5558	NOT GIVEN [23770]				PLIOCENE [23770]					VOL					WR [23770]	54.0412	0.766005	15.8648	7.22395	9.12577	7.63261	0.152615	2.17911	2.52854	0.485445	100
[19377]	Aegean Arc	AEGEAN ARC / SOUTH AEGEAN VOLCANIC ARC / SANTORINI	NEA KAMENI, 1925-1928 ERUPTIOS	36.4	25.45	s_KAM106B [19377]	143	27.514	BASALT [19377]				Quaternary					VOL					WR [19377]	51.3585	0.733118	18.5188	8.44053	9.51045	8.01409	0.180769	0.48205	2.70149	0.0602563	100
[6985]	Aegean Arc	AEGEAN ARC / SOUTH AEGEAN VOLCANIC ARC / SANTORINI	CAPE AKROTIRI	36.4	25.45	s_146 [6985]	143	27.514	NOT GIVEN [6985]				Plio-Quaternary					VOL					WR [6985]	54.3746	0.689931	15.6084	8.22918	8.50915	8.28917	0.139986	1.18988	2.85971	0.109989	100
[23770]	Aegean Arc	AEGEAN ARC / SOUTH AEGEAN VOLCANIC ARC / AEGINA	OROS	37.75	23.43	s_IA78 [23770]	20	26.5558	ANDESITE, HORNBLENDE [23770]				PLEISTOCENE [23770]					VOL					WR [23770]	52.0953	1.12819	15.1923	8.1652	10.1389	8.46542	0.117036	1.54886	2.56373	0.585134	100
[4994]	Aeolian Arc	AEOLIAN ARC / ITALY / VULCANO / LA FOSSA DI VULCANO		38.404	14.962	s_V147 [4994]	39	26.7038	TRACHYBASALT [4994]				Quaternary					VOL					WR [4994]	49.1691	0.811036	13.1793	9.9547	12.7738	8.82002	0.202759	2.23035	2.53449	0.324415	100			0.6
[9411]	Aleutian Arc	ALEUTIAN ARC / CENTRAL ALEUTIAN ARC / SEGUAM / SEGUAM	PYRE PEAK LAVA	52.32	-172.51	s_SEG 03 29 [9411]	818	32.7722	BASALT [9411]				Plio-Quaternary					VOL					WR [9411]	51.4072	0.648703	18.6228	8.82236	10.3992	7.02595	0.149701	0.429142	2.41517	0.0798403	100
[6565]	Aleutian Arc	ALEUTIAN ARC / SECOND ALEUTIAN ARC / UNALASKA / MAKUSHIN	MAKUSHIN VOLCANIC FIELD	53.67	-166.67	s_96PN08 [6565]	711	31.9387	NOT GIVEN [6565]				HISTORICAL [6565]					VOL					WR [6565]	50.9198	0.819836	16.8066	9.0182	11.2877	7.05859	0.179964	0.879824	2.86943	0.159968	100
[6992]	Aleutian Arc	ALEUTIAN ARC / ALASKA PENINSULA / UPPER ALASKA PENINSULA / KATMAI GROUP	KATMAI NATIONAL PARK, SADDLEHORN CLUSTER, FENNERS SADDLEHORN, S FACE OF COLUMNAR LAVA THAT CUTS OR BANKS AGAINST BASEMENT RIDGE	58.41	-155.26	s_2515 [6992]	547	30.6611	BASALT [6992]				Plio-Quaternary					VOL					WR [6992]	51.9028	0.672758	17.3311	8.46471	11.2562	7.12923	0.160659	0.522141	2.3898	0.1707	100
[6992]	Aleutian Arc	ALEUTIAN ARC / ALASKA PENINSULA / UPPER ALASKA PENINSULA / KATMAI GROUP	KATMAI NATIONAL PARK, SAVONOSKI CLUSTER, CONE 3110, BRECCIATED LAVA FLOW HIGH ON NW RIDGE OF CONE	58.58	-154.53	s_2594 [6992]	285	28.6201	BASALT [6992]				Plio-Quaternary					VOL					WR [6992]	51.6268	0.813416	17.0717	9.45973	10.5041	7.44125	0.170717	0.471982	2.21932	0.220928	100
[16078]	Aleutian Arc	ALEUTIAN ARC / CENTRAL ALEUTIAN ARC / TANAGA / UPPER SOUTH RIDGE	LOWERMOST LAVA IN UPPER SOUTH RIDGE SECTION, ABOVE YELLOW BEDS	51.865	-178.105	s_TAN-07-09 [16078]	513	30.3963	BASALT [16078]				Plio-Quaternary					VOL					WR [16078]	50.0675	0.880956	16.4992	9.77951	11.5694	7.51962	0.170991	0.811959	2.53987	0.160992	100
[16078]	Aleutian Arc	ALEUTIAN ARC / CENTRAL ALEUTIAN ARC / TANAGA	SOUTH RIDGE, 1 M THICK LOBE AT BASE OF SECTION	51.865	-178.105	s_TAN-07-05 [16078]	513	30.3963	BASALT [16078]				Plio-Quaternary					VOL					WR [16078]	48.2129	1.02106	17.031	10.3906	11.6907	7.61046	0.187011	1.07206	2.52015	0.264016	100
[16078]	Aleutian Arc	ALEUTIAN ARC / CENTRAL ALEUTIAN ARC / TANAGA / PRE-TANAGA VOLCANICS	SOLUMNAR JOINTED SITS, ON TOP OF OLD DEBRIS LAVA	51.865	-178.105	s_03TGGM111 [16078]	513	30.3963	BASALT [16078]				Plio-Quaternary					VOL					WR [16078]	46.6042	1.1491	17.1815	10.821	13.3812	7.71069	0.187017	0.730066	2.07019	0.165015	100
[6992]	Aleutian Arc	ALEUTIAN ARC / ALASKA PENINSULA / UPPER ALASKA PENINSULA / KATMAI GROUP	KATMAI NATIONAL PARK, SAVONOSKI CLUSTER, KNOB 1000	58.59	-154.56	s_1000 [6992]	370	29.2823	BASALT [6992]				Plio-Quaternary					VOL					WR [6992]	52.1538	0.733005	16.096	9.16759	10.7943	7.82207	0.1707	0.702882	2.11869	0.240988	100
[16078]	Aleutian Arc	ALEUTIAN ARC / CENTRAL ALEUTIAN ARC / TANAGA	SOUTH RIDGE, LAVA DIKE SW	51.865	-178.105	s_03TGGM107 [16078]	513	30.3963	BASALT [16078]				Plio-Quaternary					VOL					WR [16078]	49.666	0.875105	16.432	9.93119	11.4014	8.00096	0.176021	0.884106	2.4803	0.153018	100
[16078]	Aleutian Arc	ALEUTIAN ARC / CENTRAL ALEUTIAN ARC / TANAGA / PRE-TANAGA VOLCANICS	SMALL LAVA KNOB ON GRASSY SLOPE, OLD PACKAGE	51.865	-178.105	s_03TGMC61 [16078]	513	30.3963	BASALT [16078]				Plio-Quaternary					VOL					WR [16078]	46.9914	1.19104	16.5605	11.1103	12.4304	8.25025	0.187006	0.741022	2.40007	0.138004	100
[16078]	Aleutian Arc	ALEUTIAN ARC / CENTRAL ALEUTIAN ARC / TANAGA / UPPER SOUTH RIDGE	OVERLIES THE LOWER LAVA PACKAGE	51.865	-178.105	s_03TGGM108 [16078]	513	30.3963	BASALT [16078]				Plio-Quaternary					VOL					WR [16078]	49.888	0.829967	15.9994	9.63961	11.8395	8.28967	0.169993	0.805968	2.3899	0.147994	100
[6565]	Aleutian Arc	ALEUTIAN ARC / ALASKA PENINSULA / UPPER ALASKA PENINSULA / SOUTHWEST TRIDENT	KATMAI NATIONAL PARK	58.2	-155.1	s_97NT18 [6565]	600	31.074	NOT GIVEN [6565]				QUATERNARY			1958		VOL					WR [6565]	56.87	0.81	17.77	6.99	4.33	8.5	0.15	0.95	3.49	0.14	100
[6992]	Aleutian Arc	ALEUTIAN ARC / ALASKA PENINSULA / UPPER ALASKA PENINSULA / KATMAI GROUP	KATMAI NATIONAL PARK, SADDLEHORN CLUSTER, SAYRE MESA, SURFACE OF LAVA PLATEAU, CAPS BASEMENT RIDGE	58.39	-155.23	s_2449 [6992]	1035	34.4626	NOT GIVEN [6992]				Plio-Quaternary					VOL					WR [6992]	54.3675	0.692771	16.1145	7.14859	8.8755	8.76506	0.140562	0.662651	3.03213	0.200803	100
[6565][2195][4190]	Aleutian Arc	ALEUTIAN ARC / CENTRAL ALEUTIAN ARC / KASATOCHI / KASATOCHI		52.17	-175.5	s_K81-7A [6565]	72	26.9609	NOT GIVEN [6565] / ANDESITE [2195]				QUATERNARY			1899		VOL					WR [6565]	49.6258	0.667476	15.9284	8.9199	12.6618	8.86934	0.141586	0.768608	2.26537	0.151699	100
[6565][22052]	Aleutian Arc	ALEUTIAN ARC / ALASKA PENINSULA / UPPER ALASKA PENINSULA / SOUTHWEST TRIDENT	KATMAI NATIONAL PARK	58.2	-155.1	s_97ND02 [6565]	600	31.074	NOT GIVEN [6565]				QUATERNARY			1912		VOL					WR [6565]	55.1545	0.829917	17.3083	8.60914	4.82952	9.19908	0.149985	0.859914	2.91971	0.139986	100
[8317]	Aleutian Arc	ALEUTIAN ARC / ALASKA PENINSULA / UPPER ALASKA PENINSULA	EASTERN UKINREK MAAR, NEAR BECHAROF LAKE, 13 KM NW OF MOUNT PEULIK	57.83	-156.51	s_JRC10B [8317]	56	26.8362	BASALT [8317]				Plio-Quaternary					VOL					WR [8317]	48.4368	1.05801	17.3313	9.66583	10.0259	9.19968	0.161221	0.826258	3.0632	0.231755	100			0.07	0.07
[6565][22052][7092]	Aleutian Arc	ALEUTIAN ARC / ALASKA PENINSULA / UPPER ALASKA PENINSULA	UKINREK MAARS, NEAR BECHAROF LAKE, 13 KM NW OF MOUNT PEULIK	57.83	-156.51	s_UK-25B [6565] / s_UK-253 (25B) [22052]	56	26.8362	NOT GIVEN [6565]				QUATERNARY			1977		VOL					WR [6565]	49.0634	1.05179	16.9288	9.68647	9.80667	9.27577	0	0.821396	3.13533	0.230392	100
[6992]	Aleutian Arc	ALEUTIAN ARC / ALASKA PENINSULA / UPPER ALASKA PENINSULA	UKINREK MAARS, NEAR BECHAROF LAKE, 13 KM NW OF MOUNT PEULIK	57.83	-156.51	s_2687 [6992]	56	26.8362	BASALT [6992]				Plio-Quaternary					VOL					WR [6992]	47.8619	1.08412	17.1853	10.008	10.2891	9.62658	0.180687	0.722746	2.80064	0.240915	100
[22260]	Aleutian Arc	ALEUTIAN ARC / CENTRAL ALEUTIAN ARC / GREAT SITKIN / GREAT SITKIN	N SIDE OF YOKE BAY	52.0186	-176.031	s_GS80-R13 [22260]	7	26.4545	BASALT [22260]		2.91		Plio-Quaternary					VOL					WR [22260]	48.835	0.801612	17.2482	9.85798	8.2402	10.6312	0.175128	1.36899	2.75113	0.0904766	100
[6565][22052]	Aleutian Arc	ALEUTIAN ARC / CENTRAL ALEUTIAN ARC / RAT ISLANDS / KISKA		52	177.5	s_54-445 [6565]	121	27.3426	NOT GIVEN [6565]				HISTORICAL [6565]					VOL					WR [6565]	49.919	0.830464	15.8396	9.16549	10.0567	10.8365	0.151914	0.445615	2.64331	0.111404	100
[6565]	Aleutian Arc	ALEUTIAN ARC / SECOND ALEUTIAN ARC / UMNAK		53.33	-168.33	s_46ABY531 [6565]	38	26.696	NOT GIVEN [6565]				QUATERNARY			1946		VOL					WR [6565]	48.2776	0.733153	15.6774	9.12926	10.8065	12.7348	0.170734	0.482073	1.86803	0.120518	100
[6992]	Aleutian Arc	ALEUTIAN ARC / ALASKA PENINSULA / UPPER ALASKA PENINSULA / KATMAI GROUP	KATMAI NATIONAL PARK, SADDLEHORN CLUSTER, MAYNARD CRAG, NW TOE OF CRAGGY INTRUSIVE PLUG	58.38	-155.22	s_2448 [6992]	1153	35.3819	BASALT [6992]				Plio-Quaternary					VOL					WR [6992]	52.1185	0.572289	13.3333	7.73092	10.4618	12.8514	0.140562	0.481928	2.14859	0.160643	100
[24446]	Andean Arc	ANDEAN ARC / CENTRAL ANDEAN VOLCANIC ZONE / CHILE / EL PAIS LAVA FLOW FIELD		-23.8	-68	s_IT-EP-41 [24446]	3061	50.2452	ANDESITE, BASALTIC [24446]				PLIOCENE [24446]					VOL					WR [24446]	56.2762	1.04603	15.013	8.16896	7.64096	7.00339	0.13947	1.41462	3.06834	0.229129	100														0.01
[3216]	Andean Arc	ANDEAN ARC / SOUTHERN ANDEAN VOLCANIC ZONE / CHILE / PUYEHUE		-40.59	-72.12	s_II-B6 [3216]	1951	41.5983	BASALT [3216]				Quaternary					VOL					WR [3216]	51.6175	0.912686	18.132	8.40686	10.0903	7.01754	0.172396	0.567894	2.89017	0.192678	100			0.21			0.04
[21041]	Andean Arc	ANDEAN ARC / SOUTHERN ANDEAN VOLCANIC ZONE / CHILE / LA BARDA		-39.22	-71.79	s_LEM-22 [21041]	945	33.7615	BASALT [21041]				Holocene					VOL					WR [21041]	50.5473	1.11789	18.0901	9.37295	9.46375	7.02215	0.158402	0.696161	3.17813	0.353125	100
[11725]	Andean Arc	ANDEAN ARC / CENTRAL ANDEAN VOLCANIC ZONE / BOLIVIA	NEKHE KKOTA, CENTRAL ALTIPLANO	-19.4833	-67.4516	s_MAAR-1, BOMB C [11725]	3688	55.1295	NOT GIVEN [11725]				PLIO-QUATERNARY					VOL					WR [11725]	53.0685	1.44595	15.9457	7.77027	8.26402	7.04902	0.15062	2.32959	3.55464	0.421736	100
[17669][24044]	Andean Arc	ANDEAN ARC / CENTRAL ANDEAN VOLCANIC ZONE / ARGENTINA / SALAR DE ANTOFALLA	Antofalla	-26.372	-68.071	s_CO99 [17669]	3340	52.4186	ANDESITE, BASALTIC [17669] / NOT GIVEN [24044]	0.6			Quaternary					VOL					WR [17669]	53.5678	1.1904	16.5219	7.51861	8.11726	7.12185	0.133406	1.81638	3.7559	0.256551	100			0.79			0.09
[24673]	Andean Arc	ANDEAN ARC / CENTRAL ANDEAN VOLCANIC ZONE / CHILE / CERRO OVERO MAAR		-23.35	-67.6667	s_CIUP 7-42 [24673]	4970	65.1163	ANDESITE [24673]				QUATERNARY					VOL					WR [24673]	55.828	0.865268	15.4459	7.57822	8.31067	7.12521	0.118075	1.34459	3.18638	0.197725	100
[4889]	Andean Arc	ANDEAN ARC / CENTRAL ANDEAN VOLCANIC ZONE / ARGENTINA / CERRO SAN JERONIMO (GERONIMO)		-24.23	-66.5	s_5 [4889]	4775	63.5973	SHOSHONITE [4889]				QUATERNARY [4889]					VOL					WR [4889]	55.9769	1.22128	15.1499	6.36543	6.64132	7.14598	0.121118	3.91616	2.88665	0.575312	100
[5]	Andean Arc	ANDEAN ARC / CENTRAL ANDEAN VOLCANIC ZONE	Antofogasta	-26.4499	-67.4322	P07-CH101	3030	50.0037		0.75			QUATERNARY					VOL					WR	52.4949	1.47658	16.2831	8.06517	8.50305	7.15886	0.142566	1.72098	3.75764	0.397149	100
[21041]	Andean Arc	ANDEAN ARC / SOUTHERN ANDEAN VOLCANIC ZONE / CHILE / LA BARDA		-39.22	-71.79	s_LEM-19 [21041]	945	33.7615	BASALT [21041]				Holocene					VOL					WR [21041]	51.1482	1.06479	17.5756	9.48158	9.4112	7.169	0.157859	0.66361	2.9963	0.331805	100
[21041]	Andean Arc	ANDEAN ARC / SOUTHERN ANDEAN VOLCANIC ZONE / CHILE / HUILILCO		-39.43	-71.62	s_PVM-15A [21041]	994	34.1433	ANDESITE, BASALTIC [21041]				Holocene					VOL					WR [21041]	54.4525	0.953404	16.2447	7.85638	9.16577	7.17099	0.146284	0.88998	2.84384	0.276201	100
[21041]	Andean Arc	ANDEAN ARC / SOUTHERN ANDEAN VOLCANIC ZONE / CHILE / LA BARDA		-39.22	-71.79	s_LEM-14 [21041]	945	33.7615	BASALT [21041]				Holocene					VOL					WR [21041]	51.844	1.06202	17.3154	8.92346	9.44476	7.19601	0.156391	0.705291	3.03582	0.31687	100
[24446]	Andean Arc	ANDEAN ARC / CENTRAL ANDEAN VOLCANIC ZONE / CHILE / EL PAIS LAVA FLOW FIELD		-23.8	-68	s_IT-EP-52A [24446]	3061	50.2452	ANDESITE, BASALTIC [24446]				PLIOCENE [24446]					VOL					WR [24446]	55.9315	1.03113	15.2868	8.36921	7.48824	7.19792	0.150165	1.16128	3.04335	0.340374	100														0
[21041]	Andean Arc	ANDEAN ARC / SOUTHERN ANDEAN VOLCANIC ZONE / CHILE / LA BARDA		-39.22	-71.79	s_BARDA2-4 [21041]	945	33.7615	BASALT [21041]				Holocene					VOL					WR [21041]	51.144	1.10442	17.2204	9.28968	9.66492	7.21066	0.157194	0.70991	3.16417	0.334672	100
[21041]	Andean Arc	ANDEAN ARC / SOUTHERN ANDEAN VOLCANIC ZONE / CHILE / LA BARDA		-39.22	-71.79	s_LEM-25 [21041]	945	33.7615	BASALT [21041]				Holocene					VOL					WR [21041]	50.6151	1.11804	18.0747	9.07777	9.33049	7.21774	0.158709	0.778383	3.3056	0.323484	100
[21041]	Andean Arc	ANDEAN ARC / SOUTHERN ANDEAN VOLCANIC ZONE / CHILE / LA BARDA		-39.22	-71.79	s_LEM-20 [21041]	945	33.7615	BASALT [21041]				Holocene					VOL					WR [21041]	50.6744	1.10681	18.195	8.98518	9.35276	7.21878	0.158262	0.735151	3.23671	0.336944	100
[24673]	Andean Arc	ANDEAN ARC / CENTRAL ANDEAN VOLCANIC ZONE / CHILE / CERRO OVERO MAAR		-23.35	-67.6667	s_CIUP 7-39 [24673]	4970	65.1163	ANDESITE [24673]				QUATERNARY					VOL					WR [24673]	56.0418	0.894664	15.6423	7.80277	7.65229	7.22144	0.121513	1.20668	3.21609	0.200401	100
[7318]	Andean Arc	ANDEAN ARC / SOUTHERN ANDEAN VOLCANIC ZONE / CHILE / CASABLANCA		-40.75	-72	s_120183-03 [7318]	1239	36.0518	BASALT [7318]				QUATERNARY [7318]					VOL					WR [7318]	51.475	0.535462	18.4785	9.21398	9.20388	7.23378	0.141443	0.36371	3.12184	0.23237	100
[11725]	Andean Arc	ANDEAN ARC / CENTRAL ANDEAN VOLCANIC ZONE / BOLIVIA	PARINUYO, S OF EST. CHULLUNQUIANI, CENTRAL ALTIPLANO	-19.0833	-67.6333	s_HUI-3 [11725]	3694	55.1763	NOT GIVEN [11725]				PLIO-QUATERNARY					VOL					WR [11725]	54.2333	1.39189	16.0572	7.85285	7.20152	7.24186	0.13112	2.36016	3.17714	0.353016	100
[21041]	Andean Arc	ANDEAN ARC / SOUTHERN ANDEAN VOLCANIC ZONE / CHILE / LA BARDA		-39.22	-71.79	s_LEM-21 [21041]	945	33.7615	BASALT [21041]				Holocene					VOL					WR [21041]	50.7548	1.10038	17.6727	9.28602	9.48811	7.24491	0.15864	0.687105	3.26375	0.343552	100
[21041]	Andean Arc	ANDEAN ARC / SOUTHERN ANDEAN VOLCANIC ZONE / CHILE / LA BARDA		-39.22	-71.79	s_LEM-23 [21041]	945	33.7615	BASALT [21041]				Holocene					VOL					WR [21041]	51.0787	1.11071	17.517	9.08399	9.40448	7.25117	0.157242	0.741141	3.31511	0.340524	100
[20676]	Andean Arc	ANDEAN ARC / SOUTHERN ANDEAN VOLCANIC ZONE / CHILE / MOCHO-CHOSHUENCO	KANGECHI CONE	-39.865	-71.896	s_130130_02D [20676]	719	32.001	BASALT [20676]				Quaternary					VOL					WR [20676]	49.9418	1.28663	18.9444	9.14086	8.59259	7.25958	0.171774	0.968765	3.30014	0.393483	100
[11951]	Andean Arc	ANDEAN ARC / SOUTHERN ANDEAN VOLCANIC ZONE / CHILE / PUYEHUE		-40.6105	-72.1213	s_PU-02-02I [11951]	1420	37.4618	ANDESITE, BASALTIC [11951]				Quaternary					VOL					WR [11951]	52.8039	0.82115	17.0038	9.10274	9.23293	7.29021	0.15021	0.570799	2.89405	0.130182	100
[21041]	Andean Arc	ANDEAN ARC / SOUTHERN ANDEAN VOLCANIC ZONE / CHILE / LA BARDA		-39.22	-71.79	s_BARDA2-3 [21041]	945	33.7615	BASALT [21041]				Holocene					VOL					WR [21041]	50.8342	1.13626	17.4131	9.3526	9.66025	7.3221	0.158953	0.687088	3.09702	0.338416	100
[11725]	Andean Arc	ANDEAN ARC / CENTRAL ANDEAN VOLCANIC ZONE / BOLIVIA	NEKHE KKOTA, CENTRAL ALTIPLANO	-19.4833	-67.4516	s_MAAR-2 [11725]	3688	55.1295	NOT GIVEN [11725]				Plio-Pleistocene					VOL					WR [11725]	52.326	1.42295	15.935	8.06358	8.72942	7.34684	0.151377	2.12937	3.49177	0.403673	100
[24673]	Andean Arc	ANDEAN ARC / CENTRAL ANDEAN VOLCANIC ZONE / CHILE / CERRO OVERO MAAR		-23.35	-67.6667	s_CO 04A [24673]	4970	65.1163	ANDESITE [24673]				QUATERNARY					VOL					WR [24673]	54.8231	0.9017	16.0552	7.73065	8.2269	7.3562	0.121975	1.3257	3.23952	0.219057	100
[17669][24044]	Andean Arc	ANDEAN ARC / CENTRAL ANDEAN VOLCANIC ZONE / ARGENTINA	SOUTHERN PUNA PLATEAU, BACK-ARC MAFIC SUITE	-25.87	-67.436	s_SAF202 [17669]	3733	55.4801	ANDESITE, BASALTIC [17669] / NOT GIVEN [24044]	2.8			Quaternary					VOL					WR [17669]	54.5325	1.3047	16.1049	7.94718	7.66512	7.35933	0.132509	1.94686	2.79288	0.214053	100			0.82			0.04
[21041]	Andean Arc	ANDEAN ARC / SOUTHERN ANDEAN VOLCANIC ZONE / CHILE / LA BARDA		-39.22	-71.79	s_LEM-21A [21041]	945	33.7615	BASALT [21041]				Holocene					VOL					WR [21041]	50.9752	1.0775	17.704	8.93339	9.49299	7.38683	0.15669	0.69188	3.2559	0.32559	100
[20676]	Andean Arc	ANDEAN ARC / SOUTHERN ANDEAN VOLCANIC ZONE / CHILE / MOCHO-CHOSHUENCO	KANGECHI CONE	-39.853	-71.921	s_130107_01A [20676]	736	32.1334	BASALT [20676]				Quaternary					VOL					WR [20676]	51.0607	1.23551	18.7035	9.24021	8.09484	7.40029	0.169071	0.8788	2.86629	0.350862	100
[20346]	Andean Arc	ANDEAN ARC / SOUTHERN ANDEAN VOLCANIC ZONE / CHILE / LA BARDA		-39.2	-71.8	s_150194-5A [20346]	484	30.1704	BASALT [20346]				Quaternary					VOL					WR [20346]	51.2237	1.07201	17.5667	8.82888	9.42557	7.40291	0.161812	0.738269	3.28681	0.293285	100
[21041]	Andean Arc	ANDEAN ARC / SOUTHERN ANDEAN VOLCANIC ZONE / CHILE / HUILILCO		-39.43	-71.62	s_PVM-15B [21041]	994	34.1433	ANDESITE, BASALTIC [21041]				Holocene					VOL					WR [21041]	53.8495	0.962508	16.4288	7.97507	9.18711	7.40469	0.148705	0.906489	2.84169	0.295373	100
[24673]	Andean Arc	ANDEAN ARC / CENTRAL ANDEAN VOLCANIC ZONE / CHILE / CERRO OVERO MAAR		-23.35	-67.6667	s_CO 06 [24673]	4970	65.1163	ANDESITE [24673]				QUATERNARY					VOL					WR [24673]	54.4232	0.928702	16.272	8.0739	7.95608	7.40476	0.12439	1.27495	3.33652	0.205517	100
[5180]	Andean Arc	ANDEAN ARC / SOUTHERN ANDEAN VOLCANIC ZONE / CHILE / SAN PEDRO-PELLADO/TATARA		-36	-70.83	s_H-8I [5180]	2687	47.3317	NOT GIVEN [5180]				HOLOCENE [5180]					VOL					WR [5180]	52.785	0.995375	17.4442	8.64669	8.05349	7.41001	0.150814	1.02554	3.24754	0.241303	100
[3831][3996]	Andean Arc	ANDEAN ARC / SOUTHERN ANDEAN VOLCANIC ZONE / CHILE / VILLARRICA / VILLARRICA II		-39.42	-71.95	s_V2-4 [3831]	2273	44.1067	BASALT [3831]				QUATERNARY [3996]					VOL					WR [3831]	52.2484	0.98525	16.9905	8.60294	9.86256	7.43965	0.160857	0.583107	2.93564	0.191018	100
[18780]	Andean Arc	ANDEAN ARC / SOUTHERN ANDEAN VOLCANIC ZONE / CHILE / VILLARRICA		-39.396	-71.952	s_CL170 [18780]	1720	39.7988	NOT GIVEN [18780]				HOLOCENE [18780]					VOL					WR [18780]	52.0021	1.19127	16.0519	9.85693	9.46962	7.44041	0.161529	0.646115	2.9479	0.232197	100
[21041]	Andean Arc	ANDEAN ARC / SOUTHERN ANDEAN VOLCANIC ZONE / CHILE / LA BARDA		-39.22	-71.79	s_LEM-16 [21041]	945	33.7615	BASALT [21041]				Holocene					VOL					WR [21041]	51.4167	1.0676	17.3851	8.93544	9.41105	7.458	0.156851	0.657762	3.17749	0.33394	100
[19914][21041]	Andean Arc	ANDEAN ARC / SOUTHERN ANDEAN VOLCANIC ZONE / CHILE / CABURGUA(CABURGA)	CINDER CONE	-39.2	-71.82	s_CAB2-2 [19914]	566	30.8091	BASALT [19914]				QUATERNARY					VOL					WR [19914]	51.3788	1.13152	17.4734	9.13224	8.85186	7.46	0.156209	0.751006	3.33447	0.330443	100
[9717]	Andean Arc	ANDEAN ARC / CENTRAL ANDEAN VOLCANIC ZONE / ARGENTINA / LOS GEMELOS	GEMELO SUR, PUNA CORDILLERA ORIENTAL BOUNDARY, NW-ARGENTINA	-24.7897	-66.1767	s_OSI 26 [9717]	2914	49.1001	SHOSHONITE [9717]				QUATERNARY [9717]					VOL					WR [9717]	54.2907	1.42709	14.22	7.12675	7.31895	7.46166	0.122322	4.06722	3.05806	0.907224	100
[24673]	Andean Arc	ANDEAN ARC / CENTRAL ANDEAN VOLCANIC ZONE / CHILE / CERRO OVERO MAAR		-23.35	-67.6667	s_CO 21 [24673]	4970	65.1163	ANDESITE [24673]				QUATERNARY					VOL					WR [24673]	55.0212	0.897609	15.8201	7.94537	8.01821	7.46913	0.123288	1.23487	3.26748	0.202763	100
[5180]	Andean Arc	ANDEAN ARC / SOUTHERN ANDEAN VOLCANIC ZONE / CHILE / SAN PEDRO-PELLADO/TATARA		-36	-70.83	s_H-23I [5180]	2687	47.3317	NOT GIVEN [5180]				HOLOCENE [5180]					VOL					WR [5180]	52.7534	0.996678	17.3563	8.5372	8.12443	7.47005	0.151012	1.09735	3.29206	0.221484	100
[23134]	Andean Arc	ANDEAN ARC / SOUTHERN ANDEAN VOLCANIC ZONE / CHILE / LA PICADA		-41.0635	-72.447	s_PIC05 [23134]	1142	35.2962	NOT GIVEN [23134]				QUATERNARY [23134]					VOL					WR [23134]	52.0189	0.852769	17.7232	8.74345	9.76061	7.47971	0.154115	0.513716	2.65078	0.102743	100
[21041]	Andean Arc	ANDEAN ARC / SOUTHERN ANDEAN VOLCANIC ZONE / CHILE / LA BARDA		-39.22	-71.79	s_LEM-17 [21041]	945	33.7615	BASALT [21041]				Holocene					VOL					WR [21041]	50.7994	1.0788	17.5075	9.29929	9.52362	7.4843	0.157027	0.642385	3.18134	0.326291	100
[20676]	Andean Arc	ANDEAN ARC / SOUTHERN ANDEAN VOLCANIC ZONE / CHILE / MOCHO-CHOSHUENCO	KANGECHI CONE	-39.86	-71.903	s_130121_10A [20676]	719	32.001	BASALT [20676]				Quaternary					VOL					WR [20676]	50.6549	1.17016	18.2121	8.79056	9.00434	7.49213	0.157653	0.918624	3.28408	0.31538	100
[4350]	Andean Arc	ANDEAN ARC / SOUTHERN ANDEAN VOLCANIC ZONE / CHILE / LA VIGUERIA		-41.3	-72.225	s_151284-4 [4350]	751	32.2503	ANDESITE, BASALTIC [4350]				POSTGLACIAL [4350]					VOL					WR [4350]	51.9923	0.837284	17.7343	8.11056	9.94653	7.53556	0.151316	0.67588	2.82457	0.191668	100
[21645]	Andean Arc	ANDEAN ARC / SOUTHERN ANDEAN VOLCANIC ZONE / CHILE / ANTUCO	1853 ERUPTION	-37.41	-71.35	s_010283-03 [21645]	2597	46.6306	BASALT [21645]				Pliocene-Quaternary					VOL					WR [21645]	51.4355	0.9907	17.873	8.74444	8.89608	7.54145	0.141529	0.798625	3.36636	0.212293	100
[4350][7318]	Andean Arc	ANDEAN ARC / SOUTHERN ANDEAN VOLCANIC ZONE / CHILE / POCOIHUEN		-41.499	-72.33	s_16185-3 [4350] / s_160185-03 [7318]	25	26.5947	ANDESITE, BASALTIC [4350] / BASALT [7318]			UPPER [4350]	GLACIAL [4350] / QUATERNARY [7318]					VOL					WR [4350]	52.2911	0.91845	17.1175	8.29633	10.0323	7.55955	0.161486	0.645943	2.79572	0.181671	100
[4889]	Andean Arc	ANDEAN ARC / CENTRAL ANDEAN VOLCANIC ZONE / ARGENTINA / CERRO NEGRO DE CHORRILLOS		-24.305	-66.415	s_1 [4889]	4447	61.0421	SHOSHONITE [4889]				QUATERNARY [4889]					VOL					WR [4889]	54.0714	1.75589	15.0806	6.95791	6.37137	7.57541	0.140471	4.32451	2.82949	0.892995	100
[23134]	Andean Arc	ANDEAN ARC / SOUTHERN ANDEAN VOLCANIC ZONE / CHILE / LA PICADA		-41.0672	-72.4488	s_PIC04 [23134]	1142	35.2962	NOT GIVEN [23134]				QUATERNARY [23134]					VOL					WR [23134]	51.8381	0.873845	17.5372	8.61792	10.0542	7.58337	0.150663	0.472077	2.74207	0.130575	100
[24673]	Andean Arc	ANDEAN ARC / CENTRAL ANDEAN VOLCANIC ZONE / CHILE / CERRO OVERO MAAR		-23.35	-67.6667	s_CO 13 [24673]	4970	65.1163	ANDESITE [24673]				QUATERNARY					VOL					WR [24673]	54.2892	0.918932	16.0374	8.01009	8.2811	7.59537	0.122969	1.22239	3.32014	0.202422	100
[24673]	Andean Arc	ANDEAN ARC / CENTRAL ANDEAN VOLCANIC ZONE / CHILE / CERRO OVERO MAAR		-23.35	-67.6667	s_CIUP 8-12 [24673]	4970	65.1163	ANDESITE [24673]				QUATERNARY					VOL					WR [24673]	54.123	0.923773	16.2488	8.2696	7.92481	7.59785	0.125247	1.24491	3.3397	0.202318	100
[24673]	Andean Arc	ANDEAN ARC / CENTRAL ANDEAN VOLCANIC ZONE / CHILE / CERRO OVERO MAAR		-23.35	-67.6667	s_CO 14 [24673]	4970	65.1163	ANDESITE [24673]				QUATERNARY					VOL					WR [24673]	54.1666	0.922204	16.2334	8.11917	8.03073	7.6025	0.123903	1.25193	3.35507	0.194455	100
[20676]	Andean Arc	ANDEAN ARC / SOUTHERN ANDEAN VOLCANIC ZONE / CHILE / MOCHO-CHOSHUENCO	KANGECHI CONE	-39.865	-71.887	s_130111_08A [20676]	737	32.1412	BASALT [20676]				Quaternary					VOL					WR [20676]	51.8035	1.10456	17.7668	8.5335	8.97809	7.61895	0.148252	0.779681	2.93617	0.330472	100
[23134]	Andean Arc	ANDEAN ARC / SOUTHERN ANDEAN VOLCANIC ZONE / CHILE / LA PICADA		-41.0708	-72.4695	s_PIC50 [23134]	1040	34.5016	NOT GIVEN [23134]				QUATERNARY [23134]					VOL					WR [23134]	50.9361	0.834351	17.9182	8.57753	11.0399	7.62108	0.152625	0.295075	2.5234	0.10175	100
[20346]	Andean Arc	ANDEAN ARC / SOUTHERN ANDEAN VOLCANIC ZONE / CHILE / LA BARDA		-39.2	-71.8	s_150194-6 [20346]	484	30.1704	BASALT [20346]				Quaternary					VOL					WR [20346]	50.6437	1.06618	17.924	8.68035	9.656	7.66445	0.160933	0.673909	3.22873	0.30175	100
[11725]	Andean Arc	ANDEAN ARC / CENTRAL ANDEAN VOLCANIC ZONE / BOLIVIA	PARINUYO, S OF EST. CHULLUNQUIANI, CENTRAL ALTIPLANO	-19.0666	-67.62	s_HUI-1 [11725]	3688	55.1295	NOT GIVEN [11725]				Plio-Quaternary					VOL					WR [11725]	52.8017	1.40751	16.0858	8.1098	8.16355	7.67092	0.140751	2.09116	3.15684	0.371984	100
[9717]	Andean Arc	ANDEAN ARC / CENTRAL ANDEAN VOLCANIC ZONE / ARGENTINA / LOS GEMELOS	GEMELO SUR, PUNA CORDILLERA ORIENTAL BOUNDARY, NW-ARGENTINA	-24.7561	-66.1736	s_OSI 24 [9717]	3323	52.2862	SHOSHONITE [9717]				QUATERNARY [9717]					VOL					WR [9717]	54.1551	1.44143	14.1098	7.26136	7.19699	7.69438	0.11166	4.01976	3.09603	0.913581	100
[21041]	Andean Arc	ANDEAN ARC / SOUTHERN ANDEAN VOLCANIC ZONE / CHILE / LA BARDA		-39.22	-71.79	s_BARDA1-2 [21041]	945	33.7615	BASALT [21041]				Holocene					VOL					WR [21041]	51.2959	1.09506	17.102	9.14073	9.22207	7.71726	0.156582	0.752407	3.18248	0.335533	100
[23710]	Andean Arc	ANDEAN ARC / NORTHERN ANDEAN VOLCANIC ZONE / ECUADOR / CHACHIMBIRO		0.77	-78.37	s_T14-033 X [23710]	1510	38.1629	NOT GIVEN [23710]				QUATERNARY [23710]				MICROGRANULAR, MICROPORPHYRITIC [23710]	VOL					WR [23710]	45.4997	1.16562	19.704	11.0379	12.6191	7.73363	0.202716	0.182445	1.39874	0.456112	100
[4350]	Andean Arc	ANDEAN ARC / SOUTHERN ANDEAN VOLCANIC ZONE / CHILE / POCOIHUEN		-41.499	-72.33	s_151284-1 [4350]	25	26.5947	ANDESITE, BASALTIC [4350]			UPPER [4350]	GLACIAL [4350]					VOL					WR [4350]	52.3204	0.918079	17.05	8.34342	9.91727	7.7381	0.161421	0.655771	2.71388	0.181598	100
[19945]	Andean Arc	ANDEAN ARC / SOUTHERN ANDEAN VOLCANIC ZONE / CHILE / CARRAN-LOS VENADOS VOLCANIC FIELD	LOS GUINDOS	-40.283	-72.0602	s_FB210314-2 [19945]	224	28.145	BASALT [19945]				Quaternary					VOL					WR [19945]	50.942	1.17755	17.0797	9.32828	9.14397	7.75138	0.163834	1.12636	3.0002	0.286709	100
[5]	Andean Arc	ANDEAN ARC / CENTRAL ANDEAN VOLCANIC ZONE	Pasto Ventura	-26.7022	-67.2476	P07-PV102	3812	56.0955		0.96			QUATERNARY					VOL					WR	53.617	1.12091	14.6134	7.15101	9.74572	7.77374	0.134925	1.98236	3.3835	0.477426	100
[21041]	Andean Arc	ANDEAN ARC / SOUTHERN ANDEAN VOLCANIC ZONE / CHILE / LA BARDA		-39.22	-71.79	s_BARDA1-1 [21041]	945	33.7615	BASALT [21041]				Holocene					VOL					WR [21041]	50.9966	1.08878	17.0192	9.48229	9.21748	7.78139	0.15685	0.74351	3.18792	0.325922	100
[13695]	Andean Arc	ANDEAN ARC / CENTRAL ANDEAN VOLCANIC ZONE / CHILE / EL NEGRILLAR		-24.4706	-68.4522	s_NEGRITO-98-33 [13695]	4056	57.9962	ANDESITE, BASALTIC [13695]				QUATERNARY [13695]					VOL					WR [13695]	55.0263	0.837049	16.0113	7.23551	8.51236	7.78273	0.131739	1.06405	3.2124	0.186461	100
[24673]	Andean Arc	ANDEAN ARC / CENTRAL ANDEAN VOLCANIC ZONE / CHILE / CERRO OVERO MAAR		-23.35	-67.6667	s_CO 33 [24673]	4970	65.1163	ANDESITE [24673]				QUATERNARY					VOL					WR [24673]	52.7706	0.929864	16.482	8.24975	8.7179	7.8379	0.127146	1.29136	3.38065	0.212824	100
[11725]	Andean Arc	ANDEAN ARC / CENTRAL ANDEAN VOLCANIC ZONE / BOLIVIA	ESTANCIA LUCA, S OF SALAR DE COIPASA, CENTRAL ALTIPLANO	-19.5666	-67.95	s_R93-19 [11725]	3756	55.6592	NOT GIVEN [11725]				PLIO-QUATERNARY					VOL					WR [11725]	53.418	1.60224	15.4077	8.08799	7.05388	7.91042	0.120924	1.89447	3.9804	0.524002	100
[20960]	Andean Arc	ANDEAN ARC / NORTHERN ANDEAN VOLCANIC ZONE / ECUADOR / COTACACHI		0.361	-78.348	s_MM-1B [20960]	4467	61.1979	ANDESITE [20960]				Quaternary					VOL					WR [20960]	55.1748	0.665121	15.3179	8.16285	8.8179	7.93107	0.151164	0.775975	2.87212	0.131009	100
[9717]	Andean Arc	ANDEAN ARC / CENTRAL ANDEAN VOLCANIC ZONE / ARGENTINA / EL SALADILLO	SALTA GROUP, PUNA CORDILLERA ORIENTAL BOUNDARY, NW-ARGENTINA	-24.5592	-66.1947	s_OSI 21 [9717]	3570	54.2103	SHOSHONITE [9717]				QUATERNARY [9717]					VOL					WR [9717]	55.758	1.17568	14.7114	6.37487	6.43047	7.93329	0.112456	4.06888	2.75007	0.684962	100
[20960]	Andean Arc	ANDEAN ARC / NORTHERN ANDEAN VOLCANIC ZONE / ECUADOR / LICTO		-1.784	-78.615	s_RIO10A [20960]	3106	50.5957	ANDESITE, BASALTIC [20960]				Quaternary					VOL					WR [20960]	53.4575	1.00233	16.0474	8.10975	8.30212	7.99838	0.131619	1.18457	3.51321	0.253113	100
[20676]	Andean Arc	ANDEAN ARC / SOUTHERN ANDEAN VOLCANIC ZONE / CHILE / MOCHO-CHOSHUENCO	KANGECHI CONE	-39.866	-71.904	s_130130_04A [20676]	719	32.001	BASALT [20676]				Quaternary					VOL					WR [20676]	50.2482	1.21979	18.7663	9.42849	8.38214	8.01288	0.169782	0.782091	2.69384	0.296496	100
[17669][24044]	Andean Arc	ANDEAN ARC / CENTRAL ANDEAN VOLCANIC ZONE / ARGENTINA	SOUTHERN PUNA PLATEAU, BACK-ARC MAFIC SUITE	-26.306	-67.39	s_SAF218 [17669]	3161	51.0242	BASALT [17669] / NOT GIVEN [24044]	3.2			Quaternary					VOL					WR [17669]	52.8767	1.4608	15.5338	8.02135	8.64132	8.04466	0.133735	1.88257	3.02446	0.38063	100			0.85			0.09
[17669][24044]	Andean Arc	ANDEAN ARC / CENTRAL ANDEAN VOLCANIC ZONE / ARGENTINA	SOUTHERN PUNA PLATEAU, BACK-ARC MAFIC SUITE	-25.853	-67.31	s_SAF207 [17669]	4055	57.9884	ANDESITE, BASALTIC [17669] / NOT GIVEN [24044]	2.4			Quaternary					VOL					WR [17669]	57.1278	1.15897	14.9743	6.67754	6.33842	8.06149	0.11282	2.60511	2.65639	0.287178	100			1.14			0.13
[20960][15840]	Andean Arc	ANDEAN ARC / NORTHERN ANDEAN VOLCANIC ZONE / ECUADOR / ALMAS SANTAS		-0.59	-78.854	s_ALS-66 [20960] / s_ALS 66 [15840]	3519	53.813	ANDESITE, BASALTIC [20960]				Quaternary					VOL					WR [20960]	53.8889	0.757576	16.3131	8.31313	8.43434	8.08081	0.141414	0.535354	3.38384	0.151515	100
[11725]	Andean Arc	ANDEAN ARC / CENTRAL ANDEAN VOLCANIC ZONE / BOLIVIA / SALAR DE CHIGUANA	ALTIPLANO SW OF SALAR DE UYUNI	-21.05	-67.9583	s_7/91-8 [11725]	3682	55.0828	NOT GIVEN [11725]				PLIO-QUATERNARY					VOL					WR [11725]	54.3597	1.00779	15.6259	8.40294	7.14616	8.08269	0.142516	1.89343	3.06409	0.274852	100
[4]	Andean Arc	ANDEAN ARC / CENTRAL ANDEAN VOLCANIC ZONE	Arizaro	-24.819	-68.039	AZ7	3550	54.0545	BASALT	0.196			QUATERNARY					VOL					WR	52.5287	1.09574	16.2842	8.19274	8.79023	8.16236	0.143803	1.36714	3.20013	0.234946	100
[21041]	Andean Arc	ANDEAN ARC / SOUTHERN ANDEAN VOLCANIC ZONE / CHILE / HUILILCO		-39.43	-71.62	s_PVM-11 [21041]	994	34.1433	BASALT [21041]				Holocene					VOL					WR [21041]	52.6396	0.993624	16.659	8.16118	9.22214	8.19179	0.154042	0.89773	2.80541	0.27544	100
[17460]	Andean Arc	ANDEAN ARC / SOUTHERN ANDEAN VOLCANIC ZONE / CHILE / PALENA		-43.668	-72.334	s_826-3B [17460]	113	27.2803	BASALT [17460]				Quaternary					VOL					WR [17460]	50.2103	1.0157	18.7237	8.96686	9.46958	8.20765	0.164153	0.461681	2.58541	0.194932	100
[21041]	Andean Arc	ANDEAN ARC / SOUTHERN ANDEAN VOLCANIC ZONE / CHILE / CABURGUA(CABURGA)	CINDER CONE	-39.2	-71.82	s_LEM-CB-6 [21041]	566	30.8091	BASALT [21041]				Holocene					VOL					WR [21041]	50.5609	1.15031	18.1938	9.0766	8.50805	8.21361	0.164475	0.639626	3.21844	0.274126	100
[21041]	Andean Arc	ANDEAN ARC / SOUTHERN ANDEAN VOLCANIC ZONE / CHILE / CABURGUA(CABURGA)	CINDER CONE	-39.2	-71.82	s_LEM-CB-5 [21041]	566	30.8091	BASALT [21041]				Holocene					VOL					WR [21041]	51.1769	1.12083	17.7253	8.93404	8.4649	8.23033	0.166238	0.673112	3.23298	0.275364	100
[19324]	Andean Arc	ANDEAN ARC / NORTHERN ANDEAN VOLCANIC ZONE / ECUADOR / YANAURCU	ANDESITIC OLD YANAURCU	0.510096	-78.3218	s_PB12029B [19324]	3848	56.3759	BASALT [19324]				Pliocene-Quaternary					VOL					WR [19324]	49.6534	1.21724	15.4996	12.0946	11.0262	8.23669	0.182587	0.162299	1.8563	0.0710059	100
[17460]	Andean Arc	ANDEAN ARC / SOUTHERN ANDEAN VOLCANIC ZONE / CHILE / SOUTH MINCHINMAVIDA		-42.95	-72.468	s_C16-G7B [17460]	315	28.8539	BASALT [17460]				Quaternary					VOL					WR [17460]	51.2296	1.07277	17.4375	8.83514	9.09827	8.23803	0.161927	0.678069	2.97541	0.273252	100
[17460]	Andean Arc	ANDEAN ARC / SOUTHERN ANDEAN VOLCANIC ZONE / CHILE / PALENA		-43.668	-72.334	s_826-3A [17460]	113	27.2803	BASALT [17460]				Quaternary					VOL					WR [17460]	50.2609	1.03346	18.3976	9.0351	9.48532	8.32907	0.173949	0.491149	2.60923	0.184181	100
[21041]	Andean Arc	ANDEAN ARC / SOUTHERN ANDEAN VOLCANIC ZONE / CHILE / CABURGUA(CABURGA)	CINDER CONE	-39.2	-71.82	s_LEM-CB-7 [21041]	566	30.8091	BASALT [21041]				Holocene					VOL					WR [21041]	52.666	1.04452	16.8904	8.348	8.24569	8.46053	0.150387	0.695666	3.2328	0.26599	100
[4350]	Andean Arc	ANDEAN ARC / SOUTHERN ANDEAN VOLCANIC ZONE / CHILE / RELONCAVI		-41.3	-72.225	s_9185-3 [4350]	751	32.2503	BASALT [4350]				POSTGLACIAL [4350]					VOL					WR [4350]	50.8582	1.02989	17.1143	8.81462	9.71325	8.57229	0.171648	0.605816	2.86753	0.252423	100
[4350]	Andean Arc	ANDEAN ARC / SOUTHERN ANDEAN VOLCANIC ZONE / CHILE / RELONCAVI		-41.3	-72.225	s_16185-1 [4350]	751	32.2503	ANDESITE, BASALTIC [4350]				POSTGLACIAL [4350]					VOL					WR [4350]	51.8048	0.897358	16.7171	8.42912	9.77011	8.82234	0.161323	0.645291	2.58117	0.171406	100
[5]	Andean Arc	ANDEAN ARC / CENTRAL ANDEAN VOLCANIC ZONE	Pasto Ventura	-26.7045	-67.2487	P07-PV101	3812	56.0955		0.3			QUATERNARY					VOL					WR	51.5373	1.23795	15.312	8.02638	9.05124	8.8483	0.152207	1.84678	3.50076	0.487062	100
[9717]	Andean Arc	ANDEAN ARC / CENTRAL ANDEAN VOLCANIC ZONE / ARGENTINA / LOS GEMELOS	GEMELO NORTE, PUNA CORDILLERA ORIENTAL BOUNDARY, NW-ARGENTINA	-24.7469	-66.1769	s_OSI 25 [9717]	3003	49.7934	SHOSHONITE [9717]				QUATERNARY [9717]					VOL					WR [9717]	53.3526	1.29832	14.3626	7.74861	7.4856	8.8752	0.13186	2.93135	3.05307	0.760732	100
[5]	Andean Arc	ANDEAN ARC / CENTRAL ANDEAN VOLCANIC ZONE	Jote, Antofogasta	-26.3364	-67.3785	P07-J301	3126	50.7515		<4.5			QUATERNARY					VOL					WR	52.2861	1.33522	15.4461	7.8596	8.48675	9.16448	0.141614	1.80053	3.13575	0.343921	100
[11725]	Andean Arc	ANDEAN ARC / CENTRAL ANDEAN VOLCANIC ZONE / CHILE / CERRO COLORADO	E EST. ABAROA, ALTIPLANO SW OF SALAR DE UYUNI	-21.1	-68.0666	s_CCO-1 BOMB [11725]	3696	55.1918	NOT GIVEN [11725]				PLIO-QUATERNARY					VOL					WR [11725]	51.7355	0.942303	15.6746	8.82967	9.29131	9.17985	0.151984	1.20574	2.79651	0.192513	100
[20346]	Andean Arc	ANDEAN ARC / SOUTHERN ANDEAN VOLCANIC ZONE / CHILE / SAN JORGE		-39.27	-71.67	s_140194-5B [20346]	1344	36.8698	BASALT [20346]				Quaternary					VOL					WR [20346]	51.6556	0.784513	16.4952	8.87417	10.2089	9.34284	0.163016	0.417728	1.946	0.112073	100
[20346]	Andean Arc	ANDEAN ARC / SOUTHERN ANDEAN VOLCANIC ZONE / CHILE / SAN JORGE		-39.27	-71.67	s_140194-5A [20346]	1344	36.8698	BASALT [20346]				Quaternary					VOL					WR [20346]	51.6159	0.784993	16.4747	8.85921	10.2151	9.36895	0.163116	0.428178	1.98797	0.101947	100
[20346]	Andean Arc	ANDEAN ARC / SOUTHERN ANDEAN VOLCANIC ZONE / CHILE / SAN JORGE		-39.27	-71.67	s_140194-4 [20346]	1344	36.8698	BASALT [20346]				Quaternary					VOL					WR [20346]	51.298	0.814415	16.5224	8.65316	9.89514	9.41668	0.162883	0.427568	2.67739	0.132342	100
[20346]	Andean Arc	ANDEAN ARC / SOUTHERN ANDEAN VOLCANIC ZONE / CHILE / SAN JORGE		-39.27	-71.67	s_140194-7B [20346]	1344	36.8698	BASALT [20346]				Quaternary					VOL					WR [20346]	51.7311	0.781805	16.3164	8.85369	10.2142	9.42228	0.162453	0.456899	1.95959	0.101533	100
[3216]	Andean Arc	ANDEAN ARC / SOUTHERN ANDEAN VOLCANIC ZONE / CHILE / PUYEHUE		-40.59	-72.12	s_II-B10 [3216]	1951	41.5983	BASALT [3216]				Quaternary					VOL					WR [3216]	51.5447	0.664184	16.6751	8.09097	10.4056	9.4596	0.150951	0.493107	2.39509	0.120761	100			0.17			0.04
[17669]	Andean Arc	ANDEAN ARC / CENTRAL ANDEAN VOLCANIC ZONE / ARGENTINA	La Falda	-25.992	-67.543	s_RAN2 [17669]	3861	56.4772	ANDESITE, BASALTIC [17669]	0.03			Quaternary					VOL					WR [17669]	54.2488	1.14208	14.9898	7.5425	7.44392	9.48334	0.132563	1.7743	2.96737	0.275323	100			0.89			0.08
[7318]	Andean Arc	ANDEAN ARC / SOUTHERN ANDEAN VOLCANIC ZONE / CHILE / VILLARRICA		-39.42	-71.93	s_1 [7318]	2431	45.3375	BASALT [7318]				QUATERNARY [7318]					VOL					WR [7318]	49.868	0.802356	16.687	8.83608	10.5119	9.58765	0.14219	0.446882	2.97583	0.14219	100
[3216]	Andean Arc	ANDEAN ARC / SOUTHERN ANDEAN VOLCANIC ZONE / CHILE / PUYEHUE		-40.59	-72.12	s_II-B7 [3216]	1951	41.5983	BASALT [3216]				Quaternary					VOL					WR [3216]	51.2999	0.654978	16.6163	8.18218	10.4393	9.59291	0.130996	0.493753	2.47884	0.110842	100			0.1			0.05
[25100]	Andean Arc	ANDEAN ARC / NORTHERN ANDEAN VOLCANIC ZONE / COLOMBIA / PIJAOS VOLCANIC FIELD	EL TABOR CRATER	4.5	-75	s_T-IV [25100]	584	30.9494	ANDESITE, BASALTIC [25100]				QUATERNARY [25100]					VOL					WR [25100]	54.7495	0.925201	14.2542	6.82209	7.53378	9.7807	0.122005	1.90124	3.46696	0.4443	100
[20346]	Andean Arc	ANDEAN ARC / SOUTHERN ANDEAN VOLCANIC ZONE / CHILE / SAN JORGE		-39.27	-71.67	s_140194-7A [20346]	1344	36.8698	BASALT [20346]				Quaternary					VOL					WR [20346]	51.2318	0.787561	16.357	8.63288	9.82431	9.92528	0.161551	0.403877	2.55452	0.121163	100
[20346]	Andean Arc	ANDEAN ARC / SOUTHERN ANDEAN VOLCANIC ZONE / CHILE / SAN JORGE		-39.27	-71.67	s_140194-3 [20346]	1344	36.8698	BASALT [20346]				Quaternary					VOL					WR [20346]	51.2955	0.789474	16.1842	8.6336	9.82794	10.0101	0.161943	0.404858	2.58097	0.111336	100
[21041]	Andean Arc	ANDEAN ARC / SOUTHERN ANDEAN VOLCANIC ZONE / CHILE / SAN JORGE		-39.34	-71.66	s_SJ-L-6 [21041]	754	32.2737	BASALT [21041]				Holocene					VOL					WR [21041]	52.4425	0.583034	14.703	9.1983	9.52391	10.1141	0.158732	0.427355	2.68623	0.162802	100
[21041]	Andean Arc	ANDEAN ARC / SOUTHERN ANDEAN VOLCANIC ZONE / CHILE / SAN JORGE		-39.34	-71.66	s_SJ-T-8 [21041]	754	32.2737	BASALT [21041]				Holocene					VOL					WR [21041]	51.3324	0.788195	16.0233	8.64021	9.78759	10.1667	0.158637	0.41904	2.54417	0.13968	100
[20346]	Andean Arc	ANDEAN ARC / SOUTHERN ANDEAN VOLCANIC ZONE / CHILE / SAN JORGE		-39.27	-71.67	s_140194-2 [20346]	1344	36.8698	BASALT [20346]				Quaternary					VOL					WR [20346]	51.1073	0.775116	16.1264	8.6672	9.70405	10.3684	0.161063	0.412724	2.56694	0.110731	100
[21041]	Andean Arc	ANDEAN ARC / SOUTHERN ANDEAN VOLCANIC ZONE / CHILE / SAN JORGE		-39.34	-71.66	s_SJ-T-7 [21041]	754	32.2737	BASALT [21041]				Holocene					VOL					WR [21041]	51.3285	0.775279	15.8057	8.6131	9.87355	10.3937	0.159057	0.400144	2.52091	0.130047	100
[21041]	Andean Arc	ANDEAN ARC / SOUTHERN ANDEAN VOLCANIC ZONE / CHILE / SAN JORGE		-39.34	-71.66	s_SJ-L-4 [21041]	754	32.2737	ANDESITE, BASALTIC [21041]				Holocene					VOL					WR [21041]	52.7718	0.568124	14.3601	9.16493	9.39785	10.4207	0.156968	0.425334	2.59251	0.141778	100
[20346]	Andean Arc	ANDEAN ARC / SOUTHERN ANDEAN VOLCANIC ZONE / CHILE / SAN JORGE		-39.27	-71.67	s_120194-3 [20346]	1344	36.8698	BASALT [20346]				Quaternary					VOL					WR [20346]	51.1588	0.775897	16.052	8.63563	9.7239	10.4393	0.161225	0.423216	2.50907	0.120919	100
[5]	Andean Arc	ANDEAN ARC / CENTRAL ANDEAN VOLCANIC ZONE	Pasto Ventura	-26.8996	-67.275	P07-SUR101	4028	57.7781		0.21			QUATERNARY					VOL					WR	48.3127	1.30108	15.4503	9.33116	10.2257	10.4696	0.162635	1.43322	2.85627	0.45741	100
[25100]	Andean Arc	ANDEAN ARC / NORTHERN ANDEAN VOLCANIC ZONE / COLOMBIA / PIJAOS VOLCANIC FIELD	GUACHARACOS CONES	4.5	-75	s_G2-IV [25100]	584	30.9494	ANDESITE, BASALTIC [25100]				QUATERNARY [25100]					VOL					WR [25100]	53.3588	0.95356	14.3135	7.33429	8.13569	10.4993	0.131875	1.69409	3.15486	0.42403	100
[20346]	Andean Arc	ANDEAN ARC / SOUTHERN ANDEAN VOLCANIC ZONE / CHILE / SAN JORGE		-39.27	-71.67	s_140194-1 [20346]	1344	36.8698	BASALT [20346]				Quaternary					VOL					WR [20346]	50.9041	0.757652	15.8602	8.59683	10.102	10.5061	0.161632	0.424285	2.56592	0.121224	100
[25100]	Andean Arc	ANDEAN ARC / NORTHERN ANDEAN VOLCANIC ZONE / COLOMBIA / PIJAOS VOLCANIC FIELD	GUACHARACOS CONES	4.5	-75	s_G2-III [25100]	584	30.9494	ANDESITE, BASALTIC [25100]				QUATERNARY [25100]					VOL					WR [25100]	53.1221	0.958154	14.3219	7.44334	8.20987	10.58	0.141202	1.65408	3.14678	0.422596	100
[25100]	Andean Arc	ANDEAN ARC / NORTHERN ANDEAN VOLCANIC ZONE / COLOMBIA / PIJAOS VOLCANIC FIELD	GUACHARACOS CONES	4.5	-75	s_G3-II [25100]	584	30.9494	BASALT [25100]				QUATERNARY [25100]					VOL					WR [25100]	53.1891	0.973221	14.7008	7.66284	7.42721	10.6337	0.143422	1.77229	3.06309	0.434364	100
[21041][23433]	Andean Arc	ANDEAN ARC / SOUTHERN ANDEAN VOLCANIC ZONE / CHILE / SAN JORGE		-39.34	-71.66	s_SJ-L-3 [21041]	754	32.2737	BASALT [21041]				Holocene					VOL					WR [21041]	52.1429	0.577906	14.5992	9.3152	9.35561	10.6589	0.157611	0.424337	2.62685	0.141446	100
[21041]	Andean Arc	ANDEAN ARC / SOUTHERN ANDEAN VOLCANIC ZONE / CHILE / SAN JORGE		-39.34	-71.66	s_SJ-B-2C [21041]	754	32.2737	BASALT [21041]				Holocene					VOL					WR [21041]	51.4082	0.708413	14.6866	8.97458	10.3365	10.8345	0.164653	0.396386	2.39864	0.0914736	100
[25100]	Andean Arc	ANDEAN ARC / NORTHERN ANDEAN VOLCANIC ZONE / COLOMBIA / PIJAOS VOLCANIC FIELD	EL TABOR CRATER	4.5	-75	s_T-II [25100]	584	30.9494	ANDESITE, BASALTIC [25100]				QUATERNARY [25100]					VOL					WR [25100]	53.1362	0.953753	14.1845	7.50827	8.05617	10.8464	0.142048	1.76546	2.96272	0.444408	100
[21041]	Andean Arc	ANDEAN ARC / SOUTHERN ANDEAN VOLCANIC ZONE / CHILE / SAN JORGE		-39.34	-71.66	s_SJ-T-6 [21041]	754	32.2737	BASALT [21041]				Holocene					VOL					WR [21041]	51.2154	0.749568	15.4567	8.61851	9.87285	10.9451	0.167919	0.394509	2.44798	0.131503	100
[21041]	Andean Arc	ANDEAN ARC / SOUTHERN ANDEAN VOLCANIC ZONE / CHILE / SAN JORGE		-39.34	-71.66	s_SJ-T-CL [21041]	754	32.2737	BASALT [21041]				Holocene					VOL					WR [21041]	50.5053	0.738487	14.7395	9.97411	10.0749	10.9514	0.175302	0.392919	2.35752	0.0906737	100
[21041]	Andean Arc	ANDEAN ARC / SOUTHERN ANDEAN VOLCANIC ZONE / CHILE / SAN JORGE		-39.34	-71.66	s_SJ-L-5 [21041]	754	32.2737	BASALT [21041]				Holocene					VOL					WR [21041]	52.2145	0.562779	14.3031	9.26453	9.34579	11.0016	0.158472	0.416497	2.60057	0.13206	100
[21041]	Andean Arc	ANDEAN ARC / SOUTHERN ANDEAN VOLCANIC ZONE / CHILE / SAN JORGE		-39.34	-71.66	s_SJ-B-2B [21041]	754	32.2737	BASALT [21041]				Holocene					VOL					WR [21041]	50.3401	0.761013	15.3112	9.53035	10.1266	11.0059	0.165745	0.373938	2.29416	0.0909578	100
[25100]	Andean Arc	ANDEAN ARC / NORTHERN ANDEAN VOLCANIC ZONE / COLOMBIA / PIJAOS VOLCANIC FIELD	GUACHARACOS CONES	4.5	-75	s_G2-II [25100]	584	30.9494	ANDESITE, BASALTIC [25100]				QUATERNARY [25100]					VOL					WR [25100]	52.9136	0.960411	14.295	7.4912	8.07756	11.0093	0.131425	1.67819	3.00255	0.440778	100
[21041]	Andean Arc	ANDEAN ARC / SOUTHERN ANDEAN VOLCANIC ZONE / CHILE / SAN JORGE		-39.34	-71.66	s_SJ-T-5A [21041]	754	32.2737	BASALT [21041]				Holocene					VOL					WR [21041]	51.0334	0.747903	15.478	8.74886	9.80872	11.0586	0.164979	0.389949	2.42968	0.139982	100
[21041][23433]	Andean Arc	ANDEAN ARC / SOUTHERN ANDEAN VOLCANIC ZONE / CHILE / SAN JORGE		-39.34	-71.66	s_SJ-T-3 [21041]	754	32.2737	BASALT [21041]				Holocene					VOL					WR [21041]	51.5999	0.7213	14.7956	8.68158	10.0902	11.0793	0.16484	0.359651	2.37769	0.129874	100
[21041]	Andean Arc	ANDEAN ARC / SOUTHERN ANDEAN VOLCANIC ZONE / CHILE / SAN JORGE		-39.34	-71.66	s_SJ-T-4 [21041]	754	32.2737	BASALT [21041]				Holocene					VOL					WR [21041]	51.446	0.717526	14.8202	8.71425	10.1133	11.1127	0.167889	0.369756	2.39842	0.139908	100
[20960]	Andean Arc	ANDEAN ARC / NORTHERN ANDEAN VOLCANIC ZONE / ECUADOR / SANGAY		-2.005	-78.341	s_SAN-20B [20960]	4594	62.1873	BASALT [20960]				Quaternary					VOL					WR [20960]	50.2788	1.01368	14.7998	8.70755	8.92043	11.1201	0.152053	1.31779	3.34516	0.344653	100
[21041]	Andean Arc	ANDEAN ARC / SOUTHERN ANDEAN VOLCANIC ZONE / CHILE / SAN JORGE		-39.34	-71.66	s_SJ-L-2 [21041]	754	32.2737	BASALT [21041]				Holocene					VOL					WR [21041]	51.5783	0.572525	14.6652	9.63393	9.17469	11.1545	0.159205	0.398012	2.53095	0.132671	100
[21041]	Andean Arc	ANDEAN ARC / SOUTHERN ANDEAN VOLCANIC ZONE / CHILE / SAN JORGE		-39.34	-71.66	s_SJ-T-4A [21041]	754	32.2737	BASALT [21041]				Holocene					VOL					WR [21041]	51.4626	0.716062	14.9205	8.76851	9.96694	11.1654	0.163785	0.359529	2.3669	0.109856	100
[21041]	Andean Arc	ANDEAN ARC / SOUTHERN ANDEAN VOLCANIC ZONE / CHILE / SAN JORGE		-39.34	-71.66	s_SJ-T-3A [21041]	754	32.2737	BASALT [21041]				Holocene					VOL					WR [21041]	51.6836	0.721469	14.7096	8.71567	9.96648	11.1773	0.164107	0.360234	2.37154	0.130085	100
[21041]	Andean Arc	ANDEAN ARC / SOUTHERN ANDEAN VOLCANIC ZONE / CHILE / SAN JORGE		-39.34	-71.66	s_SJ-T-5 [21041]	754	32.2737	BASALT [21041]				Holocene					VOL					WR [21041]	51.641	0.736584	14.7517	8.64859	9.88124	11.2141	0.160345	0.380819	2.4653	0.120259	100
[21041]	Andean Arc	ANDEAN ARC / SOUTHERN ANDEAN VOLCANIC ZONE / CHILE / SAN JORGE		-39.34	-71.66	s_SJ-T-1 [21041]	754	32.2737	BASALT [21041]				Holocene					VOL					WR [21041]	51.509	0.733274	14.8053	8.70139	9.91019	11.2688	0.164837	0.369634	2.39763	0.139862	100
[21041]	Andean Arc	ANDEAN ARC / SOUTHERN ANDEAN VOLCANIC ZONE / CHILE / SAN JORGE		-39.34	-71.66	s_SJ-T-2 [21041]	754	32.2737	BASALT [21041]				Holocene					VOL					WR [21041]	51.3196	0.706749	14.5165	9.05522	9.89851	11.5248	0.167652	0.351367	2.3391	0.120469	100
[21041]	Andean Arc	ANDEAN ARC / SOUTHERN ANDEAN VOLCANIC ZONE / CHILE / SAN JORGE		-39.34	-71.66	s_SJ-L-1 [21041]	754	32.2737	BASALT [21041]				Holocene					VOL					WR [21041]	51.4608	0.582479	14.4252	9.62357	9.08667	11.5989	0.163094	0.415333	2.51226	0.131691	100
[21041][23433]	Andean Arc	ANDEAN ARC / SOUTHERN ANDEAN VOLCANIC ZONE / CHILE / SAN JORGE		-39.34	-71.66	s_SJ-B-2A [21041]	754	32.2737	BASALT [21041]				Holocene					VOL					WR [21041]	51.6409	0.532232	14.0045	9.50414	9.22672	12.0831	0.162341	0.369891	2.37347	0.102747	100
[17460]	Andean Arc	ANDEAN ARC / SOUTHERN ANDEAN VOLCANIC ZONE / CHILE / APAGADO		-41.879	-72.61	s_21-5B [17460]	853	33.0449	BASALT [17460]				Quaternary					VOL					WR [17460]	51.1917	0.757423	15.2696	8.26096	9.37184	12.1087	0.161584	0.515047	2.23187	0.131287	100
[17460]	Andean Arc	ANDEAN ARC / SOUTHERN ANDEAN VOLCANIC ZONE / CHILE / APAGADO		-41.879	-72.61	s_21-5C [17460]	853	33.0449	BASALT [17460]				Quaternary					VOL					WR [17460]	50.4455	0.779668	15.6845	8.48522	9.24463	12.3937	0.151883	0.475901	2.20737	0.131632	100
[15990]	Andean Arc	ANDEAN ARC / SOUTHERN ANDEAN VOLCANIC ZONE / CHILE / QUIZAPU	PERIPHERAL CONES	-35.58	-70.85	s_CLHE-TF-04 [15990]	2079	42.5954	NOT GIVEN [15990]				HOLOCENE [15990]					VOL					WR [15990]	51.2588	0.636879	13.9218	8.09036	9.21485	13.5934	0.149269	0.646831	2.36839	0.119415	100
[17460]	Andean Arc	ANDEAN ARC / SOUTHERN ANDEAN VOLCANIC ZONE / CHILE / APAGADO		-41.913	-72.475	s_15-6A [17460]	339	29.0408	BASALT [17460]				Quaternary					VOL					WR [17460]	49.3701	0.70675	15.4461	8.74731	9.23896	13.7663	0.163884	0.430196	2.00758	0.122913	100
[3216]	Andean Arc	ANDEAN ARC / SOUTHERN ANDEAN VOLCANIC ZONE / CHILE / PUYEHUE		-40.59	-72.12	s_II-B1 [3216]	1951	41.5983	BASALT [3216]				Quaternary					VOL					WR [3216]	48.8295	0.706357	14.773	9.78809	8.62765	14.4501	0.171544	0.312815	2.20989	0.131181	100			0.17			0.12
[17460]	Andean Arc	ANDEAN ARC / SOUTHERN ANDEAN VOLCANIC ZONE / CHILE / APAGADO		-41.913	-72.475	s_15-6B [17460]	339	29.0408	BASALT [17460]				Quaternary					VOL					WR [17460]	49.8478	0.669507	14.2118	8.62244	8.71374	15.2668	0.152161	0.446338	1.94766	0.121729	100
[11951]	Andean Arc	ANDEAN ARC / SOUTHERN ANDEAN VOLCANIC ZONE / CHILE / PUYEHUE		-40.611	-72.1177	s_PU-02-03 [11951]	1420	37.4618	BASALT [11951]				Quaternary					VOL					WR [11951]	47.7813	0.673534	13.8867	10.8261	7.93384	16.1747	0.168384	0.297147	2.13946	0.118859	100
[15465]	Banda Arc	BANDA ARC / BANDA ARC / ATAURO		-8.27583	125.507	s_A05-002 [15465]	1	26.4078	ANDESITE, BASALTIC [15465]				PLIOCENE [15465]					VOL					WR [15465]	54.3678	0.468425	13.7982	7.02786	13.1057	8.49274	0.142564	0.682271	1.8737	0.0407326	100			0.9	0.33		0.03
[15465]	Banda Arc	BANDA ARC / BANDA ARC / ATAURO		-8.28393	125.541	s_A05-022 [15465]	586	30.9649	ANDESITE, BASALTIC [15465]				PLIOCENE [15465]					VOL					WR [15465]	54.4209	0.450098	13.6768	7.01383	13.4723	8.54163	0.132984	0.531934	1.73902	0.020459	100			1.05	0.61		0.19
[15465]	Banda Arc	BANDA ARC / BANDA ARC / ATAURO		-8.26242	125.502	s_A05-001 [15465]	65	26.9063	ANDESITE, BASALTIC [15465]				PLIOCENE [15465]					VOL					WR [15465]	54.4367	0.417334	11.6141	6.46623	14.7797	9.80227	0.132326	0.620912	1.71005	0.0203578	100			0.78	0.28		0.02
[2703][6900]	Bismarck-New Britain Arc	BISMARCK ARC - NEW BRITAIN ARC / BISMARCK ARC - NEW BRITAIN ARC / WITU ISLANDS / UNEA		-4.9	149.16	s_H1/3 [2703]	121	27.3426	ANDESITE [2703]				QUATERNARY [2703]					VOL					WR [2703]	54.2235	0.585654	15.4492	8.19364	10.2994	7.01775	0.151462	1.13092	2.77681	0.171657	100			0.3	0.02		0.05
[2496][2703][4590]	Bismarck-New Britain Arc	BISMARCK ARC - NEW BRITAIN ARC / BISMARCK ARC - NEW BRITAIN ARC / NEW BRITAIN / BANGUM		-5.25	150	s_GS2/1 [2496]	18	26.5402	NOT GIVEN [2496] / ANDESITE [2703]				QUATERNARY [2703]					VOL					WR [2496]	52.0722	0.531975	15.9592	9.7484	11.9694	7.0589	0.184145	0.634278	1.72892	0.112533	100			0.82	0.48		0.05
[2703]	Bismarck-New Britain Arc	BISMARCK ARC - NEW BRITAIN ARC / BISMARCK ARC - NEW BRITAIN ARC / NEW BRITAIN / SULU		-5.45	150.98	s_3039B [2703]	15	26.5168	ANDESITE [2703]				QUATERNARY [2703]					VOL					WR [2703]	55.5524	0.383817	15.8577	8.27793	10.1004	7.12081	0.161607	0.363616	2.12109	0.0606026	100			0.38	0.19		0.1
[22487]	Bismarck-New Britain Arc	BISMARCK ARC - NEW BRITAIN ARC / BISMARCK ARC - NEW BRITAIN ARC / NEW BRITAIN / RABAUL / TALILI PYROCLASTIC SUBGROUP	ADELAIDE STREET GULLY	-4.22	152.18	s_RP99009 [22487]	3	26.4234	BASALT [22487]	3380 [22487]	4100 [22487]		QUATERNARY					VOL					WR [22487]	49.3027	0.772162	18.0473	9.06888	12.7326	7.30739	0.169916	0.602246	1.89522	0.101547	100
[4046]	Bismarck-New Britain Arc	BISMARCK ARC - NEW BRITAIN ARC / BISMARCK ARC - NEW BRITAIN ARC / WITU ISLANDS / WAMBU		-4.6333	149.3	s_3 [4046]	30	26.6337	BASALT [4046]				Quaternary					VOL					WR [4046]	49.1011	1.92969	16.0639	11.123	11.1134	7.42578	0.191959	0.16165	2.67732	0.212165	100			0.52	0.25		0.3
[2496][2703][6900][4590]	Bismarck-New Britain Arc	BISMARCK ARC - NEW BRITAIN ARC / BISMARCK ARC - NEW BRITAIN ARC / NEW BRITAIN / GARUA	GARUA HARBOUR, WILLAUMEZ PENINSULA	-5.25	150	s_GS3/1 [2496]	18	26.5402	NOT GIVEN [2496] / ANDESITE [2703]				QUATERNARY [2703]					VOL					WR [2496]	58.2301	0.509896	13.4612	7.13782	9.22911	7.49546	0.142771	1.28494	2.39651	0.112177	100			0.45	0.79		0.1
[2703]	Bismarck-New Britain Arc	BISMARCK ARC - NEW BRITAIN ARC / BISMARCK ARC - NEW BRITAIN ARC / NEW BRITAIN / SULU		-5.45	150.98	s_2651A [2703]	15	26.5168	ANDESITE [2703]				QUATERNARY [2703]					VOL					WR [2703]	53.6651	0.37422	16.8298	7.3351	11.2266	7.80804	0.141597	0.353992	2.20486	0.0606843	100
[4046]	Bismarck-New Britain Arc	BISMARCK ARC - NEW BRITAIN ARC / BISMARCK ARC - NEW BRITAIN ARC / WITU ISLANDS / GAROVE		-4.9	149.16	s_9 [4046]	121	27.3426	BASALT [4046]				Quaternary					VOL					WR [4046]	49.9976	0.85509	16.5988	9.09886	12.9773	7.99761	0.181078	0.201198	2.01198	0.0804791	100			0.01	0.33		0.05
[2703][6900][4590]	Bismarck-New Britain Arc	BISMARCK ARC - NEW BRITAIN ARC / BISMARCK ARC - NEW BRITAIN ARC / NEW BRITAIN / SULU		-5.45	150.98	s_E0217B [2703]	15	26.5168	ANDESITE [2703] / NOT GIVEN [6900]				QUATERNARY [2703]					VOL					WR [2703]	53.8273	0.333891	15.8851	8.45312	10.8262	8.44846	0.172005	0.202358	1.81111	0.0404717	100			0.49	0.24		0.1
[4046]	Bismarck-New Britain Arc	BISMARCK ARC - NEW BRITAIN ARC / BISMARCK ARC - NEW BRITAIN ARC / WITU ISLANDS / UNEA		-4.9	149.16	s_22 [4046]	121	27.3426	BASALT [4046]				Quaternary					VOL					WR [4046]	51.1707	0.689031	15.6045	8.95668	12.1594	8.66355	0.172258	0.415445	2.07723	0.0911953	100			0.37	0.17		0
[2496][2703]	Bismarck-New Britain Arc	BISMARCK ARC - NEW BRITAIN ARC / BISMARCK ARC - NEW BRITAIN ARC / NEW BRITAIN / SULU		-5.45	150.98	s_E2/1 [2496]	15	26.5168	NOT GIVEN [2496] / ANDESITE [2703]				QUATERNARY [2703]					VOL					WR [2496]	53.7076	0.303433	14.8682	8.71724	11.0247	9.30528	0.161831	0.283204	1.59808	0.0303433	100			0.3	0.22		0.04
[2703]	Bismarck-New Britain Arc	BISMARCK ARC - NEW BRITAIN ARC / BISMARCK ARC - NEW BRITAIN ARC / NEW BRITAIN / SULU		-5.45	150.98	s_217E [2703]	15	26.5168	ANDESITE [2703]				QUATERNARY [2703]					VOL					WR [2703]	53.0254	0.290139	14.8371	8.42616	11.5155	9.75467	0.150072	0.220105	1.74083	0.0400192	100
[2703][6900][4590]	Bismarck-New Britain Arc	BISMARCK ARC - NEW BRITAIN ARC / BISMARCK ARC - NEW BRITAIN ARC / NEW BRITAIN / LIKURUANGA	WILLAUMEZ PENINSULA	-4.92	151.17	s_E0871E [2703]	544	30.6378	ANDESITE [2703]				QUATERNARY [2703]					VOL					WR [2703]	51.754	0.485194	15.8699	8.54093	11.3212	10.0577	0.17184	0.212272	1.54656	0.0404328	100			0.48	0.27		0.05
[2496][2703][6900][4590]	Bismarck-New Britain Arc	BISMARCK ARC - NEW BRITAIN ARC / BISMARCK ARC - NEW BRITAIN ARC / NEW BRITAIN / KIMBE	WILLAUMEZ PENINSULA	-5.25	150	s_GN2/1 [2496]	18	26.5402	NOT GIVEN [2496] / BASALT [2703]				QUATERNARY [2703]					VOL					WR [2496]	49.6696	0.524964	15.446	9.08035	13.1241	10.1964	0.181718	0.191814	1.52441	0.0605727	100			0.6	0.23		0.05
[4046]	Bismarck-New Britain Arc	BISMARCK ARC - NEW BRITAIN ARC / BISMARCK ARC - NEW BRITAIN ARC / WITU ISLANDS / WAMBU		-4.6333	149.3	s_4 [4046]	30	26.6337	BASALT [4046]				Quaternary					VOL					WR [4046]	49.8395	1.11536	15.9768	8.9626	10.8521	10.3497	0.180869	0.241159	2.36135	0.120579	100			0.18	0.12		0
[2703][6900][4590]	Bismarck-New Britain Arc	BISMARCK ARC - NEW BRITAIN ARC / BISMARCK ARC - NEW BRITAIN ARC / WITU ISLANDS / UNDAKA		-4.548	149.112	s_H3/3 [2703]	46	26.7583	BASALT [2703]				QUATERNARY [2703]					VOL					WR [2703]	49.7272	1.16232	14.5543	9.46002	11.5222	10.9157	0.181929	0.192036	2.17304	0.111179	100			0.28	0.2		0.05
[3208][4449]	Cascades Arc	CASCADES / HIGH CASCADES / OREGON / MOUNT MAZAMA	BALD CRATER	42.1333	-122.741	s_1141 [3208]	1209	35.8181	ANDESITE, BASALTIC [3208]				Quaternary					VOL					WR [3208]	54.0646	1.03315	17.0519	7.04699	8.70651	7.00132	0.120366	0.952901	3.7113	0.310947	100
[22652]	Cascades Arc	CASCADES / HIGH CASCADES / WASHINGTON / MOUNT ST. HELENS / CASTLE CREEK FLOWS	CAVE BASALT	46.0577	-122.256	s_MW13-1A [22652]	295	28.6981	BASALT [22652]				QUATERNARY [22652]					VOL					WR [22652]	50.1811	1.45875	17.2736	9.96982	9.86922	7.04225	0.160966	0.492958	3.38028	0.171026	100
[15780]	Cascades Arc	CASCADES / HIGH CASCADES / OREGON / SAND MOUNTAIN GROUP		44.3978	-121.955	s_08-SM-01 [15780]	1302	36.5426	BASALT [15780]				QUATERNARY [15780]					VOL					WR [15780]	52.0717	1.33553	17.0114	8.08252	9.64171	7.04843	0.142444	0.996094	3.30146	0.368737	100
[5709]	Cascades Arc	CASCADES / HIGH CASCADES / OREGON / MOUNT MAZAMA	PRE-CALDERA STAGE, RED CONE	42.93	-122.12	s_RC-7 [5709]	1882	41.0608	ANDESITE, BASALTIC [5709]	24000 [5709]	48000 [5709]		Plio-Quaternary					VOL					WR [5709]	53.6879	1.06372	17.0196	7.24536	8.59007	7.05469	0.130457	1.10386	3.70296	0.401405	100			0.29	0.22
[22656]	Cascades Arc	CASCADES / HIGH CASCADES / WASHINGTON / MOUNT ST. HELENS	CASTLE CREEK	46.2228	-122.165	s_MW13-24B [22656]	1647	39.2301	BASALT [22656]				Quaternary					VOL					WR [22656]	50.0303	2.06019	16.6027	9.39204	9.04868	7.05918	0.161584	1.38356	3.82751	0.434256	100
[22656]	Cascades Arc	CASCADES / HIGH CASCADES / WASHINGTON / MOUNT ST. HELENS	CASTLE CREEK	46.2219	-122.19	s_MW14-8 [22656]	1661	39.3392	BASALT [22656]				Quaternary					VOL					WR [22656]	51.5426	1.74857	16.9129	8.98402	8.42126	7.08472	0.140689	1.00492	3.79861	0.361773	100
[22652]	Cascades Arc	CASCADES / HIGH CASCADES / WASHINGTON / MOUNT ST. HELENS / CASTLE CREEK FLOWS	CAVE BASALT	46.0577	-122.256	s_MW13-1B [22652]	295	28.6981	BASALT [22652]				QUATERNARY [22652]					VOL					WR [22652]	50.287	1.39966	17.4001	9.7976	9.82781	7.09898	0.161112	0.493404	3.36321	0.171181	100
[3613]	Cascades Arc	CASCADES / HIGH CASCADES / CALIFORNIA / MOUNT SHASTA	GREEN BUTTE	41.3717	-122.208	s_85-49 [3613]	2537	46.1632	ANDESITE, BASALTIC [3613]				Quaternary					VOL					WR [3613]	53.89	0.83	18.09	7.07	8.57	7.1	0.14	0.54	3.59	0.18	100		0.86
[22652]	Cascades Arc	CASCADES / HIGH CASCADES / WASHINGTON / MOUNT ST. HELENS / CASTLE CREEK FLOWS	CAVE BASALT	46.0577	-122.256	s_MW13-1C [22652]	295	28.6981	BASALT [22652]				QUATERNARY [22652]					VOL					WR [22652]	50.2614	1.4076	17.3638	9.82304	9.81299	7.11844	0.160869	0.49266	3.3883	0.170923	100
[15956]	Cascades Arc	CASCADES / HIGH CASCADES / WASHINGTON / MOUNT BAKER	TARN PLATEAU	48.7169	-121.849	s_NM-TP4 [15956]	1459	37.7656	ANDESITE, BASALTIC [15956]				Quaternary				STONGLY PORPHYRITIC [15956]	VOL					WR [15956]	54.6836	0.935404	16.3848	7.05104	9.54681	7.1322	0.132905	0.963811	2.98274	0.186675	100
[22656]	Cascades Arc	CASCADES / HIGH CASCADES / WASHINGTON / MOUNT ST. HELENS	CASTLE CREEK	46.2228	-122.165	s_MW13-27 [22656]	1647	39.2301	BASALT [22656]				Quaternary					VOL					WR [22656]	49.9091	2.03999	16.6027	9.48293	9.04868	7.13997	0.161584	1.35326	3.83761	0.424157	100
[4457]	Cascades Arc	CASCADES / HIGH CASCADES / WASHINGTON / MOUNT ADAMS	TRAPPERS CREEK	46.27	-121.45	s_235 [4457]-btc	1729	39.8689	BASALT [4457]				Quaternary					VOL					WR [4457]	49.7992	1.95783	16.5964	9.38755	9.52811	7.14859	0.160643	1.34538	3.64458	0.431727	100
[3576]	Cascades Arc	CASCADES / HIGH CASCADES / WASHINGTON / MOUNT ST. HELENS / CASTLE CREEK FLOWS	NORTH FLANK OF VOLCANO	46.2	-122.18	s_DS-5 [3576]	2081	42.611	BASALT, CALC-ALKALINE [3576]	1700 [3576]	2200 [3576]		Quaternary					VOL					WR [3576]	49.3441	2.0026	16.902	10.1332	8.71132	7.16932	0.140182	1.26164	3.89506	0.440573	100
[22656]	Cascades Arc	CASCADES / HIGH CASCADES / WASHINGTON / MOUNT ST. HELENS	CASTLE CREEK	46.2278	-122.171	s_MW13-29 [22656]	1253	36.1609	BASALT [22656]				Quaternary					VOL					WR [22656]	49.8791	2.09551	16.6633	9.17792	9.10739	7.17308	0.151118	1.43059	3.84848	0.473504	100
[20728]	Cascades Arc	CASCADES / GARIBALDI VOLCANIC BELT / WASHINGTON / SILVERTHRONE VOLCANIC FIELD / KLINAKLINI RIVER FLOW		51.2854	-125.748	s_KLINAKLINI RIVER [20728]	213	28.0593	BASALT, THOLEIITIC [20728]				Quaternary					VOL					WR [20728]	47.794	1.92799	17.0983	11.3752	10.7562	7.2452	0.180623	0.517514	2.78037	0.324715	100
[17450]	Cascades Arc	CASCADES / HIGH CASCADES / OREGON / MOUNT MAZAMA	CRATER LAKE, RED CONE	42.9982	-122.163	s_80C-354 [17450]	2009	42.0501	ANDESITE, BASALTIC [17450]				Quaternary					VOL					WR [17450]	53.8704	1.0375	16.8594	6.94083	8.58247	7.26252	0.109736	1.22705	3.69112	0.418992	100
[4449]	Cascades Arc	CASCADES / HIGH CASCADES / OREGON / MOUNT MAZAMA	CRATER LAKE	42.915	-122	s_354 [4449]	2172	43.3199	ANDESITE, BASALTIC [4449]				Quaternary					VOL					WR [4449]	53.872	1.03754	16.86	6.94105	8.57962	7.26275	0.109739	1.22709	3.69123	0.419005	100
[22656]	Cascades Arc	CASCADES / HIGH CASCADES / WASHINGTON / MOUNT ST. HELENS	CASTLE CREEK	46.2228	-122.165	s_MW13-24A [22656]	1647	39.2301	BASALT [22656]				Quaternary					VOL					WR [22656]	49.9395	1.94635	16.902	9.24768	9.13675	7.27108	0.151271	1.29084	3.71117	0.403388	100
[4450][20728]	Cascades Arc	CASCADES / HIGH CASCADES / OREGON / MOUNT MAZAMA	RED CONE	42.999	-122.163	s_80C354 [4450]	2009	42.0501	ANDESITE, BASALTIC [4450] / BASALT, CALC-ALKALINE [20728]				Quaternary					VOL					WR [4450]	53.6435	1.04251	16.9028	6.97806	8.62345	7.29754	0.111336	1.23076	3.74493	0.4251	100			0.32	0.14		0.02
[22656]	Cascades Arc	CASCADES / HIGH CASCADES / WASHINGTON / MOUNT ST. HELENS	CASTLE CREEK	46.2228	-122.165	s_MW13-25 [22656]	1647	39.2301	BASALT [22656]				Quaternary					VOL					WR [22656]	49.9446	2.03444	16.7388	9.09457	9.155	7.31191	0.151073	1.33951	3.76674	0.463289	100
[15717]	Cascades Arc	CASCADES / HIGH CASCADES / OREGON / THREE SISTERS	BOAT RAMP	44.1	-121.75	s_TS-772 [15717]	2441	45.4154	BASALT [15717]				Quaternary					VOL					WR [15717]	51.702	1.22502	17.5921	8.33417	9.4889	7.33005	0.150618	0.592429	3.33367	0.251029	100
[3613]	Cascades Arc	CASCADES / HIGH CASCADES / CALIFORNIA / MOUNT SHASTA	HAYSTACK	41.5485	-122.28	s_85-36 [3613]	1070	34.7353	ANDESITE, BASALTIC [3613]				Quaternary					VOL					WR [3613]	54.25	0.65	18.13	7.17	9.28	7.34	0.14	0.57	2.33	0.14	100		1.15
[15717]	Cascades Arc	CASCADES / HIGH CASCADES / OREGON / THREE SISTERS	SE OF SPARKS LAKE	44.1	-121.75	s_TS-671 [15717]	2441	45.4154	ANDESITE, BASALTIC [15717]				Quaternary					VOL					WR [15717]	49.9649	1.49583	17.96	9.61751	9.2059	7.34866	0.160626	0.381488	3.64421	0.220861	100
[3755][4438]	Cascades Arc	CASCADES / HIGH CASCADES / WASHINGTON / MOUNT ADAMS	GOAT BUTTE	46.2073	-121.425	s_MA-226 [3755]	1879	41.0374	BASALT [3755]				QUATERNARY [4438]					VOL					WR [3755]	50.1644	1.61853	16.0954	10.4005	9.55131	7.39327	0.139873	1.13996	3.06721	0.429609	100
[15717]	Cascades Arc	CASCADES / HIGH CASCADES / OREGON / THREE SISTERS	TALAPUS AND KATSUK BUTTES	44.1	-121.75	s_TS-642 [15717]	2441	45.4154	BASALT [15717]				Quaternary					VOL					WR [15717]	51.8675	1.3755	16.998	8.6747	9.05622	7.40964	0.160643	0.682731	3.44378	0.331325	100
[15956]	Cascades Arc	CASCADES / HIGH CASCADES / WASHINGTON / MOUNT BAKER	TARN PLATEAU	48.7148	-121.848	s_NM-TP2 [15956]	1459	37.7656	ANDESITE, BASALTIC [15956]				Quaternary				STONGLY PORPHYRITIC [15956]	VOL					WR [15956]	54.5416	0.928733	16.3413	6.99329	9.5703	7.42784	0.130366	0.960061	2.92061	0.185949	100
[15717]	Cascades Arc	CASCADES / HIGH CASCADES / OREGON / THREE SISTERS	TALAPUS AND KATSUK BUTTES	44.1	-121.75	s_TS-347 [15717]	2441	45.4154	BASALT [15717]				Quaternary					VOL					WR [15717]	51.8779	1.31553	16.9211	8.78691	9.13838	7.4513	0.150633	0.662784	3.31392	0.381603	100
[15717]	Cascades Arc	CASCADES / HIGH CASCADES / OREGON / THREE SISTERS	BOAT RAMP	44.1	-121.75	s_TS-674 [15717]	2441	45.4154	BASALT [15717]				Quaternary					VOL					WR [15717]	51.6719	1.21498	17.5419	8.22372	9.46882	7.48067	0.150618	0.642635	3.35375	0.251029	100
[19246]	Cascades Arc	CASCADES / HIGH CASCADES / BRITISH COLUMBIA / MOUNT GARIBALDI VOLCANIC FIELD	CHEAKAMUS VALLEY	50.15	-123.09	s_126-41 [19246]	1498	38.0694	BASALT, TRANSITIONAL [19246]				Quaternary					VOL					WR [19246]	51.206	1.35127	16.1746	10.6781	8.76801	7.50818	0.158495	0.538476	3.37309	0.243838	100
[3613]	Cascades Arc	CASCADES / HIGH CASCADES / CALIFORNIA / MOUNT SHASTA	SARGENTS RIDGE	41.4835	-122.291	s_85-6 [3613]	1551	38.4823	ANDESITE, BASALTIC [3613]				Quaternary					VOL					WR [3613]	52.95	0.72	17.76	7.28	9.64	7.51	0.14	0.45	3.41	0.14	100		0.63
[4457]	Cascades Arc	CASCADES / HIGH CASCADES / WASHINGTON / MOUNT ADAMS	SMITH BUTTE	46.07	-121.5	s_668 [4457]-bsb	984	34.0654	BASALT [4457]				Quaternary					VOL					WR [4457]	49.6838	1.87694	16.5512	9.21409	9.50517	7.51782	0.150557	1.38512	3.57322	0.542005	100
[3613]	Cascades Arc	CASCADES / HIGH CASCADES / CALIFORNIA / MOUNT SHASTA	GREEN BUTTE	41.3702	-122.216	s_85-50 [3613]	2480	45.7192	ANDESITE, BASALTIC [3613]				Quaternary					VOL					WR [3613]	54.13	0.81	17.6	7.15	8.5	7.53	0.14	0.57	3.4	0.17	100		1.37
[5709]	Cascades Arc	CASCADES / HIGH CASCADES / OREGON / MOUNT MAZAMA	PRE-CALDERA STAGE, WILLIAMS CRATER	42.93	-122.12	s_WC-18 [5709]	1882	41.0608	BASALT [5709]	22000 [5709]	30000 [5709]		Plio-Quaternary					VOL					WR [5709]	51.8809	1.18259	16.6888	7.97227	9.61362	7.54409	0.142726	0.90733	3.63951	0.428178	100			0.45	0.33
[19246][18091]	Cascades Arc	CASCADES / HIGH CASCADES / WASHINGTON / MOUNT BAKER	LAKE SHANNON	48.6366	-121.73	s_08-MB-122 [19246]	354	29.1577	BASALT, CALC-ALKALINE [19246] / ANDESITE, BASALTIC [18091]				Quaternary					VOL					WR [19246]	52.5337	1.27739	17.6054	7.86656	8.30887	7.55683	0.147069	0.70269	3.77403	0.227491	100
[4450][3657][20728][2261]	Cascades Arc	CASCADES / HIGH CASCADES / CALIFORNIA / LASSEN VOLCANIC CENTER		40.7383	-121.835	s_LC86-1009 [4450]	1484	37.9604	ANDESITE, BASALTIC [4450] / ANDESITE [3657] / NOT GIVEN [20728]	1370000 [3657]	500000 [4450] / 1370000 [3657]		Quaternary					VOL					WR [4450]	58.2583	0.520521	16.016	5.62563	7.72773	7.57758	0.1001	0.800801	3.25325	0.12012	100			0.21	0.09
[4450][20728]	Cascades Arc	CASCADES / HIGH CASCADES / OREGON / MOUNT MAZAMA	N OF DESERT RIDGE, CRATER LAKE	43.0775	-122.158	s_88C1557 [4450]	1808	40.4843	ANDESITE, BASALTIC [4450] / BASALT, CALC-ALKALINE [20728]				Quaternary					VOL					WR [4450]	52.1143	1.12031	17.3047	7.85576	9.42258	7.59208	0.140038	0.669183	3.52096	0.260071	100			0.13	0.06
[5709]	Cascades Arc	CASCADES / HIGH CASCADES / OREGON / MOUNT MAZAMA	PRE-CALDERA STAGE, WILLIAMS CRATER	42.93	-122.12	s_WC-31 [5709]	1882	41.0608	ANDESITE, BASALTIC [5709]	22000 [5709]	30000 [5709]		Plio-Quaternary					VOL					WR [5709]	52.4707	1.20277	16.4178	7.57743	9.75243	7.6075	0.140323	0.95219	3.32765	0.551268	100			0.38	0.35
[17450]	Cascades Arc	CASCADES / HIGH CASCADES / OREGON / MOUNT MAZAMA	CRATER LAKE, WILLIAMS CRATER	42.9572	-122.196	s_81C-543 [17450]	1960	41.6684	ANDESITE, BASALTIC [17450]				Quaternary					VOL					WR [17450]	51.6568	1.25381	16.7508	7.60959	9.91008	7.65323	0.130396	0.90274	3.71126	0.421279	100
[12903][13454]	Cascades Arc	CASCADES / HIGH CASCADES / WASHINGTON / MOUNT ADAMS	STRATOVOLCANO	46.1795	-121.665	s_BSM [12903]	1082	34.8288	BASALT, CALC-ALKALINE [12903] / NOT GIVEN [13454]				QUATERNARY [12903]					VOL					WR [12903]	48.7854	1.35515	16.8239	10.3694	10.5802	7.6591	0.16061	0.903433	3.01144	0.351335	100
[19246][18091][17710]	Cascades Arc	CASCADES / HIGH CASCADES / WASHINGTON / MOUNT BAKER	TARN PLATEAU, ABOUT 7 KM S OF MOUNT BAKER SUMMIT	48.7154	-121.847	s_02-MB-5 [19246]	1459	37.7656	BASALT, CALC-ALKALINE [19246] / ANDESITE, BASALTIC [18091]				Quaternary					VOL					WR [19246]	53.8705	0.928627	16.6244	7.15648	9.59918	7.68136	0.132228	0.878158	2.93729	0.191782	100
[5709]	Cascades Arc	CASCADES / HIGH CASCADES / OREGON / MOUNT MAZAMA	PRE-CALDERA STAGE, WILLIAMS CRATER	42.93	-122.12	s_WC-13 [5709]	1882	41.0608	ANDESITE, BASALTIC [5709]	22000 [5709]	30000 [5709]		Plio-Quaternary					VOL					WR [5709]	51.9769	1.14268	16.9481	7.73587	9.59652	7.69542	0.141571	0.859541	3.49884	0.40449	100			0.45	0.45
[15717]	Cascades Arc	CASCADES / HIGH CASCADES / OREGON / THREE SISTERS	BOAT RAMP	44.1	-121.75	s_TS-773 [15717]	2441	45.4154	BASALT [15717]				Quaternary					VOL					WR [15717]	51.5912	1.28501	17.3376	8.36261	9.26614	7.71007	0.150587	0.652545	3.37316	0.271057	100
[15717]	Cascades Arc	CASCADES / HIGH CASCADES / OREGON / THREE SISTERS	SE OF SPARKS LAKE	44.1	-121.75	s_TS-770 [15717]	2441	45.4154	ANDESITE, BASALTIC [15717]				Quaternary					VOL					WR [15717]	49.9247	1.50618	17.572	9.73993	9.15755	7.78191	0.160659	0.411688	3.50437	0.240988	100
[4458][4459]	Cascades Arc	CASCADES / HIGH CASCADES / OREGON / MOUNT WASHINGTON		44.5	-121.75	s_EM91 [4458] / s_EM-91 [4459]	1205	35.7869	BASALT [4458]				Pleistocene					VOL					WR [4458]	50.2473	1.57496	17.4054	9.3892	9.18728	7.81424	0.161535	0.555275	3.30136	0.363453	100
[18114]	Cascades Arc	CASCADES / HIGH CASCADES / WASHINGTON / MOUNT RAINIER		46.6887	-121.467	s_00WP830 [18114]	1219	35.896	BASALT [18114]				QUATERNARY [18114]					VOL					WR [18114]	50.92	1.28	16.8	9.42	9.62	7.85	0.16	0.57	3.15	0.23	100
[15956]	Cascades Arc	CASCADES / HIGH CASCADES / WASHINGTON / MOUNT BAKER	TARN PLATEAU	48.7159	-121.847	s_NM-TP3 [15956]	1459	37.7656	ANDESITE, BASALTIC [15956]				Quaternary				STONGLY PORPHYRITIC [15956]	VOL					WR [15956]	54.2033	0.915186	16.0183	7.09901	9.86985	7.87768	0.135508	0.86968	2.83151	0.180003	100
[12903][13454][14784]	Cascades Arc	CASCADES / HIGH CASCADES / WASHINGTON / MOUNT ADAMS	STRATOVOLCANO, SMITH BUTTE	46.0725	-121.486	s_BSB [12903]	1028	34.4081	BASALT [12903]				QUATERNARY [12903]					VOL					WR [12903]	49.2774	1.94701	16.4793	9.31353	9.35367	7.89843	0.150542	1.43517	3.59293	0.551987	100
[4457]	Cascades Arc	CASCADES / HIGH CASCADES / WASHINGTON / MOUNT ADAMS	TRAPPERS CREEK	46.27	-121.45	s_91 [4457]-btc	1729	39.8689	BASALT [4457]				Quaternary					VOL					WR [4457]	49.8192	1.77782	16.3821	9.31097	9.72278	7.90478	0.150663	1.19526	3.36481	0.371635	100
[15717]	Cascades Arc	CASCADES / HIGH CASCADES / OREGON / THREE SISTERS	SPARKS LAKE	44.1	-121.75	s_TS-769 [15717]	2441	45.4154	BASALT [15717]				Quaternary					VOL					WR [15717]	51.3052	1.21486	17.8112	8.31325	9.12651	7.91165	0.140562	0.562249	3.39357	0.220884	100
[3613]	Cascades Arc	CASCADES / HIGH CASCADES / CALIFORNIA / MOUNT SHASTA	SARGENTS RIDGE	41.4722	-122.288	s_85-47 [3613]	1581	38.716	ANDESITE, BASALTIC [3613]				Quaternary					VOL					WR [3613]	53.12	0.7	17.32	7.34	9.47	7.94	0.14	0.43	3.4	0.14	100		1.22
[15956]	Cascades Arc	CASCADES / HIGH CASCADES / WASHINGTON / MOUNT BAKER	LAKE SHANNON	48.719	-121.845	s_NM-TP6 [15956]	1459	37.7656	ANDESITE, BASALTIC [15956]				Quaternary				PORPHYRITIC [15956]	VOL					WR [15956]	54.4098	0.903465	15.8889	7.00564	9.75137	7.95453	0.133249	0.918607	2.85677	0.177665	100
[15717]	Cascades Arc	CASCADES / HIGH CASCADES / OREGON / THREE SISTERS	BOAT RAMP	44.1	-121.75	s_TS-672 [15717]	2441	45.4154	BASALT [15717]				Quaternary					VOL					WR [15717]	50.9538	1.36546	17.5904	8.6747	9.10643	7.96185	0.150602	0.61245	3.32329	0.261044	100
[4457]	Cascades Arc	CASCADES / HIGH CASCADES / WASHINGTON / MOUNT ADAMS	SMITH BUTTE	46.07	-121.5	s_669 [4457]-bsb	984	34.0654	BASALT [4457]				Quaternary					VOL					WR [4457]	48.9812	1.89702	16.1196	9.61558	9.86651	7.97952	0.150557	1.46542	3.4327	0.49182	100
[17450]	Cascades Arc	CASCADES / HIGH CASCADES / OREGON / MOUNT MAZAMA	CRATER LAKE, VENT SW OF CASTLE POINT	42.873	-121.245	s_92C-1771 [17450]	1794	40.3753	BASALT [17450]				Quaternary					VOL					WR [17450]	49.9551	1.05327	18.0561	8.12469	11.0443	7.99483	0.150467	0.371153	3.06953	0.180561	100
[15717]	Cascades Arc	CASCADES / HIGH CASCADES / OREGON / THREE SISTERS	BOAT RAMP	44.1	-121.75	s_TS-771 [15717]	2441	45.4154	BASALT [15717]				Quaternary					VOL					WR [15717]	51.4108	1.31539	17.1001	8.53499	9.13746	8.01285	0.150618	0.662717	3.40396	0.271112	100
[4457]	Cascades Arc	CASCADES / HIGH CASCADES / WASHINGTON / MOUNT ADAMS	SMITH BUTTE	46.07	-121.5	s_20 [4457]-bsb	984	34.0654	BASALT [4457]				Quaternary					VOL					WR [4457]	48.9812	1.90706	16.6215	9.29439	9.25424	8.01967	0.150557	1.45538	3.76393	0.552043	100
[3613]	Cascades Arc	CASCADES / HIGH CASCADES / CALIFORNIA / MOUNT SHASTA	HAYSTACK	41.547	-122.283	s_85-37 [3613]	1070	34.7353	ANDESITE, BASALTIC [3613]				Quaternary					VOL					WR [3613]	54	0.61	17.67	7.13	9.16	8.05	0.14	0.48	2.63	0.13	100		0.95
[3613]	Cascades Arc	CASCADES / HIGH CASCADES / CALIFORNIA / MOUNT SHASTA	WHALEBACK-DEER MOUNTAIN SADDLE	41.5668	-122.131	s_85-41D [3613]	1774	40.2195	ANDESITE [3613]				Quaternary					VOL					WR [3613]	57.8258	0.60006	14.7415	5.57056	7.88079	8.05081	0.110011	0.750075	4.32043	0.150015	100		0.46
[15673][3657][4450][20728][2261]	Cascades Arc	CASCADES / HIGH CASCADES / CALIFORNIA / LASSEN VOLCANIC CENTER	SOUTHERNMOST CASCADES, POISON LAKE CHAIN, ROBBERS SPRING	40.645	-121.166	s_LC85-671 [15673]	1723	39.8222	BASALT [15673] / ANDESITE, BASALTIC [3657] / BASALT, CALC-ALKALINE [20728] / NOT GIVEN [2261]	430000 [3657]	430000 [3657] / 500000 [4450]	LOWER [15673]	PLEISTOCENE [15673]					VOL					WR [15673]	51.4478	1.19227	17.0524	8.46609	9.1574	8.06532	0.150286	1.02194	3.14598	0.300571	100			0.42	0.02		0.04
[15780]	Cascades Arc	CASCADES / HIGH CASCADES / OREGON / PRE-MAZAMA GROUP		44.3228	-121.981	s_08-WIC-01 [15780]	1031	34.4315	BASALT [15780]				QUATERNARY [15780]					VOL					WR [15780]	50.0583	1.48002	17.1534	9.25387	9.60949	8.08692	0.16107	0.639214	3.2295	0.328218	100
[15717]	Cascades Arc	CASCADES / HIGH CASCADES / OREGON / THREE SISTERS	BOAT RAMP	44.1	-121.75	s_TS-673 [15717]	2441	45.4154	BASALT [15717]				Quaternary					VOL					WR [15717]	51.23	1.30535	17.311	8.4145	9.20775	8.09318	0.160659	0.652676	3.35375	0.271112	100
[12903][13454][14784]	Cascades Arc	CASCADES / HIGH CASCADES / WASHINGTON / MOUNT ADAMS	STRATOVOLCANO, RILEY CREEK	46.22	-121.626	s_BRC [12903]	1119	35.117	BASALT [12903]				QUATERNARY [12903]					VOL					WR [12903]	51.6913	1.4052	16.0695	9.1338	8.13008	8.12004	0.14052	1.14423	3.77396	0.391448	100
[4457]	Cascades Arc	CASCADES / HIGH CASCADES / WASHINGTON / MOUNT ADAMS	SMITH BUTTE	46.07	-121.5	s_303 [4457]-bsb	984	34.0654	BASALT [4457]				Quaternary					VOL					WR [4457]	48.5183	2.09945	16.223	9.52285	9.36213	8.13661	0.150678	1.5771	3.83727	0.572577	100
[4457]	Cascades Arc	CASCADES / HIGH CASCADES / WASHINGTON / MOUNT ADAMS	SMITH BUTTE	46.07	-121.5	s_667 [4457]-bsb	984	34.0654	BASALT [4457]				Quaternary					VOL					WR [4457]	48.609	2.08898	15.9787	9.78206	9.89254	8.14502	0.160691	1.46631	3.35442	0.522246	100
[4457]	Cascades Arc	CASCADES / HIGH CASCADES / WASHINGTON / MOUNT ADAMS	SMITH BUTTE	46.07	-121.5	s_21 [4457]-bsb	984	34.0654	BASALT [4457]				Quaternary					VOL					WR [4457]	48.7143	1.89835	16.5528	9.51185	9.4315	8.14584	0.150663	1.49658	3.58578	0.512254	100
[3208][4449]	Cascades Arc	CASCADES / HIGH CASCADES / OREGON / MOUNT MAZAMA	RED CONE	42.166	-122.703	s_355 [3208]	949	33.7927	ANDESITE, BASALTIC [3208]				Quaternary					VOL					WR [3208]	54.1161	0.952042	16.4352	7.04063	8.02722	8.16752	0.110236	1.15247	3.68791	0.310666	100
[15780]	Cascades Arc	CASCADES / HIGH CASCADES / OREGON / BELKNAP GROUP		44.3254	-121.992	s_08-WBB-01 [15780]	851	33.0293	ANDESITE, BASALTIC [15780]				QUATERNARY [15780]					VOL					WR [15780]	51.5176	1.3526	16.8783	8.71347	8.7426	8.16895	0.146934	0.711525	3.46202	0.305946	100
[17450]	Cascades Arc	CASCADES / HIGH CASCADES / OREGON / MOUNT MAZAMA	CRATER LAKE, RED CONE	42.995	-122.169	s_80C-355 [17450]	2009	42.0501	ANDESITE, BASALTIC [17450]				Quaternary					VOL					WR [17450]	54.1138	0.952003	16.4346	7.04034	8.02689	8.17127	0.110232	1.15242	3.68776	0.310654	100
[19246][18091][17710]	Cascades Arc	CASCADES / HIGH CASCADES / WASHINGTON / MOUNT BAKER	PARK BUTTE, 7 KM SSW OF MOUNT BAKER SUMMIT	48.7151	-121.852	s_06-MB-82 [19246]	1459	37.7656	THOLEIITE, OLIVINE [19246] / BASALT [18091]				Quaternary					VOL					WR [19246]	50.3988	1.04725	17.6924	9.37487	9.31446	8.18665	0.159101	0.422927	3.25251	0.151045	100
[4790]	Cascades Arc	CASCADES / HIGH CASCADES / OREGON / THREE SISTERS		44.17	-121.5	s_PHA97057 [4790]	1150	35.3585	BASALT [4790]	370000 [4790]	400000		Plio-Quaternary					VOL					WR [4790]	52.5055	1.14793	16.3206	8.34498	8.68437	8.20523	0.139748	1.15792	3.19425	0.299461	100
[4790]	Cascades Arc	CASCADES / HIGH CASCADES / OREGON / THREE SISTERS		44.17	-121.5	s_PHA97058 [4790]	1150	35.3585	BASALT [4790]	370000 [4790]	400000 [4790]		Plio-Quaternary					VOL					WR [4790]	52.6697	1.12619	15.8874	8.29563	8.94922	8.23529	0.140774	1.19658	3.20764	0.291604	100
[15956]	Cascades Arc	CASCADES / HIGH CASCADES / WASHINGTON / MOUNT BAKER	PARK BUTTE	48.7163	-121.853	s_NM-PB2 [15956]	1459	37.7656	BASALT [15956]				Quaternary				PORPHYRITIC [15956]	VOL					WR [15956]	50.0699	1.07734	17.5169	9.78109	9.28495	8.24204	0.170106	0.455641	3.25024	0.15188	100
[18114]	Cascades Arc	CASCADES / HIGH CASCADES / WASHINGTON / MOUNT RAINIER		46.7943	-121.743	s_93RE191 [18114]	1754	40.0637	ANDESITE, BASALTIC [18114]				QUATERNARY [18114]					VOL					WR [18114]	55.48	0.93	15.69	7.99	7.93	8.26	0.15	0.69	2.7	0.18	100
[3613]	Cascades Arc	CASCADES / HIGH CASCADES / CALIFORNIA / MOUNT SHASTA	GREEN BUTTE	41.3685	-122.208	s_85-48D [3613]	2537	46.1632	ANDESITE, BASALTIC [3613]				Quaternary					VOL					WR [3613]	53.9354	0.660066	17.1517	7.12071	9.28093	8.26083	0.140014	0.470047	2.84028	0.140014	100		0.66
[4450][20728]	Cascades Arc	CASCADES / HIGH CASCADES / CALIFORNIA / LASSEN VOLCANIC CENTER		40.5313	-121.049	s_LC86-855 [4450]	1764	40.1416	ANDESITE, BASALTIC [4450] / BASALT, CALC-ALKALINE [20728]				Quaternary					VOL					WR [4450]	49.9378	1.35185	16.8477	9.1737	9.87659	8.26244	0.151327	0.837341	3.27875	0.282477	100			0.2	0.13		0.04
[12903][14784]	Cascades Arc	CASCADES / HIGH CASCADES / WASHINGTON / MOUNT ADAMS	STRATOVOLCANO	46	-121.458	s_BIC [12903]	799	32.6242	THOLEIITE [12903]				QUATERNARY [12903]					VOL					WR [12903]	48.2121	1.08477	17.5874	11.3901	10.0944	8.26637	0.170751	0.150663	2.92286	0.12053	100
[4450][20728]	Cascades Arc	CASCADES / HIGH CASCADES / OREGON / MOUNT MAZAMA	NW OF RED CONE	43.0145	-122.169	s_88C1521 [4450]	1877	41.0218	ANDESITE, BASALTIC [4450] / BASALT, CALC-ALKALINE [20728]				Quaternary					VOL					WR [4450]	53.8207	0.960369	16.3063	7.41241	8.37322	8.27318	0.120046	0.882339	3.55137	0.300115	100			0.14	0.07
[4450][20728]	Cascades Arc	CASCADES / HIGH CASCADES / OREGON / MOUNT MAZAMA	NW OF RED CONE, CRATER LAKE	43.022	-122.193	s_88C1523 [4450]	1823	40.6012	ANDESITE, BASALTIC [4450] / BASALT, CALC-ALKALINE [20728]				Quaternary					VOL					WR [4450]	52.5086	1.14674	16.0946	7.39381	8.99285	8.27865	0.120709	1.12863	3.8124	0.523074	100			0.14	0.07
[15956]	Cascades Arc	CASCADES / HIGH CASCADES / WASHINGTON / MOUNT BAKER	PARK BUTTE	48.716	-121.851	s_NM-PB5 [15956]	1459	37.7656	BASALT [15956]				Quaternary				PORPHYRITIC [15956]	VOL					WR [15956]	50.753	1.08095	17.216	9.30455	9.34522	8.29783	0.168804	0.457601	3.21337	0.162702	100
[5709]	Cascades Arc	CASCADES / HIGH CASCADES / OREGON / MOUNT MAZAMA	PRE-CALDERA STAGE, RED CONE	42.93	-122.12	s_RC-12 [5709]	1882	41.0608	ANDESITE, BASALTIC [5709]	24000 [5709]	48000 [5709]		Plio-Quaternary					VOL					WR [5709]	53.5869	0.958531	16.6885	7.10322	8.04157	8.3039	0.121078	1.27131	3.59197	0.332963	100			0.24	0.21
[15956]	Cascades Arc	CASCADES / HIGH CASCADES / WASHINGTON / MOUNT BAKER	PARK BUTTE	48.7151	-121.852	s_NM-PB8 [15956]	1459	37.7656	BASALT [15956]				Quaternary				PORPHYRITIC [15956]	VOL					WR [15956]	50.4872	1.03133	17.6333	9.06101	9.45807	8.32799	0.163913	0.427598	3.25789	0.151696	100
[4684][3613]	Cascades Arc	CASCADES / HIGH CASCADES / CALIFORNIA / MOUNT SHASTA	SARGENTS RIDGE	41.3685	-122.208	s_85-48C [4684]	2537	46.1632	ANDESITE, BASALTIC [4684]				Quaternary					VOL					WR [4684]	53.932	0.65366	16.8242	7.17015	9.38254	8.36685	0.140788	0.452534	2.93644	0.140788	100		4.5
[3613]	Cascades Arc	CASCADES / HIGH CASCADES / CALIFORNIA / MOUNT SHASTA	GREEN BUTTE	41.3685	-122.208	s_85-48A [3613]	2537	46.1632	ANDESITE, BASALTIC [3613]				Quaternary					VOL					WR [3613]	53.52	0.66	17.04	7.1	9.3	8.37	0.14	0.51	3.22	0.14	100		1.32
[4790]	Cascades Arc	CASCADES / HIGH CASCADES / OREGON / THREE SISTERS		44.17	-121.5	s_PHA97059 [4790]	1150	35.3585	BASALT [4790]	370000 [4790]	400000 [4790]		Plio-Quaternary					VOL					WR [4790]	52.17	1.18545	16.4356	8.55937	8.44886	8.39863	0.150693	1.26582	3.08419	0.301386	100
[3755][4438]	Cascades Arc	CASCADES / HIGH CASCADES / WASHINGTON / MOUNT ADAMS	FLATTOP MOUNTAIN	46.0317	-121.625	s_MA421 [3755] / s_MA-421 [4438]	1130	35.2027	BASALT [3755]				QUATERNARY [4438]					VOL					WR [3755]	49.3341	1.92977	15.5181	10.4487	9.09891	8.40899	0.149982	1.13186	3.52958	0.449946	100
[15673][3657][4450][20728][2261]	Cascades Arc	CASCADES / HIGH CASCADES / CALIFORNIA / LASSEN VOLCANIC CENTER	SOUTHERNMOST CASCADES	40.539	-121.162	s_LC82-905 [15673]	1978	41.8086	BASALT [15673] / ANDESITE, BASALTIC [3657] / BASALT, CALC-ALKALINE [20728] / NOT GIVEN [2261]			LOWER [15673]	PLEISTOCENE [15673]					VOL					WR [15673]	50.4559	0.991885	17.7638	8.44605	9.80864	8.44605	0.160305	0.651237	3.02575	0.250476	100			0.38	0.36
[15956]	Cascades Arc	CASCADES / HIGH CASCADES / WASHINGTON / MOUNT BAKER	PARK BUTTE	48.7155	-121.852	s_NM-PB6 [15956]	1459	37.7656	BASALT [15956]				Quaternary				PORPHYRITIC [15956]	VOL					WR [15956]	50.4735	1.04981	17.2447	9.46945	9.28793	8.4509	0.166396	0.443723	3.25733	0.156311	100
[4450][4449][20728]	Cascades Arc	CASCADES / HIGH CASCADES / OREGON / MOUNT MAZAMA	CONE E OF BALD CRATER	43.0353	-122.202	s_88C1530 [4450] / s_1530 [4449]	1787	40.3207	THOLEIITE, OLIVINE [4450] / BASALT, CALC-ALKALINE [4449]				Quaternary					VOL					WR [4450]	50.0895	1.18448	17.2653	8.67247	10.038	8.46202	0.15057	0.523982	3.33261	0.281063	100			0.12	0.05
[15661]	Cascades Arc	CASCADES / HIGH CASCADES / CALIFORNIA / MOUNT SHASTA	MOUNT SHASTA REGION	41.5668	-122.131	s_S17 [15661]	1774	40.2195	ANDESITE [15661]				Quaternary					VOL					WR [15661]	58.2699	0.600721	14.8178	5.52663	8.17982	8.49019	0.10012	0.740889	3.14377	0.130156	100
[4790]	Cascades Arc	CASCADES / HIGH CASCADES / OREGON / THREE SISTERS		44.17	-121.5	s_PHA97065 [4790]	1150	35.3585	BASALT [4790]	370000 [4790]	400000 [4790]		Plio-Quaternary					VOL					WR [4790]	54.3331	1.25799	15.5351	7.17851	7.59784	8.52636	0.119808	1.44768	3.64417	0.359425	100
[3613]	Cascades Arc	CASCADES / HIGH CASCADES / CALIFORNIA / MOUNT SHASTA		41.5533	-122.219	s_85-40 [3613]	1315	36.6438	BASALT [3613]				Quaternary					VOL					WR [3613]	51.3689	0.953154	17.0249	8.13222	10.5354	8.59866	0.172379	0.517136	2.55526	0.141959	100		1.08
[18114]	Cascades Arc	CASCADES / HIGH CASCADES / WASHINGTON / MOUNT RAINIER		46.3973	-121.728	s_00BL834 [18114]	656	31.5102	BASALT [18114]				QUATERNARY [18114]					VOL					WR [18114]	50.23	1.35	16.58	8.51	9.69	8.61	0.15	1.3	3.12	0.46	100
[4790]	Cascades Arc	CASCADES / HIGH CASCADES / OREGON / THREE SISTERS		44.17	-121.5	s_PHA97064 [4790]	1150	35.3585	BASALT [4790]	370000 [4790]	400000 [4790]		Plio-Quaternary					VOL					WR [4790]	53.6588	1.18284	15.8681	7.50802	7.76864	8.66079	0.130313	1.3733	3.4984	0.350842	100
[18114]	Cascades Arc	CASCADES / HIGH CASCADES / WASHINGTON / MOUNT RAINIER		46.2292	-121.993	s_01SB872 [18114]	791	32.5619	BASALT [18114]				QUATERNARY [18114]					VOL					WR [18114]	49.875	1.25013	17.0217	9.28093	10.011	8.67087	0.160016	0.490049	3.0203	0.220022	100
[15717]	Cascades Arc	CASCADES / HIGH CASCADES / OREGON / THREE SISTERS	CAYUSE CRATER	44.1	-121.75	s_TS-625 [15717]	2441	45.4154	BASALT [15717]				Quaternary					VOL					WR [15717]	51.9329	1.07441	16.6382	8.45466	9.10734	8.68561	0.150618	0.612511	3.1228	0.220906	100
[15717]	Cascades Arc	CASCADES / HIGH CASCADES / OREGON / THREE SISTERS	CAYUSE CRATER	44.1	-121.75	s_TS-627 [15717]	2441	45.4154	BASALT [15717]				Quaternary					VOL					WR [15717]	52.1137	1.05432	16.4675	8.42454	9.0973	8.69565	0.150618	0.652676	3.13284	0.210865	100
[4457]	Cascades Arc	CASCADES / HIGH CASCADES / WASHINGTON / MOUNT ADAMS	SMITH BUTTE	46.07	-121.5	s_27 [4457] -bsb'	984	34.0654	BASALT [4457]				Quaternary					VOL					WR [4457]	48.4794	1.78661	16.1799	9.62561	10.3784	8.71224	0.150557	1.17435	3.03122	0.481783	100
[15717]	Cascades Arc	CASCADES / HIGH CASCADES / OREGON / THREE SISTERS	CAYUSE CRATER	44.1	-121.75	s_TS-626 [15717]	2441	45.4154	BASALT [15717]				Quaternary					VOL					WR [15717]	51.998	1.06426	16.5361	8.39357	9.14659	8.7249	0.150602	0.64257	3.13253	0.210843	100
[12903][13454]	Cascades Arc	CASCADES / HIGH CASCADES / WASHINGTON / MOUNT ADAMS	STRATOVOLCANO	45.9475	-121.46	s_BST [12903]	585	30.9571	THOLEIITE [12903] / NOT GIVEN [13454]				QUATERNARY [12903]					VOL					WR [12903]	47.9108	1.30575	17.6878	11.1792	10.1346	8.7284	0.170751	0.12053	2.61149	0.150663	100
[3613]	Cascades Arc	CASCADES / HIGH CASCADES / CALIFORNIA / MOUNT SHASTA	SARGENTS RIDGE	41.4892	-122.308	s_85-4 [3613]	1231	35.9895	ANDESITE, BASALTIC [3613]				Quaternary					VOL					WR [3613]	52.7853	0.680068	17.2817	7.41074	9.35094	8.73087	0.150015	0.470047	3.0103	0.130013	100		0.96
[3613]	Cascades Arc	CASCADES / HIGH CASCADES / CALIFORNIA / MOUNT SHASTA	WHALEBACK-DEER MOUNTAIN SADDLE	41.5668	-122.131	s_85-41A [3613]	1774	40.2195	ANDESITE [3613]				Quaternary					VOL					WR [3613]	57.92	0.62	14.72	5.82	8.36	8.74	0.11	0.74	2.81	0.16	100		0.72
[18114]	Cascades Arc	CASCADES / HIGH CASCADES / WASHINGTON / MOUNT RAINIER		46.3392	-121.741	s_00ECR836 [18114]	1068	34.7197	BASALT [18114]				QUATERNARY [18114]					VOL					WR [18114]	49.885	1.30013	16.6617	8.58086	9.951	8.75088	0.150015	1.23012	3.05031	0.440044	100
[12903][13454][14784]	Cascades Arc	CASCADES / HIGH CASCADES / WASHINGTON / MOUNT ADAMS	STRATOVOLCANO	46.3277	-121.542	s_BSC [12903]	1269	36.2855	THOLEIITE [12903] / NOT GIVEN [13454]				QUATERNARY [12903]					VOL					WR [12903]	48.1831	1.42542	16.7838	10.9315	10.2891	8.81349	0.180687	0.301144	2.93114	0.16061	100
[4450][20728]	Cascades Arc	CASCADES / HIGH CASCADES / WASHINGTON / MOUNT ADAMS		46.3218	-121.5	s_MA-120 [4450]	1478	37.9136	THOLEIITE, OLIVINE [4450] / BASALT, THOLEIITIC [20728]				Quaternary					VOL					WR [4450]	48.2179	1.42942	16.8108	10.6902	10.318	8.83827	0.181195	0.313064	3.04004	0.161062	100			0.2	0.07		0.04
[15780]	Cascades Arc	CASCADES / HIGH CASCADES / OREGON / PRE-MAZAMA GROUP		44.0371	-121.727	s_08-CYC-01 [15780]	1685	39.5262	BASALT [15780]				QUATERNARY [15780]					VOL					WR [15780]	51.6735	1.03939	16.622	8.46874	9.35957	8.84243	0.149941	0.625264	3.01004	0.209101	100
[4684][3613][10782][8496]	Cascades Arc	CASCADES / HIGH CASCADES / CALIFORNIA / MOUNT SHASTA	MISERY HILL	41.5683	-122.131	s_85-41B [4684]	1774	40.2195	ANDESITE [4684] / NOT GIVEN [8496]				Quaternary					VOL					WR [4684]	57.8642	0.59994	14.6685	5.68943	8.12919	8.87911	0.109989	0.719928	3.17968	0.159984	100		6.5
[4450][20728]	Cascades Arc	CASCADES / HIGH CASCADES / WASHINGTON / MOUNT ADAMS		46.4218	-121.757	s_MA-696 [4450]	566	30.8091	THOLEIITE, OLIVINE [4450] / BASALT, THOLEIITIC [20728]				Quaternary					VOL					WR [4450]	47.7082	1.39609	16.9741	11.1221	10.546	8.88879	0.180789	0.160701	2.86249	0.160701	100			0.3	0.11		0.01
[4457]	Cascades Arc	CASCADES / HIGH CASCADES / WASHINGTON / MOUNT ADAMS	SMITH BUTTE	46.07	-121.5	s_305 [4457] -bsb'	984	34.0654	BASALT [4457]				Quaternary					VOL					WR [4457]	50	1.3755	16.3554	8.63454	9.34739	8.89558	0.140562	1.10442	3.7751	0.371486	100
[3613]	Cascades Arc	CASCADES / HIGH CASCADES / CALIFORNIA / MOUNT SHASTA		41.4178	-122.068	s_85-53 [3613]	1679	39.4794	BASALT [3613]				Quaternary					VOL					WR [3613]	50.1069	1.04835	17.4351	8.28499	10.8193	8.92621	0.183206	0.274809	2.7888	0.132316	100		0.56
[4457]	Cascades Arc	CASCADES / HIGH CASCADES / WASHINGTON / MOUNT ADAMS	SMITH BUTTE	46.07	-121.5	s_321 [4457] -bsb'	984	34.0654	BASALT [4457]				Quaternary					VOL					WR [4457]	49.4174	1.55685	16.0104	9.21053	9.74287	8.92929	0.150663	1.15508	3.41503	0.411812	100
[18114]	Cascades Arc	CASCADES / HIGH CASCADES / WASHINGTON / MOUNT RAINIER		47.0917	-121.852	s_97BM664 [18114]	1082	34.8288	ANDESITE, BASALTIC [18114]				QUATERNARY [18114]					VOL					WR [18114]	53.51	1.13	15.64	7.67	8.04	8.94	0.13	1.3	3.3	0.34	100
[4790]	Cascades Arc	CASCADES / HIGH CASCADES / OREGON / THREE SISTERS		44.17	-121.5	s_96PRTS1 [4790]	1150	35.3585	BASALT [4790]	370000 [4790]	400000 [4790]		Plio-Quaternary					VOL					WR [4790]	51.641	1.16491	15.8732	8.97488	8.8128	8.94449	0.141815	1.21556	2.9376	0.29376	100
[4450][20728]	Cascades Arc	CASCADES / HIGH CASCADES / CALIFORNIA / MOUNT SHASTA		41.2616	-122.219	s_75SH-317 [4450]	1377	37.1268	ANDESITE, BASALTIC [4450] / BASALT, CALC-ALKALINE [20728]				Quaternary					VOL					WR [4450]	53.0472	0.561558	16.8467	7.15442	9.64676	8.96487	0.130362	0.469302	3.06851	0.110306	100			0.22	0.1		0.05
[4457]	Cascades Arc	CASCADES / HIGH CASCADES / WASHINGTON / MOUNT ADAMS	SMITH BUTTE	46.07	-121.5	s_322 [4457]-bsb'	984	34.0654	BASALT [4457]				Quaternary					VOL					WR [4457]	49.5934	1.51591	16.0928	9.05532	9.50708	8.975	0.140548	1.11435	3.61409	0.391527	100
[4450][20728]	Cascades Arc	CASCADES / HIGH CASCADES / WASHINGTON / MOUNT ADAMS		46.0356	-121.497	s_MA-322 [4450]	754	32.2737	BASALT [4450] / BASALT, CALC-ALKALINE [20728]				Quaternary					VOL					WR [4450]	49.7682	1.52352	16.1493	8.81851	9.54737	9.00907	0.142195	1.09084	3.55487	0.396114	100			0.22	0.11		0.04
[4450][20728]	Cascades Arc	CASCADES / HIGH CASCADES / OREGON / MOUNT MAZAMA	E OF BALD CRATER	43.456	-122.202	s_88C1540 [4450]	1175	35.5532	THOLEIITE, OLIVINE [4450]				Quaternary					VOL					WR [4450]	48.9247	1.16058	17.2087	9.09119	10.9055	9.05456	0.160081	0.333168	2.9715	0.190096	100			0.16	0.08
[4790]	Cascades Arc	CASCADES / HIGH CASCADES / OREGON / THREE SISTERS		44.17	-121.5	s_PHA97062 [4790]	1150	35.3585	BASALT [4790]	370000 [4790]	400000 [4790]		Plio-Quaternary					VOL					WR [4790]	53.459	1.16302	15.6507	7.71005	7.68999	9.07359	0.130339	1.35352	3.43894	0.33086	100
[15780]	Cascades Arc	CASCADES / HIGH CASCADES / OREGON / SAND MOUNTAIN GROUP		44.4377	-121.915	s_08-LL-01 [15780]	1313	36.6283	BASALT [15780]				QUATERNARY [15780]					VOL					WR [15780]	50.0559	1.37885	16.7472	8.92806	9.42569	9.07517	0.151522	0.761652	3.15873	0.317187	100
[3613]	Cascades Arc	CASCADES / HIGH CASCADES / CALIFORNIA / MOUNT SHASTA	WHALEBACK-DEER MOUNTAIN SADDLE	41.5668	-122.131	s_85-41C [3613]	1774	40.2195	ANDESITE [3613]				Quaternary					VOL					WR [3613]	57.8016	0.60012	14.4629	5.74115	8.17163	9.14183	0.110022	0.710142	3.11062	0.15003	100		1.64
[4790]	Cascades Arc	CASCADES / HIGH CASCADES / OREGON / THREE SISTERS		44.17	-121.5	s_96PRTS11 [4790]	1150	35.3585	BASALT [4790]	370000 [4790]	400000 [4790]		Plio-Quaternary					VOL					WR [4790]	53.0618	1.26314	15.5012	8.09418	7.7304	9.16532	0.131366	1.44503	3.24373	0.363783	100
[4450][4449][20728]	Cascades Arc	CASCADES / HIGH CASCADES / OREGON / MOUNT MAZAMA	E OF BALD CRATER	43.0458	-122.205	s_84C1143 [4450] / s_1143 [4449]	1738	39.939	THOLEIITE, OLIVINE [4450]				Quaternary					VOL					WR [4450]	48.7821	1.17197	17.0287	9.19213	11.1187	9.19548	0.170287	0.25543	2.91491	0.170287	100			0.1	0.04
[3613]	Cascades Arc	CASCADES / HIGH CASCADES / CALIFORNIA / MOUNT SHASTA		41.551	-122.281	s_85-35 [3613]	1070	34.7353	BASALT [3613]				Quaternary					VOL					WR [3613]	50.0305	0.946276	17.3586	8.16036	11.1722	9.22873	0.172975	0.2849	2.51323	0.132275	100		0.69
[4790]	Cascades Arc	CASCADES / HIGH CASCADES / OREGON / THREE SISTERS		44.17	-121.5	s_PHA97061 [4790]	1150	35.3585	BASALT [4790]	370000 [4790]	400000 [4790]		Plio-Quaternary					VOL					WR [4790]	50.8869	1.17246	16.665	8.81852	8.82854	9.24942	0.150316	0.911915	3.01633	0.300631	100
[4450][20728]	Cascades Arc	CASCADES / HIGH CASCADES / CALIFORNIA / MOUNT SHASTA		41.243	-122.023	s_75SH-270 [4450]	1059	34.6496	THOLEIITE, OLIVINE [4450]				Quaternary					VOL					WR [4450]	49.2313	1.00655	17.3406	9.05771	10.8628	9.26823	0.169419	0.28303	2.67085	0.109624	100			0.21	0.09		0.03
[18114]	Cascades Arc	CASCADES / HIGH CASCADES / WASHINGTON / MOUNT RAINIER		46.6876	-121.541	s_00OHS831 [18114]	845	32.9825	BASALT [18114]				QUATERNARY [18114]					VOL					WR [18114]	50.6949	1.44986	16.0884	9.0091	8.83912	9.29907	0.149985	0.9999	3.0297	0.439956	100
[4684][3613][10782]	Cascades Arc	CASCADES / HIGH CASCADES / CALIFORNIA / MOUNT SHASTA	MISERY HILL	41.3911	-122.025	s_85-51 [4684]	1477	37.9058	THOLEIITE, OLIVINE [4684] / BASALT [3613]				Quaternary					VOL					WR [4684]	49.6266	1.06394	17.6675	8.14322	10.9974	9.38107	0.184143	0.214834	2.6087	0.112532	100		0
[4450][20728]	Cascades Arc	CASCADES / HIGH CASCADES / CALIFORNIA / LASSEN VOLCANIC CENTER		40.32	-122.066	s_LC88-1311 [4450]	203	27.9814	THOLEIITE, OLIVINE [4450]				Quaternary					VOL					WR [4450]	48.4743	0.818004	18.1779	8.83094	11.3107	9.43229	0.161581	0.158551	2.5449	0.0908893	100			0.48	0.37		0.05
[3613]	Cascades Arc	CASCADES / HIGH CASCADES / CALIFORNIA / MOUNT SHASTA		41.5895	-122.302	s_85-39 [3613]	958	33.8628	BASALT [3613]				Quaternary					VOL					WR [3613]	50.3823	0.937914	17.433	7.81935	10.8472	9.4607	0.17331	0.336426	2.47732	0.132531	100		0.95
[3613]	Cascades Arc	CASCADES / HIGH CASCADES / CALIFORNIA / MOUNT SHASTA		41.4008	-122.025	s_85-52 [3613]	1509	38.1551	BASALT [3613]				Quaternary					VOL					WR [3613]	49.7999	1.02638	17.4279	8.31366	10.8899	9.48373	0.184748	0.225803	2.52489	0.123165	100		1.08
[4450][4449][20728]	Cascades Arc	CASCADES / HIGH CASCADES / OREGON / MOUNT MAZAMA	ROGUE RIVER NEAR BYBEE CREEK, CRATER LAKE	42.934	-122.421	s_82C894 [4450] / s_894 [4449]	1110	35.0469	THOLEIITE, OLIVINE [4450]				Quaternary					VOL					WR [4450]	47.971	1.05253	17.5084	9.19616	11.4361	9.62456	0.161927	0.0839999	2.86409	0.101205	100			0.2	0.13
[4450][20728]	Cascades Arc	CASCADES / HIGH CASCADES / WASHINGTON / MOUNT ADAMS		46.3557	-121.711	s_MA-953 [4450]	719	32.001	BASALT [4450] / BASALT, CALC-ALKALINE [20728]				Quaternary					VOL					WR [4450]	49.6148	1.36316	15.6362	8.5884	9.83276	9.64232	0.140325	1.48343	3.17736	0.521206	100			0.16	0.07		0.02
[4450][20728]	Cascades Arc	CASCADES / HIGH CASCADES / WASHINGTON / MOUNT ADAMS		46.0606	-121.251	s_MA-767 [4450]	541	30.6144	THOLEIITE, OLIVINE [4450] / BASALT, THOLEIITIC [20728]				Quaternary					VOL					WR [4450]	48.3244	1.22569	16.376	10.9435	10.1471	9.66488	0.170793	0.173807	2.8633	0.110513	100			0.31	0.13		0.04
[4450][4449][20728]	Cascades Arc	CASCADES / HIGH CASCADES / OREGON / MOUNT MAZAMA	CASTLE CREEK ABOVE LITTLE CASTLE CREEK, CRATER LAKE	42.894	-122.247	s_81C621 [4450] / s_621 [4449]	1699	39.6352	THOLEIITE, OLIVINE [4450]				Quaternary					VOL					WR [4450]	47.6721	1.08391	17.463	9.7573	11.1402	9.77528	0.190688	0.107388	2.69974	0.110398	100			0.29	0.38		0.04
[4450][20728]	Cascades Arc	CASCADES / HIGH CASCADES / CALIFORNIA / LASSEN VOLCANIC CENTER		40.3907	-121.305	s_LC82-970 [4450]	1633	39.1211	THOLEIITE, OLIVINE [4450]				Quaternary					VOL					WR [4450]	48.3306	0.958623	17.375	9.25836	11.1839	9.77596	0.169756	0.171753	2.67616	0.0998565	100			0.13	0.05		0.03
[4790]	Cascades Arc	CASCADES / HIGH CASCADES / OREGON / THREE SISTERS		44.17	-121.5	s_96PRTS6 [4790]	1150	35.3585	BASALT [4790]	370000 [4790]	400000 [4790]		Plio-Quaternary					VOL					WR [4790]	51.7079	1.11475	15.903	8.61117	8.51912	9.78728	0.143179	1.04316	2.88403	0.286357	100
[4684][3613][10782][8496]	Cascades Arc	CASCADES / HIGH CASCADES / CALIFORNIA / MOUNT SHASTA	MISERY HILL	41.559	-122.256	s_85-38 [4684]	1140	35.2806	THOLEIITE, OLIVINE [4684] / BASALT [3613] / THOLEIITE [10782] / NOT GIVEN [8496]				Quaternary					VOL					WR [4684]	50.2814	0.890208	17.3437	8.04257	10.8564	9.82298	0.184181	0.306968	2.15901	0.112555	100		0
[4450][20728]	Cascades Arc	CASCADES / HIGH CASCADES / CALIFORNIA / MOUNT SHASTA		41.4803	-122.206	s_75SV-3 [4450]	1811	40.5077	ANDESITE, BASALTIC [4450] / BASALT, CALC-ALKALINE [20728]				Quaternary					VOL					WR [4450]	53.3795	0.703685	15.1795	7.07541	9.78122	9.83148	0.130684	0.701674	3.00574	0.211105	100			0.44	0.23		0.04
[3613]	Cascades Arc	CASCADES / HIGH CASCADES / CALIFORNIA / MOUNT SHASTA	SARGENTS RIDGE	41.4903	-122.303	s_82-81 [3613]	1377	37.1268	ANDESITE, BASALTIC [3613]				Quaternary					VOL					WR [3613]	52.0552	0.610061	16.7717	7.52075	9.56096	9.84098	0.140014	0.390039	3.0003	0.110011	100		0.53
[15091]	Cascades Arc	CASCADES / HIGH CASCADES / OREGON	QUARTZVILLE MINING DISTRICT, OREGON	44.6008	-122.336	s_1 [15091]	618	31.2142	BASALT [15091]				Quaternary					VOL					WR [15091]	50.5253	1.5957	13.7668	6.5907	10.2343	9.95165	0.105976	3.13891	2.90677	1.1839	100
[4450][20728][2261]	Cascades Arc	CASCADES / HIGH CASCADES / CALIFORNIA / LASSEN VOLCANIC CENTER	SOUTHERNMOST CASCADES	40.3396	-122.051	s_LC88-1312 [4450]	228	28.1761	ANDESITE, BASALTIC [4450] / BASALT, CALC-ALKALINE [20728] / NOT GIVEN [2261]		500000 [4450]		Quaternary					VOL					WR [4450]	50.9494	0.732147	16.6488	7.60004	11.0324	9.99932	0.150441	0.299879	2.48729	0.100294	100			0.18	0.05
[3613]	Cascades Arc	CASCADES / HIGH CASCADES / CALIFORNIA / MOUNT SHASTA	MISERY HILL	41.479	-122.189	s_82-94B [3613]	1866	40.9361	ANDESITE, BASALTIC [3613]				Quaternary					VOL					WR [3613]	52.9293	0.717172	15.4545	7.0303	9.63636	10	0.141414	0.757576	3.12121	0.212121	100		0.73
[4790]	Cascades Arc	CASCADES / HIGH CASCADES / OREGON / THREE SISTERS		44.17	-121.5	s_PHA97060 [4790]	1150	35.3585	BASALT [4790]	370000 [4790]	400000 [4790]		Plio-Quaternary					VOL					WR [4790]	50.6007	1.20141	16.739	9.22766	8.30893	10.0353	0.161535	0.71681	2.75618	0.252398	100
[4450][20728]	Cascades Arc	CASCADES / HIGH CASCADES / CALIFORNIA / LASSEN VOLCANIC CENTER	SOUTHERNMOST CASCADES	40.4222	-121.985	s_LC86-1046 [4450]	323	28.9162	THOLEIITE, OLIVINE [4450]				Quaternary					VOL					WR [4450]	48.2306	0.800507	17.411	9.0944	11.4072	10.1064	0.170108	0.138087	2.55162	0.0900571	100			0.11	0.05		0.02
[3613]	Cascades Arc	CASCADES / HIGH CASCADES / CALIFORNIA / MOUNT SHASTA	MISERY HILL	41.479	-122.189	s_82-94C [3613]	1866	40.9361	ANDESITE, BASALTIC [3613]				Quaternary					VOL					WR [3613]	53.5554	0.710071	15.2115	6.9707	9.46095	10.111	0.140014	0.690069	2.93029	0.220022	100		0.48
[3613]	Cascades Arc	CASCADES / HIGH CASCADES / CALIFORNIA / MOUNT SHASTA	SARGENTS RIDGE	41.4728	-122.291	s_85-46 [3613]	1581	38.716	ANDESITE, BASALTIC [3613]				Quaternary					VOL					WR [3613]	52.32	0.6	16.33	7.55	9.34	10.2	0.15	0.39	3.01	0.11	100		1.09
[4684][3613][10782][8496]	Cascades Arc	CASCADES / HIGH CASCADES / CALIFORNIA / MOUNT SHASTA	MISERY HILL	41.479	-122.189	s_82-94A [4684] / s_8294A [10782]	1866	40.9361	ANDESITE, BASALTIC [4684] / NOT GIVEN [8496]				Quaternary					VOL					WR [4684]	52.8328	0.724565	15.397	7.16514	9.67093	10.2345	0.140888	0.583677	3.02908	0.221395	100		4.5
[4450][20728]	Cascades Arc	CASCADES / HIGH CASCADES / CALIFORNIA / LASSEN VOLCANIC CENTER		40.015	-121.963	s_LC88-1398 [4450]	168	27.7087	ANDESITE, BASALTIC [4450] / BASALT, CALC-ALKALINE [20728]				Quaternary					VOL					WR [4450]	49.6765	0.853031	16.4585	9.03375	10.5374	10.3367	0.170606	0.404437	2.41859	0.110392	100			0.49	0.22		0.07
[3613]	Cascades Arc	CASCADES / HIGH CASCADES / CALIFORNIA / MOUNT SHASTA	HAYSTACK	41.544	-122.279	s_85-1B [3613]	1070	34.7353	ANDESITE, BASALTIC [3613]				Quaternary					VOL					WR [3613]	52.3952	0.560056	16.2816	7.40074	9.60096	10.401	0.150015	0.40004	2.70027	0.110011	100		0.95
[3613]	Cascades Arc	CASCADES / HIGH CASCADES / CALIFORNIA / MOUNT SHASTA	SARGENTS RIDGE	41.4887	-122.301	s_85-5 [3613]	1377	37.1268	ANDESITE, BASALTIC [3613]				Quaternary					VOL					WR [3613]	51.7452	0.60006	16.2016	7.88079	9.57096	10.6811	0.150015	0.330033	2.73027	0.110011	100		0.74
[4684][3613]	Cascades Arc	CASCADES / HIGH CASCADES / CALIFORNIA / MOUNT SHASTA	HAYSTACK	41.544	-122.279	s_85-1A [4684]	1070	34.7353	ANDESITE, BASALTIC [4684]				Quaternary					VOL					WR [4684]	52.0194	0.565428	15.7007	7.70396	10.0162	10.6826	0.161551	0.383683	2.66559	0.100969	100		3.7
[3657][4450][20728]	Cascades Arc	CASCADES / HIGH CASCADES / CALIFORNIA / LASSEN VOLCANIC CENTER	SOUTHERNMOST CASCADES	40.5347	-121.196	s_LM87-1384 [3657]	2114	42.8681	BASALT [3657] / ANDESITE, BASALTIC [4450] / BASALT, CALC-ALKALINE [20728]				Quaternary					VOL					WR [3657]	49.6847	1.32119	15.6141	8.28746	9.81884	10.7096	0.150135	0.920829	3.03273	0.460414	100			0.16	0.04		0.04
[3613]	Cascades Arc	CASCADES / HIGH CASCADES / CALIFORNIA / MOUNT SHASTA	SARGENTS RIDGE	41.477	-122.293	s_85-45 [3613]	1377	37.1268	ANDESITE, BASALTIC [3613]				Quaternary					VOL					WR [3613]	51.6	0.6	16.24	7.84	9.6	10.73	0.15	0.36	2.77	0.11	100		1.02
[4684][3613][10782][8496]	Cascades Arc	CASCADES / HIGH CASCADES / CALIFORNIA / MOUNT SHASTA	SARGENTS RIDGE	41.4775	-122.299	s_85-44 [4684]	1377	37.1268	ANDESITE, BASALTIC [4684] / NOT GIVEN [8496]				Quaternary					VOL					WR [4684]	51.8383	0.597589	16.0438	8.03201	9.77413	10.787	0.162058	0.415274	2.23843	0.111415	100		3.7
[4450][2261][4943]	Cascades Arc	CASCADES / HIGH CASCADES / CALIFORNIA / LASSEN VOLCANIC CENTER	SOUTHERNMOST CASCADES	40.6679	-121.751	s_LC86-1005 [4450]	1541	38.4044	ANDESITE, BASALTIC [4450] / NOT GIVEN [2261] / BASALT, CALC-ALKALINE [4943]		500000 [4450]		Quaternary					VOL					WR [4450]	51.1993	0.518979	15.6692	7.87417	10.679	11.0782	0.139725	0.316378	2.44519	0.079843	100			0.13	0.05
[19253]	Cascades Arc	CASCADES / ANCESTRAL CASCADES / SIERRA NEVADA	SAWTOOTH RIDGE, N FORK AMER. RIVER	39.2	-120.667	s_TOWLE #1 [19253]	967	33.9329	BASALT [19253]				Pliocene					VOL					WR [19253]	49.7544	0.667053	15.4459	8.66356	10.2092	12.1717	0.158628	0.51961	2.25741	0.152527	100
[17450]	Cascades Arc	CASCADES / HIGH CASCADES / OREGON / MOUNT MAZAMA	CRATER LAKE	42.9728	-122.15	s_82C-866 [17450]	2108	42.8213	NOT GIVEN [17450]				Quaternary					VOL					WR [17450]	52.8774	0.632121	9.78131	9.63167	8.64066	15.3515	0.160539	0.556868	2.25757	0.11037	100
[15389]	Central American Volcanic Arc	CENTRAL AMERICAN VOLCANIC ARC / CENTRAL AMERICAN VOLCANIC ARC-SOUTHEASTERN SEGMENT / COSTA RICA / CERRO CHOPO		10.47	-85.07	s_12 [15389]	227	28.1683	BASALT, THOLEIITIC [15389]				PLEISTOCENE [15389]					VOL					WR [15389]	49.7954	0.838789	18.4943	9.24714	11.293	6.99673	0.173895	0.562602	2.36293	0.23527	100
[15846]	Central American Volcanic Arc	CENTRAL AMERICAN VOLCANIC ARC / CENTRAL AMERICAN VOLCANIC ARC-NORTHWESTERN SEGMENT / NICARAGUA / NEJAPA / NEJAPA FORMATION	ALTOS DE TICOMO, WESTERN INNER WALL, SE NEJAPA	12.0958	-86.3226	s_T11-ATT [15846]	256	28.3942	BASALT [15846]				QUATERNARY [15846]					VOL					WR [15846]	50.3092	1.05423	16.4318	10.0558	12.225	7.05525	0.182463	0.446021	2.07805	0.16219	100
[18727]	Central American Volcanic Arc	CENTRAL AMERICAN VOLCANIC ARC / CENTRAL AMERICAN VOLCANIC ARC-SOUTHEASTERN SEGMENT / PANAMA / EL BARU / CUESTA UNIT	LA CUESTA	8.68	-80.62	s_PH1610078C [18727]	795	32.593	ADAKITE [18727]				QUATERNARY [18727]					VOL					WR [18727]	52.3842	1.01757	17.5168	7.8993	9.22045	7.08147	0.134984	1.06949	3.32269	0.353035	100
[15389]	Central American Volcanic Arc	CENTRAL AMERICAN VOLCANIC ARC / CENTRAL AMERICAN VOLCANIC ARC-SOUTHEASTERN SEGMENT / COSTA RICA / CERRO CHOPO		10.47	-85.07	s_1 [15389]	227	28.1683	BASALT, THOLEIITIC [15389]				PLEISTOCENE [15389]					VOL					WR [15389]	49.4258	0.840853	18.5808	9.28015	11.3413	7.08573	0.184578	0.553733	2.46103	0.246103	100
[15389]	Central American Volcanic Arc	CENTRAL AMERICAN VOLCANIC ARC / CENTRAL AMERICAN VOLCANIC ARC-SOUTHEASTERN SEGMENT / COSTA RICA / CERRO CHOPO		10.47	-85.07	s_3.1 [15389]	227	28.1683	BASALT, THOLEIITIC [15389]				PLEISTOCENE [15389]					VOL					WR [15389]	49.6291	0.834535	18.2567	9.37564	11.3126	7.0987	0.185452	0.587266	2.45209	0.267876	100
[23384]	Central American Volcanic Arc	CENTRAL AMERICAN VOLCANIC ARC / CENTRAL AMERICAN VOLCANIC ARC-NORTHWESTERN SEGMENT / NICARAGUA / NEJAPA-MIRAFLORES		12	-86.3	s_830 [23384]	874	33.2085	NOT GIVEN [23384]				PLEISTOCENE-HOLOCENE [23384]					VOL					WR [23384]	48.169	0.725255	17.1039	10.6929	13.8806	7.10146	0.191387	0.322336	1.69226	0.120876	100
[15389]	Central American Volcanic Arc	CENTRAL AMERICAN VOLCANIC ARC / CENTRAL AMERICAN VOLCANIC ARC-SOUTHEASTERN SEGMENT / COSTA RICA / CERRO CHOPO		10.47	-85.07	s_2 [15389]	227	28.1683	BASALT, THOLEIITIC [15389]				PLEISTOCENE [15389]					VOL					WR [15389]	49.4559	0.831622	18.3881	9.31211	11.4682	7.13552	0.184805	0.513347	2.44353	0.26694	100
[23384]	Central American Volcanic Arc	CENTRAL AMERICAN VOLCANIC ARC / CENTRAL AMERICAN VOLCANIC ARC-NORTHWESTERN SEGMENT / NICARAGUA / NEJAPA-MIRAFLORES		12	-86.3	s_927 [23384]	874	33.2085	NOT GIVEN [23384]				PLEISTOCENE-HOLOCENE [23384]					VOL					WR [23384]	49.3101	0.738539	16.5311	10.9808	12.6159	7.1527	0.192222	0.424913	1.93234	0.121404	100
[23384]	Central American Volcanic Arc	CENTRAL AMERICAN VOLCANIC ARC / CENTRAL AMERICAN VOLCANIC ARC-NORTHWESTERN SEGMENT / NICARAGUA / NEJAPA-MIRAFLORES		12	-86.3	s_820 [23384]	874	33.2085	NOT GIVEN [23384]				PLEISTOCENE-HOLOCENE [23384]					VOL					WR [23384]	49.3682	0.842187	17.2548	9.95613	12.6729	7.1987	0.190495	0.451172	1.93503	0.130339	100
[23384]	Central American Volcanic Arc	CENTRAL AMERICAN VOLCANIC ARC / CENTRAL AMERICAN VOLCANIC ARC-NORTHWESTERN SEGMENT / NICARAGUA / NEJAPA-MIRAFLORES		12	-86.3	s_2006-12-18-02A [23384]	874	33.2085	NOT GIVEN [23384]				PLEISTOCENE-HOLOCENE [23384]					VOL					WR [23384]	48.3364	0.75937	17.1415	10.8803	13.3042	7.20895	0.192374	0.313873	1.75161	0.111374	100
[14385]	Central American Volcanic Arc	CENTRAL AMERICAN VOLCANIC ARC / CENTRAL AMERICAN VOLCANIC ARC-NORTHWESTERN SEGMENT / NICARAGUA / NEJAPA / NEJAPA FORMATION	SOUTHERN GROUP	12.065	-86.185	s_2006-12-18-02A [14385]	164	27.6776	THOLEIITE [14385]	1000 [14385]	1000 [14385]		Quaternary					VOL					WR [14385]	48.3394	0.759417	17.1426	10.8748	13.305	7.2094	0.192386	0.313892	1.75172	0.111381	100
[15389]	Central American Volcanic Arc	CENTRAL AMERICAN VOLCANIC ARC / CENTRAL AMERICAN VOLCANIC ARC-SOUTHEASTERN SEGMENT / COSTA RICA / CERRO CHOPO		10.47	-85.07	s_4 [15389]	227	28.1683	BASALT, THOLEIITIC [15389]				PLEISTOCENE [15389]					VOL					WR [15389]	48.7269	0.841889	18.4908	9.72279	11.345	7.37166	0.195072	0.595483	2.44353	0.26694	100
[11616]	Central American Volcanic Arc	CENTRAL AMERICAN VOLCANIC ARC / CENTRAL AMERICAN VOLCANIC ARC-NORTHWESTERN SEGMENT / NICARAGUA / GRANADA	GRANADA, EASTERN NICARAGUA	11.892	-85.9926	s_P2-58 [11616]	253	28.3709	NOT GIVEN [11616]				Quaternary					VOL					WR [11616]	49.0427	1.07505	16.8834	10.4433	12.3272	7.37176	0.184294	0.337872	2.19105	0.14334	100
[23384]	Central American Volcanic Arc	CENTRAL AMERICAN VOLCANIC ARC / CENTRAL AMERICAN VOLCANIC ARC-NORTHWESTERN SEGMENT / NICARAGUA / NEJAPA-MIRAFLORES		12	-86.3	s_832 [23384]	874	33.2085	NOT GIVEN [23384]				PLEISTOCENE-HOLOCENE [23384]					VOL					WR [23384]	49.1116	0.72549	16.5855	10.6942	13.0185	7.45642	0.191449	0.372821	1.74319	0.100762	100
[18727]	Central American Volcanic Arc	CENTRAL AMERICAN VOLCANIC ARC / CENTRAL AMERICAN VOLCANIC ARC-SOUTHEASTERN SEGMENT / PANAMA / EL BARU / CUESTA UNIT	LA CUESTA	8.68	-80.62	s_PH1610078B [18727]	795	32.593	ADAKITE [18727]				QUATERNARY [18727]					VOL					WR [18727]	53.2701	1.08903	15.8423	7.28838	9.69856	7.6335	0.123287	1.36643	3.13354	0.55479	100
[23384]	Central American Volcanic Arc	CENTRAL AMERICAN VOLCANIC ARC / CENTRAL AMERICAN VOLCANIC ARC-NORTHWESTERN SEGMENT / NICARAGUA / NEJAPA-MIRAFLORES		12	-86.3	s_842 [23384]	874	33.2085	NOT GIVEN [23384]				PLEISTOCENE-HOLOCENE [23384]					VOL					WR [23384]	48.0146	0.705653	18.6091	10.3216	12.4397	7.64121	0.191534	0.40323	1.56252	0.110888	100
[23384]	Central American Volcanic Arc	CENTRAL AMERICAN VOLCANIC ARC / CENTRAL AMERICAN VOLCANIC ARC-NORTHWESTERN SEGMENT / NICARAGUA / NEJAPA-MIRAFLORES		12	-86.3	s_855 [23384]	874	33.2085	NOT GIVEN [23384]				PLEISTOCENE-HOLOCENE [23384]					VOL					WR [23384]	48.1278	0.711002	18.1956	10.4038	12.4575	7.69083	0.190268	0.420592	1.68237	0.120169	100
[23384]	Central American Volcanic Arc	CENTRAL AMERICAN VOLCANIC ARC / CENTRAL AMERICAN VOLCANIC ARC-NORTHWESTERN SEGMENT / NICARAGUA / NEJAPA-MIRAFLORES		12	-86.3	s_S14 [23384]	874	33.2085	NOT GIVEN [23384]				PLEISTOCENE-HOLOCENE [23384]					VOL					WR [23384]	49.1963	0.760768	16.889	9.7425	12.4766	7.69897	0.192728	0.557896	2.2823	0.202871	100
[23384]	Central American Volcanic Arc	CENTRAL AMERICAN VOLCANIC ARC / CENTRAL AMERICAN VOLCANIC ARC-NORTHWESTERN SEGMENT / NICARAGUA / NEJAPA-MIRAFLORES		12	-86.3	s_863 [23384]	874	33.2085	NOT GIVEN [23384]				PLEISTOCENE-HOLOCENE [23384]					VOL					WR [23384]	48.1183	1.14015	16.6684	10.9978	13.2681	7.8196	0.191706	0.121078	1.57401	0.100898	100
[23384]	Central American Volcanic Arc	CENTRAL AMERICAN VOLCANIC ARC / CENTRAL AMERICAN VOLCANIC ARC-NORTHWESTERN SEGMENT / NICARAGUA / NEJAPA-MIRAFLORES		12	-86.3	s_CO 026 [23384]	874	33.2085	NOT GIVEN [23384]				PLEISTOCENE-HOLOCENE [23384]					VOL					WR [23384]	48.4067	0.847117	16.9423	10.4274	12.3034	7.89634	0.19161	0.504237	2.3094	0.17144	100
[23384]	Central American Volcanic Arc	CENTRAL AMERICAN VOLCANIC ARC / CENTRAL AMERICAN VOLCANIC ARC-NORTHWESTERN SEGMENT / NICARAGUA / NEJAPA-MIRAFLORES		12	-86.3	s_2006-12-07-07 [23384]	874	33.2085	NOT GIVEN [23384]				PLEISTOCENE-HOLOCENE [23384]					VOL					WR [23384]	48.5234	0.692762	16.305	10.704	13.544	7.94166	0.19076	0.321281	1.66664	0.11044	100
[14385]	Central American Volcanic Arc	CENTRAL AMERICAN VOLCANIC ARC / CENTRAL AMERICAN VOLCANIC ARC-NORTHWESTERN SEGMENT / NICARAGUA / NEJAPA / NEJAPA FORMATION	SOUTHERN GROUP	12.065	-86.185	s_2006-12-07-07 [14385]	164	27.6776	THOLEIITE [14385]	1000 [14385]	1000 [14385]		Quaternary					VOL					WR [14385]	48.5241	0.692771	16.3052	10.7028	13.5442	7.94177	0.190763	0.321285	1.66667	0.110442	100
[14385]	Central American Volcanic Arc	CENTRAL AMERICAN VOLCANIC ARC / CENTRAL AMERICAN VOLCANIC ARC-NORTHWESTERN SEGMENT / NICARAGUA / NEJAPA / NEJAPA FORMATION	WESTERN/NORTHWESTERN GROUP	12.08	-86.19	s_2006-12-05-10 [14385]	160	27.6464	THOLEIITE [14385]	1000 [14385]	1000 [14385]		Quaternary					VOL					WR [14385]	48.5321	0.774181	16.6399	10.2453	13.3823	7.95295	0.180977	0.382063	1.78966	0.120652	100
[23384]	Central American Volcanic Arc	CENTRAL AMERICAN VOLCANIC ARC / CENTRAL AMERICAN VOLCANIC ARC-NORTHWESTERN SEGMENT / NICARAGUA / NEJAPA-MIRAFLORES		12	-86.3	s_2006-12-05-10 [23384]	874	33.2085	NOT GIVEN [23384]				PLEISTOCENE-HOLOCENE [23384]					VOL					WR [23384]	48.5331	0.774197	16.6402	10.2434	13.3826	7.95312	0.180981	0.382071	1.7897	0.120654	100
[23384]	Central American Volcanic Arc	CENTRAL AMERICAN VOLCANIC ARC / CENTRAL AMERICAN VOLCANIC ARC-NORTHWESTERN SEGMENT / NICARAGUA / NEJAPA-MIRAFLORES		12	-86.3	s_S13 [23384]	874	33.2085	NOT GIVEN [23384]				PLEISTOCENE-HOLOCENE [23384]					VOL					WR [23384]	49.1253	0.76538	16.8081	9.96713	12.0547	8.04656	0.201416	0.563964	2.26593	0.201416	100
[23384]	Central American Volcanic Arc	CENTRAL AMERICAN VOLCANIC ARC / CENTRAL AMERICAN VOLCANIC ARC-NORTHWESTERN SEGMENT / NICARAGUA / NEJAPA-MIRAFLORES		12	-86.3	s_834 [23384]	874	33.2085	NOT GIVEN [23384]				PLEISTOCENE-HOLOCENE [23384]					VOL					WR [23384]	48.4036	0.832988	17.0913	10.0473	12.4948	8.07898	0.190684	0.471692	2.21796	0.170612	100
[23384]	Central American Volcanic Arc	CENTRAL AMERICAN VOLCANIC ARC / CENTRAL AMERICAN VOLCANIC ARC-NORTHWESTERN SEGMENT / NICARAGUA / NEJAPA-MIRAFLORES		12	-86.3	s_424 [23384]	874	33.2085	NOT GIVEN [23384]				PLEISTOCENE-HOLOCENE [23384]					VOL					WR [23384]	48.5201	1.24205	16.327	11.9045	11.0583	8.09337	0.190314	0.270447	2.27376	0.120199	100
[23384]	Central American Volcanic Arc	CENTRAL AMERICAN VOLCANIC ARC / CENTRAL AMERICAN VOLCANIC ARC-NORTHWESTERN SEGMENT / NICARAGUA / NEJAPA-MIRAFLORES		12	-86.3	s_839 [23384]	874	33.2085	NOT GIVEN [23384]				PLEISTOCENE-HOLOCENE [23384]					VOL					WR [23384]	49.5239	1.23936	16.4542	10.1315	11.5774	8.22208	0.171293	0.342587	2.16636	0.171293	100
[14385]	Central American Volcanic Arc	CENTRAL AMERICAN VOLCANIC ARC / CENTRAL AMERICAN VOLCANIC ARC-NORTHWESTERN SEGMENT / NICARAGUA / NEJAPA / NEJAPA FORMATION	WESTERN/NORTHWESTERN GROUP	12.08	-86.19	s_2006-12-10-02 [14385]	160	27.6464	THOLEIITE [14385]	1000 [14385]	1000 [14385]		Quaternary					VOL					WR [14385]	48.514	0.727861	16.5689	9.88678	13.8597	8.23898	0.192074	0.323494	1.57703	0.111201	100
[23384]	Central American Volcanic Arc	CENTRAL AMERICAN VOLCANIC ARC / CENTRAL AMERICAN VOLCANIC ARC-NORTHWESTERN SEGMENT / NICARAGUA / NEJAPA-MIRAFLORES		12	-86.3	s_806 [23384]	874	33.2085	NOT GIVEN [23384]				PLEISTOCENE-HOLOCENE [23384]					VOL					WR [23384]	48.0265	0.664239	18.0955	10.0861	12.4293	8.43383	0.181156	0.392505	1.58008	0.110707	100
[23384]	Central American Volcanic Arc	CENTRAL AMERICAN VOLCANIC ARC / CENTRAL AMERICAN VOLCANIC ARC-NORTHWESTERN SEGMENT / NICARAGUA / NEJAPA-MIRAFLORES		12	-86.3	s_2006-12-14-01 [23384]	874	33.2085	NOT GIVEN [23384]				PLEISTOCENE-HOLOCENE [23384]					VOL					WR [23384]	48.0252	0.722939	16.3364	10.2953	13.7258	8.47445	0.180735	0.351429	1.77722	0.110449	100
[14385]	Central American Volcanic Arc	CENTRAL AMERICAN VOLCANIC ARC / CENTRAL AMERICAN VOLCANIC ARC-NORTHWESTERN SEGMENT / NICARAGUA / NEJAPA / NEJAPA FORMATION	WESTERN/NORTHWESTERN GROUP	12.08	-86.19	s_2006-12-14-01 [14385]	160	27.6464	THOLEIITE [14385]	1000 [14385]	1000 [14385]		Quaternary					VOL					WR [14385]	48.0269	0.722964	16.337	10.2922	13.7263	8.47475	0.180741	0.351441	1.77729	0.110453	100
[14385]	Central American Volcanic Arc	CENTRAL AMERICAN VOLCANIC ARC / CENTRAL AMERICAN VOLCANIC ARC-NORTHWESTERN SEGMENT / NICARAGUA / NEJAPA / NEJAPA FORMATION	WESTERN/NORTHWESTERN GROUP	12.08	-86.19	s_2006-12-07-02 [14385]	160	27.6464	THOLEIITE [14385]	1000 [14385]	1000 [14385]		Quaternary					VOL					WR [14385]	48.2532	0.726979	16.4075	9.94548	13.9943	8.49152	0.191842	0.313005	1.56502	0.111066	100
[23384]	Central American Volcanic Arc	CENTRAL AMERICAN VOLCANIC ARC / CENTRAL AMERICAN VOLCANIC ARC-NORTHWESTERN SEGMENT / NICARAGUA / NEJAPA-MIRAFLORES		12	-86.3	s_831 [23384]	874	33.2085	NOT GIVEN [23384]				PLEISTOCENE-HOLOCENE [23384]					VOL					WR [23384]	48.0626	0.673681	17.5157	10.0787	12.9809	8.52659	0.191044	0.351923	1.48813	0.130714	100
[15846]	Central American Volcanic Arc	CENTRAL AMERICAN VOLCANIC ARC / CENTRAL AMERICAN VOLCANIC ARC-NORTHWESTERN SEGMENT / NICARAGUA / NEJAPA / NEJAPA FORMATION	MOTASTEPE, NW OF NEJAPA CRATER	12.1305	-86.329	s_MO1 [15846]	174	27.7555	BASALT [15846]				QUATERNARY [15846]					VOL					WR [15846]	48.7242	0.668287	17.0717	9.75091	12.7177	8.54597	0.18226	0.465776	1.7416	0.131632	100
[23384]	Central American Volcanic Arc	CENTRAL AMERICAN VOLCANIC ARC / CENTRAL AMERICAN VOLCANIC ARC-NORTHWESTERN SEGMENT / NICARAGUA / NEJAPA-MIRAFLORES		12	-86.3	s_2006-12-05-09 [23384]	874	33.2085	NOT GIVEN [23384]				PLEISTOCENE-HOLOCENE [23384]					VOL					WR [23384]	47.6372	0.700989	16.5734	10.2134	13.8395	8.64219	0.180254	0.310438	1.80254	0.100141	100
[14385]	Central American Volcanic Arc	CENTRAL AMERICAN VOLCANIC ARC / CENTRAL AMERICAN VOLCANIC ARC-NORTHWESTERN SEGMENT / NICARAGUA / NEJAPA / NEJAPA FORMATION	WESTERN/NORTHWESTERN GROUP	12.08	-86.19	s_2006-12-05-09 [14385]	160	27.6464	THOLEIITE [14385]	1000 [14385]	1000 [14385]		Quaternary					VOL					WR [14385]	47.6415	0.701052	16.5749	10.2053	13.8408	8.64296	0.18027	0.310466	1.8027	0.10015	100
[23384]	Central American Volcanic Arc	CENTRAL AMERICAN VOLCANIC ARC / CENTRAL AMERICAN VOLCANIC ARC-NORTHWESTERN SEGMENT / NICARAGUA / NEJAPA-MIRAFLORES		12	-86.3	s_555 [23384]	874	33.2085	NOT GIVEN [23384]				PLEISTOCENE-HOLOCENE [23384]					VOL					WR [23384]	48.4679	0.801454	15.6985	10.5377	13.3342	8.6557	0.190345	0.410745	1.78324	0.120218	100
[23384]	Central American Volcanic Arc	CENTRAL AMERICAN VOLCANIC ARC / CENTRAL AMERICAN VOLCANIC ARC-NORTHWESTERN SEGMENT / NICARAGUA / NEJAPA-MIRAFLORES		12	-86.3	s_2006-12-10-01 [23384]	874	33.2085	NOT GIVEN [23384]				PLEISTOCENE-HOLOCENE [23384]					VOL					WR [23384]	48.2009	0.726342	16.1309	10.3169	13.5382	8.66567	0.181586	0.353083	1.74524	0.141233	100
[14385]	Central American Volcanic Arc	CENTRAL AMERICAN VOLCANIC ARC / CENTRAL AMERICAN VOLCANIC ARC-NORTHWESTERN SEGMENT / NICARAGUA / NEJAPA / NEJAPA FORMATION	WESTERN/NORTHWESTERN GROUP	12.08	-86.19	s_2006-12-10-01 [14385]	160	27.6464	THOLEIITE [14385]	1000 [14385]	1000 [14385]		Quaternary					VOL					WR [14385]	48.2042	0.726392	16.132	10.3107	13.5391	8.66626	0.181598	0.353107	1.74536	0.141243	100
[23384]	Central American Volcanic Arc	CENTRAL AMERICAN VOLCANIC ARC / CENTRAL AMERICAN VOLCANIC ARC-NORTHWESTERN SEGMENT / NICARAGUA / NEJAPA-MIRAFLORES		12	-86.3	s_S24 [23384]	874	33.2085	NOT GIVEN [23384]				PLEISTOCENE-HOLOCENE [23384]					VOL					WR [23384]	48.8892	0.76784	16.458	10.1223	11.8712	8.74933	0.19196	0.54557	2.20249	0.202063	100
[14385]	Central American Volcanic Arc	CENTRAL AMERICAN VOLCANIC ARC / CENTRAL AMERICAN VOLCANIC ARC-NORTHWESTERN SEGMENT / NICARAGUA / NEJAPA / NEJAPA FORMATION	WESTERN/NORTHWESTERN GROUP	12.08	-86.19	s_2006-12-07-01 [14385]	160	27.6464	THOLEIITE [14385]	1000 [14385]	1000 [14385]		Quaternary					VOL					WR [14385]	47.6863	0.701122	16.2861	10.2865	13.9022	8.76402	0.180288	0.330529	1.7528	0.110176	100
[23384]	Central American Volcanic Arc	CENTRAL AMERICAN VOLCANIC ARC / CENTRAL AMERICAN VOLCANIC ARC-NORTHWESTERN SEGMENT / NICARAGUA / NEJAPA-MIRAFLORES		12	-86.3	s_2006-12-07-01 [23384]	874	33.2085	NOT GIVEN [23384]				PLEISTOCENE-HOLOCENE [23384]					VOL					WR [23384]	47.6874	0.701138	16.2864	10.2844	13.9026	8.76422	0.180293	0.330536	1.75284	0.110179	100
[23384]	Central American Volcanic Arc	CENTRAL AMERICAN VOLCANIC ARC / CENTRAL AMERICAN VOLCANIC ARC-NORTHWESTERN SEGMENT / NICARAGUA / NEJAPA-MIRAFLORES		12	-86.3	s_S25 [23384]	874	33.2085	NOT GIVEN [23384]				PLEISTOCENE-HOLOCENE [23384]					VOL					WR [23384]	48.8229	0.764588	16.5694	10.1308	12.0624	8.77264	0.191147	0.482897	2.02213	0.181087	100
[23384]	Central American Volcanic Arc	CENTRAL AMERICAN VOLCANIC ARC / CENTRAL AMERICAN VOLCANIC ARC-NORTHWESTERN SEGMENT / NICARAGUA / NEJAPA-MIRAFLORES		12	-86.3	s_2006-12-11-01 [23384]	874	33.2085	NOT GIVEN [23384]				PLEISTOCENE-HOLOCENE [23384]					VOL					WR [23384]	48.1469	0.706559	15.8168	10.3175	13.8183	8.90264	0.181687	0.353279	1.63518	0.121124	100
[14385]	Central American Volcanic Arc	CENTRAL AMERICAN VOLCANIC ARC / CENTRAL AMERICAN VOLCANIC ARC-NORTHWESTERN SEGMENT / NICARAGUA / NEJAPA / NEJAPA FORMATION	WESTERN/NORTHWESTERN GROUP	12.08	-86.19	s_2006-12-11-01 [14385]	160	27.6464	THOLEIITE [14385]	1000 [14385]	1000 [14385]		Quaternary					VOL					WR [14385]	48.1478	0.706571	15.8171	10.3159	13.8185	8.9028	0.18169	0.353286	1.63521	0.121126	100
[23384]	Central American Volcanic Arc	CENTRAL AMERICAN VOLCANIC ARC / CENTRAL AMERICAN VOLCANIC ARC-NORTHWESTERN SEGMENT / NICARAGUA / NEJAPA-MIRAFLORES		12	-86.3	s_2006-12-10-03 B [23384]	874	33.2085	NOT GIVEN [23384]				PLEISTOCENE-HOLOCENE [23384]					VOL					WR [23384]	47.957	0.710104	16.0223	10.3169	13.722	8.9213	0.180026	0.34005	1.72025	0.110016	100
[14385]	Central American Volcanic Arc	CENTRAL AMERICAN VOLCANIC ARC / CENTRAL AMERICAN VOLCANIC ARC-NORTHWESTERN SEGMENT / NICARAGUA / NEJAPA / NEJAPA FORMATION	WESTERN/NORTHWESTERN GROUP	12.08	-86.19	s_2006-12-10-03 B [14385]	160	27.6464	THOLEIITE [14385]	1000 [14385]	1000 [14385]		Quaternary					VOL					WR [14385]	47.9596	0.710142	16.0232	10.3121	13.7227	8.92178	0.180036	0.340068	1.72034	0.110022	100
[23384]	Central American Volcanic Arc	CENTRAL AMERICAN VOLCANIC ARC / CENTRAL AMERICAN VOLCANIC ARC-NORTHWESTERN SEGMENT / NICARAGUA / NEJAPA-MIRAFLORES		12	-86.3	s_554 [23384]	874	33.2085	NOT GIVEN [23384]				PLEISTOCENE-HOLOCENE [23384]					VOL					WR [23384]	48.3915	1.1493	16.2615	11.6251	10.9385	9.06332	0.19155	0.231876	2.03647	0.110897	100
[14385]	Central American Volcanic Arc	CENTRAL AMERICAN VOLCANIC ARC / CENTRAL AMERICAN VOLCANIC ARC-NORTHWESTERN SEGMENT / NICARAGUA / NEJAPA / NEJAPA FORMATION	WESTERN/NORTHWESTERN GROUP	12.08	-86.19	s_2006-12-07-03 B [14385]	160	27.6464	THOLEIITE [14385]	1000 [14385]	1000 [14385]		Quaternary					VOL					WR [14385]	47.8841	0.701966	15.9848	10.2587	13.7886	9.06538	0.180505	0.31087	1.7148	0.110309	100
[23384]	Central American Volcanic Arc	CENTRAL AMERICAN VOLCANIC ARC / CENTRAL AMERICAN VOLCANIC ARC-NORTHWESTERN SEGMENT / NICARAGUA / NEJAPA-MIRAFLORES		12	-86.3	s_2006-12-07-03 B [23384]	874	33.2085	NOT GIVEN [23384]				PLEISTOCENE-HOLOCENE [23384]					VOL					WR [23384]	47.8838	0.702019	15.986	10.2558	13.7897	9.06608	0.180519	0.310894	1.71493	0.110317	100
[23384]	Central American Volcanic Arc	CENTRAL AMERICAN VOLCANIC ARC / CENTRAL AMERICAN VOLCANIC ARC-NORTHWESTERN SEGMENT / NICARAGUA / NEJAPA-MIRAFLORES		12	-86.3	s_557 [23384]	874	33.2085	NOT GIVEN [23384]				PLEISTOCENE-HOLOCENE [23384]					VOL					WR [23384]	48.4601	1.16554	16.2673	11.6806	10.7812	9.07309	0.190907	0.22105	2.04973	0.110525	100
[14385]	Central American Volcanic Arc	CENTRAL AMERICAN VOLCANIC ARC / CENTRAL AMERICAN VOLCANIC ARC-NORTHWESTERN SEGMENT / NICARAGUA / NEJAPA / NEJAPA FORMATION	WESTERN/NORTHWESTERN GROUP	12.08	-86.19	s_2006-11-24-03 [14385]	160	27.6464	THOLEIITE [14385]	1000 [14385]	1000 [14385]		Quaternary					VOL					WR [14385]	47.2698	0.681294	16.4513	10.3396	14.0066	9.07725	0.180343	0.290552	1.60305	0.10019	100
[23384]	Central American Volcanic Arc	CENTRAL AMERICAN VOLCANIC ARC / CENTRAL AMERICAN VOLCANIC ARC-NORTHWESTERN SEGMENT / NICARAGUA / NEJAPA-MIRAFLORES		12	-86.3	s_2006-11-24-03 [23384]	874	33.2085	NOT GIVEN [23384]				PLEISTOCENE-HOLOCENE [23384]					VOL					WR [23384]	47.2711	0.681313	16.4517	10.3372	14.007	9.07749	0.180348	0.29056	1.60309	0.100193	100
[11616]	Central American Volcanic Arc	CENTRAL AMERICAN VOLCANIC ARC / CENTRAL AMERICAN VOLCANIC ARC-NORTHWESTERN SEGMENT / NICARAGUA / NEJAPA	NEJAPA CRATER, EASTERN NICARAGUA	12.1324	-86.3247	s_P2-32D [11616]	174	27.7555	NOT GIVEN [11616]				Quaternary					VOL					WR [11616]	48.1837	1.15035	16.1857	11.5943	10.8779	9.27346	0.191726	0.232089	2.18971	0.12109	100
[23384]	Central American Volcanic Arc	CENTRAL AMERICAN VOLCANIC ARC / CENTRAL AMERICAN VOLCANIC ARC-NORTHWESTERN SEGMENT / NICARAGUA / NEJAPA-MIRAFLORES		12	-86.3	s_824 [23384]	874	33.2085	NOT GIVEN [23384]				PLEISTOCENE-HOLOCENE [23384]					VOL					WR [23384]	48.9726	1.15111	16.2367	11.6069	10.7134	9.28965	0.191852	0.171657	1.54491	0.121169	100
[23384]	Central American Volcanic Arc	CENTRAL AMERICAN VOLCANIC ARC / CENTRAL AMERICAN VOLCANIC ARC-NORTHWESTERN SEGMENT / NICARAGUA / NEJAPA-MIRAFLORES		12	-86.3	s_2006-12-14-02 [23384]	874	33.2085	NOT GIVEN [23384]				PLEISTOCENE-HOLOCENE [23384]					VOL					WR [23384]	47.8125	0.691918	15.6133	10.4017	13.698	9.47626	0.1805	0.330917	1.68467	0.110306	100
[14385]	Central American Volcanic Arc	CENTRAL AMERICAN VOLCANIC ARC / CENTRAL AMERICAN VOLCANIC ARC-NORTHWESTERN SEGMENT / NICARAGUA / NEJAPA / NEJAPA FORMATION	WESTERN/NORTHWESTERN GROUP	12.08	-86.19	s_2006-12-14-02 [14385]	160	27.6464	THOLEIITE [14385]	1000 [14385]	1000 [14385]		Quaternary					VOL					WR [14385]	47.8139	0.691937	15.6137	10.3991	13.6984	9.47653	0.180505	0.330927	1.68472	0.110309	100
[14385]	Central American Volcanic Arc	CENTRAL AMERICAN VOLCANIC ARC / CENTRAL AMERICAN VOLCANIC ARC-NORTHWESTERN SEGMENT / NICARAGUA / NEJAPA / NEJAPA FORMATION	WESTERN/NORTHWESTERN GROUP	12.08	-86.19	s_2006-11-30-02 [14385]	160	27.6464	THOLEIITE [14385]	1000 [14385]	1000 [14385]		Quaternary					VOL					WR [14385]	48.06	0.709148	15.3581	9.92807	14.4058	9.50258	0.182352	0.314051	1.43856	0.101307	100
[23384]	Central American Volcanic Arc	CENTRAL AMERICAN VOLCANIC ARC / CENTRAL AMERICAN VOLCANIC ARC-NORTHWESTERN SEGMENT / NICARAGUA / NEJAPA-MIRAFLORES		12	-86.3	s_2006-12-07-06 [23384]	874	33.2085	NOT GIVEN [23384]				PLEISTOCENE-HOLOCENE [23384]					VOL					WR [23384]	47.7088	0.682557	15.5683	10.2738	14.0225	9.53573	0.180677	0.311166	1.60602	0.110414	100
[14385]	Central American Volcanic Arc	CENTRAL AMERICAN VOLCANIC ARC / CENTRAL AMERICAN VOLCANIC ARC-NORTHWESTERN SEGMENT / NICARAGUA / NEJAPA / NEJAPA FORMATION	WESTERN/NORTHWESTERN GROUP	12.08	-86.19	s_2006-12-07-06 [14385]	160	27.6464	THOLEIITE [14385]	1000 [14385]	1000 [14385]		Quaternary					VOL					WR [14385]	47.7113	0.682594	15.5692	10.269	14.0233	9.53624	0.180687	0.311182	1.6061	0.11042	100
[14081][4519]	Central American Volcanic Arc	CENTRAL AMERICAN VOLCANIC ARC / CENTRAL AMERICAN VOLCANIC ARC-NORTHWESTERN SEGMENT / NICARAGUA / CERRO NEGRO		12.5	-86.7	s_CN5 [14081] / s_CN-5 [4519]	548	30.6689	NOT GIVEN [14081] / BASALT [4519]				Quaternary					VOL					WR [14081]	49.2695	0.654912	15.4156	10.8816	11.5869	9.66247	0.201511	0.352645	1.86398	0.110831	100			0.1
[23384]	Central American Volcanic Arc	CENTRAL AMERICAN VOLCANIC ARC / CENTRAL AMERICAN VOLCANIC ARC-NORTHWESTERN SEGMENT / NICARAGUA / NEJAPA-MIRAFLORES		12	-86.3	s_851 [23384]	874	33.2085	NOT GIVEN [23384]				PLEISTOCENE-HOLOCENE [23384]					VOL					WR [23384]	48.2978	0.881236	16.393	9.43296	12.9982	9.6936	0.160225	0.230323	1.81254	0.10014	100
[23384]	Central American Volcanic Arc	CENTRAL AMERICAN VOLCANIC ARC / CENTRAL AMERICAN VOLCANIC ARC-NORTHWESTERN SEGMENT / NICARAGUA / NEJAPA-MIRAFLORES		12	-86.3	s_2006-12-05-08 [23384]	874	33.2085	NOT GIVEN [23384]				PLEISTOCENE-HOLOCENE [23384]					VOL					WR [23384]	47.7721	0.683895	15.3373	10.4601	13.9293	9.72539	0.181031	0.341947	1.46836	0.100573	100
[14385]	Central American Volcanic Arc	CENTRAL AMERICAN VOLCANIC ARC / CENTRAL AMERICAN VOLCANIC ARC-NORTHWESTERN SEGMENT / NICARAGUA / NEJAPA / NEJAPA FORMATION	WESTERN/NORTHWESTERN GROUP	12.08	-86.19	s_2006-12-05-08 [14385]	160	27.6464	THOLEIITE [14385]	1000 [14385]	1000 [14385]		Quaternary					VOL					WR [14385]	47.7723	0.683898	15.3374	10.4596	13.9294	9.72543	0.181032	0.341949	1.46837	0.100573	100
[23384]	Central American Volcanic Arc	CENTRAL AMERICAN VOLCANIC ARC / CENTRAL AMERICAN VOLCANIC ARC-NORTHWESTERN SEGMENT / NICARAGUA / NEJAPA-MIRAFLORES		12	-86.3	s_816 [23384]	874	33.2085	NOT GIVEN [23384]				PLEISTOCENE-HOLOCENE [23384]					VOL					WR [23384]	47.6937	1.12552	16.0788	11.6169	11.3758	9.72767	0.190936	0.160788	1.93951	0.0904432	100
[14385]	Central American Volcanic Arc	CENTRAL AMERICAN VOLCANIC ARC / CENTRAL AMERICAN VOLCANIC ARC-NORTHWESTERN SEGMENT / NICARAGUA / NEJAPA / NEJAPA FORMATION	WESTERN/NORTHWESTERN GROUP	12.08	-86.19	s_2006-12-05-02 [14385]	160	27.6464	THOLEIITE [14385]	1000 [14385]	1000 [14385]		Quaternary					VOL					WR [14385]	47.2436	0.689096	15.5553	9.96149	14.8156	9.72842	0.192542	0.263478	1.45926	0.0912039	100
[14385]	Central American Volcanic Arc	CENTRAL AMERICAN VOLCANIC ARC / CENTRAL AMERICAN VOLCANIC ARC-NORTHWESTERN SEGMENT / NICARAGUA / NEJAPA / NEJAPA FORMATION	WESTERN/NORTHWESTERN GROUP	12.08	-86.19	s_2006-11-30-03 [14385]	160	27.6464	THOLEIITE [14385]	1000 [14385]	1000 [14385]		Quaternary					VOL					WR [14385]	47.9903	0.680065	15.2253	9.83557	14.6062	9.80512	0.182704	0.284206	1.28908	0.101502	100
[23384]	Central American Volcanic Arc	CENTRAL AMERICAN VOLCANIC ARC / CENTRAL AMERICAN VOLCANIC ARC-NORTHWESTERN SEGMENT / NICARAGUA / NEJAPA-MIRAFLORES		12	-86.3	s_827 [23384]	874	33.2085	NOT GIVEN [23384]				PLEISTOCENE-HOLOCENE [23384]					VOL					WR [23384]	47.6696	0.73122	15.4358	10.14	14.0434	9.85645	0.190318	0.300501	1.52254	0.110184	100
[23384]	Central American Volcanic Arc	CENTRAL AMERICAN VOLCANIC ARC / CENTRAL AMERICAN VOLCANIC ARC-NORTHWESTERN SEGMENT / NICARAGUA / NEJAPA-MIRAFLORES		12	-86.3	s_S26 [23384]	874	33.2085	NOT GIVEN [23384]				PLEISTOCENE-HOLOCENE [23384]					VOL					WR [23384]	48.5858	0.743302	15.8504	10.1006	11.7522	10.0948	0.200892	0.502231	1.98884	0.180803	100
[11616]	Central American Volcanic Arc	CENTRAL AMERICAN VOLCANIC ARC / CENTRAL AMERICAN VOLCANIC ARC-NORTHWESTERN SEGMENT / NICARAGUA / CERRO NEGRO	CERRO NEGRO, WESTERN NICARAGUA	12.4986	-86.7035	s_P2-3A [11616]	548	30.6689	NOT GIVEN [11616]				Quaternary					VOL					WR [11616]	48.1354	0.61816	15.9505	10.4378	12.6064	10.1642	0.192542	0.273612	1.52006	0.101338	100
[18727]	Central American Volcanic Arc	CENTRAL AMERICAN VOLCANIC ARC / CENTRAL AMERICAN VOLCANIC ARC-SOUTHEASTERN SEGMENT / PANAMA / EL BARU / CUESTA UNIT	LA CUESTA	8.68	-80.62	s_NB03081001A [18727]	795	32.593	ADAKITE [18727]				QUATERNARY [18727]					VOL					WR [18727]	52.477	0.822201	15.4471	7.48179	8.75644	10.185	0.12333	1.76773	2.62077	0.318603	100
[15846]	Central American Volcanic Arc	CENTRAL AMERICAN VOLCANIC ARC / CENTRAL AMERICAN VOLCANIC ARC-NORTHWESTERN SEGMENT / NICARAGUA / NEJAPA / NEJAPA FORMATION	PRE-MOTASTEPE	12.1428	-86.3136	s_A8 [15846]	73	26.9687	BASALT [15846]				QUATERNARY [15846]					VOL					WR [15846]	46.8791	0.65544	15.2365	10.0736	14.8331	10.2249	0.181507	0.252092	1.55289	0.110921	100
[23384]	Central American Volcanic Arc	CENTRAL AMERICAN VOLCANIC ARC / CENTRAL AMERICAN VOLCANIC ARC-NORTHWESTERN SEGMENT / NICARAGUA / NEJAPA-MIRAFLORES		12	-86.3	s_S11 [23384]	874	33.2085	NOT GIVEN [23384]				PLEISTOCENE-HOLOCENE [23384]					VOL					WR [23384]	47.7551	0.759786	15.7124	10.244	12.3693	10.4141	0.192479	0.476132	1.90453	0.172218	100
[23384]	Central American Volcanic Arc	CENTRAL AMERICAN VOLCANIC ARC / CENTRAL AMERICAN VOLCANIC ARC-NORTHWESTERN SEGMENT / NICARAGUA / NEJAPA-MIRAFLORES		12	-86.3	s_823 [23384]	874	33.2085	NOT GIVEN [23384]				PLEISTOCENE-HOLOCENE [23384]					VOL					WR [23384]	47.0748	1.0582	16.0544	11.5243	11.3177	10.6223	0.191484	0.131015	1.935	0.090703	100
[23384]	Central American Volcanic Arc	CENTRAL AMERICAN VOLCANIC ARC / CENTRAL AMERICAN VOLCANIC ARC-NORTHWESTERN SEGMENT / NICARAGUA / NEJAPA-MIRAFLORES		12	-86.3	s_S12 [23384]	874	33.2085	NOT GIVEN [23384]				PLEISTOCENE-HOLOCENE [23384]					VOL					WR [23384]	47.7824	0.758131	15.668	10.3384	12.1301	10.6947	0.19206	0.475095	1.7993	0.161735	100
[23384]	Central American Volcanic Arc	CENTRAL AMERICAN VOLCANIC ARC / CENTRAL AMERICAN VOLCANIC ARC-NORTHWESTERN SEGMENT / NICARAGUA / NEJAPA-MIRAFLORES		12	-86.3	s_858 [23384]	874	33.2085	NOT GIVEN [23384]				PLEISTOCENE-HOLOCENE [23384]					VOL					WR [23384]	48.0043	0.623955	14.7938	10.1505	13.8176	10.7984	0.191212	0.251595	1.2781	0.0905741	100
[15846]	Central American Volcanic Arc	CENTRAL AMERICAN VOLCANIC ARC / CENTRAL AMERICAN VOLCANIC ARC-NORTHWESTERN SEGMENT / NICARAGUA / NEJAPA / NEJAPA FORMATION	EL HORMIGON, 200 M SW OF ASOSOSCA	12.1354	-86.3233	s_A4 [15846]	124	27.366	BASALT [15846]				QUATERNARY [15846]					VOL					WR [15846]	47.2074	1.10883	15.4928	11.6838	10.9138	11.037	0.205339	0.154004	2.10472	0.0924025	100
[23384]	Central American Volcanic Arc	CENTRAL AMERICAN VOLCANIC ARC / CENTRAL AMERICAN VOLCANIC ARC-NORTHWESTERN SEGMENT / NICARAGUA / NEJAPA-MIRAFLORES		12	-86.3	s_420 [23384]	874	33.2085	NOT GIVEN [23384]				PLEISTOCENE-HOLOCENE [23384]					VOL					WR [23384]	46.9263	1.05373	15.244	11.9781	10.6879	11.852	0.190676	0.150533	1.82647	0.09032	100
[18727]	Central American Volcanic Arc	CENTRAL AMERICAN VOLCANIC ARC / CENTRAL AMERICAN VOLCANIC ARC-SOUTHEASTERN SEGMENT / PANAMA / EL BARU / CUESTA UNIT	LA CUESTA	8.68	-80.62	s_BM30100745B [18727]	795	32.593	ADAKITE [18727]				QUATERNARY [18727]					VOL					WR [18727]	49.291	0.848259	14.7781	8.21425	10.2915	12.4888	0.14308	0.817599	2.82072	0.3066	100
[18727]	Central American Volcanic Arc	CENTRAL AMERICAN VOLCANIC ARC / CENTRAL AMERICAN VOLCANIC ARC-SOUTHEASTERN SEGMENT / PANAMA / EL BARU / CUESTA UNIT	LA CUESTA	8.68	-80.62	s_BO301007-43 [18727]	795	32.593	ADAKITE [18727]				QUATERNARY [18727]					VOL					WR [18727]	48.9691	0.807295	14.1941	8.46908	10.2087	13.2642	0.132846	1.04233	2.62626	0.28613	100
[18727]	Central American Volcanic Arc	CENTRAL AMERICAN VOLCANIC ARC / CENTRAL AMERICAN VOLCANIC ARC-SOUTHEASTERN SEGMENT / PANAMA / EL BARU / CUESTA UNIT	LA CUESTA	8.68	-80.62	s_BM30100745C [18727]	795	32.593	ADAKITE [18727]				QUATERNARY [18727]					VOL					WR [18727]	48.3568	0.794739	14.0913	8.67267	9.8731	14.6313	0.142645	0.706737	2.46573	0.264913	100
[21481]	Honshu Arc	HONSHU ARC / NORTHEASTERN HONSHU ARC / HONSHU / HACHIMANTAI VOLCANIC GROUP	SENGAN VOLCANIC CLUSTER, ZARUMORIYAMA	39.785	140.838	s_3060219 [21481]	1342	36.8542	BASALT [21481]				Quaternary					VOL					WR [21481]	51.3591	0.666659	18.5193	8.72856	11.455	6.99942	0.161338	0.209029	1.83154	0.0700144	100
[9796]	Honshu Arc	HONSHU ARC / NORTHEASTERN HONSHU ARC / HONSHU / IWATE	FRONTAL ARC	39.88	140.98	s_2082708 [9796]	747	32.2191	BASALT, OLIVINE [9796]				QUATERNARY [9796]					VOL					WR [9796]	50.4575	0.754148	18.733	10.0754	10.4977	7.05882	0.180995	0.100553	2.04123	0.100553	100
[21481]	Honshu Arc	HONSHU ARC / NORTHEASTERN HONSHU ARC / HONSHU / IWATE	SENGAN VOLCANIC CLUSTER, IWATE (EASTERN)	39.849	141.004	s_IW15 [21481]	1811	40.5077	BASALT [21481]				Quaternary					VOL					WR [21481]	51.06	0.727775	18.4969	9.8858	10.4335	7.08287	0.17763	0.125863	1.92754	0.0822173	100
[3220]	Honshu Arc	HONSHU ARC / SOUTHWESTERN HONSHU ARC / HONSHU / ABU VOLCANO GROUP	ABU DISTRICT	34.418	131.491	s_ABU-27 [3220]	319	28.885	BASALT, AUGITE-OLIVINE [3220]				QUATERNARY [3220]					VOL					WR [3220]	51.1151	1.9902	17.2017	9.28093	8.60086	7.16072	0.140014	1.05011	2.93029	0.530053	100
[21481]	Honshu Arc	HONSHU ARC / NORTHEASTERN HONSHU ARC / HONSHU / IWATE	SENGAN VOLCANIC CLUSTER, IWATE (EASTERN)	39.847	141.004	s_IW17 [21481]	1811	40.5077	BASALT [21481]				Quaternary					VOL					WR [21481]	51.4334	0.761688	18.259	9.67344	10.4118	7.16437	0.176089	0.118758	1.91548	0.085997	100
[21481]	Honshu Arc	HONSHU ARC / NORTHEASTERN HONSHU ARC / HONSHU / IWATE	SENGAN VOLCANIC CLUSTER, IWATE (EASTERN)	39.845	141.007	s_IW2 [21481]	1811	40.5077	BASALT [21481]				Quaternary					VOL					WR [21481]	51.8058	0.78674	17.7561	9.6802	10.3961	7.17043	0.173486	0.1634	1.97189	0.0958209	100
[21481]	Honshu Arc	HONSHU ARC / NORTHEASTERN HONSHU ARC / HONSHU / IWATE	SENGAN VOLCANIC CLUSTER, IWATE (EASTERN)	39.847	141.004	s_IW18 [21481]	1811	40.5077	BASALT [21481]				Quaternary					VOL					WR [21481]	51.4125	0.724305	18.1431	9.83619	10.3929	7.17103	0.179555	0.121732	1.93249	0.0862268	100
[21481]	Honshu Arc	HONSHU ARC / NORTHEASTERN HONSHU ARC / HONSHU / HACHIMANTAI VOLCANIC GROUP	SENGAN VOLCANIC CLUSTER, NAKAKURAYAMA	39.881	140.901	s_0563 [21481]	1313	36.6283	BASALT [21481]				Quaternary					VOL					WR [21481]	52.8628	0.734764	17.658	9.20775	9.95074	7.2013	0.170036	0.254539	1.89204	0.0680146	100
[18191]	Honshu Arc	HONSHU ARC / SOUTHWESTERN HONSHU ARC / HONSHU / ABU VOLCANO GROUP - IRAO	EAST LAVA FLOW	34.5246	131.617	s_07.03.31.02 [18191]	424	29.703	NOT GIVEN [18191]				Quaternary					VOL					WR [18191]	49.5266	2.38781	15.9119	10.6319	8.96459	7.2149	0.185261	1.36888	3.24207	0.566077	100
[21481]	Honshu Arc	HONSHU ARC / NORTHEASTERN HONSHU ARC / HONSHU / IWATE	SENGAN VOLCANIC CLUSTER, IWATE (EASTERN)	39.849	141.009	s_IW9 [21481]	1388	37.2125	BASALT [21481]				Quaternary					VOL					WR [21481]	52.3636	0.753448	17.5513	9.30693	10.2941	7.23009	0.167768	0.180828	2.0534	0.0984506	100
[21481]	Honshu Arc	HONSHU ARC / NORTHEASTERN HONSHU ARC / HONSHU / IWATE	SENGAN VOLCANIC CLUSTER, IWATE (EASTERN)	39.848	141.009	s_IW7 [21481]	1388	37.2125	BASALT [21481]				Quaternary					VOL					WR [21481]	52.9065	0.759029	17.2523	9.39769	10.0576	7.245	0.166101	0.174154	1.94589	0.0956336	100
[21481]	Honshu Arc	HONSHU ARC / NORTHEASTERN HONSHU ARC / HONSHU / IWATE	SENGAN VOLCANIC CLUSTER, IWATE (EASTERN)	39.85	141.005	s_IW14 [21481]	1811	40.5077	BASALT [21481]				Quaternary					VOL					WR [21481]	52.1148	0.759047	17.6178	9.36411	10.3631	7.34932	0.168903	0.166868	1.99835	0.097679	100
[18191]	Honshu Arc	HONSHU ARC / SOUTHWESTERN HONSHU ARC / HONSHU / ABU VOLCANO GROUP - IRAO		34.5246	131.617	s_7011503 [18191]	424	29.703	NOT GIVEN [18191]				Quaternary					VOL					WR [18191]	50.1664	2.27891	15.3877	10.1845	9.11566	7.39135	0.171423	1.39155	3.34779	0.564687	100
[9796]	Honshu Arc	HONSHU ARC / NORTHEASTERN HONSHU ARC / HONSHU / IWATE	FRONTAL ARC	39.88	140.98	s_2082709 [9796]	747	32.2191	BASALT, OLIVINE [9796]				QUATERNARY [9796]					VOL					WR [9796]	51.7436	0.776053	17.6678	9.63515	10.2903	7.3977	0.171336	0.151179	2.05604	0.110865	100
[9796]	Honshu Arc	HONSHU ARC / NORTHEASTERN HONSHU ARC / HONSHU / IWATE	FRONTAL ARC	39.88	140.98	s_95072606 [9796]	747	32.2191	BASALT, OLIVINE [9796]				QUATERNARY [9796]					VOL					WR [9796]	51.7407	0.782583	17.578	9.60169	10.3241	7.41447	0.170563	0.150497	2.12702	0.110364	100
[21481]	Honshu Arc	HONSHU ARC / NORTHEASTERN HONSHU ARC / HONSHU / IWATE	SENGAN VOLCANIC CLUSTER, IWATE (EASTERN)	39.85	141.006	s_IW12 [21481]	1811	40.5077	BASALT [21481]				Quaternary					VOL					WR [21481]	52.1216	0.742861	17.5239	9.36699	10.2747	7.5048	0.169424	0.170427	2.02708	0.0982461	100
[16923]	Honshu Arc	HONSHU ARC / NORTHEASTERN HONSHU ARC / HONSHU / AZUMA		37.435	140.14	s_AZE-13 [16923]	512	30.3885	BASALT [16923]				Quaternary					VOL					WR [16923]	53.1601	0.859541	16.2403	8.85833	9.71787	7.67519	0.161796	0.910102	2.32582	0.0910102	100
[18191]	Honshu Arc	HONSHU ARC / SOUTHWESTERN HONSHU ARC / HONSHU / ABU VOLCANO GROUP - IRAO	EAST LAVA FLOW	34.5246	131.617	s_6120201 [18191]	424	29.703	NOT GIVEN [18191]				Quaternary					VOL					WR [18191]	50.1146	2.25302	15.3026	10.1186	9.06191	7.71608	0.169475	1.3558	3.33965	0.568238	100
[16923]	Honshu Arc	HONSHU ARC / NORTHEASTERN HONSHU ARC / HONSHU / AZUMA		37.435	140.14	s_AZE-15 [16923]	512	30.3885	BASALT [16923]				Quaternary					VOL					WR [16923]	53.6222	0.862419	16.183	8.94886	9.08076	7.75162	0.172484	0.994318	2.25244	0.131899	100
[21481]	Honshu Arc	HONSHU ARC / NORTHEASTERN HONSHU ARC / HONSHU / HACHIMANTAI	SENGAN VOLCANIC CLUSTER	39.951	140.909	s_HM15 [21481]	1216	35.8726	ANDESITE, BASALTIC [21481]				Quaternary					VOL					WR [21481]	55.6229	0.665177	15.4592	8.24534	9.34717	7.8801	0.157112	0.587641	1.96493	0.0703945	100
[9796]	Honshu Arc	HONSHU ARC / NORTHEASTERN HONSHU ARC / HONSHU / IWATE	FRONTAL ARC	39.88	140.98	s_95073105 [9796]	747	32.2191	BASALT, OLIVINE [9796]				QUATERNARY [9796]					VOL					WR [9796]	51.2528	0.838553	17.3772	9.84037	10.5678	7.90059	0.171752	0.0505153	1.89937	0.101031	100
[6753]	Honshu Arc	HONSHU ARC / SOUTHWESTERN HONSHU ARC / KYUSHU	MYOKANJI-TOGE, 7 KM NNW OF SASEBO CITY	33.25	129.75	s_JB-1 [6753]	243	28.293	TRACHYBASALT, TITANAUGITE-OLIVINE [6753]				PLIOCENE [6753]					VOL					WR [6753]	53.3655	1.37044	14.8601	8.28253	9.44993	7.91585	0.153408	1.47272	2.86361	0.265907	100			0.97	0.97
[18191]	Honshu Arc	HONSHU ARC / SOUTHWESTERN HONSHU ARC / HONSHU / ABU VOLCANO GROUP - IRAO	EAST LAVA FLOW	34.5246	131.617	s_07.02.05.07 [18191]	424	29.703	NOT GIVEN [18191]				Quaternary					VOL					WR [18191]	49.6519	2.30047	15.286	10.1705	9.22208	7.92049	0.171527	1.35203	3.34981	0.575119	100
[18191]	Honshu Arc	HONSHU ARC / SOUTHWESTERN HONSHU ARC / HONSHU / ABU VOLCANO GROUP - IRAO		34.5246	131.617	s_07.03.07.07 [18191]	424	29.703	NOT GIVEN [18191]				Quaternary					VOL					WR [18191]	50.6626	2.32152	16.0657	10.3338	8.56703	7.93015	0.174628	1.32512	2.0339	0.585516	100
[18191]	Honshu Arc	HONSHU ARC / SOUTHWESTERN HONSHU ARC / HONSHU / ABU VOLCANO GROUP - IRAO	EAST LAVA FLOW	34.5246	131.617	s_07.03.31.01 [18191]	424	29.703	NOT GIVEN [18191]				Quaternary					VOL					WR [18191]	50.2106	2.26035	15.1649	10.2743	8.84619	8.02425	0.174664	1.36649	3.14394	0.534265	100
[16923]	Honshu Arc	HONSHU ARC / NORTHEASTERN HONSHU ARC / HONSHU / AZUMA		37.435	140.14	s_AZE-14 [16923]	512	30.3885	BASALT [16923]				Quaternary					VOL					WR [16923]	52.0914	0.903553	16.8122	9.27919	9.50254	8.05076	0.172589	0.791878	2.25381	0.142132	100
[21481]	Honshu Arc	HONSHU ARC / NORTHEASTERN HONSHU ARC / HONSHU / IWATE	SENGAN VOLCANIC CLUSTER, IWATE (EASTERN)	39.83	140.999	s_IW28 [21481]	1299	36.5192	BASALT [21481]				Quaternary					VOL					WR [21481]	51.451	0.805148	17.0916	9.71435	10.4832	8.33176	0.171221	0.109052	1.75808	0.0845915	100
[3220]	Honshu Arc	HONSHU ARC / SOUTHWESTERN HONSHU ARC / HONSHU / ABU VOLCANO GROUP	ABU DISTRICT	34.418	131.491	s_ABU-8 [3220]	319	28.885	BASALT, AUGITE-OLIVINE [3220]				QUATERNARY [3220]					VOL					WR [3220]	50.135	1.24988	16.7183	8.9791	10.099	8.54915	0.159984	0.949905	2.73973	0.419958	100
[14627]	Honshu Arc	HONSHU ARC / NORTHEASTERN HONSHU ARC / HOKKAIDO / USU		42.57	140.78	s_H-1/U-5 [14627]	217	28.0904	NOT GIVEN [14627]				Quaternary					VOL					WR [14627]	49.7801	0.689724	16.0936	11.0956	10.7957	8.9964	0.209916	0.179928	2.03918	0.119952	100
[3220]	Honshu Arc	HONSHU ARC / SOUTHWESTERN HONSHU ARC / HONSHU / ABU VOLCANO GROUP	ABU DISTRICT	34.418	131.491	s_ABU-25 [3220]	319	28.885	BASALT, OLIVINE [3220]				QUATERNARY [3220]					VOL					WR [3220]	47.6003	1.66611	14.8233	9.79777	10.8146	10.5924	0.161562	1.20162	2.83744	0.504882	100		0.77
[10790]	Izu-Bonin Arc	IZU-BONIN ARC / IZU ARC / TORISHIMA/MITUGO-YAMA / TORISHIMA/MITUGO-YAMA	OLDER PREHISTORIC UNITS	30.485	140.302	s_35 [10790]	52	26.8051	BASALT [10790]				Quaternary					VOL					WR [10790]	48.7818	0.598918	18.2271	10.2123	13.4756	7.04726	0.179675	0.0998196	1.3276	0.0499098	100
[10790]	Izu-Bonin Arc	IZU-BONIN ARC / IZU ARC / TORISHIMA/MITUGO-YAMA / TORISHIMA/MITUGO-YAMA	OLDER PREHISTORIC UNITS	30.485	140.302	s_35.5 [10790]	52	26.8051	BASALT [10790]				Quaternary					VOL					WR [10790]	48.5328	0.559341	18.2086	9.97603	13.5341	7.60105	0.179788	0.0898941	1.26851	0.0499412	100
[10790]	Izu-Bonin Arc	IZU-BONIN ARC / IZU ARC / TORISHIMA/MITUGO-YAMA / TORISHIMA/MITUGO-YAMA	OLDER PREHISTORIC UNITS	30.485	140.302	s_33 [10790]	52	26.8051	BASALT [10790]				Quaternary					VOL					WR [10790]	48.6236	0.557976	18.0146	9.99651	13.5807	7.62235	0.179349	0.0896747	1.28534	0.0498193	100
[5246]	Izu-Bonin Arc	IZU-BONIN ARC / IZU ARC / HACHIJOJIMA/HATIZYO-ZIMA / HIGASHIYAMA / ISHIZUMI LAVA	SUEYOSHI STAGE	33.13	139.77	s_1 [5246]	553	30.7079	BASALT, OLIVINE-AUGITE-HYPERSTHENE [5246]				Quaternary					VOL					WR [5246]	48.5503	0.609878	17.8964	10.5479	11.9676	8.76825	0.179964	0.109978	1.32973	0.039992	100
[22526]	Kamchatka Arc	KAMCHATKA ARC / KAMCHATKA ARC / CENTRAL KAMCHATKA SEGMENT / TOLMACHEV DOL	SOUTH KAMCHATKA	52.633	157.565	s_N136-B [22526]	731	32.0945	BASALT [22526]				QUATERNARY					VOL					WR [22526]	51.7597	1.06189	17.2128	9.11206	9.04126	7.0085	0.171926	0.960761	3.25647	0.414644	100		0.14
[9813]	Kamchatka Arc	KAMCHATKA ARC / KAMCHATKA ARC / SOUTHERN KAMCHATKA SEGMENT / MUTNOVSKY	SOUTHERN KAMCHATKAN SUBDUCTION ZONE	52.473	158.137	s_N72 [9813]	1194	35.7013	BASALT [9813]			UPPER [9813]	PLEISTOCENE [9813]					VOL					WR [9813]	50.0612	0.897227	18.3524	9.35971	11.3173	7.01468	0.173328	0.224307	2.44698	0.152936	100		0.8				0.03
[22589]	Kamchatka Arc	KAMCHATKA ARC / KAMCHATKA ARC / CENTRAL KAMCHATKA SEGMENT / KAMEN	CENTRAL KAMCHATKA DEPRESSION	55.965	160.452	s_KAM-08-13 [22589]	1497	38.0616	BASALT [22589]				QUATERNARY					VOL					WR [22589]	51.0851	1.14011	17.0017	9.58096	10.341	7.0307	0.180018	0.620062	2.86029	0.160016	100
[22589]	Kamchatka Arc	KAMCHATKA ARC / KAMCHATKA ARC / CENTRAL KAMCHATKA SEGMENT / KAMEN	CENTRAL KAMCHATKA DEPRESSION	56.0019	160.338	s_KAM-08-20 [22589]	1482	37.9448	ANDESITE, BASALTIC [22589]				QUATERNARY					VOL					WR [22589]	52.2448	1.10989	16.6983	8.85911	9.75902	7.0393	0.169983	0.739926	3.18968	0.189981	100
[12904]	Kamchatka Arc	KAMCHATKA ARC / KAMCHATKA ARC / CENTRAL KAMCHATKA SEGMENT / KLYUCHEVSKOY		56.1421	160.801	s_KLV 5/19 [12904]	513	30.3963	ANDESITE, BASALTIC [12904]				QUATERNARY					VOL					WR [12904]	54.6147	0.841768	16.8253	7.92665	8.56799	7.07486	0.160337	0.851789	2.95621	0.180379	100
[4276][7063]	Kamchatka Arc	KAMCHATKA ARC / KAMCHATKA ARC / CENTRAL KAMCHATKA SEGMENT / SHIVELUCH (SHEVELUCH)	NORTHERN CENTRAL KAMCHATKA DEPRESSION	56.63	161.32	s_2569 [4276]	2196	43.5068	BASALT [4276]				QUATERNARY					VOL					WR [4276]	55.7584	0.719921	15.1792	7.55609	8.65933	7.10795	0.152096	1.34858	3.28527	0.233214	100
[2475][2195]	Kamchatka Arc	KAMCHATKA ARC / KAMCHATKA ARC / CENTRAL KAMCHATKA SEGMENT / KAMEN	CENTRAL KAMCHATKA DEPRESSION	56.14	160.17	s_K-2310 [2475]	536	30.5754	BASALT [2475]			UPPER [2475]	PLEISTOCENE [2475]					VOL					WR [2475]	50.9073	1.11895	16.9355	9.79839	10.5847	7.11694	0.191532	0.554435	2.63105	0.16129	100
[22589]	Kamchatka Arc	KAMCHATKA ARC / KAMCHATKA ARC / CENTRAL KAMCHATKA SEGMENT / KAMEN	CENTRAL KAMCHATKA DEPRESSION	55.965	160.452	s_2310 [22589]	1497	38.0616	BASALT [22589]				QUATERNARY					VOL					WR [22589]	50.7549	1.11989	16.8983	10.039	10.459	7.12929	0.189981	0.559944	2.68973	0.159984	100
[4276]	Kamchatka Arc	KAMCHATKA ARC / KAMCHATKA ARC / CENTRAL KAMCHATKA SEGMENT / KAMEN	CENTRAL KAMTCHATKA DEPRESSION	56.14	160.17	s_2310 [4276]	536	30.5754	BASALT [4276]				QUATERNARY					VOL					WR [4276]	50.9813	1.12978	16.977	9.63782	10.4101	7.19226	0.181572	0.574977	2.76392	0.15131	100
[20395]	Kamchatka Arc	KAMCHATKA ARC / KAMCHATKA ARC / SOUTHERN KAMCHATKA SEGMENT / GORELY	EASTERN VOLCANIC FRONT, OLD GORELY	52.45	158.12	s_OG-162 [20395]	975	33.9952	BASALT [20395]				QUATERNARY					VOL					WR [20395]	51.8857	1.15111	16.7416	9.11799	9.40324	7.19443	0.171656	1.0678	2.94845	0.318069	100
[24736]	Kamchatka Arc	KAMCHATKA ARC / KAMCHATKA ARC / CENTRAL KAMCHATKA SEGMENT / KLYUCHEVSKOY	SATELLITE SCORIA CONE (BULOCHKA)	56.1423	160.08	s_KLU-16-01 [24736]	180	27.8022	NOT GIVEN [24736]				HOLOCENE [24736]					VOL					WR [24736]	52.3209	0.880352	16.4066	9.90396	9.08363	7.23289	0.180072	0.710284	3.11124	0.170068	100
[4788]	Kamchatka Arc	KAMCHATKA ARC / KAMCHATKA ARC / CENTRAL KAMCHATKA SEGMENT / BAKENING	LEVAYA AVACHA VALLEY	53.93	158.07	s_BAK42 [4788]	1164	35.4676	BASALT [4788]				QUATERNARY					VOL					WR [4788]	53.981	0.987888	16.8546	7.64253	7.98375	7.3386	0.141127	1.04837	3.72978	0.292334	100
[22526]	Kamchatka Arc	KAMCHATKA ARC / KAMCHATKA ARC / CENTRAL KAMCHATKA SEGMENT / KARCHINSKY	CENTRAL KAMCHATKA DEPRESSION	56.4333	160.842	s_7403-1 [22526]	939	33.7148	BASALT [22526]				QUATERNARY					VOL					WR [22526]	53.2753	0.909825	15.4872	8.35033	9.73512	7.34936	0.161747	1.31419	3.1945	0.222402	100		0.42				0.05
[12904]	Kamchatka Arc	KAMCHATKA ARC / KAMCHATKA ARC / CENTRAL KAMCHATKA SEGMENT / KLYUCHEVSKOY	LEPYOSHKA	56.1499	160.795	s_KLV 8 [12904]	883	33.2786	ANDESITE, BASALTIC [12904]				QUATERNARY					VOL					WR [12904]	53.1859	1.0098	16.1264	8.866	9.61325	7.35131	0.171665	0.727052	2.78703	0.161567	100
[22589]	Kamchatka Arc	KAMCHATKA ARC / KAMCHATKA ARC / CENTRAL KAMCHATKA SEGMENT / KAMEN	CENTRAL KAMCHATKA DEPRESSION	55.9892	160.637	s_KAM-09-45 [22589]	1777	40.2428	ANDESITE, BASALTIC [22589]				QUATERNARY					VOL					WR [22589]	53.39	0.94	16.16	8.75	9.35	7.36	0.18	0.77	2.93	0.17	100
[20395]	Kamchatka Arc	KAMCHATKA ARC / KAMCHATKA ARC / SOUTHERN KAMCHATKA SEGMENT / GORELY	EASTERN VOLCANIC FRONT, OLD GORELY	52.45	158.12	s_OG-161 [20395]	975	33.9952	BASALT [20395]				QUATERNARY					VOL					WR [20395]	51.7847	1.15347	16.6576	9.12066	9.38529	7.36723	0.171707	1.07266	2.96548	0.321193	100
[22561]	Kamchatka Arc	KAMCHATKA ARC / KAMCHATKA ARC / CENTRAL KAMCHATKA SEGMENT / SHIVELUCH (SHEVELUCH)	CENTRAL KAMCHATKA DEPRESSION, OLD SHIVELUCH, UPPER DRY ILCHINETS RIVER	56.638	161.394	s_7526-2 [22561]	1564	38.5836	ANDESITE, BASALTIC [22561]				QUATERNARY					VOL					WR [22561]	54.723	0.761294	15.296	8.04367	9.13553	7.37253	0.150255	1.18201	3.10528	0.230392	100		0.35				0.01
[4276]	Kamchatka Arc	KAMCHATKA ARC / KAMCHATKA ARC / EASTERN KAMCHATKA SEGMENT / KOMAROV	EASTERN VOLCANIC FRONT	55.0052	160.759	s_KOM-02 [4276]	1141	35.2884	BASALT [4276]				QUATERNARY					VOL					WR [4276]	54.2788	0.758084	16.1725	8.24151	9.46089	7.40901	0.171832	0.808623	2.57749	0.121293	100
[4276][7063]	Kamchatka Arc	KAMCHATKA ARC / KAMCHATKA ARC / CENTRAL KAMCHATKA SEGMENT / SHIVELUCH (SHEVELUCH)	NORTHERN CENTRAL KAMCHATKA DEPRESSION	56.63	161.32	s_2585 [4276]	2196	43.5068	BASALT [4276]				QUATERNARY					VOL					WR [4276]	55.8979	0.689604	15.1513	7.23332	8.55508	7.41574	0.149914	1.28926	3.38805	0.229868	100
[22589]	Kamchatka Arc	KAMCHATKA ARC / KAMCHATKA ARC / CENTRAL KAMCHATKA SEGMENT / KAMEN	CENTRAL KAMCHATKA DEPRESSION	56.0037	160.503	s_KAM-08-66 [22589]	1860	40.8894	ANDESITE, BASALTIC [22589]				QUATERNARY					VOL					WR [22589]	53.2847	0.909909	16.0984	8.66913	9.61904	7.41926	0.169983	0.739926	2.93971	0.149985	100
[22561]	Kamchatka Arc	KAMCHATKA ARC / KAMCHATKA ARC / CENTRAL KAMCHATKA SEGMENT / SHIVELUCH (SHEVELUCH)	CENTRAL KAMCHATKA DEPRESSION, OLD SHIVELUCH, UPPER DRY ILCHINETS RIVER	56.6389	161.418	s_7528 [22561]	1378	37.1346	ANDESITE, BASALTIC [22561]				QUATERNARY					VOL					WR [22561]	54.6859	0.757727	15.2044	8.07577	9.15254	7.43769	0.149551	1.17647	3.12064	0.239282	100		0.13				0.01
[22561]	Kamchatka Arc	KAMCHATKA ARC / KAMCHATKA ARC / CENTRAL KAMCHATKA SEGMENT / SHIVELUCH (SHEVELUCH)	CENTRAL KAMCHATKA DEPRESSION, OLD SHIVELUCH, UPPER DRY ILCHINETS RIVER	56.6346	161.398	s_7523-1 [22561]	1564	38.5836	ANDESITE, BASALTIC [22561]				QUATERNARY					VOL					WR [22561]	53.8392	0.868697	16.1258	7.62856	8.35746	7.50874	0.13979	1.17823	4.10384	0.249626	100		0.16				0.02
[4788]	Kamchatka Arc	KAMCHATKA ARC / KAMCHATKA ARC / CENTRAL KAMCHATKA SEGMENT / BAKENING	LEVAYA AVACHA VALLEY	53.93	158.07	s_BAK44 [4788]	1164	35.4676	BASALT [4788]				QUATERNARY					VOL					WR [4788]	52.4221	1.0569	17.1821	8.42242	8.5659	7.51907	0.150985	0.915977	3.50286	0.261708	100
[22561]	Kamchatka Arc	KAMCHATKA ARC / KAMCHATKA ARC / CENTRAL KAMCHATKA SEGMENT / SHIVELUCH (SHEVELUCH)	CENTRAL KAMCHATKA DEPRESSION, OLD SHIVELUCH, UPPER DRY ILCHINETS RIVER	56.6361	161.425	s_7527 [22561]	1378	37.1346	ANDESITE, BASALTIC [22561]				QUATERNARY					VOL					WR [22561]	54.6058	0.76428	15.185	7.99477	9.21158	7.52212	0.160901	1.18665	3.12751	0.241352	100		0.56				0.06
[22526]	Kamchatka Arc	KAMCHATKA ARC / KAMCHATKA ARC / CENTRAL KAMCHATKA SEGMENT / KARCHINSKY	CENTRAL KAMCHATKA DEPRESSION	56.4497	160.809	s_7429 [22526]	887	33.3097	BASALT [22526]				QUATERNARY					VOL					WR [22526]	50.9051	0.960282	15.5688	9.37598	10.9206	7.54945	0.163452	1.32805	2.983	0.245178	100		1.07				0.06
[4788]	Kamchatka Arc	KAMCHATKA ARC / KAMCHATKA ARC / CENTRAL KAMCHATKA SEGMENT / BAKENING	LEVAYA AVACHA VALLEY	53.93	158.07	s_BAK01 [4788]	1164	35.4676	BASALT [4788]				QUATERNARY					VOL					WR [4788]	49.6729	1.60203	16.5543	9.79281	8.40308	7.59703	0.191437	1.89422	3.84889	0.443328	100
[4788]	Kamchatka Arc	KAMCHATKA ARC / KAMCHATKA ARC / CENTRAL KAMCHATKA SEGMENT / BAKENING	KOSTAKAN	53.93	158.07	s_BAK41 [4788]	1164	35.4676	BASALT [4788]				QUATERNARY					VOL					WR [4788]	52.0367	1.03063	17.1671	8.54677	9.00285	7.63879	0.171772	0.929588	3.24345	0.232397	100
[24381]	Kamchatka Arc	KAMCHATKA ARC / KAMCHATKA ARC / CENTRAL KAMCHATKA SEGMENT / AVACHA (AVACHINSKY)	SOMMA VOLCANO	53.2269	158.675	s_91313/1 [24381]	529	30.5209	ANDESITE [24381]				HOLOCENE [24381]					VOL					WR [24381]	53.4334	0.860013	16.9341	8.16293	8.83561	7.69916	0.143335	0.511912	3.29672	0.122859	100
[12904]	Kamchatka Arc	KAMCHATKA ARC / KAMCHATKA ARC / CENTRAL KAMCHATKA SEGMENT / KLYUCHEVSKOY		56.1421	160.801	s_KLV 5/6 [12904]	513	30.3963	ANDESITE, BASALTIC [12904]				QUATERNARY					VOL					WR [12904]	53.0785	0.885312	16.6499	8.2495	9.35614	7.7163	0.160966	0.684105	3.05835	0.160966	100
[3317]	Kamchatka Arc	KAMCHATKA ARC / KAMCHATKA ARC / CENTRAL KAMCHATKA SEGMENT / TOLBACHIK	CENTRAL KAMCHATKA DEPRESSION	55.615	160.27	s_2 [3317]	582	30.9338	BASALT [3317]				HOLOCENE			1975		VOL					WR [3317]	50.3005	1.30729	15.4059	10.0584	9.88513	7.73313	0.170953	1.62909	3.15761	0.351963	100			0.09	0.11
[15433]	Kamchatka Arc	KAMCHATKA ARC / KAMCHATKA ARC / CENTRAL KAMCHATKA SEGMENT / STUDENAYA		56.6271	161.326	s_7556 [15433]	2099	42.7512	ANDESITE, BASALTIC, OLIVINE-CLINOPYROXENE-PLAGIOCLASE [15433]				HOLOCENE [15433]					VOL					WR [15433]	56.1384	0.693948	15.6853	6.9803	7.72528	7.7763	0.122461	0.979692	3.71466	0.183692	100		0.5				0
[22526]	Kamchatka Arc	KAMCHATKA ARC / KAMCHATKA ARC / CENTRAL KAMCHATKA SEGMENT / ASACHA	SOUTH KAMCHATKA	52.458	157.986	s_N163-G [22526]	731	32.0945	BASALT [22526]				QUATERNARY					VOL					WR [22526]	51.3188	1.01061	17.0288	8.80243	9.66145	7.85245	0.171804	0.848914	3.02173	0.282971	100		0.1				0.01
[15280]	Kamchatka Arc	KAMCHATKA ARC / KAMCHATKA ARC / CENTRAL KAMCHATKA SEGMENT / KARYMSKY	PRE-CALDERA STAGE, DITMAR, SOUTHERN SECTOR	54.07	159.6	s_21-99L [15280]	510	30.3729	BASALT [15280]				QUATERNARY					VOL					WR [15280]	49.7544	0.824996	17.0194	9.99393	11.3055	7.85274	0.162962	0.407406	2.56665	0.112037	100
[24381]	Kamchatka Arc	KAMCHATKA ARC / KAMCHATKA ARC / CENTRAL KAMCHATKA SEGMENT / AVACHA (AVACHINSKY)	SOMMA VOLCANO	53.2734	158.773	s_91151/1 [24381]	1127	35.1793	ANDESITE [24381]				HOLOCENE [24381]					VOL					WR [24381]	53.7222	0.832981	16.4388	8.19147	8.85167	7.88823	0.150539	0.521867	3.27171	0.130467	100
[22589]	Kamchatka Arc	KAMCHATKA ARC / KAMCHATKA ARC / CENTRAL KAMCHATKA SEGMENT / KAMEN	CENTRAL KAMCHATKA DEPRESSION	55.9821	160.66	s_KAM-09-12 [22589]	1548	38.4589	ANDESITE, BASALTIC [22589]				QUATERNARY					VOL					WR [22589]	53.27	0.97	15.58	8.47	9.53	7.9	0.17	0.89	3.04	0.18	100
[4788]	Kamchatka Arc	KAMCHATKA ARC / KAMCHATKA ARC / CENTRAL KAMCHATKA SEGMENT / BAKENING	LEVAYA AVACHA VALLEY	53.93	158.07	s_23/7 [4788]	1164	35.4676	BASALT [4788]				QUATERNARY					VOL					WR [4788]	49.3266	1.64084	16.3071	10.1892	8.50807	7.90035	0.192444	1.70161	3.76786	0.465918	100
[24346]	Kamchatka Arc	KAMCHATKA ARC / KAMCHATKA ARC / CENTRAL KAMCHATKA SEGMENT / SHIVELUCH (SHEVELUCH)	NORTHERN CENTRAL KAMCHATKA DEPRESSION	56.63	161.32	s_7499-4 [24346]	2196	43.5068	ANDESITE [24346]				HOLOCENE			2005		VOL					WR [24346]	56.9212	0.59651	15.6306	6.3681	7.57265	7.90629	0.111214	0.980703	3.78127	0.131434	100		0.46				0.05
[22589]	Kamchatka Arc	KAMCHATKA ARC / KAMCHATKA ARC / CENTRAL KAMCHATKA SEGMENT / KAMEN	CENTRAL KAMCHATKA DEPRESSION	55.9832	160.665	s_KAM-09-36 [22589]	1548	38.4589	ANDESITE, BASALTIC [22589]				QUATERNARY					VOL					WR [22589]	53.36	0.98	15.56	8.47	9.4	7.93	0.17	0.92	3.02	0.19	100
[4788]	Kamchatka Arc	KAMCHATKA ARC / KAMCHATKA ARC / CENTRAL KAMCHATKA SEGMENT / BAKENING	LEVAYA AVACHA VALLEY	53.93	158.07	s_23/8 [4788]	1164	35.4676	BASALT [4788]				QUATERNARY					VOL					WR [4788]	49.7125	1.57946	16.4021	9.83907	8.29217	7.93781	0.19237	1.75158	3.85753	0.435364	100
[15899][2536][3043]	Kamchatka Arc	KAMCHATKA ARC / KAMCHATKA ARC / SOUTHERN KAMCHATKA SEGMENT / KSUDACH		51.6	157.4	s_KA39/7 [15899]	513	30.3963	BASALT [15899]				QUATERNARY					VOL					WR [15899]	48.8462	0.678842	18.2679	9.67346	12.1786	7.96373	0.192507	0.192507	1.94534	0.0607918	100		1.21	0.32	0.76		0.22
[4276][7063]	Kamchatka Arc	KAMCHATKA ARC / KAMCHATKA ARC / CENTRAL KAMCHATKA SEGMENT / PLOSKIE SOPKY	CENTRAL KAMTCHATKA DEPRESSION	56	160.5	s_3-90 [4276]	1860	40.8894	BASALT [4276]				QUATERNARY					VOL					WR [4276]	51.029	0.875948	16.0828	9.55333	10.4503	7.98538	0.173152	1.00836	2.61766	0.22408	100
[22589]	Kamchatka Arc	KAMCHATKA ARC / KAMCHATKA ARC / CENTRAL KAMCHATKA SEGMENT / KAMEN	CENTRAL KAMCHATKA DEPRESSION	55.9844	160.654	s_KAM-09-38 [22589]	1610	38.9419	ANDESITE, BASALTIC [22589]				QUATERNARY					VOL					WR [22589]	53.3047	0.969903	15.4785	8.46915	9.50905	7.9892	0.169983	0.929907	2.9897	0.189981	100
[15280]	Kamchatka Arc	KAMCHATKA ARC / KAMCHATKA ARC / CENTRAL KAMCHATKA SEGMENT / KARYMSKY	PRE-CALDERA STAGE, PRIBREZHNYI YUZHNYI, NORTHERN SECTOR	54.07	159.6	s_C571B [15280]	510	30.3729	BASALT [15280]				QUATERNARY					VOL					WR [15280]	49.4636	0.829621	17.5839	10.1682	10.7952	8.03316	0.182112	0.41481	2.41804	0.111291	100
[24736]	Kamchatka Arc	KAMCHATKA ARC / KAMCHATKA ARC / CENTRAL KAMCHATKA SEGMENT / BAKENING	SATELLITE MONOGENETIC CONE FIELD	53.9618	158.447	s_BAK-16-01B [24736]	996	34.1588	NOT GIVEN [24736]				HOLOCENE [24736]					VOL					WR [24736]	50.2516	1.20749	17.5891	8.72409	9.65989	8.07003	0.160998	0.855303	3.19984	0.281747	100
[4276][7063][15259]	Kamchatka Arc	KAMCHATKA ARC / KAMCHATKA ARC / CENTRAL KAMCHATKA SEGMENT / PLOSKIE SOPKY	CENTRAL KAMTCHATKA DEPRESSION	56	160.5	s_2330 [4276]	1860	40.8894	BASALT [4276]				QUATERNARY					VOL					WR [4276]	51.1401	1.00434	15.4912	9.9037	10.4492	8.08544	0.192752	0.882601	2.62751	0.223186	100
[4276]	Kamchatka Arc	KAMCHATKA ARC / KAMCHATKA ARC / CENTRAL KAMCHATKA SEGMENT / PLOSKIE SOPKY	CENTRAL KAMTCHATKA DEPRESSION	56	160.5	s_128 [4276]	1860	40.8894	BASALT [4276]				QUATERNARY					VOL					WR [4276]	51.2962	1.25064	15.1287	9.44993	10.0253	8.11905	0.171458	1.37167	2.82402	0.363088	100
[4788][24876]	Kamchatka Arc	KAMCHATKA ARC / KAMCHATKA ARC / CENTRAL KAMCHATKA SEGMENT / BAKENING	LEVAYA AVACHA VALLEY	53.93	158.07	s_BAK04 [4788] / s_BAK-96-04 [24876]	1164	35.4676	BASALT [4788] / NOT GIVEN [24876]				QUATERNARY					VOL					WR [4788]	49.2069	1.14059	17.4218	9.59052	10.5681	8.16582	0.171593	0.706561	2.85652	0.171593	100
[4276][20793][7063]	Kamchatka Arc	KAMCHATKA ARC / KAMCHATKA ARC / EASTERN KAMCHATKA SEGMENT / SHMIDT	EASTERN VOLCANIC FRONT	54.8667	160.776	s_SHM-01 [4276] / s_SHM-01 (198) [20793]	922	33.5824	BASALT [4276]				QUATERNARY					VOL					WR [4276]	51.2954	0.902232	16.3922	9.44226	10.5328	8.18091	0.182474	0.577834	2.37216	0.121649	100
[22526]	Kamchatka Arc	KAMCHATKA ARC / KAMCHATKA ARC / CENTRAL KAMCHATKA SEGMENT / ZARECHNY	CENTRAL KAMCHATKA DEPRESSION	56.3576	160.787	s_K2-94 [22526]	14	26.5091	BASALT [22526]				QUATERNARY					VOL					WR [22526]	52.2616	1.03598	14.5942	9.09547	10.0279	8.22747	0.170987	1.15667	3.17834	0.251451	100		0.17				0.02
[4276][20793][7063][24876]	Kamchatka Arc	KAMCHATKA ARC / KAMCHATKA ARC / EASTERN KAMCHATKA SEGMENT / KOMAROV	EASTERN VOLCANIC FRONT	55.0052	160.759	s_KOM-06 [4276] / s_KOM-06 (202) [20793] / s_KOM-96-06 [24876]	1141	35.2884	BASALT [4276] / NOT GIVEN [24876]				QUATERNARY					VOL					WR [4276]	52.0086	0.834955	16.4174	9.35209	9.73778	8.24895	0.181075	0.684059	2.42439	0.110657	100
[2475][2195]	Kamchatka Arc	KAMCHATKA ARC / KAMCHATKA ARC / CENTRAL KAMCHATKA SEGMENT / SHIVELUCH (SHEVELUCH)	NORTHERN CENTRAL KAMCHATKA DEPRESSION	56.63	161.32	s_2581/1 [2475]	2196	43.5068	ANDESITE, BASALTIC [2475]				HOLOCENE [2475]			1964	PHYRIC [2475]	VOL					WR [2475]	55.0719	0.708645	14.7803	7.72424	8.83782	8.28103	0.161976	1.22494	2.97631	0.232841	100
[4788]	Kamchatka Arc	KAMCHATKA ARC / KAMCHATKA ARC / CENTRAL KAMCHATKA SEGMENT / BAKENING	KAVYCHA VALLEY	53.93	158.07	s_BAK21A [4788]	1164	35.4676	BASALT [4788]				QUATERNARY					VOL					WR [4788]	50.6703	0.981629	17.052	9.21449	9.58353	8.33879	0.192278	0.758992	2.94489	0.263117	100
[4788][24876]	Kamchatka Arc	KAMCHATKA ARC / KAMCHATKA ARC / CENTRAL KAMCHATKA SEGMENT / BAKENING	KOSTAKAN	53.93	158.07	s_BAK33 [4788] / s_BAK-95-33 [24876]	1164	35.4676	BASALT [4788] / NOT GIVEN [24876]				QUATERNARY					VOL					WR [4788]	51.5134	1.03388	16.8232	8.70722	9.09415	8.35136	0.170641	0.923467	3.15183	0.230867	100
[4788][24876]	Kamchatka Arc	KAMCHATKA ARC / KAMCHATKA ARC / CENTRAL KAMCHATKA SEGMENT / BAKENING	KAVYCHA VALLEY	53.93	158.07	s_BAK17 [4788] / s_BAK-95-17 [24876]	1164	35.4676	BASALT [4788] / NOT GIVEN [24876]				QUATERNARY					VOL					WR [4788]	51.7273	1.16116	16.4582	8.40945	8.9864	8.37047	0.161553	1.0198	3.41281	0.292815	100
[20395]	Kamchatka Arc	KAMCHATKA ARC / KAMCHATKA ARC / SOUTHERN KAMCHATKA SEGMENT / GORELY	EASTERN VOLCANIC FRONT, OLD GORELY	52.45	158.12	s_OG-700 [20395]	975	33.9952	BASALT [20395]				QUATERNARY					VOL					WR [20395]	51.3702	1.07378	16.5352	9.12463	9.12967	8.37853	0.166361	0.988082	2.98441	0.249138	100
[4788][24876]	Kamchatka Arc	KAMCHATKA ARC / KAMCHATKA ARC / CENTRAL KAMCHATKA SEGMENT / BAKENING	KAVYCHA VALLEY	53.93	158.07	s_BAK15 [4788] / s_BAK-95-15 [24876]	1164	35.4676	BASALT [4788] / NOT GIVEN [24876]				QUATERNARY					VOL					WR [4788]	50.6264	0.969506	16.9664	9.15929	9.60417	8.41249	0.191881	0.777625	3.02971	0.262575	100
[4276]	Kamchatka Arc	KAMCHATKA ARC / KAMCHATKA ARC / CENTRAL KAMCHATKA SEGMENT / KIZIMEN	EASTERN VOLCANIC FRONT	55.17	160.53	s_TAM-01 [4276]	1497	38.0616	BASALT [4276]				QUATERNARY					VOL					WR [4276]	52.2458	0.843658	16.0193	9.00694	9.38188	8.56872	0.193126	0.742012	2.76476	0.233785	100
[4788]	Kamchatka Arc	KAMCHATKA ARC / KAMCHATKA ARC / CENTRAL KAMCHATKA SEGMENT / BAKENING	LEVAYA AVACHA VALLEY	53.93	158.07	s_BAK61 [4788]	1164	35.4676	BASALT [4788]				QUATERNARY					VOL					WR [4788]	50.8426	1.06931	16.8467	9.028	9.14966	8.58474	0.161405	0.897816	3.18775	0.23202	100
[22526]	Kamchatka Arc	KAMCHATKA ARC / KAMCHATKA ARC / CENTRAL KAMCHATKA SEGMENT / AVACHA (AVACHINSKY)	EASTERN KAMCHATKAN VOLCANIC FRONT	53.291	158.751	s_AVA-17-08 [22526]	1273	36.3167	BASALT [22526]				QUATERNARY					VOL					WR [22526]	50.8283	1.01757	16.307	9.43669	9.59647	8.63782	0.181744	0.818845	2.96582	0.209704	100
[21486]	Kamchatka Arc	KAMCHATKA ARC / KAMCHATKA ARC / CENTRAL KAMCHATKA SEGMENT / TOLBACHIK	CENTRAL KAMCHATKA DEPRESSION, 1941 ERUPTION	55.7878	160.335	s_K01-52 [21486]	1860	40.8894	BASALT [21486]				QUATERNARY					VOL					WR [21486]	51.1987	1.26981	14.8314	9.33564	9.90451	8.64486	0.172694	1.36124	2.89516	0.386022	100
[4788]	Kamchatka Arc	KAMCHATKA ARC / KAMCHATKA ARC / CENTRAL KAMCHATKA SEGMENT / MOUNT PESCHANAJA		53.93	158.07	s_O-40 [4788]	1164	35.4676	BASALT [4788]				QUATERNARY					VOL					WR [4788]	50.0456	1.20664	16.9332	8.95871	9.65315	8.65767	0.160886	0.884872	3.25794	0.241329	100
[4788]	Kamchatka Arc	KAMCHATKA ARC / KAMCHATKA ARC / CENTRAL KAMCHATKA SEGMENT / BAKENING	LEVAYA AVACHA VALLEY	53.93	158.07	s_BAK62 [4788]	1164	35.4676	BASALT [4788]				QUATERNARY					VOL					WR [4788]	50.7418	1.07726	16.7629	9.05744	9.15164	8.66839	0.171153	0.916171	3.2217	0.23156	100
[22589]	Kamchatka Arc	KAMCHATKA ARC / KAMCHATKA ARC / CENTRAL KAMCHATKA SEGMENT / KAMEN	CENTRAL KAMCHATKA DEPRESSION	55.9974	160.5	s_KAM-08-68 [22589]	1860	40.8894	ANDESITE, BASALTIC [22589]				QUATERNARY					VOL					WR [22589]	52.99	0.91	15.16	8.68	9.66	8.7	0.17	0.76	2.81	0.16	100
[21668]	Kamchatka Arc	KAMCHATKA ARC / KAMCHATKA ARC / CENTRAL KAMCHATKA SEGMENT / TOLBACHIK	CENTRAL KAMCHATKA DEPRESSION, 1941 ERUPTION	55.7949	160.332	s_TOL-2 [21668]	2130	42.9927	BASALT [21668]				HOLOCENE			1941		VOL					WR [21668]	50.8794	1.22709	14.9147	9.70699	9.80576	8.73929	0.176582	1.33683	2.83329	0.380099	100
[18976]	Kamchatka Arc	KAMCHATKA ARC / KAMCHATKA ARC / CENTRAL KAMCHATKA SEGMENT / BEZYMIANNY	CENTRAL KAMCHATKA DEPRESSION, OCTOBER 2007 ERUPTION	55.9441	160.627	s_01BZT09C [18976]	1575	38.6693	BASALT [18976]				QUATERNARY					VOL					WR [18976]	51.0958	0.970679	13.4994	10.6875	11.6281	8.75613	0.230161	0.390273	2.50175	0.240168	100
[15882]	Kamchatka Arc	KAMCHATKA ARC / KAMCHATKA ARC / CENTRAL KAMCHATKA SEGMENT / SHISHEISKY COMPLEX		57.3811	161.179	s_G-202 [15882]	484	30.1704	NOT GIVEN [15882]				QUATERNARY [15882]					VOL					WR [15882]	53.4791	0.803662	17.0397	6.60224	8.31129	8.76907	0.122075	1.02747	3.66226	0.183113	100		0.16				0.01
[21668]	Kamchatka Arc	KAMCHATKA ARC / KAMCHATKA ARC / CENTRAL KAMCHATKA SEGMENT / TOLBACHIK	CENTRAL KAMCHATKA DEPRESSION, 1941 ERUPTION	55.7949	160.332	s_TOL-1 [21668]	2130	42.9927	BASALT [21668]				HOLOCENE			1941		VOL					WR [21668]	50.8239	1.23985	14.8882	9.74883	9.77983	8.77895	0.179978	1.34984	2.82966	0.380954	100
[22589]	Kamchatka Arc	KAMCHATKA ARC / KAMCHATKA ARC / CENTRAL KAMCHATKA SEGMENT / KAMEN	CENTRAL KAMCHATKA DEPRESSION	56.0005	160.513	s_KAM-08-01 [22589]	1970	41.7463	ANDESITE, BASALTIC [22589]				QUATERNARY					VOL					WR [22589]	52.96	0.9	15.11	8.67	9.69	8.78	0.17	0.75	2.81	0.16	100
[22589]	Kamchatka Arc	KAMCHATKA ARC / KAMCHATKA ARC / CENTRAL KAMCHATKA SEGMENT / KAMEN	CENTRAL KAMCHATKA DEPRESSION	55.9858	160.508	s_KAM-07-11 [22589]	1794	40.3753	ANDESITE, BASALTIC [22589]				QUATERNARY					VOL					WR [22589]	53.0147	0.889911	15.0685	8.60914	9.75902	8.80912	0.169983	0.729927	2.78972	0.159984	100
[4276][20793][7063]	Kamchatka Arc	KAMCHATKA ARC / KAMCHATKA ARC / CENTRAL KAMCHATKA SEGMENT / KLYUCHEVSKOY	WATER EAST OF CRATER OCHKI	56.05	160.63	s_KLU-03 [4276] / s_KLU-03 (280) [20793]	4200	59.118	BASALT [4276]				QUATERNARY					VOL					WR [4276]	53.4841	0.846583	15.2684	8.24033	9.36222	8.84431	0.159357	0.756945	2.87838	0.159357	100
[15882]	Kamchatka Arc	KAMCHATKA ARC / KAMCHATKA ARC / CENTRAL KAMCHATKA SEGMENT / SHISHEISKY COMPLEX		57.3811	161.179	s_K2-109 [15882]	484	30.1704	NOT GIVEN [15882]				QUATERNARY [15882]					VOL					WR [15882]	53.5451	0.799029	16.8605	6.55406	8.36452	8.86012	0.121371	1.04177	3.6816	0.171943	100		0.12				0.01
[4276]	Kamchatka Arc	KAMCHATKA ARC / KAMCHATKA ARC / CENTRAL KAMCHATKA SEGMENT / TOLBACHIK	CENTRAL KAMTCHATKA DEPRESSION	55.82	160.37	s_TOL-6/6 [4276]	2673	47.2227	BASALT [4276]				QUATERNARY					VOL					WR [4276]	51.5209	1.15271	14.5441	9.38731	10.3142	8.88085	0.180424	1.15271	2.54598	0.320753	100
[4788]	Kamchatka Arc	KAMCHATKA ARC / KAMCHATKA ARC / CENTRAL KAMCHATKA SEGMENT / BAKENING	KOSTAKAN	53.93	158.07	s_BAK37 [4788]	1164	35.4676	BASALT [4788]				QUATERNARY					VOL					WR [4788]	50.7284	1.09776	16.416	8.95682	9.33595	8.90289	0.17121	0.956759	3.17241	0.26185	100
[4788]	Kamchatka Arc	KAMCHATKA ARC / KAMCHATKA ARC / CENTRAL KAMCHATKA SEGMENT / BAKENING	LEVAYA AVACHA VALLEY	53.93	158.07	s_121 [4788]	1164	35.4676	BASALT [4788]				QUATERNARY					VOL					WR [4788]	51.0649	1.71224	15.9842	8.73785	8.23887	8.90362	0.15108	1.0777	3.68634	0.443167	100
[20395]	Kamchatka Arc	KAMCHATKA ARC / KAMCHATKA ARC / SOUTHERN KAMCHATKA SEGMENT / GORELY	EASTERN VOLCANIC FRONT, OLD GORELY	52.45	158.12	s_OG-701 [20395]	975	33.9952	BASALT [20395]				QUATERNARY					VOL					WR [20395]	51.0963	1.06791	16.1649	9.18665	9.07573	8.95472	0.166388	1.01245	2.96474	0.310188	100
[4788][24876]	Kamchatka Arc	KAMCHATKA ARC / KAMCHATKA ARC / CENTRAL KAMCHATKA SEGMENT / BAKENING	KAVYCHA VALLEY	53.93	158.07	s_BAK14 [4788] / s_BAK-95-14 [24876]	1164	35.4676	BASALT [4788] / NOT GIVEN [24876]				QUATERNARY					VOL					WR [4788]	50.5975	0.995459	16.5005	9.03109	9.79371	8.96919	0.180993	0.68375	3.01654	0.231268	100
[18976]	Kamchatka Arc	KAMCHATKA ARC / KAMCHATKA ARC / CENTRAL KAMCHATKA SEGMENT / BEZYMIANNY	CENTRAL KAMCHATKA DEPRESSION, OCTOBER 2007 ERUPTION	55.9441	160.627	s_01BZT09B [18976]	1575	38.6693	BASALT [18976]				QUATERNARY					VOL					WR [18976]	50.8534	1.01807	13.0352	11.039	11.7377	9.00289	0.239545	0.369298	2.37549	0.329374	100
[4788]	Kamchatka Arc	KAMCHATKA ARC / KAMCHATKA ARC / CENTRAL KAMCHATKA SEGMENT / BAKENING	LEVAYA AVACHA VALLEY	53.93	158.07	s_120 [4788]	1164	35.4676	BASALT [4788]				QUATERNARY					VOL					WR [4788]	51.0381	1.6112	16.062	8.68189	8.15608	9.03674	0.150112	1.09081	3.72278	0.450336	100
[21668][21486]	Kamchatka Arc	KAMCHATKA ARC / KAMCHATKA ARC / CENTRAL KAMCHATKA SEGMENT / TOLBACHIK	CENTRAL KAMCHATKA DEPRESSION, 1941 ERUPTION	55.7949	160.332	s_TOL-4 [21668]	2130	42.9927	BASALT [21668]				HOLOCENE			1941		VOL					WR [21668]	50.8754	1.20749	14.7716	9.61964	9.83095	9.05615	0.178104	1.31817	2.77722	0.365265	100
[4788][24876]	Kamchatka Arc	KAMCHATKA ARC / KAMCHATKA ARC / CENTRAL KAMCHATKA SEGMENT / BAKENING	KOSTAKAN	53.93	158.07	s_BAK30 [4788] / s_BAK-95-30 [24876]	1164	35.4676	BASALT [4788] / NOT GIVEN [24876]				QUATERNARY					VOL					WR [4788]	50.7424	1.08454	16.3585	8.91881	9.25875	9.08803	0.170714	0.943951	3.17328	0.261093	100
[15882]	Kamchatka Arc	KAMCHATKA ARC / KAMCHATKA ARC / CENTRAL KAMCHATKA SEGMENT / SHISHEISKY COMPLEX		57.3811	161.179	s_G-3277 [15882]	484	30.1704	NOT GIVEN [15882]				QUATERNARY [15882]					VOL					WR [15882]	56.7756	0.718551	15.3729	5.79901	6.23419	9.08815	0.101204	1.57879	4.11902	0.212529	100		0.13				0.01
[4276]	Kamchatka Arc	KAMCHATKA ARC / KAMCHATKA ARC / CENTRAL KAMCHATKA SEGMENT / TOLBACHIK	CENTRAL KAMTCHATKA DEPRESSION	55.82	160.37	s_TOL-6/3 [4276]	2673	47.2227	BASALT [4276]				QUATERNARY					VOL					WR [4276]	50.8643	1.21914	14.5598	9.53358	10.1828	9.09361	0.179874	1.28909	2.72808	0.349754	100
[24736]	Kamchatka Arc	KAMCHATKA ARC / KAMCHATKA ARC / CENTRAL KAMCHATKA SEGMENT / BAKENING	SATELLITE MONOGENETIC CONE FIELD	53.8331	158.049	s_BAK-16-18 [24736]	805	32.6709	NOT GIVEN [24736]				HOLOCENE [24736]					VOL					WR [24736]	50.753	1.09438	16.757	8.81526	9.09639	9.13655	0.170683	0.923695	2.99197	0.261044	100
[4788][24876]	Kamchatka Arc	KAMCHATKA ARC / KAMCHATKA ARC / CENTRAL KAMCHATKA SEGMENT / BAKENING	KOSTAKAN	53.93	158.07	s_BAK31 [4788] / s_BAK-95-31 [24876]	1164	35.4676	BASALT [4788] / NOT GIVEN [24876]				QUATERNARY					VOL					WR [4788]	50.5555	1.09641	16.1946	8.95791	9.37479	9.20379	0.170999	0.955585	3.22887	0.261528	100
[22526]	Kamchatka Arc	KAMCHATKA ARC / KAMCHATKA ARC / CENTRAL KAMCHATKA SEGMENT / KARCHINSKY	CENTRAL KAMCHATKA DEPRESSION	56.4197	160.859	s_7401 [22526]	433	29.7731	BASALT [22526]				QUATERNARY					VOL					WR [22526]	50.7304	0.994116	14.9929	9.10936	10.0122	9.21079	0.162305	1.22743	3.27653	0.284033	100		0.49				0.08
[4788][24876]	Kamchatka Arc	KAMCHATKA ARC / KAMCHATKA ARC / CENTRAL KAMCHATKA SEGMENT / BAKENING	LEVAYA AVACHA VALLEY	53.93	158.07	s_23/1 [4788]	1164	35.4676	BASALT [4788] / NOT GIVEN [24876]				QUATERNARY					VOL					WR [4788]	50.091	1.15672	15.8521	9.273	9.38451	9.22358	0.160935	1.36795	3.098	0.392279	100
[15882]	Kamchatka Arc	KAMCHATKA ARC / KAMCHATKA ARC / CENTRAL KAMCHATKA SEGMENT / SHISHEISKY COMPLEX		57.375	161.18	s_G-1304/1 [15882]	484	30.1704	NOT GIVEN [15882]				QUATERNARY [15882]					VOL					WR [15882]	54.5334	0.662927	15.9001	6.84345	7.64916	9.22998	0.122387	1.15247	3.74299	0.163182	100		0.17				0.01
[9813]	Kamchatka Arc	KAMCHATKA ARC / KAMCHATKA ARC / SOUTHERN KAMCHATKA SEGMENT / GORELY	GORELY / DVUGORBAYA, SOUTHERN KAMCHATKAN SUBDUCTION ZONE	52.531	158.134	s_N69 [9813]	969	33.9485	BASALT [9813]			UPPER [9813]	PLEISTOCENE [9813]					VOL					WR [9813]	50.8029	1.0605	16.059	9.27179	9.16069	9.31219	0.1717	0.939299	2.929	0.2929	100		0.18				0.02
[4788][24876]	Kamchatka Arc	KAMCHATKA ARC / KAMCHATKA ARC / CENTRAL KAMCHATKA SEGMENT / BAKENING	LEVAYA AVACHA VALLEY	53.93	158.07	s_23 [4788]	1164	35.4676	BASALT [4788] / NOT GIVEN [24876]				QUATERNARY					VOL					WR [4788]	49.9405	1.16561	15.8363	9.36353	9.37515	9.345	0.160774	1.35653	3.06476	0.391887	100
[22526]	Kamchatka Arc	KAMCHATKA ARC / KAMCHATKA ARC / CENTRAL KAMCHATKA SEGMENT / ZARECHNY	CENTRAL KAMCHATKA DEPRESSION	56.3547	160.789	s_K2-96B [22526]	14	26.5091	BASALT [22526]				QUATERNARY					VOL					WR [22526]	52.7411	0.84887	14.6531	8.57471	9.14556	9.37799	0.161689	1.22278	3.05189	0.222323	100		0.2				0.03
[22526]	Kamchatka Arc	KAMCHATKA ARC / KAMCHATKA ARC / CENTRAL KAMCHATKA SEGMENT / KARCHINSKY	CENTRAL KAMCHATKA DEPRESSION	56.4498	160.803	s_7424-1 [22526]	935	33.6837	BASALT [22526]				QUATERNARY					VOL					WR [22526]	52.2943	0.884427	14.12	8.7909	10.2532	9.43046	0.164545	0.822723	3.03379	0.205681	100		1.31				0.08
[4788][24876]	Kamchatka Arc	KAMCHATKA ARC / KAMCHATKA ARC / CENTRAL KAMCHATKA SEGMENT / MOUNT PESCHANAJA		53.93	158.07	s_O-26 [4788] / s_O-95-26 [24876]	1164	35.4676	BASALT [4788] / NOT GIVEN [24876]				QUATERNARY					VOL					WR [4788]	50.6651	1.10557	16.3624	8.7405	9.10585	9.44757	0.150759	0.904554	3.23629	0.281417	100
[2475][22052][2195]	Kamchatka Arc	KAMCHATKA ARC / KAMCHATKA ARC / CENTRAL KAMCHATKA SEGMENT / PLOSKIY	CENTRAL KAMCHATKA DEPRESSION	56.2	160.63	s_3/OB [2475] / s_3-PLOSKY/OB [22052]	1366	37.0411	BASALT [2475] / NOT GIVEN [22052]			UPPER [2475]	PLEISTOCENE [2475]				PHYRIC [2475]	VOL					WR [2475]	50.7423	1.16941	14.2363	9.70104	10.3722	9.59935	0.183038	1.17958	2.48119	0.33557	100
[20395]	Kamchatka Arc	KAMCHATKA ARC / KAMCHATKA ARC / SOUTHERN KAMCHATKA SEGMENT / GORELY	EASTERN VOLCANIC FRONT, OLD GORELY	52.45	158.12	s_OG-160 [20395]	975	33.9952	BASALT [20395]				QUATERNARY					VOL					WR [20395]	50.8146	1.06761	15.8253	9.36674	9.08976	9.60846	0.176256	0.949264	2.81254	0.289563	100
[12904]	Kamchatka Arc	KAMCHATKA ARC / KAMCHATKA ARC / CENTRAL KAMCHATKA SEGMENT / KLYUCHEVSKOY		56.1421	160.801	s_KLV 5/18A [12904]	513	30.3963	ANDESITE, BASALTIC [12904]				QUATERNARY					VOL					WR [12904]	53.6223	0.872968	14.9007	8.36845	8.87016	9.63275	0.160546	0.772627	2.62894	0.17058	100
[15882]	Kamchatka Arc	KAMCHATKA ARC / KAMCHATKA ARC / CENTRAL KAMCHATKA SEGMENT / SHISHEISKY COMPLEX		57.3811	161.179	s_G-1303 [15882]	484	30.1704	NOT GIVEN [15882]				QUATERNARY [15882]					VOL					WR [15882]	54.2895	0.644963	15.7248	7.17649	7.45291	9.64373	0.133088	1.11589	3.66503	0.153563	100		0.19				0.02
[24736]	Kamchatka Arc	KAMCHATKA ARC / KAMCHATKA ARC / CENTRAL KAMCHATKA SEGMENT / AVACHA (AVACHINSKY)	SATELLITE CONE (ëMEDVEZHKA^ CONE)	53.2358	158.678	s_AVX-16-02 [24736]	561	30.7702	NOT GIVEN [24736]				HOLOCENE [24736]					VOL					WR [24736]	49.5438	1.18319	16.0132	9.17477	10.0572	9.67613	0.180487	0.862328	3.06828	0.24065	100
[4276]	Kamchatka Arc	KAMCHATKA ARC / KAMCHATKA ARC / CENTRAL KAMCHATKA SEGMENT / TOLBACHIK	CENTRAL KAMTCHATKA DEPRESSION	55.82	160.37	s_201 [4276]	2673	47.2227	BASALT [4276]				QUATERNARY					VOL					WR [4276]	50.6766	1.19097	14.3017	9.78941	9.92135	9.6993	0.17158	1.27171	2.63425	0.34316	100
[15280]	Kamchatka Arc	KAMCHATKA ARC / KAMCHATKA ARC / CENTRAL KAMCHATKA SEGMENT / KARYMSKY	INTRA-CALDERA STAGE, MALYI SEMYACHIK, NORTHERN SECTOR	54.07	159.6	s_C608 [15280]	510	30.3729	BASALT [15280]				QUATERNARY					VOL					WR [15280]	48.4913	0.789464	17.014	11.2562	9.69623	9.74684	0.192305	0.425096	2.25706	0.131577	100
[2475][2195]	Kamchatka Arc	KAMCHATKA ARC / KAMCHATKA ARC / EASTERN KAMCHATKA SEGMENT / MALYI SEMYACHIK	EASTERN VOLCANIC FRONT	54.12	159.88	s_C-608 [2475]	200	27.958	ANDESITE [2475]				QUATERNARY					VOL					WR [2475]	49.6238	0.742323	16.7785	10.6162	9.50783	9.77222	0.203376	0.396583	2.22697	0.132194	100
[4276]	Kamchatka Arc	KAMCHATKA ARC / KAMCHATKA ARC / CENTRAL KAMCHATKA SEGMENT / TOLBACHIK	CENTRAL KAMTCHATKA DEPRESSION	55.82	160.37	s_655 [4276]	2673	47.2227	BASALT [4276]				QUATERNARY					VOL					WR [4276]	51.0803	0.961679	13.585	9.19727	11.7426	9.78888	0.17209	0.86045	2.39914	0.212582	100
[2475][2195]	Kamchatka Arc	KAMCHATKA ARC / KAMCHATKA ARC / CENTRAL KAMCHATKA SEGMENT / TOLBACHIK	CENTRAL KAMCHATKA DEPRESSION	55.615	160.27	s_TB-9-7-75 [2475]	582	30.9338	BASALT [2475]				HOLOCENE			1975	PHYRIC [2475]	VOL					WR [2475]	50.5904	0.936482	13.4365	9.34446	12.3168	9.82288	0.193404	0.763436	2.41246	0.183225	100
[4788][24876]	Kamchatka Arc	KAMCHATKA ARC / KAMCHATKA ARC / CENTRAL KAMCHATKA SEGMENT / BAKENING	LEVAYA AVACHA VALLEY	53.93	158.07	s_BAK24 [4788] / s_BAK-95-24 [24876]	1164	35.4676	BASALT [4788] / NOT GIVEN [24876]				QUATERNARY					VOL					WR [4788]	49.9279	1.03514	16.3009	9.16903	9.71825	9.87905	0.170848	0.703493	2.88432	0.211048	100
[3317]	Kamchatka Arc	KAMCHATKA ARC / KAMCHATKA ARC / CENTRAL KAMCHATKA SEGMENT / TOLBACHIK	CENTRAL KAMCHATKA DEPRESSION	55.615	160.27	s_1 [3317]	582	30.9338	BASALT [3317]				HOLOCENE			1975		VOL					WR [3317]	50.0788	1.02654	13.5664	9.80581	11.6743	9.9433	0.161025	1.0366	2.45563	0.251602	100			0.13	0.18
[15882]	Kamchatka Arc	KAMCHATKA ARC / KAMCHATKA ARC / CENTRAL KAMCHATKA SEGMENT / SHISHEISKY COMPLEX		57.3811	161.179	s_G∑1286 [15882]	484	30.1704	NOT GIVEN [15882]				QUATERNARY [15882]					VOL					WR [15882]	53.8485	0.73402	14.9658	7.58487	8.39025	9.96024	0.142726	1.11122	3.06861	0.1937	100		0.35				0.03
[22526]	Kamchatka Arc	KAMCHATKA ARC / KAMCHATKA ARC / CENTRAL KAMCHATKA SEGMENT / KARCHINSKY	CENTRAL KAMCHATKA DEPRESSION	56.5486	160.873	s_K2-83 A [22526]	18	26.5402	BASALT [22526]				QUATERNARY					VOL					WR [22526]	50.7447	0.920057	14.2761	9.56141	10.1408	9.97908	0.171879	1.05149	2.93205	0.222431	100		0.33				0.06
[2475][2195]	Kamchatka Arc	KAMCHATKA ARC / KAMCHATKA ARC / CENTRAL KAMCHATKA SEGMENT / AVACHA (AVACHINSKY)	EASTERN VOLCANIC FRONT	53.256	158.836	s_29M [2475]	2320	44.4728	BASALT [2475]				QUATERNARY					VOL					WR [2475]	49.486	1.15904	15.6219	9.615	10.1794	10.0383	0.181415	0.776053	2.70107	0.241887	100
[15280]	Kamchatka Arc	KAMCHATKA ARC / KAMCHATKA ARC / CENTRAL KAMCHATKA SEGMENT / KARYMSKY	PRE-CALDERA STAGE, STENA, NORTHERN SECTOR	54.07	159.6	s_C567 [15280]	510	30.3729	BASALT [15280]				QUATERNARY					VOL					WR [15280]	47.6565	0.757735	16.3368	11.7087	10.6487	10.4062	0.202063	0.262682	1.9398	0.0808251	100
[19739]	Kamchatka Arc	KAMCHATKA ARC / KAMCHATKA ARC / CENTRAL KAMCHATKA SEGMENT / SHIVELUCH (SHEVELUCH)	NORTHERN CENTRAL KAMTCHATKA DEPRESSION, SHIVELUCH VOLCANIC MASSIF	56.63	161.32	s_753/3 [19739]	2196	43.5068	BASALT [19739]				QUATERNARY					VOL					WR [19739]	51.6796	0.870948	14.958	8.61833	8.37528	10.4412	0.165075	1.77228	2.72424	0.394965	100
[4276][7063]	Kamchatka Arc	KAMCHATKA ARC / KAMCHATKA ARC / CENTRAL KAMCHATKA SEGMENT / ZARECHNY	NORTHERN CENTRAL KAMTCHATKA DEPRESSION	56.38	160.83	s_90093 [4276]	579	30.9104	BASALT [4276]				QUATERNARY					VOL					WR [4276]	52.2156	0.858312	13.7734	9.02908	9.44143	10.532	0.171662	1.06027	2.7264	0.191858	100
[20395]	Kamchatka Arc	KAMCHATKA ARC / KAMCHATKA ARC / SOUTHERN KAMCHATKA SEGMENT / GORELY	EASTERN VOLCANIC FRONT, OLD GORELY	52.45	158.12	s_OG-706 [20395]	975	33.9952	BASALT [20395]				QUATERNARY					VOL					WR [20395]	49.9818	1.01138	15.7427	9.51648	9.09026	10.5592	0.168057	0.846359	2.80432	0.27942	100
[20395]	Kamchatka Arc	KAMCHATKA ARC / KAMCHATKA ARC / SOUTHERN KAMCHATKA SEGMENT / GORELY	EASTERN VOLCANIC FRONT, OLD GORELY	52.45	158.12	s_OG-703 [20395]	975	33.9952	BASALT [20395]				QUATERNARY					VOL					WR [20395]	49.9344	1.00069	15.815	9.49703	9.11115	10.5867	0.167947	0.847735	2.75914	0.280212	100
[19553]	Kamchatka Arc	KAMCHATKA ARC / KAMCHATKA ARC / CENTRAL KAMCHATKA SEGMENT / SHIVELUCH (SHEVELUCH)	CENTRAL KAMCHATKA DEPRESSION	56.62	161.365	s_K1-18B [19553]	1215	35.8649	ANDESITE, BASALTIC [19553]	3959 [19553]	3959 [19553]		QUATERNARY					VOL					WR [19553]	52.108	0.86589	13.9058	8.38058	8.9063	10.6484	0.164931	1.98949	2.60798	0.422637	100
[15433]	Kamchatka Arc	KAMCHATKA ARC / KAMCHATKA ARC / CENTRAL KAMCHATKA SEGMENT / STUDENAYA		56.523	161.406	s_K1-18B [15433]	481	30.147	BASALT, OLIVINE-CLINOPYROXENE-HORNBLENDE [15433]				HOLOCENE [15433]					VOL					WR [15433]	52.108	0.86589	13.9058	8.38058	8.9063	10.6484	0.164931	1.98949	2.60798	0.422637	100		0.86				0.15
[15882]	Kamchatka Arc	KAMCHATKA ARC / KAMCHATKA ARC / CENTRAL KAMCHATKA SEGMENT / SHISHEISKY COMPLEX		57.3811	161.179	s_G-1305 [15882]	484	30.1704	NOT GIVEN [15882]				QUATERNARY [15882]					VOL					WR [15882]	53.1867	0.740132	14.7718	7.7097	8.11061	10.7525	0.143914	1.06908	3.03248	0.483141	100		0.54				0.12
[15882]	Kamchatka Arc	KAMCHATKA ARC / KAMCHATKA ARC / CENTRAL KAMCHATKA SEGMENT / SHISHEISKY COMPLEX		57.3811	161.179	s_G-206 [15882]	484	30.1704	NOT GIVEN [15882]				QUATERNARY [15882]					VOL					WR [15882]	50.7414	0.863295	15.133	8.59232	10.0752	10.7861	0.162503	0.7922	2.63051	0.223441	100		0.38				0.04
[20395]	Kamchatka Arc	KAMCHATKA ARC / KAMCHATKA ARC / SOUTHERN KAMCHATKA SEGMENT / GORELY	EASTERN VOLCANIC FRONT, OLD GORELY	52.45	158.12	s_OG-702 [20395]	975	33.9952	BASALT [20395]				QUATERNARY					VOL					WR [20395]	49.8443	1.00768	15.7258	9.64926	8.85228	10.9318	0.166928	0.84889	2.72785	0.245201	100
[22526]	Kamchatka Arc	KAMCHATKA ARC / KAMCHATKA ARC / CENTRAL KAMCHATKA SEGMENT / AVACHA (AVACHINSKY)	EASTERN KAMCHATKAN VOLCANIC FRONT	53.2891	158.787	s_AVA-17-06 [22526]	1214	35.8571	BASALT [22526]				QUATERNARY					VOL					WR [22526]	49.396	0.944395	14.8847	9.87322	10.5021	10.9414	0.192672	0.65888	2.43586	0.17071	100
[10896][10990]	Kamchatka Arc	KAMCHATKA ARC / KAMCHATKA ARC / CENTRAL KAMCHATKA SEGMENT / KLYUCHEVSKOY		56.05	160.63	s_K1938 [10896] / s_KHU-3(K1938) [10990]	4200	59.118	NOT GIVEN [10896] / BASALT [10990]				QUATERNARY					VOL					WR [10896]	51.9086	0.824584	13.9375	8.72256	10.1665	10.9609	0.17095	0.593298	2.59442	0.120671	100
[20395]	Kamchatka Arc	KAMCHATKA ARC / KAMCHATKA ARC / SOUTHERN KAMCHATKA SEGMENT / GORELY	EASTERN VOLCANIC FRONT, OLD GORELY	52.45	158.12	s_OG-704 [20395]	975	33.9952	BASALT [20395]				QUATERNARY					VOL					WR [20395]	49.8861	0.981645	15.6742	9.56526	8.99255	10.992	0.168799	0.802799	2.74298	0.193717	100
[20395]	Kamchatka Arc	KAMCHATKA ARC / KAMCHATKA ARC / SOUTHERN KAMCHATKA SEGMENT / GORELY	EASTERN VOLCANIC FRONT, OLD GORELY	52.45	158.12	s_OG-167 [20395]	975	33.9952	BASALT [20395]				QUATERNARY					VOL					WR [20395]	49.6884	0.971956	15.7411	9.56823	9.1347	11.0105	0.173761	0.793941	2.63239	0.285007	100
[2475][2195]	Kamchatka Arc	KAMCHATKA ARC / KAMCHATKA ARC / CENTRAL KAMCHATKA SEGMENT / TOLBACHIK	CENTRAL KAMCHATKA DEPRESSION	55.615	160.27	s_T-889 [2475] / s_T889 [2195]	582	30.9338	BASALT [2475]				HOLOCENE			1975	PHYRIC [2475]	VOL					WR [2475]	50.6533	1.26633	13.0653	10.3116	9.49749	11.0553	0.190955	1.24623	2.36181	0.351759	100
[22526]	Kamchatka Arc	KAMCHATKA ARC / KAMCHATKA ARC / CENTRAL KAMCHATKA SEGMENT / KARCHINSKY	CENTRAL KAMCHATKA DEPRESSION	56.5288	160.869	s_K2-85 [22526]	25	26.5947	BASALT [22526]				QUATERNARY					VOL					WR [22526]	50.513	0.895193	13.9207	9.30391	9.99799	11.1245	0.170992	1.03601	2.81634	0.221284	100		0.22				0.03
[19739]	Kamchatka Arc	KAMCHATKA ARC / KAMCHATKA ARC / CENTRAL KAMCHATKA SEGMENT / SHIVELUCH (SHEVELUCH)	NORTHERN CENTRAL KAMTCHATKA DEPRESSION, SHIVELUCH VOLCANIC MASSIF	56.63	161.32	s_2010/B1 [19739]	2196	43.5068	BASALT [19739]				QUATERNARY					VOL					WR [19739]	51.8955	0.78706	15.4587	8.18341	8.03205	11.15	0.154385	0.877875	3.33996	0.121086	100
[15280]	Kamchatka Arc	KAMCHATKA ARC / KAMCHATKA ARC / CENTRAL KAMCHATKA SEGMENT / KARYMSKY	PRE-CALDERA STAGE, STENA, NORTHERN SECTOR	54.07	159.6	s_C564 [15280]	510	30.3729	BASALT [15280]				QUATERNARY					VOL					WR [15280]	47.6572	0.64388	16.3183	11.0439	10.7749	11.1673	0.191152	0.311879	1.82097	0.0704244	100
[4276][2481][7063]	Kamchatka Arc	KAMCHATKA ARC / KAMCHATKA ARC / CENTRAL KAMCHATKA SEGMENT / KHARCHINSKY	NORTHERN CENTRAL KAMTCHATKA DEPRESSION	56.65	161.4	s_8840 [4276]	1850	40.8115	BASALT [4276]				QUATERNARY					VOL					WR [4276]	50.9611	0.905706	13.9479	8.96649	9.68099	11.3716	0.161014	0.956023	2.85801	0.191205	100
[12904]	Kamchatka Arc	KAMCHATKA ARC / KAMCHATKA ARC / CENTRAL KAMCHATKA SEGMENT / KLYUCHEVSKOY		56.1421	160.801	s_KLV 5/8 [12904]	513	30.3963	ANDESITE, BASALTIC [12904]				QUATERNARY					VOL					WR [12904]	51.9895	0.818017	14.0073	8.63462	9.87679	11.4118	0.171682	0.565542	2.38336	0.141386	100
[19739]	Kamchatka Arc	KAMCHATKA ARC / KAMCHATKA ARC / CENTRAL KAMCHATKA SEGMENT / SHIVELUCH (SHEVELUCH)	NORTHERN CENTRAL KAMTCHATKA DEPRESSION, SHIVELUCH VOLCANIC MASSIF	56.63	161.32	s_776/21 [19739]	2196	43.5068	BASALT [19739]				QUATERNARY					VOL					WR [19739]	51.4592	0.83813	14.6218	8.78522	8.98718	11.6025	0.171665	0.747248	2.60527	0.181763	100
[15882]	Kamchatka Arc	KAMCHATKA ARC / KAMCHATKA ARC / CENTRAL KAMCHATKA SEGMENT / SHISHEISKY COMPLEX		57.3811	161.179	s_G-200 [15882]	484	30.1704	NOT GIVEN [15882]				QUATERNARY [15882]					VOL					WR [15882]	53.0266	0.802356	14.1073	7.99309	7.87122	11.69	0.14219	1.06642	3.11802	0.182815	100		0.14				0.01
[19739]	Kamchatka Arc	KAMCHATKA ARC / KAMCHATKA ARC / CENTRAL KAMCHATKA SEGMENT / SHIVELUCH (SHEVELUCH)	NORTHERN CENTRAL KAMTCHATKA DEPRESSION, SHIVELUCH VOLCANIC MASSIF	56.63	161.32	s_735-2A [19739]	2196	43.5068	ANDESITE, BASALTIC [19739]				QUATERNARY					VOL					WR [19739]	52.5689	0.837791	13.6166	8.41829	8.01454	11.6988	0.161502	1.85727	2.49319	0.333098	100
[19739]	Kamchatka Arc	KAMCHATKA ARC / KAMCHATKA ARC / CENTRAL KAMCHATKA SEGMENT / SHIVELUCH (SHEVELUCH)	NORTHERN CENTRAL KAMTCHATKA DEPRESSION, SHIVELUCH VOLCANIC MASSIF	56.63	161.32	s_773/1 [19739]	2196	43.5068	BASALT [19739]				QUATERNARY					VOL					WR [19739]	51.9502	0.800324	13.1902	8.87448	8.4186	11.8225	0.162091	1.80326	2.61372	0.364705	100
[15433]	Kamchatka Arc	KAMCHATKA ARC / KAMCHATKA ARC / CENTRAL KAMCHATKA SEGMENT / STUDENAYA		56.6135	161.252	s_7550-1 [15433]	1734	39.9079	ANDESITE, OLIVINE-CLINOPYROXENE-HORNBLENDE [15433]				HOLOCENE [15433]					VOL					WR [15433]	52.0269	0.825015	13.0067	8.46405	8.54553	12.0391	0.162966	1.93522	2.62783	0.366673	100		0.24				0.03
[22526]	Kamchatka Arc	KAMCHATKA ARC / KAMCHATKA ARC / CENTRAL KAMCHATKA SEGMENT / SHIVELUCH (SHEVELUCH)	CENTRAL KAMCHATKA DEPRESSION	56.6134	161.251	s_SHIV-10-24 [22526]	1734	39.9079	BASALT [22526]				QUATERNARY					VOL					WR [22526]	52.3045	0.805231	12.9873	8.16401	8.52956	12.0734	0.162468	1.89884	2.72134	0.353368	100		0.42				0
[22526]	Kamchatka Arc	KAMCHATKA ARC / KAMCHATKA ARC / CENTRAL KAMCHATKA SEGMENT / KARCHINSKY	CENTRAL KAMCHATKA DEPRESSION	56.4455	160.797	s_7423-1 [22526]	935	33.6837	BASALT [22526]				QUATERNARY					VOL					WR [22526]	52.508	0.894848	13.3713	8.09811	8.26963	12.1267	0.133713	1.27542	3.0754	0.246855	100		1.42				0.14
[4276][2475]	Kamchatka Arc	KAMCHATKA ARC / KAMCHATKA ARC / CENTRAL KAMCHATKA SEGMENT / KHARCHINSKY	CENTRAL KAMTCHATKA DEPRESSION	56.4529	160.809	s_8837 [4276]	887	33.3097	BASALT [4276] / ANDESITE, BASALTIC [2475]				PLEISTOCENE [2475]					VOL					WR [4276]	50.5603	0.88844	13.5891	8.8844	9.71227	12.4079	0.161535	0.898536	2.7158	0.181726	100
[22526]	Kamchatka Arc	KAMCHATKA ARC / KAMCHATKA ARC / CENTRAL KAMCHATKA SEGMENT / ZARECHNY	CENTRAL KAMCHATKA DEPRESSION	56.502	160.774	s_K2-92 [22526]	25	26.5947	BASALT [22526]				QUATERNARY					VOL					WR [22526]	53.2786	0.67916	11.8802	8.18156	7.785	14.3536	0.141914	0.993399	2.53418	0.172324	100		0.25				0.03
[6437]	Kermadec Arc	KERMADEC ARC / KERMADEC ISLANDS / MACAULEY / SANDY BAY TEPHRA	SANDY BAY TEPHRA	-30.234	-178.43	s_45656 [6437]	62	26.883	BASALT [6437]				QUATERNARY					VOL					WR [6437]	50.4613	0.882261	15.0289	11.8448	12.1083	7.03781	0.233242	0.486765	1.80509	0.11155	100			0.37	0.47		0.16
[20997][2770][3371][20959][10608][2478]	Kermadec Arc	KERMADEC ARC / KERMADEC ISLANDS / MACAULEY		-30.234	-178.43	s_10380 [20997]	62	26.883	BASALT [20997] / BASALT, THOLEIITIC [10608]				QUATERNARY					VOL					WR [20997]	49.3225	0.87452	15.1238	12.2494	12.2595	7.1607	0.232596	0.461129	2.14313	0.172669	100		0.4
[20997][3371][14131][4591]	Kermadec Arc	KERMADEC ARC / KERMADEC ISLANDS / RAOUL / RAOUL / BOAT COVE FORMATION - WILSON MEMBER		-29.267	-177.929	s_23374 [20997]	186	27.8489	ANDESITE, BASALTIC [20997] / BASALT [14131] / NOT GIVEN [4591]				QUATERNARY					VOL					WR [20997]	52.8716	0.605779	15.9384	8.98049	11.9234	7.24103	0.194173	0.254852	1.86082	0.129449	100			0.94	0.15
[20997][2770][14131][3371]	Kermadec Arc	KERMADEC ARC / KERMADEC ISLANDS / RAOUL / HERALD / BOAT COVE FORMATION		-29.267	-177.929	s_14782 [20997]	186	27.8489	BASALT [20997]				QUATERNARY					VOL					WR [20997]	49.7796	0.734987	16.298	10.9739	12.2871	7.49239	0.204616	0.119105	1.96472	0.145572	100		1.28		0.8
[3319]	Kermadec Arc	KERMADEC ARC / KERMADEC ISLANDS / MACAULEY		-30.234	-178.43	s_AU37556(K12) [3319]	62	26.883	BASALT [3319]				QUATERNARY					VOL					WR [3319]	49.5795	0.455508	17.2992	7.59261	15.6594	7.75376	0.141714	0.101224	1.36652	0.050612	100
[3319]	Kermadec Arc	KERMADEC ARC / KERMADEC ISLANDS / MACAULEY		-30.234	-178.43	s_AU37546 [3319]	62	26.883	BASALT [3319]				QUATERNARY					VOL					WR [3319]	48.2155	0.518446	17.3181	10.0297	14.1476	8.03591	0.169492	0.159522	1.24626	0.159522	100
[3319]	Kermadec Arc	KERMADEC ARC / KERMADEC ISLANDS / MACAULEY		-30.234	-178.43	s_AU37548 [3319]	62	26.883	BASALT [3319]				QUATERNARY					VOL					WR [3319]	48.8394	0.52483	17.5011	9.14391	14.2814	8.0844	0.181672	0.161486	1.24142	0.0403715	100
[3319]	Kermadec Arc	KERMADEC ARC / KERMADEC ISLANDS / MACAULEY		-30.234	-178.43	s_AU37560 [3319]	62	26.883	BASALT [3319]				QUATERNARY					VOL					WR [3319]	49.0222	0.365762	17.648	8.05162	15.3823	8.29059	0.142241	0.0914404	0.975364	0.0304801	100
[6437]	Kermadec Arc	KERMADEC ARC / KERMADEC ISLANDS / MACAULEY / SANDY BAY TEPHRA	SANDY BAY TEPHRA	-30.234	-178.43	s_45634C [6437]	62	26.883	BASALT [6437]				QUATERNARY					VOL					WR [6437]	50.2035	0.610006	16.155	9.54623	12.9016	8.61126	0.183002	0.122001	1.61652	0.0508339	100			0.55	0.43		0.06
[6437]	Kermadec Arc	KERMADEC ARC / KERMADEC ISLANDS / MACAULEY / SANDY BAY TEPHRA	SANDY BAY TEPHRA	-30.234	-178.43	s_45665 [6437]	62	26.883	BASALT [6437]				QUATERNARY					VOL					WR [6437]	49.7346	0.459655	16.5884	8.24273	13.3096	9.72425	0.163433	0.255364	1.46068	0.0612873	100			0.39	0.33		0.92
[13460][9592]	Kermadec Arc	KERMADEC ARC / KERMADEC ISLANDS / RAOUL / RAOUL		-29.268	-177.929	s_7135 [13460]	186	27.8489	BASALT [13460]				QUATERNARY				PORPHYRITIC [13460]	VOL					WR [13460]	48.4161	0.566626	15.734	10.0886	13.4877	10.4219	0.18213	0.111301	0.941004	0.0505916	100				0.03
[13520]	Lesser Antilles Arc	LESSER ANTILLES / LESSER ANTILLES / GUADELOUPE		16.008	-61.665	s_GUAD510 [13520]	452	29.9211	BASALT [13520]				QUATERNARY					VOL					WR [13520]	47.2242	0.859541	18.5054	9.30327	15.1279	7.14936	0.151684	0.262918	1.35504	0.0606735	100
[4679]	Lesser Antilles Arc	LESSER ANTILLES / LESSER ANTILLES / GRENADA / MOUNT GRANBY / C-SERIES	FEDON^S CAMP	12.117	-61.722	s_GD21 [4679]	474	30.0925	BASALT [4679]				Quaternary					VOL					WR [4679]	47.421	1.00939	16.5338	9.52862	14.949	7.21712	0.171596	0.9892	1.98849	0.191784	100
[22786][24806]	Lesser Antilles Arc	LESSER ANTILLES / LESSER ANTILLES / ST. VINCENT / LA SOUFRIERE	1902-1903 ERUPTION	13.333	-61.183	s_SVG44 [22786]	831	32.8735	NOT GIVEN [22786]				QUATERNARY					VOL					WR [22786]	51.3565	0.92056	17.6703	8.2211	10.7179	7.71362	0.172542	0.40598	2.70992	0.111645	100
[19445]	Lesser Antilles Arc	LESSER ANTILLES / LESSER ANTILLES / DOMINICA	SOUTHERN DOME, PLAT PAYS (DEPRESSION MARGIN), NE EDGE OF DEPRESSION MARGIN	15.236	-61.3435	s_19X [19445]	218	28.0982	BASALT [19445]				QUATERNARY					VOL					WR [19445]	51.49	0.810866	17.1295	7.66268	12.2643	7.80458	0.101358	0.608149	2.02716	0.101358	100		0.15
[22786][24806]	Lesser Antilles Arc	LESSER ANTILLES / LESSER ANTILLES / ST. VINCENT / LA SOUFRIERE	1902-1903 ERUPTION	13.333	-61.183	s_7 [22786]	831	32.8735	NOT GIVEN [22786]				QUATERNARY					VOL					WR [22786]	51.6729	0.92133	17.4922	8.56023	10.1577	7.83683	0.173817	0.401889	2.69266	0.090425	100
[22786][24806]	Lesser Antilles Arc	LESSER ANTILLES / LESSER ANTILLES / ST. VINCENT / LA SOUFRIERE	1902-1903 ERUPTION	13.333	-61.183	s_SVG72 [22786]	831	32.8735	NOT GIVEN [22786]				QUATERNARY					VOL					WR [22786]	51.0087	0.940322	17.8108	8.22656	10.7508	7.85446	0.169962	0.402277	2.72543	0.110626	100
[22786][24806]	Lesser Antilles Arc	LESSER ANTILLES / LESSER ANTILLES / ST. VINCENT / LA SOUFRIERE	1902-1903 ERUPTION	13.333	-61.183	s_SVG42 [22786]	831	32.8735	NOT GIVEN [22786]				QUATERNARY					VOL					WR [22786]	51.5265	0.911622	17.3686	8.28286	10.5289	7.98813	0.171755	0.396358	2.71352	0.111793	100
[3472][3325]	Lesser Antilles Arc	LESSER ANTILLES / LESSER ANTILLES / BEQUIA (THE GRENADINES)		12.995	-61.248	s_BQ5 [3472]	63	26.8908	BASALT [3472]				PLIOCENE				INTERGRANULAR [3472]	VOL					WR [3472]	50.5993	0.743445	16.8732	9.19336	11.2284	8.0787	0.240316	0.328261	2.61791	0.0971489	100
[3342]	Lesser Antilles Arc	LESSER ANTILLES / LESSER ANTILLES / ST. VINCENT / LA SOUFRIERE		13.25	-61.15	s_SV18 [3342]	233	28.2151	NOT GIVEN [3342]				PREHISTORIC [3342]					VOL					WR [3342]	52.0844	0.868073	17.2101	8.26688	10.1948	8.13566	0.171596	0.373473	2.58403	0.111033	100
[4679]	Lesser Antilles Arc	LESSER ANTILLES / LESSER ANTILLES / GRENADA	MT. MAITLAND	12.075	-61.735	s_GD5 [4679]	163	27.6698	BASALT [4679]				Quaternary					VOL					WR [4679]	48.013	1.0062	15.4284	9.71643	11.9118	10.6617	0.172782	0.498018	2.4596	0.132127	100
[2494][13520]	Lesser Antilles Arc	LESSER ANTILLES / LESSER ANTILLES / THE GRENADINES	ILE DE CAILLE	12.287	-61.581	s_RW35 [2494] / s_RW 35 [13520]	0	26.4	BASALT [2494] / NOT GIVEN [13520]	1000 [2494]	1000 [2494]		QUATERNARY					VOL					WR [2494]	48.2515	0.920245	16.0225	8.67076	12.0143	11.0327	0.163599	0.480573	2.31084	0.132924	100
[3325][3342]	Lesser Antilles Arc	LESSER ANTILLES / LESSER ANTILLES / ST. VINCENT / LA SOUFRIERE		13.25	-61.15	s_SV19 [3325]	233	28.2151	BASALT [3325] / NOT GIVEN [3342]				PREHISTORIC [3342]					VOL					WR [3325]	49.8799	0.871045	17.6211	7.69924	8.23989	11.2535	0.180216	0.610733	3.48418	0.160192	100
[2494][13520]	Lesser Antilles Arc	LESSER ANTILLES / LESSER ANTILLES / GRENADA		12.125	-61.625	s_GDA014 [2494]	66	26.9141	BASALT [2494] / NOT GIVEN [13520]		10000 [2494]		QUATERNARY					VOL					WR [2494]	48.639	0.985172	15.3057	8.80561	10.9486	11.8322	0.172659	0.639854	2.48832	0.182815	100
[2494][7092]	Lesser Antilles Arc	LESSER ANTILLES / LESSER ANTILLES / THE GRENADINES	ILE DE CAILLE	12.287	-61.581	s_RW33 [2494]	0	26.4	BASALT [2494] / NOT GIVEN [7092]	1000 [2494]	1000 [2494]		QUATERNARY					VOL					WR [2494]	48.7138	0.884596	15.5669	8.57143	11.2761	11.8353	0.162684	0.549059	2.32842	0.111845	100
[3396][3290][2773]	Lesser Antilles Arc	LESSER ANTILLES / LESSER ANTILLES / GRENADA / MOUNT ST. CATHERINE		12.177	-61.668	s_314 [3396]	427	29.7263	PICRITE [3396] / BASALT, ALKALINE, OLIVINE [3290]	500000 [2773]	2000000 [2773]		QUATERNARY					VOL					WR [3396]	46.7502	1.06126	14.6482	9.53504	13.0726	12.2695	0.179926	0.501149	1.6976	0.284628	100
[4679]	Lesser Antilles Arc	LESSER ANTILLES / LESSER ANTILLES / GRENADA	MT. MAITLAND	12.075	-61.735	s_AMG6157 [4679]	163	27.6698	PICRITE [4679]				Quaternary					VOL					WR [4679]	48.1938	0.895492	13.6664	9.18897	11.8347	13.0152	0.183169	0.763203	2.10644	0.152641	100
[4679]	Lesser Antilles Arc	LESSER ANTILLES / LESSER ANTILLES / GRENADA	MT. MAITLAND	12.117	-61.722	s_GD16 [4679]	474	30.0925	PICRITE [4679]				Quaternary					VOL					WR [4679]	45.4214	0.920773	14.4288	9.01548	12.8503	13.7104	0.182131	0.68805	2.41829	0.364262	100
[4679]	Lesser Antilles Arc	LESSER ANTILLES / LESSER ANTILLES / GRENADA	FEDON^S CAMP	12.117	-61.722	s_GD12 [4679]	474	30.0925	PICRITE [4679]				Quaternary					VOL					WR [4679]	46.0414	1.16728	13.4592	9.44986	12.6979	13.8652	0.172554	1.04547	1.80674	0.294356	100
[4679]	Lesser Antilles Arc	LESSER ANTILLES / LESSER ANTILLES / GRENADA	MT. MAITLAND	12.117	-61.722	s_GD8 [4679]	474	30.0925	PICRITE [4679]				Quaternary					VOL					WR [4679]	47.2236	0.87621	14.6307	9.3836	11.1462	14.1212	0.173204	0.366786	1.96638	0.112073	100
[4679]	Lesser Antilles Arc	LESSER ANTILLES / LESSER ANTILLES / GRENADA	MT. MAITLAND	12.117	-61.722	s_GD11 [4679]	474	30.0925	PICRITE [4679]				Quaternary					VOL					WR [4679]	47.2757	0.870974	14.7762	9.26676	10.9378	14.2394	0.172169	0.405104	1.9445	0.111404	100
[3396][3290][3325][2773]	Lesser Antilles Arc	LESSER ANTILLES / LESSER ANTILLES / GRENADA / MOUNT GRANBY	FEDON^S CAMP	12.102	-61.713	s_509 [3396]	379	29.3524	PICRITE [3396] / BASANITOID [3290] / BASALT [3325]	2000000 [2773]	5000000 [2773]		QUATERNARY				OLIVINE-MICROPHYRIC [3325]	VOL					WR [3396]	46.2461	1.08993	12.8986	9.61051	11.5488	14.3092	0.179626	1.27159	2.43561	0.409994	100
[4679]	Lesser Antilles Arc	LESSER ANTILLES / LESSER ANTILLES / GRENADA	MT. MAITLAND	12.117	-61.722	s_GD10 [4679]	474	30.0925	PICRITE [4679]				Quaternary					VOL					WR [4679]	47.1842	0.862506	14.551	9.40639	11.0401	14.3582	0.172501	0.395738	1.92796	0.101471	100
[4679]	Lesser Antilles Arc	LESSER ANTILLES / LESSER ANTILLES / GRENADA	MT. MAITLAND	12.117	-61.722	s_GD14 [4679]	474	30.0925	PICRITE [4679]				Quaternary					VOL					WR [4679]	46.4903	0.888799	14.8672	9.42329	10.9585	14.5541	0.1616	0.404	2.1412	0.1111	100
[4679]	Lesser Antilles Arc	LESSER ANTILLES / LESSER ANTILLES / GRENADA	MT. MAITLAND	12.117	-61.722	s_AMG6078 [4679]	474	30.0925	PICRITE [4679]				Quaternary					VOL					WR [4679]	46.3575	1.14176	12.62	9.4372	12.3371	14.6206	0.171769	1.11145	1.89957	0.303122	100
[3396][3325][2773]	Lesser Antilles Arc	LESSER ANTILLES / LESSER ANTILLES / GRENADA / MOUNT GRANBY	FEDON^S CAMP	12.093	-61.745	s_468 [3396]	52	26.8051	PICRITE [3396] / BASALT [3325] / BASALT, ALKALINE, OLIVINE [2773]	2000000 [2773]	5000000 [2773]		QUATERNARY				OLIVINE-MICROPHYRIC [3325]	VOL					WR [3396]	46.709	0.897315	13.4395	9.358	10.6847	16.1638	0.176222	0.441568	2.00529	0.124571	100
[6048]	Luzon Arc	LUZON ARC / LUZON ARC / LUZON / PINATUBO	MARAUNOT RIVER	15.168	120.322	s_P-22892-1A [6048]	693	31.7985	BASALT [6048]				QUATERNARY	7	6	1991		VOL					WR [6048]	52.4817	0.898245	15.038	7.86429	9.86051	8.72004	0.161482	1.5139	3.13881	0.322964	100			0.55	0		0.01
[6048]	Luzon Arc	LUZON ARC / LUZON ARC / LUZON / PINATUBO	MARAUNOT RIVER	15.1667	120.323	s_P-22892-2A [6048]	693	31.7985	BASALT [6048]				QUATERNARY	7	6	1991		VOL					WR [6048]	51.7925	0.918737	15.0431	8.13641	10.2172	8.77343	0.161536	1.53459	3.06919	0.35336	100			0.61	0		0
[6048]	Luzon Arc	LUZON ARC / LUZON ARC / LUZON / PINATUBO	MARAUNOT RIVER	15.168	120.322	s_CN6791-I [6048]	693	31.7985	BASALT [6048]				QUATERNARY	7	6	1991		VOL					WR [6048]	50.9627	0.908247	14.8347	8.41843	10.6467	9.29439	0.161466	1.35228	3.04767	0.37339	100			0.58	0.07		0.01
[3664]	Mexican Volcanic Belts	MEXICAN VOLCANIC BELTS / TRANS MEXICAN VOLCANIC BELT / MORELOS / CHICHINAUTZIN VOLCANIC FIELD	CONE NEAR METEPEC	19.25	-99.6	s_266 [3664]	2625	46.8487	ANDESITE [3664]				QUATERNARY [3664]					VOL					WR [3664]	56.7325	1.01854	15.5836	6.4066	6.57975	7.00754	0.112039	1.70096	4.58342	0.275005	100
[3850]	Mexican Volcanic Belts	MEXICAN VOLCANIC BELTS / TRANS MEXICAN VOLCANIC BELT / JALISCO / AMATLAN DE CANAS VOLCANIC FIELD	JALISCO BLOCK, TIO CLETO, ATENGUILLO GRABEN	20.6382	-104.504	s_269 [3850]	1205	35.7869	HAWAIITE [3850]				PLIO-QUATERNARY					VOL					WR [3850]	50.1628	1.96378	16.5853	10.2157	8.60806	7.02076	0.172975	1.12943	3.663	0.478225	100
[6862]	Mexican Volcanic Belts	MEXICAN VOLCANIC BELTS / TRANS MEXICAN VOLCANIC BELT / MORELOS / CHICHINAUTZIN VOLCANIC FIELD - GUESPALAPA		19.0886	-99.1814	s_A2-05 [6862]	3091	50.4789	BASALT [6862]				Holocene					VOL					WR [6862]	53.5584	1.46941	16.8832	7.53728	7.62692	7.02717	0.129948	1.2395	4.17832	0.349859	100
[3615]	Mexican Volcanic Belts	MEXICAN VOLCANIC BELTS / TRANS MEXICAN VOLCANIC BELT / MICHOACAN / ZITACUARO VOLCANIC COMPLEX	ZITACUARO CONES	19.4	-100.25	s_Z-129 [3615]	3082	50.4088	ANDESITE [3615]				PLEISTOCENE					VOL					WR [3615]	58.2758	0.817375	15.7925	5.1542	7.23528	7.03346	0.0908195	1.34211	4.06669	0.19173	100				0.17
[3664]	Mexican Volcanic Belts	MEXICAN VOLCANIC BELTS / TRANS MEXICAN VOLCANIC BELT / MORELOS / CHICHINAUTZIN VOLCANIC FIELD - TEPEZINGO	SHIELD VOLCANO	19.06	-99.44	s_290 [3664]	2842	48.5392	ANDESITE [3664]				QUATERNARY [3664]					VOL					WR [3664]	55.8619	0.878268	16.3399	6.39297	7.30188	7.03636	0.112337	1.33783	4.48325	0.25531	100
[19943]	Mexican Volcanic Belts	MEXICAN VOLCANIC BELTS / TRANS MEXICAN VOLCANIC BELT / MORELOS / CHICHINAUTZIN VOLCANIC FIELD - JUMENTO	VOLCAN JUMENTO	19.201	-99.3095	s_JU1402 [19943]	3633	54.7011	ANDESITE, BASALTIC [19943]				PLIO-QUATERNARY					VOL					WR [19943]	55.5982	0.980194	16.3298	6.7502	7.46766	7.04325	0.111156	1.36419	4.04204	0.313258	100
[14962]	Mexican Volcanic Belts	MEXICAN VOLCANIC BELTS / TRANS MEXICAN VOLCANIC BELT / JALISCO / MASCOTA VOLCANIC COMPLEX		20.42	-104.73	s_JAL-05-38 [14962]	1521	38.2486	ANDESITE, BASALTIC [14962]				QUATERNARY					VOL					WR [14962]	55.2135	1.00939	17.0586	5.72323	8.0751	7.06571	0.100939	1.61502	3.83567	0.302816	100
[22605]	Mexican Volcanic Belts	MEXICAN VOLCANIC BELTS / TRANS MEXICAN VOLCANIC BELT / MICHOACAN / MICHOACAN-GUANAJUATO VOLCANIC FIELD - PARICUTIN		19.493	-102.251	s_NMNH116291-2 [22605]	2553	46.2879	NOT GIVEN [22605]				Holocene					VOL					WR [22605]	53.978	0.911824	17.996	7.14429	7.91583	7.07415	0.130261	0.771543	3.86774	0.210421	100
[3664]	Mexican Volcanic Belts	MEXICAN VOLCANIC BELTS / TRANS MEXICAN VOLCANIC BELT / MORELOS / CHICHINAUTZIN VOLCANIC FIELD - CERRO LA MAGDALENA	CONE NEAR SAN ANDRES AHUAYUCAN	19.21	-99.11	s_145 [3664]	2457	45.54	BASALT, ALKALINE [3664]				QUATERNARY [3664]					VOL					WR [3664]	52.7328	1.73077	15.6883	9.06883	7.45951	7.09514	0.151822	1.31579	4.22065	0.536437	100
[10275]	Mexican Volcanic Belts	MEXICAN VOLCANIC BELTS / TRANS MEXICAN VOLCANIC BELT / MEXICO / AMEALCO CALDERA		18.8937	-99.6476	s_Z-703 [10275]	1914	41.3101	ANDESITE [10275]				QUATERNARY [10275]					VOL					WR [10275]	58.7136	0.854956	15.6477	6.05428	6.21334	7.10806	0.0894721	1.29237	3.83736	0.188886	100
[12110]	Mexican Volcanic Belts	MEXICAN VOLCANIC BELTS / TRANS MEXICAN VOLCANIC BELT / PUEBLA / ACOCULCO CALDERA	ACOCULCO CALDERA AREA	19.691	-98.0867	s_CHG12 [12110]	2960	49.4584	BASALT, SUBALKALINE [12110]				QUATERNARY [12110]					VOL					WR [12110]	50.1025	1.72043	17.3843	9.70243	8.96224	7.12178	0.15904	0.740185	3.78095	0.326082	100
[3618]	Mexican Volcanic Belts	MEXICAN VOLCANIC BELTS / TRANS MEXICAN VOLCANIC BELT / JALISCO / MASCOTA VOLCANIC COMPLEX		20.535	-104.785	s_MAS41 [3618]	1238	36.044	ANDESITE, BASALTIC [3618]				QUATERNARY [3618]					VOL					WR [3618]	55.0678	0.76567	17.5701	6.21547	7.80782	7.12275	0.120895	1.07798	3.98954	0.26194	100			0.28	0.11
[3664]	Mexican Volcanic Belts	MEXICAN VOLCANIC BELTS / TRANS MEXICAN VOLCANIC BELT / MORELOS / CHICHINAUTZIN VOLCANIC FIELD - JUMENTO	VOLCAN JUMENTO CONE	19.21	-99.31	s_249 [3664]	3718	55.3632	ANDESITE [3664]				QUATERNARY [3664]					VOL					WR [3664]	55.5778	1.00321	15.951	6.40048	7.25321	7.12279	0.110353	1.43459	4.79535	0.351124	100
[3664]	Mexican Volcanic Belts	MEXICAN VOLCANIC BELTS / TRANS MEXICAN VOLCANIC BELT / MORELOS / CHICHINAUTZIN VOLCANIC FIELD - CHICHINAUTZIN		19.09	-99.14	s_299 [3664]	3275	51.9122	BASALT, ALKALINE [3664]				QUATERNARY [3664]					VOL					WR [3664]	53.1829	1.8332	15.411	8.82353	6.79895	7.13135	0.151088	1.47059	4.40169	0.795729	100
[20033]	Mexican Volcanic Belts	MEXICAN VOLCANIC BELTS / TRANS MEXICAN VOLCANIC BELT / MORELOS / CHICHINAUTZIN VOLCANIC FIELD	JUCHIMILPA	18.7219	-99.7008	s_JU-02 [20033]	1612	38.9575	ANDESITE, BASALTIC [20033]				PLIO-QUATERNARY					VOL					WR [20033]	56.6596	0.855733	15.7455	6.01027	7.48012	7.13782	0.0906071	1.90275	3.79543	0.322158	100
[6862]	Mexican Volcanic Belts	MEXICAN VOLCANIC BELTS / TRANS MEXICAN VOLCANIC BELT / MORELOS / CHICHINAUTZIN VOLCANIC FIELD - HERRADURA		18.9497	-99.1878	s_C2-02 [6862]	1578	38.6926	NOT GIVEN [6862]				Holocene					VOL					WR [6862]	51.9024	1.64818	15.6627	8.74351	9.08015	7.13873	0.151673	1.35494	3.66037	0.657249	100
[3664]	Mexican Volcanic Belts	MEXICAN VOLCANIC BELTS / TRANS MEXICAN VOLCANIC BELT / MORELOS / CHICHINAUTZIN VOLCANIC FIELD	BREACHED CONE NEAR AHUATEPEC	18.98	-99.19	s_125 [3664]	1812	40.5155	BASALT, ALKALINE [3664]				QUATERNARY [3664]					VOL					WR [3664]	52.9341	1.5729	15.6282	8.2678	7.81408	7.16878	0.15124	1.41157	4.45654	0.594878	100
[19943]	Mexican Volcanic Belts	MEXICAN VOLCANIC BELTS / TRANS MEXICAN VOLCANIC BELT / MORELOS / CHICHINAUTZIN VOLCANIC FIELD - JUMENTO	VOLCAN JUMENTO	19.201	-99.3095	s_JU1404 [19943]	3633	54.7011	ANDESITE, BASALTIC [19943]				PLIO-QUATERNARY					VOL					WR [19943]	55.5354	1.07592	16.1388	6.76722	7.46104	7.16943	0.120664	1.40774	3.99196	0.331825	100
[19943]	Mexican Volcanic Belts	MEXICAN VOLCANIC BELTS / TRANS MEXICAN VOLCANIC BELT / MORELOS / CHICHINAUTZIN VOLCANIC FIELD - JUMENTO	VOLCAN JUMENTO	19.201	-99.3095	s_JU1403 [19943]	3633	54.7011	ANDESITE, BASALTIC [19943]				PLIO-QUATERNARY					VOL					WR [19943]	55.1235	1.08343	16.3426	6.8955	7.53341	7.18915	0.121507	1.37708	3.99959	0.334143	100
[23383]	Mexican Volcanic Belts	MEXICAN VOLCANIC BELTS / TRANS MEXICAN VOLCANIC BELT / MICHOACAN / MICHOACAN-GUANAJUATO VOLCANIC FIELD - EL ASTILLERO		19.3007	-102.367	s_TANC-1821 [23383]	1971	41.7541	ANDESITE, BASALTIC [23383]				HOLOCENE [23383]				PORPHYRITIC [23383]	VOL					WR [23383]	54.731	0.844646	17.4661	7.1091	7.89341	7.18954	0.120664	0.794369	3.68024	0.17094	100
[15388]	Mexican Volcanic Belts	MEXICAN VOLCANIC BELTS / TRANS MEXICAN VOLCANIC BELT / MORELOS / CERRO DEL AGUA	SIERRA CHICHINAUTZIN	19.0828	-98.9685	s_0511 [15388]	2982	49.6298	ANDESITE, BASALTIC [15388]	2500 [15388]	14000 [15388]		PLIO-QUATERNARY					VOL					WR [15388]	54.7252	1.37724	16.4945	7.21507	7.06328	7.19483	0.121432	1.36611	4.10844	0.333937	100
[14948]	Mexican Volcanic Belts	MEXICAN VOLCANIC BELTS / TRANS MEXICAN VOLCANIC BELT / MICHOACAN	TZITZIO GAP	19.876	-100.7	s_BHC-49 [14948]	2469	45.6335	NOT GIVEN [14948]				QUATERNARY [14948]					VOL					WR [14948]	49.7103	1.69796	16.1706	9.53855	9.69836	7.20136	0.139832	1.58809	3.67559	0.579305	100
[20034]	Mexican Volcanic Belts	MEXICAN VOLCANIC BELTS / TRANS MEXICAN VOLCANIC BELT / MORELOS / CHICHINAUTZIN VOLCANIC FIELD	VILLA METEPEC, WESTERN SIERRA CHICHINAUTZIN VOLCANIC FIELD	19.2492	-99.6031	s_D-50 [20034]	2625	46.8487	ANDESITE, BASALTIC [20034]				QUATERNARY					VOL					WR [20034]	56.8389	1.0233	15.9068	6.51469	6.8693	7.21378	0.111449	1.4691	3.79939	0.253293	100
[14948]	Mexican Volcanic Belts	MEXICAN VOLCANIC BELTS / TRANS MEXICAN VOLCANIC BELT / MICHOACAN	TZITZIO GAP	19.14	-102.46	s_BH-05 [14948]	298	28.7214	NOT GIVEN [14948]				QUATERNARY [14948]					VOL					WR [14948]	52.9453	1.15601	17.2095	8.30318	7.91114	7.24769	0.13068	0.944914	3.83997	0.31162	100
[3664]	Mexican Volcanic Belts	MEXICAN VOLCANIC BELTS / TRANS MEXICAN VOLCANIC BELT / MORELOS / CHICHINAUTZIN VOLCANIC FIELD	CONE NEAR IXCATEPEC	18.97	-99.07	s_128 [3664]	1589	38.7783	ANDESITE, BASALTIC [3664]				QUATERNARY [3664]					VOL					WR [3664]	54.889	1.39972	15.3969	7.39852	7.02859	7.24855	0.139972	1.42971	4.55909	0.509898	100
[14962]	Mexican Volcanic Belts	MEXICAN VOLCANIC BELTS / TRANS MEXICAN VOLCANIC BELT / JALISCO / AMATLAN DE CANAS VOLCANIC FIELD	TIO CLETO CONE	20.64	-104.5	s_JAL-05-16 [14962]	1205	35.7869	BASALT [14962]				QUATERNARY [14962]					VOL					WR [14962]	50.4253	1.94732	16.706	9.96208	8.50671	7.27683	0.153736	1.1274	3.38219	0.512453	100
[3664]	Mexican Volcanic Belts	MEXICAN VOLCANIC BELTS / TRANS MEXICAN VOLCANIC BELT / MORELOS / CHICHINAUTZIN VOLCANIC FIELD - LA TINAJA	VOLCAN LA TINAJA CONE	18.85	-99.22	s_272 [3664]	1277	36.3478	ANDESITE [3664]				QUATERNARY [3664]					VOL					WR [3664]	56.8136	0.85928	15.467	5.833	7.24828	7.27861	0.101092	2.10271	3.94258	0.353821	100
[3621]	Mexican Volcanic Belts	MEXICAN VOLCANIC BELTS / TRANS MEXICAN VOLCANIC BELT / MICHOACAN / MICHOACAN-GUANAJUATO VOLCANIC FIELD - JORULLO		18.97	-101.71	s_15LATE [3621]	1015	34.3068	NOT GIVEN [3621]				QUATERNARY					VOL					WR [3621]	53.8919	0.991322	17.5134	7.0961	8.14086	7.27971	0.12016	0.911215	3.84513	0.21028	100
[3664]	Mexican Volcanic Belts	MEXICAN VOLCANIC BELTS / TRANS MEXICAN VOLCANIC BELT / MORELOS / CHICHINAUTZIN VOLCANIC FIELD	CERRO CRUZ DE MORILLOS	19.19	-99.29	s_240 [3664]	3376	52.699	ANDESITE [3664]				QUATERNARY [3664]					VOL					WR [3664]	57.9403	0.76582	15.5179	6.11649	6.63039	7.28537	0.120919	1.35026	4.09109	0.181378	100
[3868]	Mexican Volcanic Belts	MEXICAN VOLCANIC BELTS / TRANS MEXICAN VOLCANIC BELT / JALISCO / LOS VOLCANES	JALISCO BLOCK, ATENGUILLO GRABEN	20.333	-104.499	s_114 [3868]	1546	38.4433	TRACHYANDESITE [3868]				PLIO-QUATERNARY					VOL					WR [3868]	56.0081	0.855397	15.6823	5.35642	6.89409	7.29124	0.0916497	2.93279	4.5112	0.376782	100
[3664]	Mexican Volcanic Belts	MEXICAN VOLCANIC BELTS / TRANS MEXICAN VOLCANIC BELT / MORELOS / CHICHINAUTZIN VOLCANIC FIELD - YOLOLICA		19.22	-99.18	s_242 [3664]	2885	48.8741	BASALT, ALKALINE [3664]				QUATERNARY [3664]					VOL					WR [3664]	52.1265	1.71735	16.1632	8.60693	7.68765	7.29367	0.15153	1.33347	4.35398	0.565714	100
[13031]	Mexican Volcanic Belts	MEXICAN VOLCANIC BELTS / TRANS MEXICAN VOLCANIC BELT / JALISCO / MASCOTA VOLCANIC COMPLEX	LA ESPERANZA	20.6021	-104.852	s_MAS02-3A [13031]	1338	36.823	ANDESITE, BASALTIC, CALC-ALKALINE [13031]				QUATERNARY					VOL					WR [13031]	53.1604	0.848627	17.6595	6.89345	8.9409	7.29415	0.121232	1.03048	3.78852	0.26267	100
[15443]	Mexican Volcanic Belts	MEXICAN VOLCANIC BELTS / TRANS MEXICAN VOLCANIC BELT / MORELOS / CHICHINAUTZIN VOLCANIC FIELD - ZEMPOALA	SIERRA DE LAS CRUCES	18.5256	-99.1961	s_ZEMPV [15443]	874	33.2085	BASALT [15443]				PLEISTOCENE [15443]					VOL					WR [15443]	51.7807	1.94253	16.4002	8.6807	7.76002	7.30473	0.131526	1.35573	4.03683	0.607042	100
[14948]	Mexican Volcanic Belts	MEXICAN VOLCANIC BELTS / TRANS MEXICAN VOLCANIC BELT / MICHOACAN	TZITZIO GAP	19.11	-102.34	s_BH-01 [14948]	504	30.3262	NOT GIVEN [14948]				QUATERNARY [14948]					VOL					WR [14948]	54.3868	0.902437	17.0861	7.64063	7.55039	7.30974	0.110298	0.952572	3.82031	0.24065	100
[19943]	Mexican Volcanic Belts	MEXICAN VOLCANIC BELTS / TRANS MEXICAN VOLCANIC BELT / MORELOS / CHICHINAUTZIN VOLCANIC FIELD - JUMENTO	VOLCAN JUMENTO	19.201	-99.3095	s_JU 1401 [19943]	3633	54.7011	ANDESITE, BASALTIC [19943]				PLIO-QUATERNARY					VOL					WR [19943]	54.7963	1.05906	16.1405	6.80244	7.85132	7.31161	0.1222	1.50713	4.0224	0.386965	100
[10275]	Mexican Volcanic Belts	MEXICAN VOLCANIC BELTS / TRANS MEXICAN VOLCANIC BELT / MEXICO / AMEALCO CALDERA		19.7755	-100.302	s_Z-724 [10275]	2511	45.9607	ANDESITE [10275]				QUATERNARY [10275]					VOL					WR [10275]	57.7271	0.816002	15.7727	6.4086	6.94596	7.34401	0.0995124	1.40312	3.29386	0.189074	100
[6909][10275]	Mexican Volcanic Belts	MEXICAN VOLCANIC BELTS / TRANS MEXICAN VOLCANIC BELT / MEXICO / AMEALCO CALDERA		19.0315	-100.156	s_Z-358 [6909]	1855	40.8504	ANDESITE, BASALTIC [6909]				QUATERNARY [6909]					VOL					WR [6909]	54.3802	0.789132	17.1012	6.99231	7.80142	7.3619	0.109879	1.41844	3.85576	0.189791	100
[19943]	Mexican Volcanic Belts	MEXICAN VOLCANIC BELTS / TRANS MEXICAN VOLCANIC BELT / MORELOS / CHICHINAUTZIN VOLCANIC FIELD - JUMENTO	VOLCAN JUMENTO	19.201	-99.3095	s_JU1407 [19943]	3633	54.7011	ANDESITE, BASALTIC [19943]				PLIO-QUATERNARY					VOL					WR [19943]	55.1433	1.10608	16.008	6.85772	7.6722	7.37054	0.120664	1.39769	3.96179	0.361991	100
[15388]	Mexican Volcanic Belts	MEXICAN VOLCANIC BELTS / TRANS MEXICAN VOLCANIC BELT / MORELOS / CERRO DEL AGUA	SIERRA CHICHINAUTZIN	19.023	-98.9702	s_0524 [15388]	2208	43.6003	ANDESITE [15388]	2500 [15388]	14000 [15388]		PLIO-QUATERNARY					VOL					WR [15388]	57.3284	0.899764	15.8645	6.33167	7.00826	7.3718	0.106033	1.16131	3.7162	0.212066	100
[15065]	Mexican Volcanic Belts	MEXICAN VOLCANIC BELTS / TRANS MEXICAN VOLCANIC BELT / MEXICO / POPOCATEPETL	UNIT IIB, TETELA	18.88	-98.725	s_PO18 [15065]	2143	43.094	ANDESITE, BASALTIC [15065]				PLIO-QUATERNARY					VOL					WR [15065]	55.3493	1.51503	16.5644	7.46166	6.86816	7.37317	0.121203	1.21203	3.53508	0	100			0.43	0.12
[3664]	Mexican Volcanic Belts	MEXICAN VOLCANIC BELTS / TRANS MEXICAN VOLCANIC BELT / MORELOS / CHICHINAUTZIN VOLCANIC FIELD - EL TEZONTLE	VOLCAN EL TEZONTLE CONE	19.04	-99.46	s_141 [3664]	2669	47.1915	ANDESITE, BASALTIC [3664]				QUATERNARY [3664]					VOL					WR [3664]	54.8169	1.18634	16.3633	7.0362	7.05666	7.38392	0.122724	1.16588	4.56126	0.306811	100
[7520]	Mexican Volcanic Belts	MEXICAN VOLCANIC BELTS / TRANS MEXICAN VOLCANIC BELT / MEXICO / POPOCATEPETL	VOLCAN ATLACORRA, 28.4 KM NW FROM POPOCATEPETL CRATER	19.1089	-98.8908	s_96331A [7520]	2534	46.1399	NOT GIVEN [7520]				PLIO-QUATERNARY					VOL					WR [7520]	55.3678	1.03208	16.8572	7.01204	7.10311	7.38642	0.121421	1.08267	3.83487	0.202368	100
[20283]	Mexican Volcanic Belts	MEXICAN VOLCANIC BELTS / TRANS MEXICAN VOLCANIC BELT / MICHOACAN / MICHOACAN-GUANAJUATO VOLCANIC FIELD - JORULLO	1759 TO 1774 ERUPTION	18.9672	-101.718	s_JOR-0603F [20283]	1015	34.3068	ANDESITE, BASALTIC [20283]				Holocene					VOL					WR [20283]	53.6476	0.970679	17.3822	7.35515	8.33584	7.40518	0.130091	0.860602	3.7126	0.20014	100
[4698]	Mexican Volcanic Belts	MEXICAN VOLCANIC BELTS / TRANS MEXICAN VOLCANIC BELT / JALISCO / AYUTLA		20.2282	-104.217	s_AY-505 [4698]	1499	38.0772	TRACHYANDESITE, BASALTIC [4698]				PLIO-QUATERNARY					VOL					WR [4698]	53.9799	1.00859	15.7643	6.47517	7.75608	7.41316	0.108928	3.00561	3.98394	0.504297	100
[3868]	Mexican Volcanic Belts	MEXICAN VOLCANIC BELTS / TRANS MEXICAN VOLCANIC BELT / JALISCO / LOS VOLCANES	JALISCO BLOCK, ATENGUILLO GRABEN	20.333	-104.499	s_112 [3868]	1546	38.4433	TRACHYANDESITE [3868]				PLIO-QUATERNARY					VOL					WR [3868]	56.0634	0.660167	16.4534	5.49462	7.06886	7.41418	0.101564	2.01097	4.49929	0.233597	100
[20033]	Mexican Volcanic Belts	MEXICAN VOLCANIC BELTS / TRANS MEXICAN VOLCANIC BELT / MORELOS / CHICHINAUTZIN VOLCANIC FIELD	TENANCINGO	18.9369	-99.5908	s_SCH-03 [20033]	2105	42.7979	ANDESITE, BASALTIC [20033]				PLIO-QUATERNARY					VOL					WR [20033]	55.0887	0.886739	16.6264	6.89238	7.26522	7.42644	0.110842	1.58202	3.8291	0.292221	100
[6862]	Mexican Volcanic Belts	MEXICAN VOLCANIC BELTS / TRANS MEXICAN VOLCANIC BELT / MORELOS / CHICHINAUTZIN VOLCANIC FIELD - LA CIMA		19.1153	-99.1956	s_A2-11 [6862]	3042	50.0972	NOT GIVEN [6862]				Holocene					VOL					WR [6862]	53.7889	1.25816	16.7486	7.5805	7.51877	7.46845	0.130849	1.11725	4.13683	0.251632	100
[15065]	Mexican Volcanic Belts	MEXICAN VOLCANIC BELTS / TRANS MEXICAN VOLCANIC BELT / MEXICO / POPOCATEPETL	UNIT IIB, TETELA CONE, SW SIDE	18.89	-98.7175	s_PO19 [15065]	2157	43.203	ANDESITE, BASALTIC [15065]				PLIO-QUATERNARY					VOL					WR [15065]	53.9959	1.56437	17.1576	7.63164	7.16581	7.4686	0.121112	1.1102	3.78476	0	100			0	0
[7520]	Mexican Volcanic Belts	MEXICAN VOLCANIC BELTS / TRANS MEXICAN VOLCANIC BELT / MEXICO / POPOCATEPETL	CERRO TECAJETE (PUEBLA VALLEY), 22.7 KM NE FROM POPOCATEPETL CRATER	19.0672	-98.4008	s_95103 [7520]	2293	44.2625	NOT GIVEN [7520]				PLIO-QUATERNARY					VOL					WR [7520]	54.6531	1.24485	16.4843	7.19807	7.29846	7.46913	0.12047	1.35529	3.88515	0.291135	100
[20033]	Mexican Volcanic Belts	MEXICAN VOLCANIC BELTS / TRANS MEXICAN VOLCANIC BELT / MORELOS / CHICHINAUTZIN VOLCANIC FIELD	ATLACHOLOAYA	18.7008	-99.1906	s_AT-13 [20033]	985	34.0731	ANDESITE, BASALTIC [20033]				PLIO-QUATERNARY					VOL					WR [20033]	55.701	0.966962	16.106	6.39605	8.03787	7.47381	0.100725	1.28928	3.65633	0.271958	100
[22605]	Mexican Volcanic Belts	MEXICAN VOLCANIC BELTS / TRANS MEXICAN VOLCANIC BELT / MICHOACAN / MICHOACAN-GUANAJUATO VOLCANIC FIELD - PARICUTIN		19.4871	-102.262	s_PAR-1536AA [22605]	2629	46.8799	NOT GIVEN [22605]				Holocene					VOL					WR [22605]	53.575	0.906344	17.9456	7.40181	7.80463	7.48238	0.130916	0.765358	3.77644	0.21148	100
[6862]	Mexican Volcanic Belts	MEXICAN VOLCANIC BELTS / TRANS MEXICAN VOLCANIC BELT / MEXICO / CHICHINAUTZIN VOLCANIC FIELD - XITLE	XITLE SCORIA CONE	19.3272	-99.175	s_UNAM-IG [6862]	2282	44.1768	NOT GIVEN [6862]				Holocene					VOL					WR [6862]	53.727	1.53477	16.1301	8.02416	7.41304	7.49329	0.140436	1.20374	3.862	0.471465	100
[14962]	Mexican Volcanic Belts	MEXICAN VOLCANIC BELTS / TRANS MEXICAN VOLCANIC BELT / JALISCO / MASCOTA VOLCANIC COMPLEX		20.6	-104.86	s_JAL-05-35 [14962]	1256	36.1842	ANDESITE, BASALTIC [14962]				QUATERNARY					VOL					WR [14962]	53.9116	0.810701	17.1261	6.65788	8.51236	7.49899	0.111471	1.01338	4.05351	0.304013	100
[3868]	Mexican Volcanic Belts	MEXICAN VOLCANIC BELTS / TRANS MEXICAN VOLCANIC BELT / JALISCO / LOS VOLCANES	JALISCO BLOCK, ATENGUILLO GRABEN	20.277	-104.581	s_125 [3868]	1687	39.5417	TRACHYANDESITE [3868]		2.54 [3868]		PLIO-QUATERNARY					VOL					WR [3868]	55.9448	0.720885	16.2453	5.30003	7.02609	7.5033	0.101533	2.39618	4.50807	0.253833	100
[3621]	Mexican Volcanic Belts	MEXICAN VOLCANIC BELTS / TRANS MEXICAN VOLCANIC BELT / MICHOACAN / MICHOACAN-GUANAJUATO VOLCANIC FIELD - JORULLO		18.97	-101.71	s_16LATE [3621]	1015	34.3068	NOT GIVEN [3621]				QUATERNARY					VOL					WR [3621]	53.6608	0.997263	17.3564	7.2545	8.13928	7.50466	0.12088	0.906603	3.8581	0.201467	100
[15065]	Mexican Volcanic Belts	MEXICAN VOLCANIC BELTS / TRANS MEXICAN VOLCANIC BELT / MEXICO / POPOCATEPETL	NEPANTLA, UNIT I	18.975	-98.87	s_PO1 [15065]	2006	42.0267	ANDESITE, BASALTIC [15065]				PLIO-QUATERNARY					VOL					WR [15065]	53.4897	1.72547	16.2398	8.14386	7.35864	7.51089	0.152248	1.52248	3.85694	0	100			0	0.35
[9998]	Mexican Volcanic Belts	MEXICAN VOLCANIC BELTS / TRANS MEXICAN VOLCANIC BELT / MEXICO / ZITACUARO VOLCANIC FIELD - VALLE DE BRAVO	TEMASCALTEPEC	19.05	-100.06	s_ZIT-99-8 [9998]	1937	41.4892	NOT GIVEN [9998]				PLIO-QUATERNARY					VOL					WR [9998]	54.4888	0.904795	15.9847	6.69549	7.84156	7.53996	0.110586	2.41279	3.61918	0.402131	100
[22605]	Mexican Volcanic Belts	MEXICAN VOLCANIC BELTS / TRANS MEXICAN VOLCANIC BELT / MICHOACAN / MICHOACAN-GUANAJUATO VOLCANIC FIELD - PARICUTIN		19.4856	-102.26	s_PAR-1537 [22605]	2629	46.8799	NOT GIVEN [22605]				Holocene					VOL					WR [22605]	53.5043	0.898808	17.8752	7.52373	7.7964	7.54393	0.131287	0.767522	3.75682	0.201979	100
[22605]	Mexican Volcanic Belts	MEXICAN VOLCANIC BELTS / TRANS MEXICAN VOLCANIC BELT / MICHOACAN / MICHOACAN-GUANAJUATO VOLCANIC FIELD - PARICUTIN		19.4871	-102.262	s_PAR-1536B [22605]	2629	46.8799	NOT GIVEN [22605]				Holocene					VOL					WR [22605]	53.4994	0.897539	17.8903	7.47277	7.81565	7.57362	0.131101	0.766438	3.75151	0.201694	100
[20283]	Mexican Volcanic Belts	MEXICAN VOLCANIC BELTS / TRANS MEXICAN VOLCANIC BELT / MICHOACAN / MICHOACAN-GUANAJUATO VOLCANIC FIELD - JORULLO	1759 TO 1774 ERUPTION	18.9786	-101.737	s_JOR-0763 [20283]	793	32.5775	ANDESITE, BASALTIC [20283]				Holocene					VOL					WR [20283]	53.57	0.975463	17.2265	7.43162	8.21601	7.61263	0.130732	0.895012	3.74095	0.201126	100
[20283]	Mexican Volcanic Belts	MEXICAN VOLCANIC BELTS / TRANS MEXICAN VOLCANIC BELT / MICHOACAN / MICHOACAN-GUANAJUATO VOLCANIC FIELD - JORULLO	1759 TO 1774 ERUPTION	18.9672	-101.718	s_JOR-0603E [20283]	1015	34.3068	ANDESITE, BASALTIC [20283]				Holocene					VOL					WR [20283]	53.6133	0.95219	17.2397	7.40704	8.28906	7.62754	0.1303	0.85196	3.69851	0.190438	100
[3850]	Mexican Volcanic Belts	MEXICAN VOLCANIC BELTS / TRANS MEXICAN VOLCANIC BELT / JALISCO / AMATLAN DE CANAS VOLCANIC FIELD	JALISCO BLOCK, TIO CLETO, ATENGUILLO GRABEN	20.6382	-104.504	s_248 [3850]	1205	35.7869	HAWAIITE [3850]				PLIO-QUATERNARY					VOL					WR [3850]	50.1069	1.92484	16.1931	10.2251	8.21876	7.63825	0.162949	1.11009	3.97189	0.448111	100
[3664]	Mexican Volcanic Belts	MEXICAN VOLCANIC BELTS / TRANS MEXICAN VOLCANIC BELT / MORELOS / CHICHINAUTZIN VOLCANIC FIELD - CERRO LA MAGDALENA	PARTIALLY BURIED CONE NEAR SANTIAGO TEPETLAPA	18.95	-99.08	s_132 [3664]	1378	37.1346	BASALT, ALKALINE [3664]				QUATERNARY [3664]					VOL					WR [3664]	53.2695	1.48706	15.4818	7.93441	7.62884	7.63903	0.142595	1.3241	4.62416	0.468527	100
[20033]	Mexican Volcanic Belts	MEXICAN VOLCANIC BELTS / TRANS MEXICAN VOLCANIC BELT / MORELOS / CHICHINAUTZIN VOLCANIC FIELD	ATLACHOLOAYA	18.6903	-99.21	s_AT-11 [20033]	984	34.0654	ANDESITE, BASALTIC [20033]				PLIO-QUATERNARY					VOL					WR [20033]	54.9466	0.987306	16.2301	6.69958	8.18054	7.64658	0.11082	1.20895	3.69736	0.292162	100
[3664]	Mexican Volcanic Belts	MEXICAN VOLCANIC BELTS / TRANS MEXICAN VOLCANIC BELT / MORELOS / CHICHINAUTZIN VOLCANIC FIELD - CAJETE	VOLCAN CAJETE CONE	19.1	-99.25	s_203 [3664]	3043	50.105	ANDESITE, BASALTIC [3664]				QUATERNARY [3664]					VOL					WR [3664]	55.2986	1.14619	15.8858	6.91735	6.92741	7.66137	0.130706	1.26684	4.47416	0.291575	100
[6862]	Mexican Volcanic Belts	MEXICAN VOLCANIC BELTS / TRANS MEXICAN VOLCANIC BELT / MORELOS / CHICHINAUTZIN VOLCANIC FIELD - YECAHUAZIN		19.0772	-99.1022	s_B3-07 [6862]	3060	50.2374	NOT GIVEN [6862]				Holocene					VOL					WR [6862]	53.1444	1.57226	16.1056	7.87164	7.71012	7.6698	0.131022	1.40092	3.96088	0.433379	100
[20033]	Mexican Volcanic Belts	MEXICAN VOLCANIC BELTS / TRANS MEXICAN VOLCANIC BELT / MORELOS / CHICHINAUTZIN VOLCANIC FIELD	PUEBLO VIEJO	18.5258	-99.1958	s_AT-3 [20033]	874	33.2085	TRACHYBASALT [20033]				PLIO-QUATERNARY					VOL					WR [20033]	51.8376	1.84774	16.1147	8.67326	7.80493	7.67367	0.141357	1.3227	3.98829	0.595719	100
[14950]	Mexican Volcanic Belts	MEXICAN VOLCANIC BELTS / TRANS MEXICAN VOLCANIC BELT / PUEBLA / PICO DE ORIZABA (=VOLCAN CITLALTEPETL)	ALJOJUCA	19.095	-97.5325	s_AL-1 [14950]	2456	45.5322	ANDESITE, BASALTIC [14950]		650000		PLIO-QUATERNARY					VOL					WR [14950]	54.5721	0.845511	15.5261	8.12914	8.5855	7.68282	0.130387	1.32895	2.98888	0.210626	100
[20033]	Mexican Volcanic Belts	MEXICAN VOLCANIC BELTS / TRANS MEXICAN VOLCANIC BELT / MORELOS / CHICHINAUTZIN VOLCANIC FIELD	ATLACHOLOAYA	18.7125	-99.2208	s_AT-4 [20033]	1105	35.0079	ANDESITE, BASALTIC [20033]				PLIO-QUATERNARY					VOL					WR [20033]	55.9718	0.926485	15.6294	6.36455	8.14703	7.68379	0.100705	1.32931	3.57503	0.271903	100
[20283]	Mexican Volcanic Belts	MEXICAN VOLCANIC BELTS / TRANS MEXICAN VOLCANIC BELT / MICHOACAN / MICHOACAN-GUANAJUATO VOLCANIC FIELD - JORULLO	1759 TO 1774 ERUPTION	18.997	-101.74	s_JOR-0722 [20283]	733	32.1101	ANDESITE, BASALTIC [20283]				Holocene					VOL					WR [20283]	53.4407	0.980196	17.2334	7.44149	8.32166	7.69154	0.130026	0.85017	3.71074	0.20004	100
[3621]	Mexican Volcanic Belts	MEXICAN VOLCANIC BELTS / TRANS MEXICAN VOLCANIC BELT / MICHOACAN / MICHOACAN-GUANAJUATO VOLCANIC FIELD - JORULLO		19.48	-102.25	s_JOR1A [3621]	2597	46.6306	BASALT [3621]				QUATERNARY					VOL					WR [3621]	53.7145	1.00551	17.1541	7.30172	8.04411	7.69218	0.140772	0.945183	3.80084	0.201103	100			0.25	0.1
[14962]	Mexican Volcanic Belts	MEXICAN VOLCANIC BELTS / TRANS MEXICAN VOLCANIC BELT / JALISCO / MASCOTA VOLCANIC COMPLEX		20.58	-104.87	s_JAL-05-34 [14962]	1256	36.1842	ANDESITE, BASALTIC [14962]				QUATERNARY					VOL					WR [14962]	54.6601	0.700771	17.4192	6.57723	8.00881	7.70848	0.120132	0.800881	3.80418	0.20022	100
[6862]	Mexican Volcanic Belts	MEXICAN VOLCANIC BELTS / TRANS MEXICAN VOLCANIC BELT / MORELOS / CHICHINAUTZIN VOLCANIC FIELD - GUESPALAPA		19.0297	-99.1933	s_B2-01 [6862]	2643	46.989	BASALT [6862]				Holocene					VOL					WR [6862]	51.0139	1.80679	16.6345	9.14595	7.93371	7.71164	0.141313	1.08003	4.01732	0.514782	100
[15388]	Mexican Volcanic Belts	MEXICAN VOLCANIC BELTS / TRANS MEXICAN VOLCANIC BELT / MORELOS / CERRO DEL AGUA	SIERRA CHICHINAUTZIN	19.078	-98.9827	s_0512 [15388]	3161	51.0242	ANDESITE [15388]	2500 [15388]	14000 [15388]		PLIO-QUATERNARY					VOL					WR [15388]	57.5281	0.955914	15.9183	5.37065	7.24579	7.73495	0.110063	1.03948	3.91334	0.183438	100
[15388]	Mexican Volcanic Belts	MEXICAN VOLCANIC BELTS / TRANS MEXICAN VOLCANIC BELT / MORELOS / CERRO DEL AGUA	SIERRA CHICHINAUTZIN	19.0538	-98.9604	s_0522 [15388]	2640	46.9656	ANDESITE [15388]	2500 [15388]	14000 [15388]		PLIO-QUATERNARY					VOL					WR [15388]	57.1379	0.886465	15.668	6.33625	7.0572	7.75784	0.109666	1.18805	3.65553	0.203085	100
[20283]	Mexican Volcanic Belts	MEXICAN VOLCANIC BELTS / TRANS MEXICAN VOLCANIC BELT / MICHOACAN / MICHOACAN-GUANAJUATO VOLCANIC FIELD - JORULLO	1759 TO 1774 ERUPTION	18.9786	-101.707	s_JOR-0733 [20283]	1092	34.9067	ANDESITE, BASALTIC [20283]				Holocene					VOL					WR [20283]	53.7412	0.952859	17.1113	7.44233	8.01404	7.77332	0.130391	0.882648	3.74122	0.210632	100
[14962]	Mexican Volcanic Belts	MEXICAN VOLCANIC BELTS / TRANS MEXICAN VOLCANIC BELT / JALISCO / MASCOTA VOLCANIC COMPLEX		20.55	-104.92	s_JAL-05-30 [14962]	1263	36.2388	ANDESITE, BASALTIC [14962]				QUATERNARY					VOL					WR [14962]	53.9666	0.808489	17.3825	7.00354	8.08489	7.78171	0.121273	0.90955	3.73926	0.202122	100
[3618]	Mexican Volcanic Belts	MEXICAN VOLCANIC BELTS / TRANS MEXICAN VOLCANIC BELT / JALISCO / MASCOTA VOLCANIC COMPLEX		20.535	-104.785	s_MAS45 [3618]	1238	36.044	ANDESITE, BASALTIC [3618]				QUATERNARY [3618]					VOL					WR [3618]	53.1028	0.905848	17.3822	6.8386	8.59549	7.82049	0.12078	0.865588	4.19709	0.171105	100			0.29	0.02
[23383]	Mexican Volcanic Belts	MEXICAN VOLCANIC BELTS / TRANS MEXICAN VOLCANIC BELT / MICHOACAN / MICHOACAN-GUANAJUATO VOLCANIC FIELD - EL ASTILLERO		19.293	-102.373	s_TANC-1804 [23383]	1971	41.7541	ANDESITE, BASALTIC [23383]				HOLOCENE [23383]				PORPHYRITIC [23383]	VOL					WR [23383]	54.2144	0.834842	17.2702	7.31241	7.95615	7.82539	0.1207	0.734259	3.56065	0.170992	100
[20033]	Mexican Volcanic Belts	MEXICAN VOLCANIC BELTS / TRANS MEXICAN VOLCANIC BELT / MORELOS / CHICHINAUTZIN VOLCANIC FIELD	ATLACHOLOAYA	18.6892	-99.2336	s_AT-7 [20033]	986	34.0809	TRACHYBASALT [20033]				PLIO-QUATERNARY					VOL					WR [20033]	51.0453	1.9897	15.6853	8.89809	8.36279	7.83759	0.1515	1.3736	3.9087	0.747399	100
[20034]	Mexican Volcanic Belts	MEXICAN VOLCANIC BELTS / TRANS MEXICAN VOLCANIC BELT / MORELOS / CHICHINAUTZIN VOLCANIC FIELD	CUATE EL GRANDE, WESTERN SIERRA CHICHINAUTZIN VOLCANIC FIELD	19.1897	-99.4389	s_MX39.2 [20034]	2740	47.7446	BASALT [20034]				QUATERNARY					VOL					WR [20034]	50.9019	1.48464	15.8564	9.6188	8.90784	7.84738	0.161593	1.33315	3.60555	0.282788	100
[14948]	Mexican Volcanic Belts	MEXICAN VOLCANIC BELTS / TRANS MEXICAN VOLCANIC BELT / MICHOACAN	TZITZIO GAP	18.94	-101.83	s_BH-14 [14948]	637	31.3622	NOT GIVEN [14948]				QUATERNARY [14948]					VOL					WR [14948]	50.5423	1.26531	15.8666	10.002	8.79695	7.85298	0.130548	1.39586	3.69552	0.451898	100
[6862]	Mexican Volcanic Belts	MEXICAN VOLCANIC BELTS / TRANS MEXICAN VOLCANIC BELT / MORELOS / CHICHINAUTZIN VOLCANIC FIELD - CHICHINAUTZIN		19.0864	-99.1822	s_A2-05-IIA [6862]	3091	50.4789	BASALT [6862]				Holocene					VOL					WR [6862]	53.0266	1.71581	16.2287	8.52811	7.39431	7.8539	0.146048	1.20515	3.69715	0.204263	100
[20033]	Mexican Volcanic Belts	MEXICAN VOLCANIC BELTS / TRANS MEXICAN VOLCANIC BELT / MORELOS / CHICHINAUTZIN VOLCANIC FIELD	JUCHIMILPA	18.7125	-99.7092	s_JU-01 [20033]	1744	39.9858	ANDESITE, BASALTIC [20033]				PLIO-QUATERNARY					VOL					WR [20033]	56.3808	0.815217	16.1131	5.82729	7.1558	7.86031	0.120773	1.67069	3.79428	0.261675	100
[10275]	Mexican Volcanic Belts	MEXICAN VOLCANIC BELTS / TRANS MEXICAN VOLCANIC BELT / MEXICO / AMEALCO CALDERA		19.9331	-100.167	s_Z-736 [10275]	2385	44.9791	BASALT [10275]				QUATERNARY [10275]					VOL					WR [10275]	50.9293	1.5406	15.9129	9.29331	9.08458	7.86204	0.139151	1.29212	3.46884	0.47709	100
[10275]	Mexican Volcanic Belts	MEXICAN VOLCANIC BELTS / TRANS MEXICAN VOLCANIC BELT / MEXICO / AMEALCO CALDERA		19.0553	-100.051	s_Z-523 [10275]	1796	40.3908	ANDESITE, BASALTIC [10275]				QUATERNARY [10275]					VOL					WR [10275]	53.9862	0.890267	15.4746	7.10213	8.05242	7.88236	0.110033	2.24067	3.82115	0.440132	100
[3618][11188][11205]	Mexican Volcanic Belts	MEXICAN VOLCANIC BELTS / TRANS MEXICAN VOLCANIC BELT / JALISCO / MASCOTA VOLCANIC COMPLEX		20.7337	-104.889	s_MAS127 [3618] / s_MAS 127 [11188]	1336	36.8074	ANDESITE, BASALTIC [3618]				QUATERNARY [3618]					VOL					WR [3618]	56.6244	0.652378	16.758	6.31236	6.6563	7.91009	0.122321	0.937794	3.90408	0.122321	100			0.84	0.13
[7520]	Mexican Volcanic Belts	MEXICAN VOLCANIC BELTS / TRANS MEXICAN VOLCANIC BELT / MEXICO / POPOCATEPETL	CERRO MIRADOR, 26.4 KM W FROM POPOCATEPETL CRATER	18.9806	-98.8861	s_96353 [7520]	1969	41.7385	NOT GIVEN [7520]				PLIO-QUATERNARY					VOL					WR [7520]	54.6407	1.28993	16.2552	7.3768	7.13494	7.91091	0.120931	1.11861	3.8698	0.282173	100
[3664]	Mexican Volcanic Belts	MEXICAN VOLCANIC BELTS / TRANS MEXICAN VOLCANIC BELT / MORELOS / CHICHINAUTZIN VOLCANIC FIELD	BREACHED CONE NEAR LA CIMA	19.11	-99.19	s_102 [3664]	3034	50.0349	BASALT, ALKALINE [3664]				QUATERNARY [3664]					VOL					WR [3664]	51.7173	1.57832	16.5773	8.41771	7.68314	7.98094	0.138972	1.1217	4.44709	0.337502	100
[3664]	Mexican Volcanic Belts	MEXICAN VOLCANIC BELTS / TRANS MEXICAN VOLCANIC BELT / MORELOS / CHICHINAUTZIN VOLCANIC FIELD - GORDO	VOLCAN GORDO CONE	18.85	-100.13	s_273 [3664]	1329	36.7529	ANDESITE, BASALTIC [3664]				QUATERNARY [3664]					VOL					WR [3664]	54.7862	0.869302	16.072	6.71182	7.50025	7.99555	0.121298	1.54655	4.13424	0.262812	100
[7520]	Mexican Volcanic Belts	MEXICAN VOLCANIC BELTS / TRANS MEXICAN VOLCANIC BELT / MEXICO / POPOCATEPETL	CERRO SANTA BARBARA, 30.5 KM W FROM POPOCATEPETL CRATER	18.9825	-98.9245	s_96356B [7520]	1903	41.2244	BASALT, ALKALINE [7520]				PLIO-QUATERNARY					VOL					WR [7520]	51.7683	1.66247	16.131	8.54408	8.15113	8	0.141058	1.24937	3.88917	0.463476	100
[20034]	Mexican Volcanic Belts	MEXICAN VOLCANIC BELTS / TRANS MEXICAN VOLCANIC BELT / MORELOS / CHICHINAUTZIN VOLCANIC FIELD	CUATE EL COLERO, WESTERN SIERRA CHICHINAUTZIN VOLCANIC FIELD	19.1964	-99.4392	s_MX40 [20034]	2732	47.6823	BASALT [20034]				QUATERNARY					VOL					WR [20034]	50.4986	1.53823	16.0907	9.32513	9.23953	8.00489	0.161919	1.265	3.61283	0.263119	100
[3664]	Mexican Volcanic Belts	MEXICAN VOLCANIC BELTS / TRANS MEXICAN VOLCANIC BELT / MORELOS / CHICHINAUTZIN VOLCANIC FIELD - TESOYO	VOLCAN TESOYO CONE	19.095	-99.22	s_202 [3664]	3035	50.0426	ANDESITE, BASALTIC [3664]				QUATERNARY [3664]					VOL					WR [3664]	54.7657	0.961153	16.1193	6.98839	7.29876	8.00961	0.130156	1.0813	4.42531	0.220264	100
[14948]	Mexican Volcanic Belts	MEXICAN VOLCANIC BELTS / TRANS MEXICAN VOLCANIC BELT / MICHOACAN	TZITZIO GAP	19.07	-102.42	s_BH-09 [14948]	276	28.55	NOT GIVEN [14948]				QUATERNARY [14948]					VOL					WR [14948]	49.1131	1.55211	16.6196	10.3205	9.5646	8.0125	0.151179	0.816368	3.46704	0.382987	100
[20034]	Mexican Volcanic Belts	MEXICAN VOLCANIC BELTS / TRANS MEXICAN VOLCANIC BELT / MORELOS / CHICHINAUTZIN VOLCANIC FIELD	CUATE MEDIANO, WESTERN SIERRA CHICHINAUTZIN VOLCANIC FIELD	19.195	-99.4444	s_MX38 [20034]	2694	47.3863	ANDESITE, BASALTIC [20034]				QUATERNARY					VOL					WR [20034]	53.4434	1.27054	16.1338	7.664	8.0165	8.02659	0.131087	1.38146	3.66037	0.272259	100
[23880]	Mexican Volcanic Belts	MEXICAN VOLCANIC BELTS / TRANS MEXICAN VOLCANIC BELT / MICHOACAN / MICHOACAN-GUANAJUATO VOLCANIC FIELD - CERRITOS		19.7	-101.2	s_TQ15 [23880]	1901	41.2088	BASALT [23880]				PLEISTOCENE [23880]					VOL					WR [23880]	49.4929	1.29151	17.5283	10.0318	9.67389	8.03341	0.170014	0.42752	3.18155	0.16902	100
[10275]	Mexican Volcanic Belts	MEXICAN VOLCANIC BELTS / TRANS MEXICAN VOLCANIC BELT / MEXICO / AMEALCO CALDERA		18.9266	-99.9394	s_Z-718 [10275]	2436	45.3764	ANDESITE, BASALTIC [10275]				QUATERNARY [10275]					VOL					WR [10275]	52.9114	1.01351	15.8983	7.74046	7.57154	8.04849	0.1093	1.87798	4.24285	0.586248	100
[15008]	Mexican Volcanic Belts	MEXICAN VOLCANIC BELTS / TRANS MEXICAN VOLCANIC BELT / MICHOACAN / MICHOACAN-GUANAJUATO VOLCANIC FIELD		19.5887	-102.129	s_H-736 [15008]	2366	44.8311	ANDESITE, BASALTIC [15008]				PLIO-QUATERNARY					VOL					WR [15008]	53.3647	0.841178	16.9938	7.22011	8.80232	8.0713	0.130182	0.811136	3.63509	0.130182	100
[15388]	Mexican Volcanic Belts	MEXICAN VOLCANIC BELTS / TRANS MEXICAN VOLCANIC BELT / MORELOS / CERRO DEL AGUA	SIERRA CHICHINAUTZIN	19.0095	-98.9848	s_0530 [15388]	2141	43.0784	ANDESITE [15388]	2500 [15388]	14000 [15388]		PLIO-QUATERNARY					VOL					WR [15388]	57.2034	0.828874	15.1237	6.47148	7.31954	8.08682	0.110045	1.13074	3.54366	0.181726	100
[14962]	Mexican Volcanic Belts	MEXICAN VOLCANIC BELTS / TRANS MEXICAN VOLCANIC BELT / JALISCO / MASCOTA VOLCANIC COMPLEX		20.56	-104.9	s_JAL-05-29 [14962]	1189	35.6623	ANDESITE, BASALTIC [14962]				QUATERNARY					VOL					WR [14962]	54.5141	0.709292	17.1243	6.65721	8.10619	8.10619	0.121593	0.810619	3.64779	0.202655	100
[20033]	Mexican Volcanic Belts	MEXICAN VOLCANIC BELTS / TRANS MEXICAN VOLCANIC BELT / MORELOS / CHICHINAUTZIN VOLCANIC FIELD	ATLACHOLOAYA	18.7464	-99.2025	s_AT-9 [20033]	1128	35.1871	ANDESITE, BASALTIC [20033]				PLIO-QUATERNARY					VOL					WR [20033]	54.5931	0.876309	16.0052	6.7083	8.50121	8.10838	0.110798	1.32957	3.52538	0.241741	100
[20034]	Mexican Volcanic Belts	MEXICAN VOLCANIC BELTS / TRANS MEXICAN VOLCANIC BELT / MORELOS / CHICHINAUTZIN VOLCANIC FIELD	LOS CUATES-CAPULHUAC, WESTERN SIERRA CHICHINAUTZIN VOLCANIC FIELD	19.1978	-99.4558	s_MX36 [20034]	2694	47.3863	ANDESITE, BASALTIC [20034]				QUATERNARY					VOL					WR [20034]	52.3164	1.37834	16.4998	7.90295	8.67246	8.12917	0.140852	1.157	3.5213	0.281704	100
[3618][4189][4017]	Mexican Volcanic Belts	MEXICAN VOLCANIC BELTS / TRANS MEXICAN VOLCANIC BELT / JALISCO / MASCOTA VOLCANIC COMPLEX		20.535	-104.785	s_MAS21 [3618] / s_MAS-21 [4189]	1238	36.044	ANDESITE, BASALTIC [3618]				QUATERNARY [3618]					VOL					WR [3618]	53.5961	0.82502	16.8827	6.54135	8.49167	8.12946	0.120735	1.01618	4.11504	0.281714	100			0.52	0.05
[3664]	Mexican Volcanic Belts	MEXICAN VOLCANIC BELTS / TRANS MEXICAN VOLCANIC BELT / MORELOS / CHICHINAUTZIN VOLCANIC FIELD - XITLE	CONE	19.25	-99.22	s_244 [3664]	2910	49.0689	BASALT, ALKALINE [3664]				QUATERNARY [3664]					VOL					WR [3664]	52.2253	1.71411	15.6375	8.36006	7.46792	8.13953	0.150361	1.3332	4.38051	0.591419	100
[6862]	Mexican Volcanic Belts	MEXICAN VOLCANIC BELTS / TRANS MEXICAN VOLCANIC BELT / MORELOS / CHICHINAUTZIN VOLCANIC FIELD / OLDER SERIES		18.9542	-99.1469	s_C3-01 [6862]	1545	38.4355	NOT GIVEN [6862]				Holocene					VOL					WR [6862]	50.2158	1.95361	15.8382	9.3364	8.67165	8.15335	0.159479	1.3157	3.75772	0.598045	100
[7520]	Mexican Volcanic Belts	MEXICAN VOLCANIC BELTS / TRANS MEXICAN VOLCANIC BELT / MEXICO / POPOCATEPETL	CERRO SANTA BARBARA, 31.4 KM W FROM POPOCATEPETL CRATER	18.9825	-98.9245	s_96356A [7520]	1903	41.2244	NOT GIVEN [7520]				PLIO-QUATERNARY					VOL					WR [7520]	52.1166	1.65913	16.179	8.28557	7.86325	8.15485	0.130719	1.29713	3.86124	0.452489	100
[3664]	Mexican Volcanic Belts	MEXICAN VOLCANIC BELTS / TRANS MEXICAN VOLCANIC BELT / MORELOS / CHICHINAUTZIN VOLCANIC FIELD - XITLE	CONE	19.25	-99.22	s_214 [3664]	2910	49.0689	BASALT, ALKALINE [3664]				QUATERNARY [3664]					VOL					WR [3664]	52.5785	1.74589	15.2387	8.48723	7.1753	8.1643	0.151378	1.31194	4.54133	0.60551	100
[3621]	Mexican Volcanic Belts	MEXICAN VOLCANIC BELTS / TRANS MEXICAN VOLCANIC BELT / MICHOACAN / MICHOACAN-GUANAJUATO VOLCANIC FIELD - JORULLO		18.98	-101.72	s_29MIDDLE [3621]	971	33.9641	NOT GIVEN [3621]				QUATERNARY					VOL					WR [3621]	53.5462	0.893776	16.8914	7.28835	8.36534	8.20466	0.130552	0.823479	3.68557	0.170721	100
[7520]	Mexican Volcanic Belts	MEXICAN VOLCANIC BELTS / TRANS MEXICAN VOLCANIC BELT / MEXICO / POPOCATEPETL	CERRO XEXQUIXTLE, 27.8 KM W FROM POPOCATEPETL CRATER	18.9842	-98.9022	s_96355 [7520]	1942	41.5282	NOT GIVEN [7520]				PLIO-QUATERNARY					VOL					WR [7520]	55.8964	1.21889	15.9472	6.50076	7.21178	8.20721	0.121889	1.17826	3.484	0.233621	100
[20033]	Mexican Volcanic Belts	MEXICAN VOLCANIC BELTS / TRANS MEXICAN VOLCANIC BELT / MORELOS / CHICHINAUTZIN VOLCANIC FIELD	ATLACHOLOAYA	18.7103	-99.2094	s_AT-1 [20033]	1105	35.0079	ANDESITE, BASALTIC [20033]				PLIO-QUATERNARY					VOL					WR [20033]	55.0272	0.856337	15.8573	6.65928	8.15031	8.22083	0.11082	1.33992	3.53617	0.241789	100
[7520]	Mexican Volcanic Belts	MEXICAN VOLCANIC BELTS / TRANS MEXICAN VOLCANIC BELT / MEXICO / POPOCATEPETL	QUARRY N XOCHITLAN, 23 KM SW FROM POPOCATEPETL CRATER	18.8989	-98.8078	s_96358 [7520]	1859	40.8816	NOT GIVEN [7520]				PLIO-QUATERNARY					VOL					WR [7520]	57.3296	1.01307	14.9732	6.35194	6.98004	8.23625	0.101307	1.20555	3.57613	0.233006	100
[23383]	Mexican Volcanic Belts	MEXICAN VOLCANIC BELTS / TRANS MEXICAN VOLCANIC BELT / MICHOACAN / MICHOACAN-GUANAJUATO VOLCANIC FIELD - EL ASTILLERO		19.3098	-102.38	s_TANC-1801 [23383]	2150	43.1485	ANDESITE, BASALTIC [23383]				HOLOCENE [23383]				PORPHYRITIC [23383]	VOL					WR [23383]	53.9074	0.82578	17.0796	7.38167	8.08661	8.24773	0.130916	0.674723	3.5146	0.151057	100
[6862]	Mexican Volcanic Belts	MEXICAN VOLCANIC BELTS / TRANS MEXICAN VOLCANIC BELT / MORELOS / CHICHINAUTZIN VOLCANIC FIELD - GUESPALAPA		18.9522	-99.12	s_C3-03 [6862]	1514	38.1941	BASALT [6862]				Holocene					VOL					WR [6862]	50.4162	1.96805	15.7444	9.36925	8.3843	8.27385	0.160657	1.15472	3.92606	0.602465	100
[6862]	Mexican Volcanic Belts	MEXICAN VOLCANIC BELTS / TRANS MEXICAN VOLCANIC BELT / MORELOS / CHICHINAUTZIN VOLCANIC FIELD - CAJETE		19.1058	-99.2397	s_A2-09 [6862]	2998	49.7544	NOT GIVEN [6862]				Holocene					VOL					WR [6862]	51.2875	1.69225	16.9633	8.93434	7.66611	8.27777	0.152914	0.87671	3.68014	0.468938	100
[3664]	Mexican Volcanic Belts	MEXICAN VOLCANIC BELTS / TRANS MEXICAN VOLCANIC BELT / MORELOS / CHICHINAUTZIN VOLCANIC FIELD	CONE NEAR JIUTEPEC	18.88	-99.19	s_253 [3664]	1375	37.1112	BASALT, ALKALINE [3664]				QUATERNARY [3664]					VOL					WR [3664]	52.5413	1.57322	15.2279	8.4409	7.72489	8.3098	0.151271	1.29084	4.286	0.453812	100
[20033]	Mexican Volcanic Belts	MEXICAN VOLCANIC BELTS / TRANS MEXICAN VOLCANIC BELT / MORELOS / CHICHINAUTZIN VOLCANIC FIELD	ATLACHOLOAYA	18.7289	-99.2208	s_AT-8 [20033]	1156	35.4052	ANDESITE, BASALTIC [20033]				PLIO-QUATERNARY					VOL					WR [20033]	54.2166	0.967254	16.1411	6.70025	8.12091	8.33249	0.110831	1.39043	3.69773	0.322418	100
[3621]	Mexican Volcanic Belts	MEXICAN VOLCANIC BELTS / TRANS MEXICAN VOLCANIC BELT / MICHOACAN / MICHOACAN-GUANAJUATO VOLCANIC FIELD - JORULLO		18.97	-101.73	s_42MIDDLE [3621]	856	33.0682	NOT GIVEN [3621]				QUATERNARY					VOL					WR [3621]	53.8245	0.818277	16.7191	7.13059	8.35451	8.3343	0.121226	0.868788	3.65699	0.171737	100
[6862]	Mexican Volcanic Belts	MEXICAN VOLCANIC BELTS / TRANS MEXICAN VOLCANIC BELT / MORELOS / CHICHINAUTZIN VOLCANIC FIELD - GUESPALAPA		18.8944	-99.1417	s_D3-02 [6862]	1404	37.3372	BASALT [6862]				Holocene					VOL					WR [6862]	50.4359	1.98519	15.7001	9.36659	8.38414	8.34384	0.151156	1.13871	3.93007	0.564317	100
[20034]	Mexican Volcanic Belts	MEXICAN VOLCANIC BELTS / TRANS MEXICAN VOLCANIC BELT / MORELOS / CHICHINAUTZIN VOLCANIC FIELD	TEZOYUCA, WESTERN SIERRA CHICHINAUTZIN VOLCANIC FIELD	18.8111	-99.21	s_D-37 [20034]	1207	35.8025	BASALT [20034]				QUATERNARY					VOL					WR [20034]	52.2902	1.63154	15.8087	8.5833	8.03608	8.35022	0.141873	1.21605	3.47588	0.466153	100
[7183]	Mexican Volcanic Belts	MEXICAN VOLCANIC BELTS / TRANS MEXICAN VOLCANIC BELT / MEXICO / TENANGO VOLCANIC FIELD	STRATOVOLCANO	19.2225	-99.398	s_RMS2 [7183]	2854	48.6327	ANDESITE, BASALTIC [7183]				QUATERNARY					VOL					WR [7183]	53.6926	0.906591	15.4935	6.63135	8.30193	8.36304	0.112051	2.21045	3.65692	0.631558	100
[23383]	Mexican Volcanic Belts	MEXICAN VOLCANIC BELTS / TRANS MEXICAN VOLCANIC BELT / MICHOACAN / MICHOACAN-GUANAJUATO VOLCANIC FIELD - EL ASTILLERO		19.2745	-102.388	s_TANC-1802 [23383]	1810	40.4999	ANDESITE, BASALTIC [23383]				HOLOCENE [23383]				PORPHYRITIC [23383]	VOL					WR [23383]	53.718	0.832915	17.1099	7.40592	8.07827	8.37933	0.130457	0.682388	3.50226	0.160562	100
[3618][11188][11205]	Mexican Volcanic Belts	MEXICAN VOLCANIC BELTS / TRANS MEXICAN VOLCANIC BELT / JALISCO / MASCOTA VOLCANIC COMPLEX		20.5417	-104.92	s_MAS42 [3618] / s_MAS 42 [11188]	1263	36.2388	ANDESITE, BASALTIC [3618]				QUATERNARY [3618]					VOL					WR [3618]	54.0287	0.866232	16.7908	6.92035	7.89681	8.44073	0.12087	0.987102	3.81746	0.130942	100			0.69	0.07
[3664]	Mexican Volcanic Belts	MEXICAN VOLCANIC BELTS / TRANS MEXICAN VOLCANIC BELT / MORELOS / CHICHINAUTZIN VOLCANIC FIELD	CONE NEAR PUERTO LAS CRUCES	19.19	-99.25	s_238 [3664]	3273	51.8967	ANDESITE, BASALTIC [3664]				QUATERNARY [3664]					VOL					WR [3664]	53.6367	1.26981	16.3551	7.32426	7.1922	8.46201	0.13206	0.883787	4.43925	0.304754	100
[6862]	Mexican Volcanic Belts	MEXICAN VOLCANIC BELTS / TRANS MEXICAN VOLCANIC BELT / MORELOS / CHICHINAUTZIN VOLCANIC FIELD - GUESPALAPA		18.9014	-99.1308	s_D3-01 [6862]	1411	37.3917	BASALT [6862]				Holocene					VOL					WR [6862]	50.2683	1.89466	15.9251	9.20599	8.49605	8.46613	0.149578	1.14677	3.88903	0.558426	100
[23383]	Mexican Volcanic Belts	MEXICAN VOLCANIC BELTS / TRANS MEXICAN VOLCANIC BELT / MICHOACAN / MICHOACAN-GUANAJUATO VOLCANIC FIELD - EL ASTILLERO		19.3175	-102.376	s_TANC-1828A [23383]	2150	43.1485	ANDESITE, BASALTIC [23383]				HOLOCENE [23383]				PORPHYRITIC [23383]	VOL					WR [23383]	52.7446	0.891229	17.6322	7.99068	8.18311	8.49706	0.131659	0.597529	3.18007	0.151914	100
[15008]	Mexican Volcanic Belts	MEXICAN VOLCANIC BELTS / TRANS MEXICAN VOLCANIC BELT / MICHOACAN / MICHOACAN-GUANAJUATO VOLCANIC FIELD		19.3968	-101.493	s_H-520 [15008]	2832	48.4613	TRACHYANDESITE, BASALTIC [15008]				PLIO-QUATERNARY					VOL					WR [15008]	50.9633	1.02207	16.2129	7.73299	8.79783	8.49722	0.140284	1.64333	4.39892	0.591198	100
[3664]	Mexican Volcanic Belts	MEXICAN VOLCANIC BELTS / TRANS MEXICAN VOLCANIC BELT / MORELOS / CHICHINAUTZIN VOLCANIC FIELD	CONE NEAR TEZOYUCA	18.81	-99.2	s_252 [3664]	1213	35.8493	BASALT, ALKALINE [3664]				QUATERNARY [3664]					VOL					WR [3664]	51.9533	1.61095	15.4048	8.5582	7.90375	8.49778	0.151027	1.19815	4.24889	0.473218	100
[3664]	Mexican Volcanic Belts	MEXICAN VOLCANIC BELTS / TRANS MEXICAN VOLCANIC BELT / MORELOS / CHICHINAUTZIN VOLCANIC FIELD - CERRO SANTA BARBARA		18.98	-99.22	s_258 [3664]	1929	41.4269	BASALT, ALKALINE [3664]				QUATERNARY [3664]					VOL					WR [3664]	51.4401	1.63719	15.5634	8.4285	7.95351	8.49924	0.151592	1.39464	4.42648	0.505306	100
[6862]	Mexican Volcanic Belts	MEXICAN VOLCANIC BELTS / TRANS MEXICAN VOLCANIC BELT / MORELOS / CHICHINAUTZIN VOLCANIC FIELD - SUCHIOOC		19.0208	-99.1189	s_B3-01 [6862]	2254	43.9587	NOT GIVEN [6862]				Holocene					VOL					WR [6862]	50.313	1.70399	16.2635	8.60978	8.7216	8.51994	0.141159	1.30068	4.01294	0.413394	100
[3621]	Mexican Volcanic Belts	MEXICAN VOLCANIC BELTS / TRANS MEXICAN VOLCANIC BELT / MICHOACAN / MICHOACAN-GUANAJUATO VOLCANIC FIELD - JORULLO		19.48	-102.25	s_JOR31 [3621]	2597	46.6306	BASALT [3621]				QUATERNARY					VOL					WR [3621]	53.076	0.886278	16.9601	7.36382	8.38943	8.52035	0.130927	0.795636	3.70625	0.171213	100			0.21	0.1
[6862]	Mexican Volcanic Belts	MEXICAN VOLCANIC BELTS / TRANS MEXICAN VOLCANIC BELT / MORELOS / CHICHINAUTZIN VOLCANIC FIELD - GUESPALAPA		18.9711	-99.1764	s_C2-04 [6862]	1671	39.4171	BASALT [6862]				Holocene					VOL					WR [6862]	49.2294	1.96348	15.657	9.82234	9.56306	8.56606	0.162776	0.874919	3.82523	0.335725	100
[6862]	Mexican Volcanic Belts	MEXICAN VOLCANIC BELTS / TRANS MEXICAN VOLCANIC BELT / MORELOS / CHICHINAUTZIN VOLCANIC FIELD - GUESPALAPA		18.9236	-99.1553	s_C3-02 [6862]	1440	37.6176	BASALT [6862]				Holocene					VOL					WR [6862]	50.4322	1.76725	16.4607	9.30477	8.02836	8.63427	0.14138	0.959364	3.91824	0.35345	100
[6862]	Mexican Volcanic Belts	MEXICAN VOLCANIC BELTS / TRANS MEXICAN VOLCANIC BELT / MORELOS / CHICHINAUTZIN VOLCANIC FIELD / OLDER SERIES		18.9989	-99.1964	s_C2-01 [6862]	2109	42.8291	NOT GIVEN [6862]				Holocene					VOL					WR [6862]	49.1719	1.94691	16.1244	9.42393	9.5648	8.63628	0.159746	0.968461	3.62424	0.379397	100
[20283]	Mexican Volcanic Belts	MEXICAN VOLCANIC BELTS / TRANS MEXICAN VOLCANIC BELT / MICHOACAN / MICHOACAN-GUANAJUATO VOLCANIC FIELD - JORULLO	1759 TO 1774 ERUPTION	18.9672	-101.718	s_JOR-0603A1 [20283]	1015	34.3068	ANDESITE, BASALTIC [20283]				Holocene					VOL					WR [20283]	53.3313	0.792695	16.6165	7.39514	8.76982	8.63937	0.130444	0.752559	3.42163	0.150512	100
[20034]	Mexican Volcanic Belts	MEXICAN VOLCANIC BELTS / TRANS MEXICAN VOLCANIC BELT / MORELOS / CHICHINAUTZIN VOLCANIC FIELD	CUATE GRANDE, WESTERN SIERRA CHICHINAUTZIN VOLCANIC FIELD	19.1909	-99.4383	s_D-53 [20034]	2740	47.7446	ANDESITE, BASALTIC [20034]				QUATERNARY					VOL					WR [20034]	53.2954	1.27136	15.5614	7.46542	8.25875	8.65541	0.12205	1.34255	3.65134	0.376322	100
[3664]	Mexican Volcanic Belts	MEXICAN VOLCANIC BELTS / TRANS MEXICAN VOLCANIC BELT / MORELOS / CHICHINAUTZIN VOLCANIC FIELD - XITLE	CONE	19.25	-99.22	s_307 [3664]	2910	49.0689	BASALT, ALKALINE [3664]				QUATERNARY [3664]					VOL					WR [3664]	50.9497	1.80886	15.5763	8.71269	8.02934	8.6725	0.150739	1.14561	4.44176	0.512511	100
[3664]	Mexican Volcanic Belts	MEXICAN VOLCANIC BELTS / TRANS MEXICAN VOLCANIC BELT / MORELOS / CHICHINAUTZIN VOLCANIC FIELD	CERRO JUMILTEPEC CONE	18.74	-99.2	s_256 [3664]	1172	35.5299	ANDESITE, BASALTIC [3664]				QUATERNARY [3664]					VOL					WR [3664]	54.3115	0.942345	15.4018	6.72814	7.86301	8.67362	0.121593	1.49965	4.16456	0.293849	100
[10275]	Mexican Volcanic Belts	MEXICAN VOLCANIC BELTS / TRANS MEXICAN VOLCANIC BELT / MEXICO / AMEALCO CALDERA		18.8526	-100.092	s_Z-714 [10275]	1351	36.9243	ANDESITE, BASALTIC [10275]				QUATERNARY [10275]					VOL					WR [10275]	52.7547	0.881887	15.9532	7.48117	8.26397	8.71978	0.118906	1.91241	3.53746	0.376536	100
[7520]	Mexican Volcanic Belts	MEXICAN VOLCANIC BELTS / TRANS MEXICAN VOLCANIC BELT / MEXICO / POPOCATEPETL	CERRO CITLALTEPEC, 32.2 KM W FROM POPOCATEPETL CRATER	18.9739	-98.9388	s_96357 [7520]	1845	40.7725	BASALT, ALKALINE [7520]				PLIO-QUATERNARY					VOL					WR [7520]	51.8939	1.58672	16.3758	8.62525	8.35062	8.73713	0.142398	0.915416	3.33618	0.0366166	100
[23383]	Mexican Volcanic Belts	MEXICAN VOLCANIC BELTS / TRANS MEXICAN VOLCANIC BELT / MICHOACAN / MICHOACAN-GUANAJUATO VOLCANIC FIELD - EL ASTILLERO		19.3144	-102.378	s_TANC-1806A [23383]	2150	43.1485	ANDESITE, BASALTIC [23383]				HOLOCENE [23383]				PORPHYRITIC [23383]	VOL					WR [23383]	52.794	0.864322	17.206	7.79899	8.33166	8.75377	0.130653	0.623116	3.33668	0.160804	100
[20034]	Mexican Volcanic Belts	MEXICAN VOLCANIC BELTS / TRANS MEXICAN VOLCANIC BELT / MORELOS / CHICHINAUTZIN VOLCANIC FIELD	CAPULHUAC, WESTERN SIERRA CHICHINAUTZIN VOLCANIC FIELD	19.1972	-99.4573	s_D-45 [20034]	2694	47.3863	BASALT [20034]				QUATERNARY					VOL					WR [20034]	52.5077	1.37155	15.8649	7.57421	8.57728	8.79222	0.122825	1.21801	3.65404	0.317298	100
[3664]	Mexican Volcanic Belts	MEXICAN VOLCANIC BELTS / TRANS MEXICAN VOLCANIC BELT / MORELOS / CHICHINAUTZIN VOLCANIC FIELD	LAS TETILLAS CONE	18.88	-99.11	s_133 [3664]	1485	37.9681	ANDESITE, BASALTIC [3664]				QUATERNARY [3664]					VOL					WR [3664]	53.6872	0.972447	15.701	7.59724	7.91126	8.79254	0.141815	0.90154	4.08225	0.212723	100
[3618][11188][11205]	Mexican Volcanic Belts	MEXICAN VOLCANIC BELTS / TRANS MEXICAN VOLCANIC BELT / JALISCO / MASCOTA VOLCANIC COMPLEX		20.5555	-104.914	s_MAS108 [3618] / s_MAS 108 [11188]	1263	36.2388	ANDESITE, BASALTIC [3618]				QUATERNARY [3618]					VOL					WR [3618]	53.1227	0.790487	16.7703	7.0928	8.62531	8.80542	0.140086	0.830511	3.59221	0.230142	100			0.03	0.13
[9998]	Mexican Volcanic Belts	MEXICAN VOLCANIC BELTS / TRANS MEXICAN VOLCANIC BELT / MEXICO / ZITACUARO VOLCANIC FIELD - VALLE DE BRAVO	SN. FR. LA ALABARRADA	19.07	-100.07	s_ZIT-99-7 [9998]	2082	42.6188	NOT GIVEN [9998]				PLIO-QUATERNARY					VOL					WR [9998]	52.2426	0.809963	16.503	6.92518	8.90959	8.80834	0.131619	2.02491	3.23985	0.404981	100
[7520]	Mexican Volcanic Belts	MEXICAN VOLCANIC BELTS / TRANS MEXICAN VOLCANIC BELT / MEXICO / POPOCATEPETL	CERRO PARTIDO, 27.6 KM W FROM POPOCATEPETL CRATER	18.9928	-98.8947	s_96354A [7520]	2045	42.3306	NOT GIVEN [7520]				PLIO-QUATERNARY					VOL					WR [7520]	54.6263	1.19904	15.3577	7.41407	7.36411	8.84293	0.119904	1.31894	3.47722	0.279776	100
[15008]	Mexican Volcanic Belts	MEXICAN VOLCANIC BELTS / TRANS MEXICAN VOLCANIC BELT / MICHOACAN / MICHOACAN-GUANAJUATO VOLCANIC FIELD		19.0185	-102.079	s_H-542 [15008]	488	30.2015	TRACHYBASALT [15008]				PLIO-QUATERNARY					VOL					WR [15008]	50.7422	1.09757	16.555	7.8144	9.32933	8.86185	0.132115	1.82928	3.31303	0.325205	100
[6909][10275]	Mexican Volcanic Belts	MEXICAN VOLCANIC BELTS / TRANS MEXICAN VOLCANIC BELT / MEXICO / AMEALCO CALDERA		18.8547	-100.129	s_Z-520 [6909]	1329	36.7529	ANDESITE, BASALTIC [6909]				QUATERNARY [6909]					VOL					WR [6909]	53.1713	0.860344	15.9364	7.7431	8.17327	8.86355	0.120048	1.2605	3.63145	0.240096	100
[15008]	Mexican Volcanic Belts	MEXICAN VOLCANIC BELTS / TRANS MEXICAN VOLCANIC BELT / MICHOACAN / MICHOACAN-GUANAJUATO VOLCANIC FIELD		19.5653	-102.293	s_H-417A [15008]	2232	43.7873	BASALT, SUBALKALINE [15008]				PLIO-QUATERNARY					VOL					WR [15008]	50.9927	1.19816	16.8047	8.28009	9.0471	8.9151	0.142154	1.13723	3.24924	0.233539	100
[20283]	Mexican Volcanic Belts	MEXICAN VOLCANIC BELTS / TRANS MEXICAN VOLCANIC BELT / MICHOACAN / MICHOACAN-GUANAJUATO VOLCANIC FIELD - JORULLO	1759 TO 1774 ERUPTION	18.9672	-101.718	s_JOR-0603A2 [20283]	1015	34.3068	ANDESITE, BASALTIC [20283]				Holocene					VOL					WR [20283]	52.9853	1.0001	16.5217	7.56076	8.58086	8.9509	0.130013	0.740074	3.39034	0.140014	100
[23383]	Mexican Volcanic Belts	MEXICAN VOLCANIC BELTS / TRANS MEXICAN VOLCANIC BELT / MICHOACAN / MICHOACAN-GUANAJUATO VOLCANIC FIELD - EL ASTILLERO		19.2595	-102.411	s_TANC-1823 [23383]	1603	38.8874	ANDESITE, BASALTIC [23383]				HOLOCENE [23383]				PORPHYRITIC [23383]	VOL					WR [23383]	52.763	0.83543	16.9804	7.73025	8.44489	8.96829	0.130851	0.634122	3.36185	0.150981	100
[9998]	Mexican Volcanic Belts	MEXICAN VOLCANIC BELTS / TRANS MEXICAN VOLCANIC BELT / MEXICO / ZITACUARO VOLCANIC FIELD - VALLE DE BRAVO	C. PELON	19.07	-100.25	s_ZIT-99-14 [9998]	1412	37.3995	NOT GIVEN [9998]				PLIO-QUATERNARY					VOL					WR [9998]	55.5275	0.809143	15.576	6.73612	7.48458	9.00172	0.111257	1.31486	3.23657	0.202286	100
[9998]	Mexican Volcanic Belts	MEXICAN VOLCANIC BELTS / TRANS MEXICAN VOLCANIC BELT / MEXICO / ZITACUARO VOLCANIC FIELD - VALLE DE BRAVO	C. PELON	19.03	-100.14	s_ZIT-99-11 [9998]	1700	39.643	NOT GIVEN [9998]				PLIO-QUATERNARY					VOL					WR [9998]	53.2496	1.01235	15.1853	6.74226	9.11116	9.00992	0.121482	1.51853	3.64446	0.40494	100
[23383]	Mexican Volcanic Belts	MEXICAN VOLCANIC BELTS / TRANS MEXICAN VOLCANIC BELT / MICHOACAN / MICHOACAN-GUANAJUATO VOLCANIC FIELD - EL ASTILLERO		19.3115	-102.39	s_TANC-1808A [23383]	2150	43.1485	ANDESITE, BASALTIC [23383]				HOLOCENE [23383]				PORPHYRITIC [23383]	VOL					WR [23383]	52.4393	0.853242	17.0448	7.96025	8.41197	9.06444	0.140534	0.602289	3.33266	0.150572	100
[3664]	Mexican Volcanic Belts	MEXICAN VOLCANIC BELTS / TRANS MEXICAN VOLCANIC BELT / MORELOS / CHICHINAUTZIN VOLCANIC FIELD - CERRO TEZONTLALA	CONE	18.97	-98.999	s_257 [3664]	1774	40.2195	BASALT, ALKALINE [3664]				QUATERNARY [3664]					VOL					WR [3664]	51.8593	1.56784	15.1759	8.46231	7.59799	9.06533	0.150754	1.21608	4.45226	0.452261	100
[3621]	Mexican Volcanic Belts	MEXICAN VOLCANIC BELTS / TRANS MEXICAN VOLCANIC BELT / MICHOACAN / MICHOACAN-GUANAJUATO VOLCANIC FIELD - JORULLO		18.97	-101.75	s_19EARLY [3621]	720	32.0088	NOT GIVEN [3621]				QUATERNARY					VOL					WR [3621]	52.8198	0.823114	16.4121	7.3896	8.63266	9.08437	0.130494	0.782962	3.77428	0.15057	100
[6909][10275]	Mexican Volcanic Belts	MEXICAN VOLCANIC BELTS / TRANS MEXICAN VOLCANIC BELT / MEXICO / AMEALCO CALDERA		19.1167	-100.262	s_Z-374 [6909]	1764	40.1416	ANDESITE, BASALTIC [6909]				QUATERNARY [6909]					VOL					WR [6909]	54.8281	0.84966	15.1939	7.16713	7.67693	9.08637	0.119952	1.2595	3.53858	0.279888	100
[15008]	Mexican Volcanic Belts	MEXICAN VOLCANIC BELTS / TRANS MEXICAN VOLCANIC BELT / MICHOACAN / MICHOACAN-GUANAJUATO VOLCANIC FIELD		19.2978	-101.913	s_H-426B [15008]	982	34.0498	BASALT, SUBALKALINE [15008]				PLIO-QUATERNARY					VOL					WR [15008]	51.7373	0.839202	17.2795	7.80915	9.00878	9.12	0.141552	0.677428	3.2557	0.131441	100
[14948]	Mexican Volcanic Belts	MEXICAN VOLCANIC BELTS / TRANS MEXICAN VOLCANIC BELT / MICHOACAN	TZITZIO GAP	19.09	-102.29	s_BH-11 [14948]	392	29.4537	NOT GIVEN [14948]				QUATERNARY [14948]					VOL					WR [14948]	51.4943	0.789605	16.8116	8.44578	9.04548	9.17541	0.129935	0.529735	3.42829	0.149925	100
[3664]	Mexican Volcanic Belts	MEXICAN VOLCANIC BELTS / TRANS MEXICAN VOLCANIC BELT / MORELOS / CHICHINAUTZIN VOLCANIC FIELD	OLD FLOW NEAR EL CAPULIN	19.13	-99.29	s_232 [3664]	3027	49.9803	BASALT, ALKALINE [3664]				QUATERNARY [3664]					VOL					WR [3664]	52.0812	0.995375	14.7798	7.56083	9.02876	9.17957	0.14076	1.52825	4.30324	0.402172	100
[3664]	Mexican Volcanic Belts	MEXICAN VOLCANIC BELTS / TRANS MEXICAN VOLCANIC BELT / MORELOS / CHICHINAUTZIN VOLCANIC FIELD	AJUSCO	19.196	-99.26	s_239 [3664]	3513	53.7663	ANDESITE, BASALTIC [3664]				QUATERNARY [3664]					VOL					WR [3664]	54.1143	0.94244	15.5047	6.84029	7.60032	9.18119	0.121605	1.00324	4.43859	0.253344	100
[23383]	Mexican Volcanic Belts	MEXICAN VOLCANIC BELTS / TRANS MEXICAN VOLCANIC BELT / MICHOACAN / MICHOACAN-GUANAJUATO VOLCANIC FIELD - EL ASTILLERO		19.311	-102.392	s_TANC-1826A [23383]	2125	42.9537	ANDESITE, BASALTIC [23383]				HOLOCENE [23383]				PORPHYRITIC [23383]	VOL					WR [23383]	52.5637	0.836104	16.8732	7.90773	8.4114	9.22736	0.14103	0.604412	3.28397	0.151103	100
[3621]	Mexican Volcanic Belts	MEXICAN VOLCANIC BELTS / TRANS MEXICAN VOLCANIC BELT / MICHOACAN / MICHOACAN-GUANAJUATO VOLCANIC FIELD - JORULLO		18.97	-101.73	s_39BMIDDLE [3621]	856	33.0682	NOT GIVEN [3621]				QUATERNARY					VOL					WR [3621]	53.382	0.793001	16.1913	7.27905	8.41184	9.23495	0.130494	0.793001	3.62372	0.160608	100
[23383]	Mexican Volcanic Belts	MEXICAN VOLCANIC BELTS / TRANS MEXICAN VOLCANIC BELT / MICHOACAN / MICHOACAN-GUANAJUATO VOLCANIC FIELD - EL ASTILLERO		19.3115	-102	s_TANC-1808E [23383]	1264	36.2466	ANDESITE, BASALTIC [23383]				HOLOCENE [23383]				PORPHYRITIC [23383]	VOL					WR [23383]	52.5961	0.825116	16.935	7.90904	8.35178	9.2574	0.140873	0.583618	3.25015	0.150936	100
[20283]	Mexican Volcanic Belts	MEXICAN VOLCANIC BELTS / TRANS MEXICAN VOLCANIC BELT / MICHOACAN / MICHOACAN-GUANAJUATO VOLCANIC FIELD - JORULLO	1759 TO 1774 ERUPTION	18.9672	-101.718	s_JOR-0603D [20283]	1015	34.3068	ANDESITE, BASALTIC [20283]				Holocene					VOL					WR [20283]	53.3706	0.778987	16.4187	7.33047	8.25926	9.25796	0.129831	0.778987	3.51543	0.159792	100
[7520]	Mexican Volcanic Belts	MEXICAN VOLCANIC BELTS / TRANS MEXICAN VOLCANIC BELT / MEXICO / POPOCATEPETL	CERRO PELAGATOS, 30 KM NW FROM POPOCATEPETL CRATER	19.115	-98.9092	s_96365 [7520]	2721	47.5966	ANDESITE, BASALTIC [7520]				PLIO-QUATERNARY					VOL					WR [7520]	54.8047	0.803294	15.5839	7.13927	7.83211	9.268	0.130535	0.994076	3.27342	0.1707	100
[14962]	Mexican Volcanic Belts	MEXICAN VOLCANIC BELTS / TRANS MEXICAN VOLCANIC BELT / JALISCO / MASCOTA VOLCANIC COMPLEX		20.54	-104.93	s_JAL-05-31 [14962]	1487	37.9837	ANDESITE, BASALTIC [14962]				QUATERNARY					VOL					WR [14962]	52.9245	0.809553	16.8994	7.28597	8.5003	9.30986	0.121433	0.708359	3.23821	0.202388	100
[20283]	Mexican Volcanic Belts	MEXICAN VOLCANIC BELTS / TRANS MEXICAN VOLCANIC BELT / MICHOACAN / MICHOACAN-GUANAJUATO VOLCANIC FIELD - JORULLO	1759 TO 1774 ERUPTION	18.9904	-101.753	s_JOR-0719 [20283]	703	31.8764	ANDESITE, BASALTIC [20283]				Holocene					VOL					WR [20283]	52.8111	0.810324	16.4866	7.63305	8.5034	9.32373	0.130052	0.730292	3.43137	0.140056	100
[23383]	Mexican Volcanic Belts	MEXICAN VOLCANIC BELTS / TRANS MEXICAN VOLCANIC BELT / MICHOACAN / MICHOACAN-GUANAJUATO VOLCANIC FIELD - EL ASTILLERO		19.3115	-102.39	s_TANC-1808C [23383]	2150	43.1485	ANDESITE, BASALTIC [23383]				HOLOCENE [23383]				PORPHYRITIC [23383]	VOL					WR [23383]	52.5504	0.826613	16.7742	7.96371	8.3871	9.3246	0.131048	0.604839	3.28629	0.15121	100
[3621][12475]	Mexican Volcanic Belts	MEXICAN VOLCANIC BELTS / TRANS MEXICAN VOLCANIC BELT / MICHOACAN / MICHOACAN-GUANAJUATO VOLCANIC FIELD - JORULLO		18.9915	-101.752	s_JOR44 [3621] / s_JOR 44 [12475]	671	31.6271	BASALT [3621] / ANDESITE, BASALTIC [12475]				PLEISTOCENE [12475]				PORPHYRITIC [3621]	VOL					WR [3621]	52.603	0.817821	16.5987	7.52566	8.54169	9.3797	0.141352	0.747145	3.5035	0.141352	100			0.34	0.1										0
[14948]	Mexican Volcanic Belts	MEXICAN VOLCANIC BELTS / TRANS MEXICAN VOLCANIC BELT / MICHOACAN	TZITZIO GAP	19.12	-102.4	s_BH-04 [14948]	283	28.6046	NOT GIVEN [14948]				QUATERNARY [14948]					VOL					WR [14948]	51.7652	0.770077	16.6717	8.43084	8.62086	9.38094	0.130013	0.550055	3.54035	0.140014	100
[15008]	Mexican Volcanic Belts	MEXICAN VOLCANIC BELTS / TRANS MEXICAN VOLCANIC BELT / MICHOACAN / MICHOACAN-GUANAJUATO VOLCANIC FIELD		19.2728	-101.638	s_H-536L [15008]	2288	44.2235	ANDESITE, BASALTIC [15008]				PLIO-QUATERNARY					VOL					WR [15008]	52.4867	0.729545	16.8201	6.94253	8.50122	9.38275	0.131723	0.770075	4.09356	0.141856	100
[20034]	Mexican Volcanic Belts	MEXICAN VOLCANIC BELTS / TRANS MEXICAN VOLCANIC BELT / MORELOS / CHICHINAUTZIN VOLCANIC FIELD	PELAGATOS, WESTERN SIERRA CHICHINAUTZIN VOLCANIC FIELD	19.1	-99.8333	s_D-25 [20034]	3342	52.4342	ANDESITE, BASALTIC [20034]				QUATERNARY					VOL					WR [20034]	54.839	0.822586	15.6596	7.01737	7.62669	9.38357	0.121865	0.974916	3.40205	0.152331	100
[3621]	Mexican Volcanic Belts	MEXICAN VOLCANIC BELTS / TRANS MEXICAN VOLCANIC BELT / MICHOACAN / MICHOACAN-GUANAJUATO VOLCANIC FIELD - JORULLO		18.97	-101.75	s_25EARLY [3621]	720	32.0088	NOT GIVEN [3621]				QUATERNARY					VOL					WR [3621]	53.0839	0.831941	16.1777	7.46409	8.43969	9.39191	0.130304	0.751754	3.57835	0.150351	100
[20283]	Mexican Volcanic Belts	MEXICAN VOLCANIC BELTS / TRANS MEXICAN VOLCANIC BELT / MICHOACAN / MICHOACAN-GUANAJUATO VOLCANIC FIELD - JORULLO	1759 TO 1774 ERUPTION	18.9746	-101.741	s_JOR-0609B [20283]	793	32.5775	ANDESITE, BASALTIC [20283]				Holocene					VOL					WR [20283]	53.3145	0.756735	16.3051	7.48663	8.36444	9.40369	0.131167	0.787004	3.29936	0.151347	100
[20283]	Mexican Volcanic Belts	MEXICAN VOLCANIC BELTS / TRANS MEXICAN VOLCANIC BELT / MICHOACAN / MICHOACAN-GUANAJUATO VOLCANIC FIELD - JORULLO	1759 TO 1774 ERUPTION	18.9973	-101.749	s_JOR-0721 [20283]	671	31.6271	ANDESITE, BASALTIC [20283]				Holocene					VOL					WR [20283]	52.7452	0.802971	16.4107	7.67841	8.4312	9.47506	0.130483	0.722674	3.46281	0.14052	100
[15008]	Mexican Volcanic Belts	MEXICAN VOLCANIC BELTS / TRANS MEXICAN VOLCANIC BELT / MICHOACAN / MICHOACAN-GUANAJUATO VOLCANIC FIELD		19.6122	-102.095	s_H-517A [15008]	2323	44.4962	ANDESITE, BASALTIC [15008]				PLIO-QUATERNARY					VOL					WR [15008]	52.5218	0.818285	16.7496	7.33177	8.81929	9.49615	0.13133	0.959717	2.94987	0.22225	100
[10275]	Mexican Volcanic Belts	MEXICAN VOLCANIC BELTS / TRANS MEXICAN VOLCANIC BELT / MEXICO / AMEALCO CALDERA		19.0292	-100.144	s_Z-351 [10275]	1855	40.8504	ANDESITE, BASALTIC [10275]				QUATERNARY [10275]					VOL					WR [10275]	52.9472	1.01626	14.6341	7.11382	8.84146	9.55285	0.101626	1.42276	4.06504	0.304878	100
[20283]	Mexican Volcanic Belts	MEXICAN VOLCANIC BELTS / TRANS MEXICAN VOLCANIC BELT / MICHOACAN / MICHOACAN-GUANAJUATO VOLCANIC FIELD - JORULLO	1759 TO 1774 ERUPTION	18.9672	-101.718	s_JOR-0603C [20283]	1015	34.3068	ANDESITE, BASALTIC [20283]				Holocene					VOL					WR [20283]	53.1764	0.771543	16.2425	7.39479	8.36673	9.58918	0.130261	0.761523	3.41683	0.150301	100
[14950]	Mexican Volcanic Belts	MEXICAN VOLCANIC BELTS / TRANS MEXICAN VOLCANIC BELT / PUEBLA / PICO DE ORIZABA (=VOLCAN CITLALTEPETL)	C.RESBALADERO	18.9778	-97.4603	s_CS-6 [14950]	2533	46.1321	BASALT [14950]		650000		PLIO-QUATERNARY					VOL					WR [14950]	50.7738	0.984104	15.6158	9.37147	9.33151	9.60126	0.145867	0.939145	3.03724	0.199818	100
[14950]	Mexican Volcanic Belts	MEXICAN VOLCANIC BELTS / TRANS MEXICAN VOLCANIC BELT / PUEBLA / PICO DE ORIZABA (=VOLCAN CITLALTEPETL)	N EL VERADERO	18.9747	-97.4847	s_CS-3 [14950]	2534	46.1399	BASALT [14950]	46000 [14950]	46000 [14950]		PLIO-QUATERNARY					VOL					WR [14950]	50.2522	0.977658	15.7875	9.62555	9.66582	9.60541	0.154049	0.84576	2.88464	0.201371	100
[3664]	Mexican Volcanic Belts	MEXICAN VOLCANIC BELTS / TRANS MEXICAN VOLCANIC BELT / MORELOS / CHICHINAUTZIN VOLCANIC FIELD - SUCHIOOC GRANDE		19.06	-99.11	s_296 [3664]	3128	50.7671	ANDESITE, BASALTIC [3664]				QUATERNARY [3664]					VOL					WR [3664]	53.2429	1.21287	14.9039	7.75003	7.70891	9.72351	0.133621	0.904512	4.11142	0.308356	100
[20283]	Mexican Volcanic Belts	MEXICAN VOLCANIC BELTS / TRANS MEXICAN VOLCANIC BELT / MICHOACAN / MICHOACAN-GUANAJUATO VOLCANIC FIELD - JORULLO	1759 TO 1774 ERUPTION	18.9904	-101.753	s_JOR-0611 [20283]	703	31.8764	ANDESITE, BASALTIC [20283]				Holocene					VOL					WR [20283]	52.803	0.789447	16.3186	7.5747	8.34416	9.75317	0.129909	0.749475	3.39762	0.139902	100
[20283]	Mexican Volcanic Belts	MEXICAN VOLCANIC BELTS / TRANS MEXICAN VOLCANIC BELT / MICHOACAN / MICHOACAN-GUANAJUATO VOLCANIC FIELD - JORULLO	1759 TO 1774 ERUPTION	18.9672	-101.718	s_JOR-0603A3 [20283]	1015	34.3068	ANDESITE, BASALTIC [20283]				Holocene					VOL					WR [20283]	52.9771	0.761828	16.259	7.42783	8.38011	9.80353	0.130313	0.751804	3.36808	0.140337	100
[20283]	Mexican Volcanic Belts	MEXICAN VOLCANIC BELTS / TRANS MEXICAN VOLCANIC BELT / MICHOACAN / MICHOACAN-GUANAJUATO VOLCANIC FIELD - JORULLO	1759 TO 1774 ERUPTION	18.9672	-101.718	s_JOR-0603A [20283]	1015	34.3068	ANDESITE, BASALTIC [20283]				Holocene					VOL					WR [20283]	53.0653	0.763819	16.0704	7.41709	8.38191	9.8794	0.130653	0.743719	3.39698	0.150754	100
[14962]	Mexican Volcanic Belts	MEXICAN VOLCANIC BELTS / TRANS MEXICAN VOLCANIC BELT / JALISCO / MASCOTA VOLCANIC COMPLEX		20.59	-104.7	s_JAL-05-24 [14962]	2213	43.6393	BASALT [14962]				QUATERNARY					VOL					WR [14962]	50.8492	1.01092	16.0736	7.27861	9.19935	9.907	0.12131	1.51638	3.53821	0.505459	100
[15388]	Mexican Volcanic Belts	MEXICAN VOLCANIC BELTS / TRANS MEXICAN VOLCANIC BELT / MORELOS / CERRO PELAGATOS	SIERRA CHICHINAUTZIN	19.1081	-98.9398	s_0518 [15388]	2831	48.4535	ANDESITE, BASALTIC [15388]	2500 [15388]	14000 [15388]		PLIO-QUATERNARY					VOL					WR [15388]	53.9867	0.864638	15.6405	7.16646	7.74424	9.91343	0.122651	0.932552	3.45652	0.172319	100
[15388]	Mexican Volcanic Belts	MEXICAN VOLCANIC BELTS / TRANS MEXICAN VOLCANIC BELT / MORELOS / CERRO PELAGATOS	SIERRA CHICHINAUTZIN	19.0998	-98.9316	s_0515 [15388]	2831	48.4535	ANDESITE, BASALTIC [15388]	2500 [15388]	14000 [15388]		PLIO-QUATERNARY					VOL					WR [15388]	53.8187	0.824414	15.6921	7.10528	7.9821	9.91716	0.124972	0.896978	3.47705	0.161255	100
[20283]	Mexican Volcanic Belts	MEXICAN VOLCANIC BELTS / TRANS MEXICAN VOLCANIC BELT / MICHOACAN / MICHOACAN-GUANAJUATO VOLCANIC FIELD - JORULLO	1759 TO 1774 ERUPTION	18.9672	-101.718	s_JOR-0603B [20283]	1015	34.3068	ANDESITE, BASALTIC [20283]				Holocene					VOL					WR [20283]	53.0405	0.763896	16.072	7.43793	8.34255	9.9407	0.130666	0.743793	3.37722	0.150769	100
[20283]	Mexican Volcanic Belts	MEXICAN VOLCANIC BELTS / TRANS MEXICAN VOLCANIC BELT / MICHOACAN / MICHOACAN-GUANAJUATO VOLCANIC FIELD - JORULLO	1759 TO 1774 ERUPTION	18.9672	-101.718	s_JOR-1290C [20283]	1015	34.3068	ANDESITE, BASALTIC [20283]				Holocene					VOL					WR [20283]	53.4335	0.696656	16.2918	6.99642	8.01154	9.98209	0.129379	0.746417	3.5629	0.149283	100
[20283]	Mexican Volcanic Belts	MEXICAN VOLCANIC BELTS / TRANS MEXICAN VOLCANIC BELT / MICHOACAN / MICHOACAN-GUANAJUATO VOLCANIC FIELD - JORULLO	1759 TO 1774 ERUPTION	18.9672	-101.718	s_JOR-0603A4 [20283]	1015	34.3068	ANDESITE, BASALTIC [20283]				Holocene					VOL					WR [20283]	52.9593	0.757274	16.1519	7.41331	8.37983	10.0139	0.129534	0.727381	3.32802	0.139498	100
[20034]	Mexican Volcanic Belts	MEXICAN VOLCANIC BELTS / TRANS MEXICAN VOLCANIC BELT / MORELOS / CHICHINAUTZIN VOLCANIC FIELD	TENANGO, WESTERN SIERRA CHICHINAUTZIN VOLCANIC FIELD	19.0896	-99.6265	s_XTN [20034]	2870	48.7573	BASALT [20034]				QUATERNARY					VOL					WR [20034]	49.7417	1.39803	13.879	7.10161	14.4869	10.0598	0.131699	0.212744	2.64411	0.344443	100
[20283]	Mexican Volcanic Belts	MEXICAN VOLCANIC BELTS / TRANS MEXICAN VOLCANIC BELT / MICHOACAN / MICHOACAN-GUANAJUATO VOLCANIC FIELD - JORULLO	1759 TO 1774 ERUPTION	18.9672	-101.718	s_JOR-1290E [20283]	1015	34.3068	ANDESITE, BASALTIC [20283]				Holocene					VOL					WR [20283]	52.82	0.75	16.24	7.42	8.38	10.08	0.13	0.72	3.32	0.14	100
[15388]	Mexican Volcanic Belts	MEXICAN VOLCANIC BELTS / TRANS MEXICAN VOLCANIC BELT / MORELOS / CERRO PELAGATOS	SIERRA CHICHINAUTZIN	19.1133	-98.9075	s_0517 [15388]	2617	46.7864	ANDESITE, BASALTIC [15388]	2500 [15388]	14000 [15388]		PLIO-QUATERNARY					VOL					WR [15388]	53.8289	0.79949	15.4636	7.20553	8.07586	10.0999	0.124478	0.870331	3.38012	0.151802	100
[3664]	Mexican Volcanic Belts	MEXICAN VOLCANIC BELTS / TRANS MEXICAN VOLCANIC BELT / MORELOS / CHICHINAUTZIN VOLCANIC FIELD - YECAHUAZAC		19.08	-99.1	s_297 [3664]	3060	50.2374	BASALT, ALKALINE [3664]				QUATERNARY [3664]					VOL					WR [3664]	52.8643	1.21608	14.8744	7.55779	7.36683	10.1508	0.130653	0.994975	4.55276	0.291457	100
[6862]	Mexican Volcanic Belts	MEXICAN VOLCANIC BELTS / TRANS MEXICAN VOLCANIC BELT / MORELOS / CHICHINAUTZIN VOLCANIC FIELD - SUCHIOOC		19.0728	-99.1047	s_B3-06 [6862]	3118	50.6892	NOT GIVEN [6862]				Holocene					VOL					WR [6862]	52.9072	1.22946	14.935	7.68949	7.91089	10.1884	0.131008	1.11861	3.58761	0.302327	100
[15388]	Mexican Volcanic Belts	MEXICAN VOLCANIC BELTS / TRANS MEXICAN VOLCANIC BELT / MORELOS / CERRO PELAGATOS	SIERRA CHICHINAUTZIN	19.1232	-98.9086	s_0516 [15388]	2721	47.5966	ANDESITE, BASALTIC [15388]	2500 [15388]	14000 [15388]		PLIO-QUATERNARY					VOL					WR [15388]	53.7576	0.800494	15.3926	7.23582	8.04542	10.2111	0.124476	0.920922	3.35985	0.1518	100
[3664]	Mexican Volcanic Belts	MEXICAN VOLCANIC BELTS / TRANS MEXICAN VOLCANIC BELT / MORELOS / CHICHINAUTZIN VOLCANIC FIELD - TUXTEPEC	CONE	19.13	-99.28	s_115 [3664]	3027	49.9803	BASALT, ALKALINE [3664]				QUATERNARY [3664]					VOL					WR [3664]	50.3989	1.0504	14.14	7.97899	9.49399	10.2313	0.1414	1.7776	4.2723	0.515099	100
[15388]	Mexican Volcanic Belts	MEXICAN VOLCANIC BELTS / TRANS MEXICAN VOLCANIC BELT / MORELOS / CERRO PELAGATOS	SIERRA CHICHINAUTZIN	19.0929	-98.9625	s_0510 [15388]	3100	50.549	ANDESITE, BASALTIC [15388]	2500 [15388]	14000 [15388]		PLIO-QUATERNARY					VOL					WR [15388]	52.9398	0.826396	15.762	7.43757	8.15311	10.2393	0.126983	0.917098	3.4366	0.161248	100
[23383]	Mexican Volcanic Belts	MEXICAN VOLCANIC BELTS / TRANS MEXICAN VOLCANIC BELT / MICHOACAN / MICHOACAN-GUANAJUATO VOLCANIC FIELD - EL ASTILLERO		19.3136	-102.377	s_TANC-1830A [23383]	2150	43.1485	ANDESITE, BASALTIC [23383]				HOLOCENE [23383]				PORPHYRITIC [23383]	VOL					WR [23383]	52.4465	0.833919	16.598	7.85693	8.07797	10.2582	0.130614	0.582739	3.07445	0.140661	100
[20283]	Mexican Volcanic Belts	MEXICAN VOLCANIC BELTS / TRANS MEXICAN VOLCANIC BELT / MICHOACAN / MICHOACAN-GUANAJUATO VOLCANIC FIELD - JORULLO	1759 TO 1774 ERUPTION	18.9672	-101.718	s_JOR-1290D [20283]	1015	34.3068	ANDESITE, BASALTIC [20283]				Holocene					VOL					WR [20283]	53.1088	0.709716	16.0136	7.18713	8.22671	10.3359	0.129948	0.739704	3.40864	0.139944	100
[3616]	Mexican Volcanic Belts	MEXICAN VOLCANIC BELTS / TRANS MEXICAN VOLCANIC BELT / JALISCO / MASCOTA VOLCANIC COMPLEX		20.535	-104.785	s_M.102 [3616]	1238	36.044	ABSAROKITE [3616]				QUATERNARY [3616]					VOL					WR [3616]	50.2628	1.00729	15.0992	7.76671	8.44497	11.8331	0.122096	1.42445	3.59165	0.447685	100			0.6	0.06
[3616]	Mexican Volcanic Belts	MEXICAN VOLCANIC BELTS / TRANS MEXICAN VOLCANIC BELT / JALISCO / MASCOTA VOLCANIC COMPLEX		20.535	-104.785	s_M.52 [3616]	1238	36.044	ABSAROKITE [3616]				QUATERNARY [3616]					VOL					WR [3616]	50.8018	1.0522	13.4641	7.52911	7.25302	13.4436	0.112371	2.80927	3.01358	0.520992	100			0.53	0.14
[3616]	Mexican Volcanic Belts	MEXICAN VOLCANIC BELTS / TRANS MEXICAN VOLCANIC BELT / JALISCO / MASCOTA VOLCANIC COMPLEX		20.535	-104.785	s_M.534 [3616]	1238	36.044	ABSAROKITE [3616]				QUATERNARY [3616]					VOL					WR [3616]	49.2711	1.19824	12.1462	8.05319	7.42498	16.8368	0.122896	1.94586	2.43744	0.563274	100			0.76	0.19
[6972]	New Hebrides Arc Vanuatu Archipelago	NEW HEBRIDES ARC - VANUATU ARCHIPELAGO / CENTRAL NEW HEBRIDES ARC / EMAU (MAO) / EMAU (MAO) / OFFSHORE SUITE		-17.48	168.489	s_AR192 [6972]	129	27.4049	BASALT [6972]				QUATERNARY					VOL					WR [6972]	47.6292	0.810537	17.1935	11.6312	12.2594	7.0922	0.212766	0.638298	2.32016	0.212766	100
[4032]	New Hebrides Arc Vanuatu Archipelago	NEW HEBRIDES ARC - VANUATU ARCHIPELAGO / BANKS ISLANDS / MOTA)		-13.851	167.694	s_MOMAC3 [4032]	114	27.2881	BASALT [4032]	500000 [4032]	500000 [4032]		PLIO-QUATERNARY					VOL					WR [4032]	49.1296	0.779514	17.372	11.3683	10.8828	7.14723	0.202471	0.587166	2.35879	0.1721	100
[12378]	New Hebrides Arc Vanuatu Archipelago	NEW HEBRIDES ARC - VANUATU ARCHIPELAGO / SOUTHERN NEW HEBRIDES ARC / LOPEVI		-16.5122	168.312	s_PV49 [12378]	60	26.8674	BASALT [12378]				QUATERNARY			1964		VOL					WR [12378]	51.1093	0.665591	17.4869	8.98548	11.6478	7.20048	0.181525	0.574829	1.99677	0.151271	100		0.01
[6972]	New Hebrides Arc Vanuatu Archipelago	NEW HEBRIDES ARC - VANUATU ARCHIPELAGO / CENTRAL NEW HEBRIDES ARC / EMAU (MAO) / EMAU (MAO) / OFFSHORE SUITE		-17.48	168.489	s_AR201 [6972]	129	27.4049	BASALT [6972]				QUATERNARY					VOL					WR [6972]	48.0251	0.789953	17.1967	11.1606	11.6974	7.22098	0.202552	1.07353	2.30909	0.324083	100
[4032]	New Hebrides Arc Vanuatu Archipelago	NEW HEBRIDES ARC - VANUATU ARCHIPELAGO / SOUTHERN NEW HEBRIDES ARC / ANATOM (ANEITYUM) / ANATOM (ANEITYUM)		-20.2	169.8	s_AYC42 [4032]	358	29.1888	BASALT [4032]		3000000		PLIO-QUATERNARY					VOL					WR [4032]	49.858	0.870087	15.8639	10.5328	12.1509	7.3148	0.202346	0.687976	2.34721	0.171994	100
[6972]	New Hebrides Arc Vanuatu Archipelago	NEW HEBRIDES ARC - VANUATU ARCHIPELAGO / CENTRAL NEW HEBRIDES ARC / PELE / PELE / OFFSHORE SUITE		-17.5	168.4	s_AR114 [6972]	20	26.5558	BASALT [6972]				QUATERNARY					VOL					WR [6972]	47.1671	0.758802	18.1505	10.2792	12.6062	7.49696	0.19223	0.627276	2.45852	0.263051	100
[3787]	New Hebrides Arc Vanuatu Archipelago	NEW HEBRIDES ARC - VANUATU ARCHIPELAGO / SOUTHERN NEW HEBRIDES ARC / ERROMANGO / MOUNT RANTOP		-18.755	169.238	s_E15 [3787]	319	28.885	BASALT [3787]				PLIOCENE [3787]					VOL					WR [3787]	49.1482	0.6549	16.0246	10.3401	13.1492	7.57228	0.245587	0.849323	1.84191	0.173958	100			0.84	1.21
[19944]	New Hebrides Arc Vanuatu Archipelago	NEW HEBRIDES ARC - VANUATU ARCHIPELAGO / SOUTHERN NEW HEBRIDES ARC / TANNA (=TANUA) / YASUR(=YASOWA)	YENKAHE CALDERA, SE TANNA, FRIENDLY BUNGALOWS	-19.52	169.42	s_BR6 [19944]	113	27.2803	ANDESITE, BASALTIC [19944]				QUATERNARY					VOL					WR [19944]	53.4961	0.756735	14.4789	9.16154	8.7075	7.83977	0.181616	2.03814	3.01685	0.322874	100
[4032][10608]	New Hebrides Arc Vanuatu Archipelago	NEW HEBRIDES ARC - VANUATU ARCHIPELAGO / BANKS ISLANDS / MOTA)		-13.851	167.694	s_MOMAC4 [4032]	114	27.2881	BASALT [4032]	500000 [4032]	500000		PLIO-QUATERNARY					VOL					WR [4032]	49.1122	0.738301	16.5561	10.4836	11.7117	7.87858	0.202274	0.697846	2.45763	0.161819	100
[4032]	New Hebrides Arc Vanuatu Archipelago	NEW HEBRIDES ARC - VANUATU ARCHIPELAGO / CENTRAL NEW HEBRIDES ARC / AOBA (=AMBAE) / AOBA (=AMBAE)		-15.38	167.83	s_AOW115 [4032]	1387	37.2047	BASALT [4032]		100000 [4032]		PLIO-QUATERNARY					VOL					WR [4032]	49.9921	0.839438	15.1604	10.3926	11.3981	7.95949	0.212388	1.28444	2.5082	0.252843	100
[4032][10608]	New Hebrides Arc Vanuatu Archipelago	NEW HEBRIDES ARC - VANUATU ARCHIPELAGO / CENTRAL NEW HEBRIDES ARC / EPI / EAST EPI		-16.74	168.269	s_EPW70 [4032]	289	28.6513	BASALT [4032]		400000 [4032]		PLIO-QUATERNARY					VOL					WR [4032]	50.6747	0.707465	15.0185	9.84875	11.9663	8.0651	0.18192	1.03088	2.30431	0.202133	100
[12378]	New Hebrides Arc Vanuatu Archipelago	NEW HEBRIDES ARC - VANUATU ARCHIPELAGO / SOUTHERN NEW HEBRIDES ARC / LOPEVI		-16.4975	168.319	s_PV15 [12378]	442	29.8432	BASALT [12378]				QUATERNARY			2003		VOL					WR [12378]	50.1556	0.672758	16.1864	9.50899	12.3506	8.12331	0.1707	0.652676	2.02832	0.150618	100		0
[6972]	New Hebrides Arc Vanuatu Archipelago	NEW HEBRIDES ARC - VANUATU ARCHIPELAGO / CENTRAL NEW HEBRIDES ARC / EFATE / MOUNT FATMALAPA / MAINLAND SUITE		-17.58	168.37	s_AR179 [6972]	428	29.7341	BASALT [6972]				QUATERNARY					VOL					WR [6972]	46.0338	0.830716	17.4653	11.5996	13.1598	8.18559	0.192483	0.486273	1.77287	0.273529	100
[12378]	New Hebrides Arc Vanuatu Archipelago	NEW HEBRIDES ARC - VANUATU ARCHIPELAGO / SOUTHERN NEW HEBRIDES ARC / LOPEVI		-16.5062	168.308	s_PV47 [12378]	53	26.8129	BASALT [12378]				QUATERNARY			1939		VOL					WR [12378]	49.8794	0.653398	15.9228	9.45919	12.7061	8.4238	0.180941	0.643345	1.99035	0.140732	100		0.04
[12378]	New Hebrides Arc Vanuatu Archipelago	NEW HEBRIDES ARC - VANUATU ARCHIPELAGO / SOUTHERN NEW HEBRIDES ARC / LOPEVI		-16.4975	168.319	s_PV17 [12378]	442	29.8432	BASALT [12378]				QUATERNARY			1964		VOL					WR [12378]	49.9699	0.652348	15.827	9.48414	12.6857	8.52067	0.170614	0.642312	1.90686	0.140506	100		0
[4032]	New Hebrides Arc Vanuatu Archipelago	NEW HEBRIDES ARC - VANUATU ARCHIPELAGO / CENTRAL NEW HEBRIDES ARC / AOBA (=AMBAE) / AOBA (=AMBAE)		-15.38	167.83	s_AOW11 [4032]	1387	37.2047	BASALT [4032]		100000 [4032]		PLIO-QUATERNARY					VOL					WR [4032]	49.9051	0.778345	14.5257	9.91412	11.655	8.75386	0.192059	1.41517	2.58775	0.272926	100
[6972]	New Hebrides Arc Vanuatu Archipelago	NEW HEBRIDES ARC - VANUATU ARCHIPELAGO / CENTRAL NEW HEBRIDES ARC / EFATE / MOUNT FATMALAPA / MAINLAND SUITE		-17.58	168.37	s_AR175 [6972]	428	29.7341	BASALT [6972]				QUATERNARY					VOL					WR [6972]	45.952	0.820752	16.3441	11.7844	13.5272	9.08907	0.192522	0.476239	1.57057	0.243186	100
[4032][10608]	New Hebrides Arc Vanuatu Archipelago	NEW HEBRIDES ARC - VANUATU ARCHIPELAGO / CENTRAL NEW HEBRIDES ARC / TONGOA / TONGOA		-16.909	168.555	s_TOW5 [4032]	235	28.2306	BASALT [4032]		2000000 [4032]		PLIO-QUATERNARY					VOL					WR [4032]	49.0682	0.637512	13.8229	10.8899	13.5193	9.42102	0.182146	0.465485	1.86194	0.13155	100
[19944]	New Hebrides Arc Vanuatu Archipelago	NEW HEBRIDES ARC - VANUATU ARCHIPELAGO / SOUTHERN NEW HEBRIDES ARC / TANNA (=TANUA) / YASUR(=YASOWA)	YENKAHE CALDERA, SE TANNA, TUKASMERA	-19.52	169.42	s_TUK-1 [19944]	113	27.2803	BASALT [19944]				QUATERNARY					VOL					WR [19944]	48.0783	0.709867	13.7004	11.8751	13.4976	9.58321	0.21296	0.649021	1.58199	0.111551	100
[4032][10608]	New Hebrides Arc Vanuatu Archipelago	NEW HEBRIDES ARC - VANUATU ARCHIPELAGO / CENTRAL NEW HEBRIDES ARC / AOBA (=AMBAE) / AOBA (=AMBAE)		-15.38	167.83	s_AOW1 [4032]	1387	37.2047	BASALT [4032]	100000 [4032]	100000 [4032]		PLIO-QUATERNARY					VOL					WR [4032]	49.0727	1.09163	13.7161	10.0317	12.2	9.98638	0.192046	1.14217	2.28433	0.283015	100
[19944]	New Hebrides Arc Vanuatu Archipelago	NEW HEBRIDES ARC - VANUATU ARCHIPELAGO / SOUTHERN NEW HEBRIDES ARC / TANNA (=TANUA) / YASUR(=YASOWA)	YENKAHE CALDERA, SE TANNA, TUKASMERA	-19.52	169.42	s_TUK-3 [19944]	113	27.2803	BASALT [19944]				QUATERNARY					VOL					WR [19944]	47.6538	0.790514	14.4522	10.8037	13.6921	10.3274	0.192561	0.435796	1.56076	0.0912131	100
[4032]	New Hebrides Arc Vanuatu Archipelago	NEW HEBRIDES ARC - VANUATU ARCHIPELAGO / CENTRAL NEW HEBRIDES ARC / AOBA (=AMBAE) / AOBA (=AMBAE)		-15.38	167.83	s_AOW130 [4032]	1387	37.2047	BASALT [4032]		100000 [4032]		PLIO-QUATERNARY					VOL					WR [4032]	49.4895	0.717826	13.4971	10.0797	11.4347	10.7067	0.181984	1.26378	2.41634	0.212315	100
[4032][10608]	New Hebrides Arc Vanuatu Archipelago	NEW HEBRIDES ARC - VANUATU ARCHIPELAGO / SOUTHERN NEW HEBRIDES ARC / FUTUNA		-19.535	170.215	s_FMAC18 [4032]	582	30.9338	BASALT [4032]	1800000 [4032]	3500000		PLIO-QUATERNARY					VOL					WR [4032]	51.8079	1.00892	14.367	8.007	10.5533	10.755	0.151337	0.746598	2.40122	0.201783	100
[4032][10608]	New Hebrides Arc Vanuatu Archipelago	NEW HEBRIDES ARC - VANUATU ARCHIPELAGO / BANKS ISLANDS / MERE LAVA		-14.461	168.04	s_MLM7 [4032]	549	30.6767	BASALT [4032]		10000 [4032]		PLIO-QUATERNARY					VOL					WR [4032]	51.849	0.504662	12.7478	8.37351	12.4753	11.7586	0.161492	0.353264	1.69567	0.080746	100
[4033][5603]	New Hebrides Arc Vanuatu Archipelago	NEW HEBRIDES ARC - VANUATU ARCHIPELAGO / CENTRAL NEW HEBRIDES ARC / AOBA (=AMBAE) / AOBA (=AMBAE)		-15.38	167.83	s_68611 [4033]	1387	37.2047	BASALT [4033] / NOT GIVEN [5603]		10000 [4033]		PLIO-QUATERNARY					VOL					WR [4033]	48.6319	0.712033	12.8064	10.3347	12.0639	12.2877	0.193266	0.9053	1.8818	0.183094	100
[5603]	New Hebrides Arc Vanuatu Archipelago	NEW HEBRIDES ARC - VANUATU ARCHIPELAGO / BANKS ISLANDS / GAUA (SANTA MARIA) / GAUA (SANTA MARIA)		-14.282	167.516	s_G20 [5603]	527	30.5053	NOT GIVEN [5603]				QUATERNARY					VOL					WR [5603]	47.1228	0.752338	11.5087	10.5836	11.9357	15.0061	0.264335	0.610004	2.06385	0.152501	100
[24621]	Ryukyu Arc	RYUKYU ARC / RYUKYU ARC / KYUSHU / YONEMARU	KAMO VOLCANIC FIELD	31.78	130.57	s_LY5 [24621]	84	27.0544	BASALT [24621]				QUATERNARY					VOL					WR [24621]	47.5925	1.07451	17.6483	12.3061	12.0426	7.00456	0.212874	0.344653	1.67258	0.101368	100
[24621]	Ryukyu Arc	RYUKYU ARC / RYUKYU ARC / KYUSHU / YONEMARU	KAMO VOLCANIC FIELD	31.78	130.57	s_UY1 [24621]	84	27.0544	BASALT [24621]				QUATERNARY					VOL					WR [24621]	46.8307	0.901175	18.8943	11.2596	12.6569	7.06764	0.202511	0.36452	1.73147	0.09113	100
[24037]	Ryukyu Arc	RYUKYU ARC / RYUKYU ARC / KYUSHU / AIRA	KOKUBU SHIKINE, KIRISHIMA CITY	31.7032	130.805	s_180124A [24037]	49	26.7817	ANDESITE, ORTHOPYROXENE-CLINOPYROXENE [24037]				QUATERNARY [24037]					VOL					WR [24037]	53.9989	1.29812	14.5511	8.14232	9.42327	7.93017	0.147491	1.40723	2.8094	0.291952	100
[2596]	Solomon Island Arc	SOLOMON ISLAND ARC / SOLOMON ISLAND ARC - WESTERN PROVINCE / NEW GEORGIA ISLANDS - KOLO CALDERA		-8.42	157.79	s_R44687 [2596]	636	31.3544	PICRITE [2596]				PLIO-QUATERNARY					VOL					WR [2596]	50.0409	0.576228	12.9399	10.2095	11.1202	10.918	0.252732	1.46584	2.17349	0.303278	100
[2596]	Solomon Island Arc	SOLOMON ISLAND ARC / SOLOMON ISLAND ARC - WESTERN PROVINCE / NEW GEORGIA ISLANDS - KOLO CALDERA		-8.42	157.79	s_R44682 [2596]	636	31.3544	PICRITE [2596]				PLIO-QUATERNARY					VOL					WR [2596]	49.4184	0.50842	11.3886	12.2569	10.5751	12.2021	0.183031	1.24054	1.91166	0.31522	100
[2596]	Solomon Island Arc	SOLOMON ISLAND ARC / SOLOMON ISLAND ARC - WESTERN PROVINCE / NEW GEORGIA ISLANDS - KOLO CALDERA		-8.42	157.79	s_R44688 [2596]	636	31.3544	PICRITE [2596]				PLIO-QUATERNARY					VOL					WR [2596]	49.1744	0.47752	9.9568	10.4294	10.0584	15.9512	0.2032	1.3716	2.09296	0.28448	100
[4588]	Sunda Arc	SUNDA ARC / SUNDA ARC / JAVA / LAMONGAN	GUNUNG CILIK	-8	113.34	s_GCK2961 [4588]	603	31.0974	NOT GIVEN [4588]				QUATERNARY					VOL					WR [4588]	45.5509	1.22521	17.7399	12.2119	12.4833	6.99547	0.193983	1.19606	2.22126	0.181922	100
[15822]	Sunda Arc	SUNDA ARC / SUNDA ARC / SUMBAWA / TAMBORA	PRE-AD 1815 LAVA FLOW	-8.27	117.98	s_T06 [15822]	2028	42.1981	BASALT [15822]				PLIO-QUATERNARY					VOL					WR [15822]	52.0322	0.774648	15.4829	9.76861	11.2274	7.07243	0.191147	0.855131	2.43461	0.160966	100
[5646]	Sunda Arc	SUNDA ARC / SUNDA ARC / JAVA / SLAMET	OLD SLAMET CONE	-7.233	109.166	s_S30 [5646]	2023	42.1592	BASALT [5646]				QUATERNARY [5646]					VOL					WR [5646]	50.6811	1.15184	17.0373	9.46514	10.3766	7.08133	0.180288	0.991587	3.03486	0	100
[4787]	Sunda Arc	SUNDA ARC / SUNDA ARC / JAVA / GALUNGGUNG	WEST JAVA	-7.25	108.066	s_13337 [4787]	1613	38.9653	NOT GIVEN [4787]				QUATERNARY [4787]	18	5	1982		VOL					WR [4787]	52.6889	0.817274	17.2435	8.04157	10.1604	7.17385	0.141257	0.565029	3.03703	0.131167	100
[4588]	Sunda Arc	SUNDA ARC / SUNDA ARC / JAVA / LAMONGAN	GUNUNG KENDENG, SPATTER CONE	-8	113.34	s_GKG136 [4588]	603	31.0974	NOT GIVEN [4588]				QUATERNARY					VOL					WR [4588]	45.8997	1.22852	17.5213	11.9003	12.9941	7.2921	0.190405	0.871001	1.95469	0.147868	100
[4588]	Sunda Arc	SUNDA ARC / SUNDA ARC / JAVA / LAMONGAN	GUNUNG MEJA, CONE	-8	113.34	s_GMA5070 [4588]	603	31.0974	NOT GIVEN [4588]				QUATERNARY					VOL					WR [4588]	45.4426	1.26017	17.6161	12.0972	12.8438	7.43588	0.188672	0.887866	2.06833	0.159412	100
[5646]	Sunda Arc	SUNDA ARC / SUNDA ARC / JAVA / SLAMET	NEW SLAMET CONE	-7.233	109.166	s_S222 [5646]	2023	42.1592	BASALT [5646]				QUATERNARY [5646]					VOL					WR [5646]	50.6313	1.2024	16.0521	9.96994	10.3707	7.50501	0.190381	1.11222	2.96593	0	100
[5646][3092]	Sunda Arc	SUNDA ARC / SUNDA ARC / JAVA / SLAMET	OLD SLAMET CONE	-7.233	109.166	s_S154 [5646]	2023	42.1592	BASALT [5646]				QUATERNARY [5646]					VOL					WR [5646]	50.1601	1.11089	16.3731	10.1381	10.4684	7.69616	0.190152	0.890713	2.97238	0	100
[5646][3092]	Sunda Arc	SUNDA ARC / SUNDA ARC / JAVA / SLAMET	NEW SLAMET CONE	-7.233	109.166	s_S108 [5646]	2023	42.1592	BASALT [5646]				QUATERNARY [5646]					VOL					WR [5646]	50.8113	1.252	15.7652	10.1262	10.4768	7.71234	0.190304	1.0016	2.66426	0	100
[22262]	Sunda Arc	SUNDA ARC / ANDAMAN ARC / BURMA (MYANMAR) / MOUNT POPA		20.9533	95.2387	s_PO-PF2 [22262]	665	31.5803	ANDESITE, BASALTIC [22262]				HOLOCENE					VOL					WR [22262]	53.2252	0.729934	15.8086	7.49933	11.119	7.8093	0.129988	1.0999	2.39978	0.178984	100
[15822]	Sunda Arc	SUNDA ARC / SUNDA ARC / SUMBAWA / TAMBORA	PRE-AD 1815 LAVA FLOW	-8.27	117.98	s_T04 [15822]	2028	42.1981	BASALT [15822]				PLIO-QUATERNARY					VOL					WR [15822]	52.3925	0.896545	16.3494	7.73648	9.50942	8.86471	0.151103	0.906618	2.97169	0.221618	100
[22262]	Sunda Arc	SUNDA ARC / ANDAMAN ARC / BURMA (MYANMAR) / MONYWA	MONYWA AREA	22.2299	94.9475	s_MO-D3 [22262]	124	27.366	BASALT [22262]				HOLOCENE					VOL					WR [22262]	48.52	0.999	16.44	9.04	11.81	8.88	0.178	0.95	2.91	0.273	100
[4787]	Sunda Arc	SUNDA ARC / SUNDA ARC / JAVA / GALUNGGUNG	WEST JAVA	-7.25	108.066	s_13338 [4787]	1613	38.9653	NOT GIVEN [4787]				QUATERNARY [4787]	3	6	1982		VOL					WR [4787]	50.9741	0.80751	16.2814	8.47885	10.8408	9.24599	0.151408	0.464318	2.64459	0.111033	100
[22262]	Sunda Arc	SUNDA ARC / ANDAMAN ARC / BURMA (MYANMAR) / MONYWA	MONYWA AREA	22.2283	94.9993	s_MO-C4 [22262]	96	27.1478	BASALT [22262]				HOLOCENE					VOL					WR [22262]	47.3667	0.979931	16.6588	8.98937	13.2691	9.48934	0.165988	0.629956	2.20985	0.240983	100
[4787]	Sunda Arc	SUNDA ARC / SUNDA ARC / JAVA / GALUNGGUNG	WEST JAVA	-7.25	108.066	s_13353 [4787]	1613	38.9653	NOT GIVEN [4787]				QUATERNARY [4787]	7	1	1982		VOL					WR [4787]	49.6869	0.828116	16.3704	8.96789	11.2906	9.98788	0.171682	0.363563	2.23187	0.10099	100
[4588]	Sunda Arc	SUNDA ARC / SUNDA ARC / JAVA / LAMONGAN	RANU AIR, W CRATER FLOOR	-8	113.34	s_RAR2861 [4588]	603	31.0974	NOT GIVEN [4588]				QUATERNARY					VOL					WR [4588]	46.8725	0.881809	16.441	10.8469	12.3835	10.0233	0.193837	0.361562	1.8982	0.0974209	100
[22262]	Sunda Arc	SUNDA ARC / ANDAMAN ARC / BURMA (MYANMAR) / MONYWA	MONYWA AREA	22.2602	94.95	s_MO-C5 [22262]	133	27.4361	BASALT [22262]				HOLOCENE					VOL					WR [22262]	48.3329	0.856051	16.561	8.86053	11.4907	10.0406	0.17201	0.720043	2.80017	0.16601	100
[4588]	Sunda Arc	SUNDA ARC / SUNDA ARC / JAVA / LAMONGAN	RANU AIR, W CRATER FLOOR	-8	113.34	s_RAR2863 [4588]	603	31.0974	NOT GIVEN [4588]				QUATERNARY					VOL					WR [4588]	46.0712	1.02325	15.5646	11.8893	12.6826	10.4032	0.196817	0.311292	1.76733	0.0903751	100
[4787]	Sunda Arc	SUNDA ARC / SUNDA ARC / JAVA / GALUNGGUNG	WEST JAVA	-7.25	108.066	s_13350 [4787]	1613	38.9653	NOT GIVEN [4787]				QUATERNARY [4787]		12	1982		VOL					WR [4787]	49.3234	0.797819	16.118	8.8265	11.6845	10.412	0.161584	0.333266	2.25207	0.0908907	100
[4787]	Sunda Arc	SUNDA ARC / SUNDA ARC / JAVA / GALUNGGUNG	WEST JAVA	-7.25	108.066	s_13347 [4787]	1613	38.9653	NOT GIVEN [4787]				QUATERNARY [4787]	25	9	1982		VOL					WR [4787]	49.379	0.817934	15.9144	8.94678	11.3703	10.8149	0.151469	0.34333	2.17106	0.0908816	100
[4787]	Sunda Arc	SUNDA ARC / SUNDA ARC / JAVA / GALUNGGUNG	WEST JAVA	-7.25	108.066	s_13351 [4787]	1613	38.9653	NOT GIVEN [4787]				QUATERNARY [4787]	3	12	1982		VOL					WR [4787]	49.2325	0.797819	15.9766	8.99818	11.3108	10.8867	0.151485	0.343365	2.21167	0.0908907	100
[4588]	Sunda Arc	SUNDA ARC / SUNDA ARC / JAVA / LAMONGAN	RANU AGUNG, W END OF MAAR	-8	113.34	s_RAG1962 [4588]	603	31.0974	NOT GIVEN [4588]				QUATERNARY					VOL					WR [4588]	45.9728	0.954914	15.7742	11.6242	12.289	11.0299	0.194408	0.312261	1.76276	0.0856199	100
[4787]	Sunda Arc	SUNDA ARC / SUNDA ARC / JAVA / GALUNGGUNG	WEST JAVA	-7.25	108.066	s_13344 [4787]	1613	38.9653	NOT GIVEN [4787]				QUATERNARY [4787]	16	9	1982		VOL					WR [4787]	49.3082	0.807999	15.7257	8.93849	11.3827	11.0595	0.1616	0.3535	2.1816	0.0807999	100
[22262]	Sunda Arc	SUNDA ARC / ANDAMAN ARC / BURMA (MYANMAR) / MONYWA	MONYWA AREA	22.2477	95.0903	s_MO-D1 [22262]	83	27.0466	BASALT [22262]				HOLOCENE					VOL					WR [22262]	48.0534	0.879062	16.2111	8.93063	11.1008	11.3808	0.173012	0.72005	2.39017	0.161011	100
[21408]	Tonga Arc	TONGA ARC / TONGA ISLANDS / ATA		-22.34	-176.205	s_A 8 [21408]	65	26.9063	BASALT [21408]				QUATERNARY					VOL					WR [21408]	50.9618	0.610687	16.8855	9.85242	12.3868	7.06361	0.183206	0.193384	1.75064	0.111959	100
[21408]	Tonga Arc	TONGA ARC / TONGA ISLANDS / TAFAHI		-15.85	-173.749	s_TAF 20† [21408]	135	27.4517	BASALT [21408]				QUATERNARY					VOL					WR [21408]	51.9434	0.3663	16.4428	10.0122	12.444	7.18356	0.18315	0.1628	1.221	0.0407	100
[21408]	Tonga Arc	TONGA ARC / TONGA ISLANDS / ATA		-22.34	-176.205	s_A 6 [21408]	65	26.9063	BASALT [21408]				QUATERNARY					VOL					WR [21408]	52.1063	0.64653	15.244	10.0515	12.1729	7.38458	0.191939	0.404081	1.67694	0.121224	100
[2495][3591][13277]	Tonga Arc	TONGA ARC / TONGA ISLANDS / ATA		-22.34	-176.205	s_482-8-11 [2495]	65	26.9063	BASALT [2495]		10000 [2495]		QUATERNARY				PORPHYRITIC INTERSERTAL [3591]	VOL					WR [2495]	50.6584	0.683486	15.881	10.3126	12.4636	7.46809	0.201025	0.462358	1.73887	0.130666	100			0.42	0.11
[21408]	Tonga Arc	TONGA ARC / TONGA ISLANDS / TAFAHI		-15.85	-173.749	s_TAF 06† [21408]	135	27.4517	BASALT [21408]				QUATERNARY					VOL					WR [21408]	52.9681	0.417473	15.2938	10.3961	11.9234	7.50433	0.193463	0.173098	1.07932	0.0509113	100
[21408]	Tonga Arc	TONGA ARC / TONGA ISLANDS / TAFAHI		-15.85	-173.749	s_TAF 18† [21408]	135	27.4517	BASALT [21408]				QUATERNARY					VOL					WR [21408]	52.4268	0.33438	15.9388	9.70716	12.3113	7.67048	0.182389	0.192522	1.18553	0.0506637	100
[21408]	Tonga Arc	TONGA ARC / TONGA ISLANDS / TAFAHI		-15.85	-173.749	s_TAF 30† [21408]	135	27.4517	BASALT [21408]				QUATERNARY					VOL					WR [21408]	52.03	0.380306	15.0478	10.7514	11.7792	8.29479	0.205571	0.154178	1.31565	0.0411142	100
[truncated: 115 more columns]

## Sheet: 10x10x650m spatial avg
Median?	Arc	Location	Median Elevation	Median crustal thickness (CT)	CT Std Dev	CT RMSE		Median SIO2(WT%)	Std Dev	Median MGO(WT%)	Std Dev	Median (Na2O+K2O)	Std Dev		Median 10000*Zn/Fe	Std Dev	Median Dy/Yb	Std Dev	Median Th/Nb	Std Dev	Median Ba/Nb	Std Dev	Median CU(PPM)	Std Dev	Fo	CaTs	Qz
Median	Aegean Arc	AEGEAN ARC / SOUTH AEGEAN VOLCANIC ARC / AEGINA	20	26.5558	0	2.5		52.0953	1.30527	7.63261	0.699345	4.70766	0.545046		10.1632	1.70185			1.0294	0.305785	85.4982	17.3811	80.4917	30.1673	24.1167	55.4249	20.4584
Single point	Aegean Arc	AEGEAN ARC / SOUTH AEGEAN VOLCANIC ARC / NISYROS / NISYROS	209	28.0281	0.12	2.50288		47.1713	0.76	7.54983	0.58	0.28186	0.27		13.9145	0.8			0.587949	0.1	6.92308	6.92			2.48908	80.3827	17.1282
Single point	Aegean Arc	AEGEAN ARC / SOUTH AEGEAN VOLCANIC ARC / POROS	165	27.6853	0.12	2.50288		53.7501	0.76	7.00539	0.58	3.91118	0.27		10.798	0.8	1.80869	0.07	1.36101	0.1	62.3169	12.7	57.4412	8.55	22.0349	53.0261	24.939
Median	Aegean Arc	AEGEAN ARC / SOUTH AEGEAN VOLCANIC ARC / SANTORINI	143	27.514	0	2.5		52.1675	1.56112	8.01409	0.626119	3.26549	0.478118		11.1686	0.315983					36.9167	9.07454	55.34	11.5102	28.1635	49.09	22.7465
Single point	Aegean Arc	AEGEAN ARC / WEST AEGEAN VOLCANIC ARC / METHANA PENINSULA / METHANA	169	27.7165	0.12	2.50288		52.3438	0.76	7.10591	0.58	3.79301	0.27		9.58904	0.8	1.69916	0.07	1.17502	0.1	69.5176	12.7	27.59	8.55	22.639	54.9597	22.4013
Single point	Aeolian Arc	AEOLIAN ARC / ITALY / VULCANO / LA FOSSA DI VULCANO	39	26.7038	0.12	2.50288		49.1691	0.76	8.82002	0.58	4.76484	0.27		9.43409	0.8							133	8.55	29.5344	62.0385	8.42715
Median	Aleutian Arc	ALEUTIAN ARC / ALASKA PENINSULA / UPPER ALASKA PENINSULA	56	26.8362	0	2.5		48.4368	0.600951	9.27577	0.227709	3.88946	0.233207		10.3815	1.76376	1.70167	0.167349	0.311282	0.00746927	53.4066	8.21181	62.5	2.12132	32.778	53.0504	14.1716
Median	Aleutian Arc	ALEUTIAN ARC / ALASKA PENINSULA / UPPER ALASKA PENINSULA / KATMAI GROUP	327.5	28.9512	0.468211	2.54347		51.8903	0.372644	7.63166	0.269278	2.75644	0.0921112		10.3471	1.13791			0.478333	0.181491	82.5	38.4195			27.9908	47.74	24.2692
Median	Aleutian Arc	ALEUTIAN ARC / ALASKA PENINSULA / UPPER ALASKA PENINSULA / KATMAI GROUP	1035	34.4626	2.50273	3.53746		52.1185	1.36498	8.76506	2.94724	2.91194	0.551464		12.4806	1.04163			0.228	0.160582	34	25.3246			28.5652	47.6661	23.7687
Median	Aleutian Arc	ALEUTIAN ARC / ALASKA PENINSULA / UPPER ALASKA PENINSULA / SOUTHWEST TRIDENT	600	31.074	0	2.5		56.0122	1.21305	8.84954	0.494324	4.10981	0.466958		12.3961	1.46974	1.64395	0.0025336	0.74083	0.0156306	137.012	2.68773	28	14.1421	30.8983	42.1589	26.9427
Single point	Aleutian Arc	ALEUTIAN ARC / CENTRAL ALEUTIAN ARC / GREAT SITKIN / GREAT SITKIN	7	26.4545	0.12	2.50288		48.835	0.76	10.6312	0.58	4.12012	0.27		9.07264	0.8	1.8556	0.07	0.264467	0.1	409.024	12.7	107.656	8.55	36.8373	48.1735	14.9892
Single point	Aleutian Arc	ALEUTIAN ARC / CENTRAL ALEUTIAN ARC / KASATOCHI / KASATOCHI	72	26.9609	0.12	2.50288		49.6258	0.76	8.86934	0.58	3.03398	0.27		8.50936	0.8	1.66667	0.07	0.743448	0.1	156.552	12.7	109	8.55	29.368	53.4807	17.1513
Single point	Aleutian Arc	ALEUTIAN ARC / CENTRAL ALEUTIAN ARC / RAT ISLANDS / KISKA	121	27.3426	0.12	2.50288		49.919	0.76	10.8365	0.58	3.08892	0.27		10.5272	0.8	1.87143	0.07	0.358475	0.1	114.407	12.7	80	8.55	35.6781	46.7986	17.5233
Single point	Aleutian Arc	ALEUTIAN ARC / CENTRAL ALEUTIAN ARC / SEGUAM / SEGUAM	818	32.7722	0.12	2.50288		51.4072	0.76	7.02595	0.58	2.84431	0.27		6.8536	0.8	1.62963	0.07	0.842105	0.1	184.211	12.7	98	8.55	26.6292	49.7655	23.6053
Median	Aleutian Arc	ALEUTIAN ARC / CENTRAL ALEUTIAN ARC / TANAGA	513	30.3963	0	2.5		48.9394	1.52739	7.85583	0.331364	3.27385	0.267261		9.56508	0.60502	2.08437	0.113649	1.76838	0.378152	258.028	29.5873	111.45	17.3425	29.1881	53.853	16.9589
Single point	Aleutian Arc	ALEUTIAN ARC / SECOND ALEUTIAN ARC / UMNAK	38	26.696	0.12	2.50288		48.2776	0.76	12.7348	0.58	2.35011	0.27		11.1326	0.8	1.71533	0.07	0.801198	0.1	125.749	12.7	48	8.55	40.4007	43.4362	16.163
Single point	Aleutian Arc	ALEUTIAN ARC / SECOND ALEUTIAN ARC / UNALASKA / MAKUSHIN	711	31.9387	0.12	2.50288		50.9198	0.76	7.05859	0.58	3.74925	0.27		10.6991	0.8	1.7205	0.07	0.816384	0.1	129.944	12.7	102	8.55	25.1527	55.6682	19.1792
Median	Andean Arc	ANDEAN ARC / CENTRAL ANDEAN VOLCANIC ZONE	3812	56.0955	0	2.5		52.5772	1.47059	8.31102	0.759828	5.3567	0.0129502		13.8478	0.769892	2.51177	0.0619251	0.506335	0.00457214	34.0132	0.39448	50	5.65685	25.8021	56.9607	17.2371
Single point	Andean Arc	ANDEAN ARC / CENTRAL ANDEAN VOLCANIC ZONE	3030	50.0037	0.12	2.50288		52.4949	0.76	7.15886	0.58	5.47862	0.27		13.8775	0.8	2.35821	0.07	0.239477	0.1	19.7793	12.7	47	8.55	24.4173	57.3278	18.2549
Single point	Andean Arc	ANDEAN ARC / CENTRAL ANDEAN VOLCANIC ZONE	3550	54.0545	0.12	2.50288		52.5287	0.76	8.16236	0.58	4.56727	0.27		13.9755	0.8	2.31892	0.07	0.392031	0.1	35.6041	12.7	52	8.55	27.6036	52.2172	20.1792
Single point	Andean Arc	ANDEAN ARC / CENTRAL ANDEAN VOLCANIC ZONE	4028	57.7781	0.12	2.50288		48.3127	0.76	10.4696	0.58	4.28949	0.27		12.5462	0.8	2.6087	0.07	0.377652	0.1	34.2291	12.7	56	8.55	34.6819	53.4336	11.8844
Median	Andean Arc	ANDEAN ARC / CENTRAL ANDEAN VOLCANIC ZONE	3689	55.1373	0.0771171	2.50119		53.0476	1.8556	8.63127	0.77581	4.47989	0.675476		13.9053	1.12043	1.93112	0.172637	0.307	0.0749533	40.2786	5.76797	34.5	13.435	29.6313	49.0491	21.3195
Median	Andean Arc	ANDEAN ARC / CENTRAL ANDEAN VOLCANIC ZONE / ARGENTINA	3143.5	50.8879	0.192793	2.50742		52.5814	0.417622	8.60457	0.791829	4.92166	0.0206733		12.8808	0.0709674	2.30014	0.0445307	0.285602	0.00173483	20.4459	1.29346	55	8.55	27.9263	52.5031	19.5705
Single point	Andean Arc	ANDEAN ARC / CENTRAL ANDEAN VOLCANIC ZONE / ARGENTINA	3861	56.4772	0.12	2.50288		54.2488	0.76	9.48334	0.58	4.74167	0.27		12.9629	0.8	1.95939	0.07	0.291525	0.1	22.2599	12.7			30.0166	47.5736	22.4098
Single point	Andean Arc	ANDEAN ARC / CENTRAL ANDEAN VOLCANIC ZONE / ARGENTINA	3733	55.4801	0.12	2.50288		54.5325	0.76	7.35933	0.58	4.73974	0.27		12.6266	0.8	2.11429	0.07	0.374046	0.1	24.3511	12.7			25.7333	49.6733	24.5934
Single point	Andean Arc	ANDEAN ARC / CENTRAL ANDEAN VOLCANIC ZONE / ARGENTINA	4055	57.9884	0.12	2.50288		57.1278	0.76	8.06149	0.58	5.2615	0.27		14.8347	0.8	2.14835	0.07	0.423474	0.1	20.5164	12.7			25.8547	46.8014	27.3439
Median	Andean Arc	ANDEAN ARC / CENTRAL ANDEAN VOLCANIC ZONE / ARGENTINA (GERONIMO)	4611	62.3197	1.80674	3.08453		55.0241	1.34738	7.3607	0.303651	6.97841	0.248324		17.6666	0.117959			0.530075	0.143548	43.4248	12.7226	27	8.48528	23.485	55.4024	21.1126
Single point	Andean Arc	ANDEAN ARC / CENTRAL ANDEAN VOLCANIC ZONE / ARGENTINA / EL SALADILLO	3570	54.2103	0.12	2.50288		55.758	0.76	7.93329	0.58	6.81895	0.27		13.0569	0.8	2.44944	0.07	0.161011	0.1	20.1383	12.7	119.89	8.55	24.5893	53.2896	22.1211
Median	Andean Arc	ANDEAN ARC / CENTRAL ANDEAN VOLCANIC ZONE / ARGENTINA / LOS GEMELOS	3003	49.7934	1.67561	3.0096		54.1551	0.507002	7.69438	0.757912	7.11578	0.655949		13.0681	4.48882	2.55497	0.162381	0.313398	0.0955603	27.2035	13.8935	37.23	3.42842	24.1835	57.7442	18.0723
Single point	Andean Arc	ANDEAN ARC / CENTRAL ANDEAN VOLCANIC ZONE / ARGENTINA / SALAR DE ANTOFALLA	3340	52.4186	0.12	2.50288		53.5678	0.76	7.12185	0.58	5.57228	0.27		12.4908	0.8	2.13542	0.07	0.24619	0.1	19.9048	12.7			23.9505	56.2502	19.7993
Median	Andean Arc	ANDEAN ARC / CENTRAL ANDEAN VOLCANIC ZONE / BOLIVIA	3688	55.1295	0	2.5		52.6973	0.524987	7.19793	0.210589	5.75268	0.18603		14.6299	0.383265	2.25745	0.0139681	0.235602	0.00268439	27.952	0.329819	50.5	6.36396	24.1323	57.7284	18.1393
Median	Andean Arc	ANDEAN ARC / CENTRAL ANDEAN VOLCANIC ZONE / BOLIVIA	3691	55.1529	0.0330502	2.50022		53.5175	1.01229	7.45639	0.303391	5.39265	0.204569		15.5703	1.38023	2.3913	0.0478236	0.309087	0.00436562	35.1478	3.4679	45.5	2.12132	25.7238	53.1362	21.14
Single point	Andean Arc	ANDEAN ARC / CENTRAL ANDEAN VOLCANIC ZONE / BOLIVIA	3756	55.6592	0.12	2.50288		53.418	0.76	7.91042	0.58	5.87487	0.27		18.292	0.8	2.95402	0.07	0.11875	0.1	53.375	12.7	45	8.55	26.6802	54.5859	18.7339
Median	Andean Arc	ANDEAN ARC / CENTRAL ANDEAN VOLCANIC ZONE / CHILE / CERRO OVERO MAAR	4970	65.1163	0	2.5		54.4232	0.981256	7.46913	0.218745	4.56521	0.071887		13.1463	0.323261	1.886	0.0214047	0.398885	0.037283	48.882	1.21266	56.7538	5.91085	26.0346	50.296	23.6694
Single point	Andean Arc	ANDEAN ARC / CENTRAL ANDEAN VOLCANIC ZONE / CHILE / EL NEGRILLAR	4056	57.9962	0.12	2.50288		55.0263	0.76	7.78273	0.58	4.27645	0.27		10.8459	0.8	1.9	0.07	0.944444	0.1	98.8889	12.7	69	8.55	25.3994	49.676	24.9246
Median	Andean Arc	ANDEAN ARC / CENTRAL ANDEAN VOLCANIC ZONE / CHILE / EL PAIS LAVA FLOW FIELD	3061	50.2452	0	2.5		56.1038	0.243687	7.10065	0.137554	4.34379	0.196816		14.7745	0.627088			0.5	0	53.3125	3.09359	56.5	3.53553	25.4248	47.2014	27.3738
Median	Andean Arc	ANDEAN ARC / NORTHERN ANDEAN VOLCANIC ZONE / COLOMBIA / PIJAOS VOLCANIC FIELD	584	30.9494	0	2.5		53.1627	0.670828	10.6069	0.424441	4.81811	0.249102		16.8845	0.8434			0.875	0.172301	180.312	23.7814	47	3.26599	32.4121	48.5041	19.0838
Single point	Andean Arc	ANDEAN ARC / NORTHERN ANDEAN VOLCANIC ZONE / ECUADOR / ALMAS SANTAS	3519	53.813	0.12	2.50288		53.8889	0.76	8.08081	0.58	3.91919	0.27		12.9157	0.8	2.03676	0.07	0.262357	0.1	109.354	12.7	40.08	8.55	28.0425	48.5462	23.4113
Single point	Andean Arc	ANDEAN ARC / NORTHERN ANDEAN VOLCANIC ZONE / ECUADOR / CHACHIMBIRO	1510	38.1629	0.12	2.50288		45.4997	0.76	7.73363	0.58	1.58119	0.27		8.05488	0.8	1.94231	0.07	0.889262	0.1	205.48	12.7	24.05	8.55	31.4404	50.5274	18.0322
Single point	Andean Arc	ANDEAN ARC / NORTHERN ANDEAN VOLCANIC ZONE / ECUADOR / COTACACHI	4467	61.1979	0.12	2.50288		55.1748	0.76	7.93107	0.58	3.64809	0.27		12.5294	0.8	1.71523	0.07	0.411255	0.1	172.814	12.7	52.57	8.55	27.0637	46.3815	26.5548
Single point	Andean Arc	ANDEAN ARC / NORTHERN ANDEAN VOLCANIC ZONE / ECUADOR / LICTO	3106	50.5957	0.12	2.50288		53.4575	0.76	7.99838	0.58	4.69778	0.27		14.0534	0.8	2.23438	0.07	0.385366	0.1	91.3724	12.7	57.49	8.55	27.1788	51.7312	21.0901
Single point	Andean Arc	ANDEAN ARC / NORTHERN ANDEAN VOLCANIC ZONE / ECUADOR / SANGAY	4594	62.1873	0.12	2.50288		50.2788	0.76	11.1201	0.58	4.66295	0.27		15.2664	0.8	2.21538	0.07	0.336182	0.1	68.359	12.7	145.72	8.55	35.5354	50.9283	13.5363
Single point	Andean Arc	ANDEAN ARC / NORTHERN ANDEAN VOLCANIC ZONE / ECUADOR / YANAURCU	3848	56.3759	0.12	2.50288		49.6534	0.76	8.23669	0.58	2.0186	0.27		15.2853	0.8	2.13667	0.07	0.487548	0.1	134.578	12.7	47.3977	8.55	33.2704	44.6682	22.0614
Median	Andean Arc	ANDEAN ARC / SOUTHERN ANDEAN VOLCANIC ZONE / CHILE	945	33.7615	1.49781	2.91435		51.0376	0.50119	7.39487	0.395721	3.91728	0.109853		11.1713	0.784744	1.83772	0.0959554	0.683333	0.168222	84.1667	12.4019	78.8	17.368	27.4052	52.7777	19.8171
Single point	Andean Arc	ANDEAN ARC / SOUTHERN ANDEAN VOLCANIC ZONE / CHILE / ANTUCO	2597	46.6306	0.12	2.50288		51.4355	0.76	7.54145	0.58	4.16498	0.27		11.9168	0.8	1.85882	0.07	0.333333	0.1	38.8333	12.7	74	8.55	27.5953	52.6411	19.7635
Median	Andean Arc	ANDEAN ARC / SOUTHERN ANDEAN VOLCANIC ZONE / CHILE / APAGADO	339	29.0408	0	2.5		49.609	0.337833	14.5165	1.06103	2.41588	0.0309575		11.1849	0.218459					35.9673	11.0906	68	7.07107	43.5747	38.6595	17.7659
Median	Andean Arc	ANDEAN ARC / SOUTHERN ANDEAN VOLCANIC ZONE / CHILE / APAGADO	853	33.0449	0	2.5		50.8186	0.527611	12.2512	0.201537	2.7151	0.0450054		11.7529	0.103347	1.82353	0.07	0.47619	0.1	36.7017	10.7254	54.5	6.36396	37.9444	42.0875	19.9681
Single point	Andean Arc	ANDEAN ARC / SOUTHERN ANDEAN VOLCANIC ZONE / CHILE / CARRAN-LOS VENADOS VOLCANIC FIELD	224	28.145	0.12	2.50288		50.942	0.76	7.75138	0.58	4.12656	0.27		6.34397	0.8	1.72906	0.07	0.425926	0.1	54.0741	12.7	29.9	8.55	28.5781	52.0971	19.3247
Single point	Andean Arc	ANDEAN ARC / SOUTHERN ANDEAN VOLCANIC ZONE / CHILE / CASABLANCA	1239	36.0518	0.12	2.50288		51.475	0.76	7.23378	0.58	3.48555	0.27		11.3095	0.8					61.0526	12.7			28.1181	50.3396	21.5422
Median	Andean Arc	ANDEAN ARC / SOUTHERN ANDEAN VOLCANIC ZONE / CHILE / HUILILCO	994	34.1433	0	2.5		53.8495	0.923192	7.40469	0.534816	3.73382	0.0230094		11.2919	1.12563	1.89474	0.0835639	0.65	0.0750555	70.75	8.47354	60	0	25.5656	49.3976	25.0367
Median	Andean Arc	ANDEAN ARC / SOUTHERN ANDEAN VOLCANIC ZONE / CHILE / LA PICADA	1142	35.2962	0	2.5		51.8381	0.580049	7.58337	0.0732055	3.16449	0.215539		11.0353	1.27461	1.6875	0.0767977	0.555556	0.0788129	78.8889	1.38378			27.2534	49.6919	23.0547
Median	Andean Arc	ANDEAN ARC / SOUTHERN ANDEAN VOLCANIC ZONE / CHILE / MOCHO-CHOSHUENCO	719	32.001	0.0747191	2.50112		50.6549	0.728019	7.49213	0.286745	3.74509	0.340511		12.9678	0.67815	2.00666	0.039201	0.761458	0.19024	73.3989	18.6685	61.2606	23.4667	28.5511	50.8955	20.5534
Median	Andean Arc	ANDEAN ARC / SOUTHERN ANDEAN VOLCANIC ZONE / CHILE / PALENA	113	27.2803	0	2.5		50.2356	0.0357809	8.26836	0.0858543	3.07374	0.0376797		9.57465	0.555065	1.78947	0.07			40.3366	10.9289	53	1.41421	30.0238	48.9889	20.9872
Median	Andean Arc	ANDEAN ARC / SOUTHERN ANDEAN VOLCANIC ZONE / CHILE / POCOIHUEN	25	26.5947	0	2.5		52.3057	0.0207478	7.64882	0.126252	3.40566	0.050919		12.3708	0.268194			0.881154	0.0864846	95.2692	19.4182			26.6379	50.342	23.02
Median	Andean Arc	ANDEAN ARC / SOUTHERN ANDEAN VOLCANIC ZONE / CHILE / PUYEHUE	1951	41.5983	2.13607	3.28828		51.4223	1.91531	9.52625	3.79419	2.93039	0.44122		11.463	0.804038	1.74682	0.0177938	0.604815	0.403578	79.9176	17.6374	72	31.1127	32.2784	45.8857	21.8359
Single point	Andean Arc	ANDEAN ARC / SOUTHERN ANDEAN VOLCANIC ZONE / CHILE / QUIZAPU	2079	42.5954	0.12	2.50288		51.2588	0.76	13.5934	0.58	3.01523	0.27		11.131	0.8							84	8.55	40.6649	40.9153	18.4197
Median	Andean Arc	ANDEAN ARC / SOUTHERN ANDEAN VOLCANIC ZONE / CHILE / RELONCAVI	751	32.2503	0	2.5		51.8048	0.607908	8.57229	0.682295	3.47334	0.150976		12.2099	0.490153			0.636111	0.205789	84.4444	10.7053			29.1061	49.7046	21.1893
Median	Andean Arc	ANDEAN ARC / SOUTHERN ANDEAN VOLCANIC ZONE / CHILE / SAN JORGE	754	32.2737	2.1422	3.29227		51.4534	0.494801	10.8898	0.703219	2.8443	2.8443		11.0902	1.05029	1.72611	0.0867467	0.492958	0.123671	97.9568	29.5806	80	9.16156	35.1722	44.0459	20.7819
Median	Andean Arc	ANDEAN ARC / SOUTHERN ANDEAN VOLCANIC ZONE / CHILE / SAN PEDRO-PELLADO/TATARA	2687	47.3317	0	2.5		52.7692	0.0223383	7.44003	0.0424513	4.33124	0.0822609		11.8302	0.318356			0.6	0.1	85.7331	10.1281			27.3494	50.7264	21.9241
Single point	Andean Arc	ANDEAN ARC / SOUTHERN ANDEAN VOLCANIC ZONE / CHILE / SOUTH MINCHINMAVIDA	315	28.8539	0.12	2.50288		51.2296	0.76	8.23803	0.58	3.65348	0.27		11.212	0.8	1.81818	0.07			41.5686	12.7	48	8.55	29.3114	50.0215	20.6671
Median	Andean Arc	ANDEAN ARC / SOUTHERN ANDEAN VOLCANIC ZONE / CHILE / VILLARRICA	1996.5	41.9527	3.04612	3.94067		52.1253	0.174168	7.44003	0.00054187	3.55638	0.0532172		11.5695	0.556766	1.74046	0.07	0.666531	0.025003	95.2189	0.806843	133.161	8.55	27.2857	50.3957	22.3185
Single point	Andean Arc	ANDEAN ARC / SOUTHERN ANDEAN VOLCANIC ZONE / CHILE / VILLARRICA	2431	45.3375	0.12	2.50288		49.868	0.76	9.58765	0.58	3.42271	0.27		12.5211	0.8	1.68667	0.07					94	8.55	32.0678	51.1012	16.831
Median	Banda Arc	BANDA ARC / BANDA ARC / ATAURO	65	26.9063	2.49961	3.53526		54.4209	0.0360791	8.54163	0.742342	2.33096	0.150259		13.0891	0.501513	1.59123	0.0111293	0.88806	0.0595002	55.4587	6.50363	83.3994	4.51767	23.3315	48.2389	28.4296
Median	Bismarck-New Britain Arc	BISMARCK ARC - NEW BRITAIN ARC / BISMARCK ARC - NEW BRITAIN ARC / NEW BRITAIN / KIMBE	18	26.5402	0	2.5		52.0722	4.41537	7.49546	1.69949	2.3632	1.00154		9.55246	1.97709	1.57143	0.0822157	0.864198	0.232696	240.821	64.2441	68	22.8983	26.5347	47.4069	26.0584
Single point	Bismarck-New Britain Arc	BISMARCK ARC - NEW BRITAIN ARC / BISMARCK ARC - NEW BRITAIN ARC / NEW BRITAIN / LIKURUANGA	544	30.6378	0.12	2.50288		51.754	0.76	10.0577	0.58	1.75883	0.27		8.28443	0.8	1.37634	0.07	0.506329	0.1	449.367	12.7	75	8.55	32.8648	42.1139	25.0213
Single point	Bismarck-New Britain Arc	BISMARCK ARC - NEW BRITAIN ARC / BISMARCK ARC - NEW BRITAIN ARC / NEW BRITAIN / RABAUL / TALILI PYROCLASTIC SUBGROUP	3	26.4234	0.12	2.50288		49.3027	0.76	7.30739	0.58	2.49746	0.27		10.7811	0.8					105	12.7	108	8.55	26.2329	53.2259	20.5412
Median	Bismarck-New Britain Arc	BISMARCK ARC - NEW BRITAIN ARC / BISMARCK ARC - NEW BRITAIN ARC / NEW BRITAIN / SULU	15	26.5168	0	2.5		53.7076	0.945702	8.44846	1.07302	2.01346	0.316753		7.52655	0.547925	1.48193	0.049431	0.492958	0.0729781	239.437	6.98066	86	5.94138	28.6026	43.3099	28.0875
Median	Bismarck-New Britain Arc	BISMARCK ARC - NEW BRITAIN ARC / BISMARCK ARC - NEW BRITAIN ARC / WITU ISLANDS	121	27.3426	0	2.5		51.1707	2.1815	7.99761	0.827875	2.49267	0.90848		9.1926	0.342014	1.58102	0.0425574	0.296204	0.270404	45.8976	23.0164	68	11.1355	27.4117	49.4439	23.1444
Single point	Bismarck-New Britain Arc	BISMARCK ARC - NEW BRITAIN ARC / BISMARCK ARC - NEW BRITAIN ARC / WITU ISLANDS / UNDAKA	46	26.7583	0.12	2.50288		49.7272	0.76	10.9157	0.58	2.36508	0.27		8.70348	0.8	1.76887	0.07	0.0942588	0.09	9.71151	9.71	82	8.55	35.5929	45.7352	18.6719
Median	Bismarck-New Britain Arc	BISMARCK ARC - NEW BRITAIN ARC / BISMARCK ARC - NEW BRITAIN ARC / WITU ISLANDS / WAMBU	30	26.6337	0	2.5		49.4703	0.522122	8.88775	2.06754	2.72074	0.167208		10.0133	0.560195					9.58333	2.94628	81	9.89949	31.4231	49.3767	19.2002
Single point	Cascades Arc	CASCADES / ANCESTRAL CASCADES / SIERRA NEVADA	967	33.9329	0.12	2.50288		49.7544	0.76	12.1717	0.58	2.77702	0.27		11.8795	0.8	1.60412	0.07	0.424138	0.1	87.5862	12.7			38.3073	44.1759	17.5168
Single point	Cascades Arc	CASCADES / GARIBALDI VOLCANIC BELT / WASHINGTON / SILVERTHRONE VOLCANIC FIELD / KLINAKLINI RIVER FLOW	213	28.0593	0.12	2.50288		47.794	0.76	7.2452	0.58	3.29789	0.27		9.26257	0.8	1.92373	0.07	0.0698718	0.07	12.2436	12.24	61.1	8.55	29.4397	54.1043	16.456
Single point	Cascades Arc	CASCADES / HIGH CASCADES / BRITISH COLUMBIA / MOUNT GARIBALDI VOLCANIC FIELD	1498	38.0694	0.12	2.50288		51.206	0.76	7.50818	0.58	3.91157	0.27		12.8287	0.8	2.41937	0.07	0.0927726	0.09	19.897	12.7	46.9846	8.55	29.6904	50.5283	19.7813
Median	Cascades Arc	CASCADES / HIGH CASCADES / CALIFORNIA / LASSEN VOLCANIC CENTER	215.5	28.0787	0.137709	2.50379		49.7119	1.75016	9.71581	0.400951	2.74531	0.0591995		11.0962	1.06484	1.44846	0.00860285	0.267539	0.0955149	65.9724	8.2981			31.5495	49.6859	18.7646
Median	Cascades Arc	CASCADES / HIGH CASCADES / CALIFORNIA / LASSEN VOLCANIC CENTER	2046	42.3383	0.749137	2.60983		50.0703	0.545285	9.57784	1.6006	3.81527	0.195566		13.232	1.26461			0.195174	0.00448808	36.3726	0.688573	62	16.9706	31.3031	51.6221	17.0748
Single point	Cascades Arc	CASCADES / HIGH CASCADES / CALIFORNIA / LASSEN VOLCANIC CENTER	1764	40.1416	0.12	2.50288		49.9378	0.76	8.26244	0.58	4.11609	0.27		11.9201	0.8	1.8914	0.07	0.220339	0.1	44.431	12.7	66	8.55	28.9939	54.4212	16.5849
Single point	Cascades Arc	CASCADES / HIGH CASCADES / CALIFORNIA / LASSEN VOLCANIC CENTER	1723	39.8222	0.12	2.50288		51.4478	0.76	8.06532	0.58	4.16792	0.27		11.7007	0.8	1.86893	0.07	0.187619	0.1	38.1905	12.7	71	8.55	27.9546	52.3776	19.6678
Single point	Cascades Arc	CASCADES / HIGH CASCADES / CALIFORNIA / LASSEN VOLCANIC CENTER	168	27.7087	0.12	2.50288		49.6765	0.76	10.3367	0.58	2.82303	0.27		9.96863	0.8	1.51938	0.07	1.38298	0.1	159.043	12.7	79	8.55	34.2953	47.3124	18.3923
Single point	Cascades Arc	CASCADES / HIGH CASCADES / CALIFORNIA / LASSEN VOLCANIC CENTER	323	28.9162	0.12	2.50288		48.2306	0.76	10.1064	0.58	2.6897	0.27		9.90214	0.8	1.41071	0.07	0.205882	0.1	82.0588	12.7	93	8.55	33.8867	50.148	15.9653
Single point	Cascades Arc	CASCADES / HIGH CASCADES / CALIFORNIA / LASSEN VOLCANIC CENTER	1633	39.1211	0.12	2.50288		48.3306	0.76	9.77596	0.58	2.84791	0.27		10.2826	0.8	1.49831	0.07	0.258065	0.1	72.0161	12.7	121	8.55	33.1971	50.7876	16.0152
Median	Cascades Arc	CASCADES / HIGH CASCADES / CALIFORNIA / LASSEN VOLCANIC CENTER	1512.5	38.1824	0.313977	2.51964		54.7288	4.99143	9.3279	2.47532	3.40781	0.913925		12.5298	2.00805	1.71471	0.244721	0.472381	0.092934	81.1429	9.15872	59.5	13.435	28.5192	46.0747	25.4061
Single point	Cascades Arc	CASCADES / HIGH CASCADES / CALIFORNIA / MOUNT SHASTA	958	33.8628	0.12	2.50288		50.3823	0.76	9.4607	0.58	2.81374	0.27		10.6942	0.8									30.2963	49.4077	20.296
Median	Cascades Arc	CASCADES / HIGH CASCADES / CALIFORNIA / MOUNT SHASTA	1509	38.1551	0.84578	2.63919		49.7999	0.24322	9.38107	0.296725	2.82353	0.16374		11.3354	0.924586	1.59398	0.07	0.225	0.1	43.9286	6.619	31	8.55	30.7089	50.0912	19.1999
Median	Cascades Arc	CASCADES / HIGH CASCADES / CALIFORNIA / MOUNT SHASTA	1377	37.1268	2.2922	3.39178		52.3952	1.11886	9.84098	1.14004	3.13	0.417072		11.5477	1.17935	1.61765	0.14782	0.333333	0.233058	51.4286	11.2544	51	11.2561	30.881	46.9127	22.2062
Single point	Cascades Arc	CASCADES / HIGH CASCADES / CALIFORNIA / MOUNT SHASTA	1059	34.6496	0.12	2.50288		49.2313	0.76	9.26823	0.58	2.95388	0.27		11.6466	0.8	1.688	0.07	0.296651	0.1	56.5072	12.7	28	8.55	31.6239	50.5555	17.8206
Median	Cascades Arc	CASCADES / HIGH CASCADES / CALIFORNIA / MOUNT SHASTA	2537	46.1632	0.198576	2.50787		53.932	0.222465	8.26083	0.579372	3.73	0.356056		12.2007	0.538183					60	8.63005			26.5621	49.822	23.6159
Median	Cascades Arc	CASCADES / HIGH CASCADES / CALIFORNIA / MOUNT SHASTA	1774	40.2195	0	2.5		57.8642	0.191792	8.74	0.414283	3.88466	0.5903		12.6626	0.557418	1.79048	0.07			47.7143	24.1477	56	8.55	25.3065	45.1299	29.5635
Single point	Cascades Arc	CASCADES / HIGH CASCADES / CALIFORNIA / MOUNT SHASTA	1377	37.1268	0.12	2.50288		53.0472	0.76	8.96487	0.58	3.53781	0.27		14.0257	0.8	1.71538	0.07	0.432258	0.1	94.1935	12.7	65	8.55	28.3208	49.2766	22.4026
Median	Cascades Arc	CASCADES / HIGH CASCADES / OREGON	941	33.7304	0.991505	2.68944		50.7879	1.03192	8.12794	0.0580035	4.02113	0.215545		10.8564	0.782772	1.83618	0.0314111	0.0861439	0.00849029	16.7365	4.20738	63.96	5.69928	28.7146	52.5208	18.7646
Single point	Cascades Arc	CASCADES / HIGH CASCADES / OREGON	618	31.2142	0.12	2.50288		50.5253	0.76	9.95165	0.58	6.04568	0.27		19.1293	0.8	4.53271	0.07	1.10235	0.1	310.097	12.7			27.5699	61.5087	10.9214
Single point	Cascades Arc	CASCADES / HIGH CASCADES / OREGON / MOUNT MAZAMA	1110	35.0469	0.12	2.50288		47.971	0.76	9.62456	0.58	2.94809	0.27		10.0724	0.8	1.78261	0.07			38.5714	12.7	105	8.55	32.555	52.5609	14.8841
Single point	Cascades Arc	CASCADES / HIGH CASCADES / OREGON / MOUNT MAZAMA	1794	40.3753	0.12	2.50288		49.9551	0.76	7.99483	0.58	3.44068	0.27		10.4506	0.8			0.273438	0.1	52.1875	12.7	99	8.55	26.8353	54.9518	18.2129
Single point	Cascades Arc	CASCADES / HIGH CASCADES / OREGON / MOUNT MAZAMA	1175	35.5532	0.12	2.50288		48.9247	0.76	9.05456	0.58	3.30467	0.27		10.6132	0.8	1.7459	0.07	0.303249	0.1	44.4043	12.7	84	8.55	30.8853	52.943	16.1716
Median	Cascades Arc	CASCADES / HIGH CASCADES / OREGON / MOUNT MAZAMA	1882	41.0608	0.877488	2.64953		52.2238	1.89804	7.67432	2.74271	4.45261	0.841663		13.1138	1.66926	1.76623	0.07	0.347083	0.137665	71.1275	18.6902	72	9.55186	25.1796	55.2585	19.5619
Median	Cascades Arc	CASCADES / HIGH CASCADES / OREGON / MOUNT MAZAMA	1850	40.8115	0.869095	2.64676		53.076	1.97037	8.22223	0.653832	4.63694	0.647738		14.2503	1.95581	1.99058	0.198254	0.328247	0.063347	60.5264	13.319	70.5	19.3792	26.4973	53.3775	20.1252
Median	Cascades Arc	CASCADES / HIGH CASCADES / OREGON / MOUNT MAZAMA	1079	34.8054	1.43217	2.88117		54.0903	0.0363822	7.58442	0.824628	4.75229	0.124578		14.794	0.267732			0.4	0.0353553	84.4531	20.2188	50	8.55	24.7117	53.1151	22.1731
Single point	Cascades Arc	CASCADES / HIGH CASCADES / OREGON / MOUNT MAZAMA	2172	43.3199	0.12	2.50288		53.872	0.76	7.26275	0.58	4.91832	0.27		15.1983	0.8			0.364865	0.1	74.0541	12.7	73	8.55	23.5986	54.6947	21.7067
Single point	Cascades Arc	CASCADES / HIGH CASCADES / OREGON / MOUNT WASHINGTON	1205	35.7869	0.12	2.50288		50.2473	0.76	7.81424	0.58	3.85664	0.27		10.9614	0.8							50	8.55	28.6517	52.5398	18.8084
Single point	Cascades Arc	CASCADES / HIGH CASCADES / OREGON / PRE-MAZAMA GROUP	1685	39.5262	0.12	2.50288		51.6735	0.76	8.84243	0.58	3.6353	0.27		10.8175	0.8	1.71614	0.07	0.184055	0.1	30.508	12.7	58.43	8.55	29.8183	49.5876	20.5941
Median	Cascades Arc	CASCADES / HIGH CASCADES / OREGON / SAND MOUNTAIN GROUP	1307.5	36.5854	0.060592	2.50073		51.0638	1.42539	8.0618	1.43312	4.10897	0.266696		11.2762	0.816197	1.83777	0.00328491	0.117516	0.00758802	28.8455	2.32229	58.72	0.367696	27.6289	53.409	18.9622
Median	Cascades Arc	CASCADES / HIGH CASCADES / OREGON / THREE SISTERS	1150	35.3585	0	2.5		52.5055	1.16584	8.94449	0.605008	4.35217	0.479321		11.5716	1.26582	1.82609	0.0926	0.510949	0.220219	44.6835	9.00776	15	10.4386	29.7489	50.1544	20.0966
Median	Cascades Arc	CASCADES / HIGH CASCADES / OREGON / THREE SISTERS	2441	45.4154	0	2.5		51.6315	0.694621	7.84678	0.502393	3.96626	0.113618		11.5867	0.466329					31.9286	7.55226	67	5.37035	27.3563	52.3852	20.2585
Median	Cascades Arc	CASCADES / HIGH CASCADES / WASHINGTON	687.5	31.7556	1.71118	3.02955		49.7499	1.12929	8.81983	0.460503	4.35021	0.732323		11.443	1.16647	2.19663	0.248074	0.304091	0.128704	30.9935	12.2198	88.5	9.48683	29.4798	54.8027	15.7174
Median	Cascades Arc	CASCADES / HIGH CASCADES / WASHINGTON / MOUNT ADAMS	692	31.7907	1.17879	2.76397		48.0615	0.21307	8.49739	0.326707	2.90277	0.241479		7.29471	0.226036			0.117167	0.1	13.0333	3.34697	61.5	2.12132	33.3464	49.6538	16.9998
Median	Cascades Arc	CASCADES / HIGH CASCADES / WASHINGTON / MOUNT ADAMS	1373.5	37.0996	1.15125	2.75234		48.2005	0.0246107	8.82588	0.0175217	3.29269	0.0854357		8.28943	2.40279	1.90455	0.07	0.135469	0.0735836	14.033	7.0244	66	2.82843	32.9198	51.5459	15.5342
Median	Cascades Arc	CASCADES / HIGH CASCADES / WASHINGTON / MOUNT ADAMS	1100.5	34.9729	0.203809	2.50829		50.2383	2.05476	7.88957	0.325933	4.41654	0.709455		8.32803	0.373018			0.1868	0.1	46.025	46.03	55	5.65685	28.9891	54.3939	16.6169
Median	Cascades Arc	CASCADES / HIGH CASCADES / WASHINGTON / MOUNT ADAMS	1729	39.8689	0.674634	2.58943		49.8192	0.20529	7.39327	0.38586	4.56006	0.392025		8.35955	1.81704			0.195625	0.1	9.84615	9.28191	61	1.41421	26.885	56.6002	16.5148
Median	Cascades Arc	CASCADES / HIGH CASCADES / WASHINGTON / MOUNT ADAMS	984	34.0654	0.535361	2.55668		49.1293	0.527261	8.14543	0.509834	4.88882	0.316416		8.4096	1.11826	2.16092	0.07	0.124067	0.0252087	16.1875	6.99126	62.5	7.57338	28.3672	58.3474	13.2854
Single point	Cascades Arc	CASCADES / HIGH CASCADES / WASHINGTON / MOUNT ADAMS	541	30.6144	0.12	2.50288		48.3244	0.76	9.66488	0.58	3.0371	0.27		9.16949	0.8	1.97207	0.07	0.0829876	0.08	10.7884	10.79	58	8.55	35.3156	48.8856	15.7988
Single point	Cascades Arc	CASCADES / HIGH CASCADES / WASHINGTON / MOUNT ADAMS	1130	35.2027	0.12	2.50288		49.3341	0.76	8.40899	0.58	4.66144	0.27		10.3424	0.8			0.0938462	0.09	11.9615	11.96			30.7821	54.9245	14.2934
Single point	Cascades Arc	CASCADES / HIGH CASCADES / WASHINGTON / MOUNT BAKER	354	29.1577	0.12	2.50288		52.5337	0.76	7.55683	0.58	4.47672	0.27		11.4968	0.8	1.90743	0.07	0.292157	0.1	57.7763	12.7	50	8.55	26.1808	53.1764	20.6428
Median	Cascades Arc	CASCADES / HIGH CASCADES / WASHINGTON / MOUNT BAKER	1459	37.7656	0	2.5		52.3117	2.07555	8.07059	0.431314	3.70354	0.096026		11.4999	0.600442	1.98939	0.114914	0.42556	0.196336	85.9405	10.0795	31	8.61846	27.3633	50.9966	21.6401
Single point	Cascades Arc	CASCADES / HIGH CASCADES / WASHINGTON / MOUNT RAINIER	791	32.5619	0.12	2.50288		49.875	0.76	8.67087	0.58	3.51035	0.27		10.2576	0.8	2.03015	0.07	0.104762	0.1	14.0476	12.7	47	8.55	30.4023	51.5993	17.9984
Median	Cascades Arc	CASCADES / HIGH CASCADES / WASHINGTON / MOUNT RAINIER	1032	34.4393	2.06013	3.23946		50.8075	0.159148	8.57454	1.02465	3.8748	0.218918		11.7459	1.16015	2.19698	0.199666	0.176754	0.0464358	22.7175	0.743496	54.5	10.6066	30.0704	50.9127	19.0169
Single point	Cascades Arc	CASCADES / HIGH CASCADES / WASHINGTON / MOUNT RAINIER	1754	40.0637	0.12	2.50288		55.48	0.76	8.26	0.58	3.39	0.27		12.5589	0.8	2.1105	0.07	0.388095	0.1	34.5238	12.7	48	8.55	28.1502	43.8824	27.9674
Single point	Cascades Arc	CASCADES / HIGH CASCADES / WASHINGTON / MOUNT RAINIER	1082	34.8288	0.12	2.50288		53.51	0.76	8.94	0.58	4.6	0.27		12.9152	0.8	2.14141	0.07	0.765116	0.1	42.7907	12.7	25	8.55	28.8315	49.8291	21.3395
Median	Cascades Arc	CASCADES / HIGH CASCADES / WASHINGTON / MOUNT ST. HELENS	1647	39.2301	1.37202	2.85174		49.942	0.740469	7.15465	0.100767	5.13148	0.153975		9.08708	1.52951	2.16418	0.132412	0.0824886	0.00511293	11.0802	1.47741	53.7	4.53685	26.0547	58.8448	15.1005
Single point	Cascades Arc	CASCADES / HIGH CASCADES / WASHINGTON / MOUNT ST. HELENS	1253	36.1609	0.12	2.50288		49.8791	0.76	7.17308	0.58	5.27907	0.27		9.30742	0.8	2.00527	0.07	0.0753075	0.08	10.9211	10.92	50.1	8.55	25.6845	59.7743	14.5411
Median	Cascades Arc	CASCADES / HIGH CASCADES / WASHINGTON / MOUNT ST. HELENS / CASTLE CREEK FLOWS	295	28.6981	0	2.5		50.2614	0.055256	7.09898	0.0395835	3.87324	0.0124421		8.4778	0.167091	1.86792	0.0552769	0.124615	0.00428298	18.541	0.271359	70.3	4.50814	27.2182	54.3531	18.4286
Median	Central American Volcanic Arc	CENTRAL AMERICAN VOLCANIC ARC / CENTRAL AMERICAN VOLCANIC ARC-NORTHWESTERN SEGMENT / NICARAGUA / CERRO NEGRO	548	30.6689	0	2.5		48.7025	0.801954	9.91332	0.354754	2.00515	0.29907		8.98672	0.507731	1.69231	0.07	0.275862	0.1			135.07	8.55	35.7017	45.5367	18.7616
Single point	Central American Volcanic Arc	CENTRAL AMERICAN VOLCANIC ARC / CENTRAL AMERICAN VOLCANIC ARC-NORTHWESTERN SEGMENT / NICARAGUA / GRANADA	253	28.3709	0.12	2.50288		49.0427	0.76	7.37176	0.58	2.52892	0.27		9.97818	0.8					31.3333	12.7			28.1844	52.283	19.5326
Median	Central American Volcanic Arc	CENTRAL AMERICAN VOLCANIC ARC / CENTRAL AMERICAN VOLCANIC ARC-NORTHWESTERN SEGMENT / NICARAGUA / NEJAPA / NEJAPA FORMATION	160	27.6464	0.0098248	2.50002		47.9903	0.37836	8.9028	0.702905	1.98849	0.157935		8.60969	0.578763									31.7337	51.0959	17.1705
Median	Central American Volcanic Arc	CENTRAL AMERICAN VOLCANIC ARC / CENTRAL AMERICAN VOLCANIC ARC-NORTHWESTERN SEGMENT / NICARAGUA / NEJAPA / NEJAPA FORMATION	174	27.7555	0.529388	2.55544		48.1837	1.36339	9.27346	1.53738	2.25873	0.275839		9.33928	1.23691					40.3333	12.7	111.5	14.5917	32.7883	49.6809	17.5308
Median	Central American Volcanic Arc	CENTRAL AMERICAN VOLCANIC ARC / CENTRAL AMERICAN VOLCANIC ARC-NORTHWESTERN SEGMENT / NICARAGUA / NEJAPA-MIRAFLORES	874	33.2085	0	2.5		48.158	0.596477	8.7075	1.09443	2.09931	0.312656		9.11565	0.623718	1.7974	0.0518719			84	54.445	122.355	17.6697	31.8756	49.7722	18.3522
Median	Central American Volcanic Arc	CENTRAL AMERICAN VOLCANIC ARC / CENTRAL AMERICAN VOLCANIC ARC-SOUTHEASTERN SEGMENT / COSTA RICA / CERRO CHOPO	227	28.1683	0	2.5		49.4559	0.407881	7.0987	0.140392	3.01477	0.0514162		7.40973	3.45582					160.5	47.3762	118	3.83406	26.8874	53.2939	19.8187
Median	Central American Volcanic Arc	CENTRAL AMERICAN VOLCANIC ARC / CENTRAL AMERICAN VOLCANIC ARC-SOUTHEASTERN SEGMENT / PANAMA / EL BARU / CUESTA UNIT	795	32.593	0	2.5		50.8376	2.14577	11.3369	3.09182	4.02855	0.542321		11.426	1.05212	2.46473	0.148906	0.355066	0.147986	78.3729	25.5373	153.5	25.0093	35.0607	48.0769	16.8623
Single point	Honshu Arc	HONSHU ARC / NORTHEASTERN HONSHU ARC / HOKKAIDO / USU	217	28.0904	0.12	2.50288		49.7801	0.76	8.9964	0.58	2.21911	0.27		11.1076	0.8					75.3	12.7	58.1	8.55	34.2625	44.7734	20.9641
Median	Honshu Arc	HONSHU ARC / NORTHEASTERN HONSHU ARC / HONSHU	747	32.2191	2.09544	3.26203		51.7422	1.81492	7.40608	0.347271	2.1769	0.199104		10.6647	0.549116	1.7554	0.0913588	0.219281	0.175255	56.6932	11.7095	54	6.733	28.6226	45.4159	25.9615
Median	Honshu Arc	HONSHU ARC / NORTHEASTERN HONSHU ARC / HONSHU / AZUMA	512	30.3885	0	2.5		53.1601	0.785172	7.75162	0.198484	3.23592	0.113089		11.0914	0.377382	1.65812	0.025821	1.17625	0.135629	119.923	7.96036	48.6	14.3786	28.0095	46.4517	25.5388
Single point	Honshu Arc	HONSHU ARC / NORTHEASTERN HONSHU ARC / HONSHU / HACHIMANTAI VOLCANIC GROUP	1342	36.8542	0.12	2.50288		51.3591	0.76	6.99942	0.58	2.04057	0.27		9.9773	0.8					58.3258	12.7			26.0817	48.0597	25.8586
Median	Honshu Arc	HONSHU ARC / NORTHEASTERN HONSHU ARC / HONSHU / IWATE	1811	40.5077	1.77446	3.06573		51.8058	0.578166	7.23009	0.384415	2.12005	0.109589		10.3239	0.394319					47.9604	11.5187			28.2673	45.3949	26.3378
Median	Honshu Arc	HONSHU ARC / SOUTHWESTERN HONSHU ARC / HONSHU / ABU VOLCANO GROUP	319	28.885	0	2.5		50.135	1.81381	8.54915	1.72624	3.9804	0.18712		8.40346	1.783							30	12.2882	29.3882	52.987	17.6248
Median	Honshu Arc	HONSHU ARC / SOUTHWESTERN HONSHU ARC / HONSHU / ABU VOLCANO GROUP - IRAO	424	29.703	0	2.5		50.1405	0.412565	7.81829	0.327891	4.6532	0.53405		15.714	0.870533					18	1.07874	30.5	12.8439	28.6388	54.6606	16.7006
Single point	Honshu Arc	HONSHU ARC / SOUTHWESTERN HONSHU ARC / KYUSHU	243	28.293	0.12	2.50288		53.3655	0.76	7.91585	0.58	4.33633	0.27		13.8239	0.8									26.0521	51.5829	22.3649
Single point	Izu-Bonin Arc	IZU-BONIN ARC / IZU ARC / HACHIJOJIMA/HATIZYO-ZIMA / HIGASHIYAMA / ISHIZUMI LAVA	553	30.7079	0.12	2.50288		48.5503	0.76	8.76825	0.58	1.43971	0.27		9.26943	0.8							93	8.55	33.1804	44.956	21.8636
Median	Izu-Bonin Arc	IZU-BONIN ARC / IZU ARC / TORISHIMA/MITUGO-YAMA / TORISHIMA/MITUGO-YAMA	52	26.8051	0	2.5		48.6236	0.126014	7.60105	0.32605	1.37501	0.036024		8.38991	0.0493576	1.54918	0.0140388	0.13	0.0141421	62.675	7.17713	165.8	7.88226	28.734	48.9793	22.2867
Median	Kamchatka Arc	KAMCHATKA ARC / KAMCHATKA ARC	975	33.9952	0.737171	2.60642		50.8029	0.790197	9.31219	1.53145	3.7618	0.366158		10.6189	0.539664			0.339536	0.102089	97.4983	41.4009	88.6875	16.4632	32.4411	48.3176	19.2414
Median	Kamchatka Arc	KAMCHATKA ARC / KAMCHATKA ARC / CENTRAL KAMCHATKA SEGMENT	25	26.5947	0.0314829	2.5002		50.7447	1.53423	11.1245	2.26846	3.85235	0.23473		10.8497	0.551503									36.1651	48.0724	15.7625
Median	Kamchatka Arc	KAMCHATKA ARC / KAMCHATKA ARC / CENTRAL KAMCHATKA SEGMENT	1471	37.8591	1.71115	3.02953		54.2225	1.5889	7.51543	1.84807	4.30563	0.48681		11.0417	0.961896	1.97931	0.07	0.372881	0.1	280.508	12.7			25.3867	50.8166	23.7967
Median	Kamchatka Arc	KAMCHATKA ARC / KAMCHATKA ARC / CENTRAL KAMCHATKA SEGMENT	1794	40.3753	1.17671	2.76309		52.99	1.08297	8.08544	0.539697	3.62602	0.402922		12.151	0.413174	1.79531	0.061144	0.354839	0.133859	149.541	37.9078	74	21.1145	27.7795	48.9446	23.276
Median	Kamchatka Arc	KAMCHATKA ARC / KAMCHATKA ARC / CENTRAL KAMCHATKA SEGMENT	1164	35.4676	0	2.5		50.6677	1.05532	8.6212	0.672724	4.15793	0.59534		10.9247	1.01128	1.9021	0.125607	0.366047	0.10615	89.845	22.0702	57	12.9763	30.1432	51.9435	17.9133
Median	Kamchatka Arc	KAMCHATKA ARC / KAMCHATKA ARC / CENTRAL KAMCHATKA SEGMENT	536	30.5754	1.60113	2.96877		50.9813	0.795671	7.19226	0.0588371	3.3389	0.331918		10.9456	2.14633	1.7562	0.0284973	0.214286	0.125082	120	55.9511	74.1955	8.55	27.338	51.6074	21.0546
Median	Kamchatka Arc	KAMCHATKA ARC / KAMCHATKA ARC / CENTRAL KAMCHATKA SEGMENT	1734	39.9079	0	2.5		52.1657	0.196304	12.0563	0.0242418	4.59161	0.0403992		11.0687	0.391865			0.075	0.075	119	12.7	78	8.55	37.2434	45.9034	16.8533
Median	Kamchatka Arc	KAMCHATKA ARC / KAMCHATKA ARC / CENTRAL KAMCHATKA SEGMENT	887	33.3097	1.60417	2.97041		52.2156	1.0468	9.43046	2.01266	4.31105	0.370427		11.1221	0.423793	1.88474	0.182512	0.44181	0.0944841	262.917	18.2669			31.0554	50.4756	18.4691
Median	Kamchatka Arc	KAMCHATKA ARC / KAMCHATKA ARC / CENTRAL KAMCHATKA SEGMENT	2196	43.5068	0.238951	2.51139		53.8204	2.19658	9.36114	1.98093	4.45675	0.411952		12.1591	0.271083	1.71242	0.0681515	0.541012	0.160954	138.462	82.2789	80	31.8998	30.2156	48.2132	21.5712
Median	Kamchatka Arc	KAMCHATKA ARC / KAMCHATKA ARC / CENTRAL KAMCHATKA SEGMENT / AVACHA (AVACHINSKY)	545	30.6456	0.176268	2.50621		51.4886	2.75039	8.68764	1.39792	3.86962	0.0862563		9.28665	1.02806	1.76798	0.000962182	0.424645	0.126728	147.066	88.3124	58.3826	15.3129	29.5912	50.9582	19.4506
Median	Kamchatka Arc	KAMCHATKA ARC / KAMCHATKA ARC / CENTRAL KAMCHATKA SEGMENT / AVACHA (AVACHINSKY)	1214	35.8571	0.572145	2.56463		50.8283	2.20387	8.63782	1.59113	3.78466	0.400925		10.5265	0.570708	1.76956	0.07	0.580436	0.0701302	95.1351	83.8418	79	6.94103	30.7979	49.9317	19.2704
Single point	Kamchatka Arc	KAMCHATKA ARC / KAMCHATKA ARC / CENTRAL KAMCHATKA SEGMENT / AVACHA (AVACHINSKY)	2320	44.4728	0.12	2.50288		49.486	0.76	10.0383	0.58	3.47712	0.27		12.5772	0.8	1.85	0.07	0.223958	0.1	72.0833	12.7			34.0997	49.4697	16.4306
Single point	Kamchatka Arc	KAMCHATKA ARC / KAMCHATKA ARC / CENTRAL KAMCHATKA SEGMENT / BAKENING	996	34.1588	0.12	2.50288		50.2516	0.76	8.07003	0.58	4.05514	0.27		9.57592	0.8	1.89391	0.07	0.29521	0.1	79.8646	12.7	56.8746	8.55	28.3227	53.8699	17.8073
Single point	Kamchatka Arc	KAMCHATKA ARC / KAMCHATKA ARC / CENTRAL KAMCHATKA SEGMENT / BAKENING	805	32.6709	0.12	2.50288		50.753	0.76	9.13655	0.58	3.91566	0.27		9.77563	0.8	1.90788	0.07	0.374838	0.1	93.2745	12.7	85.8855	8.55	31.1954	50.2194	18.5853
Median	Kamchatka Arc	KAMCHATKA ARC / KAMCHATKA ARC / CENTRAL KAMCHATKA SEGMENT / KAMEN	1497	38.0616	0.0674634	2.50091		51.0851	0.782465	7.0393	0.0546062	3.48035	0.345772		11.682	0.151467	1.73799	0.0679317	0.259434	0.0377916	100	19.2302	77	28.2843	26.6293	52.3447	21.026
Median	Kamchatka Arc	KAMCHATKA ARC / KAMCHATKA ARC / CENTRAL KAMCHATKA SEGMENT / KARYMSKY	510	30.3729	0	2.5		48.4913	0.983524	9.74684	1.45859	2.68215	0.377812		9.44922	1.16876	1.76991	0.0419595	0.330769	0.13076	101.538	29.1105	124	28.5254	35.8441	47.3295	16.8263
Single point	Kamchatka Arc	KAMCHATKA ARC / KAMCHATKA ARC / CENTRAL KAMCHATKA SEGMENT / KIZIMEN	1497	38.0616	0.12	2.50288		52.2458	0.76	8.56872	0.58	3.50677	0.27		11.2838	0.8	1.64878	0.07	0.379167	0.1	149.167	12.7			29.9834	47.9718	22.0449
Median	Kamchatka Arc	KAMCHATKA ARC / KAMCHATKA ARC / CENTRAL KAMCHATKA SEGMENT / KLYUCHEVSKOY	4200	59.118	0	2.5		52.6964	1.1141	9.90262	1.49668	3.41152	0.316506		11.7714	0.795025	2.27329	0.07	0.439424	0.000813936	235.983	38.6789	78.25	8.13173	31.902	46.4759	21.622
Median	Kamchatka Arc	KAMCHATKA ARC / KAMCHATKA ARC / CENTRAL KAMCHATKA SEGMENT / KLYUCHEVSKOY	513	30.3963	1.289	2.81274		53.1859	0.950236	7.7163	1.84609	3.51409	0.341248		11.8695	1.51749			1.88889	0.267253	219.1	51.7007	42.8	24.059	26.9896	48.5665	24.4439
Single point	Kamchatka Arc	KAMCHATKA ARC / KAMCHATKA ARC / CENTRAL KAMCHATKA SEGMENT / PLOSKIY	1366	37.0411	0.12	2.50288		50.7423	0.76	9.59935	0.58	3.66077	0.27		11.8026	0.8	1.76	0.07	0.234318	0.1	67.5	12.7			32.6942	49.1385	18.1674
Median	Kamchatka Arc	KAMCHATKA ARC / KAMCHATKA ARC / CENTRAL KAMCHATKA SEGMENT / SHISHEISKY COMPLEX	484	30.1704	0	2.5		53.5451	1.5837	9.64373	1.01503	4.68973	0.639715		11.3847	0.565044					86.2	29.1189			29.9336	50.2156	19.8508
Single point	Kamchatka Arc	KAMCHATKA ARC / KAMCHATKA ARC / CENTRAL KAMCHATKA SEGMENT / STUDENAYA	481	30.147	0.12	2.50288		52.108	0.76	10.6484	0.58	4.59746	0.27		9.82451	0.8									33.8386	48.2565	17.9049
Single point	Kamchatka Arc	KAMCHATKA ARC / KAMCHATKA ARC / CENTRAL KAMCHATKA SEGMENT / TOLBACHIK	1860	40.8894	0.12	2.50288		51.1987	0.76	8.64486	0.58	4.2564	0.27		11.9338	0.8			0.321429	0.1	112.857	12.7			29.652	52.3604	17.9876
Median	Kamchatka Arc	KAMCHATKA ARC / KAMCHATKA ARC / CENTRAL KAMCHATKA SEGMENT / TOLBACHIK	2673	47.2227	2.26101	3.37078		50.8754	0.2741	9.05615	0.428306	4.01718	0.330047		12.0099	0.82402	1.89882	0.0222827	0.326667	0.0111029	92.2873	26.8819	268	13.3433	31.331	50.6637	18.0053
Median	Kamchatka Arc	KAMCHATKA ARC / KAMCHATKA ARC / CENTRAL KAMCHATKA SEGMENT / TOLBACHIK	582	30.9338	0	2.5		50.4455	0.266659	9.88309	1.38619	3.55014	0.704732		12.0937	4.53729	1.775	0.0353553	0.304107	0.163897	127.222	24.0796	142.5	3.53553	33.6693	49.0294	17.3014
Single point	Kamchatka Arc	KAMCHATKA ARC / KAMCHATKA ARC / CENTRAL KAMCHATKA SEGMENT / TOLMACHEV DOL	731	32.0945	0.12	2.50288		51.7597	0.76	7.0085	0.58	4.21723	0.27		12.0007	0.8					67.4	12.7			26.5241	52.9067	20.5692
Median	Kamchatka Arc	KAMCHATKA ARC / KAMCHATKA ARC / CENTRAL KAMCHATKA SEGMENT / ZARECHNY	14	26.5091	0	2.5		52.5013	0.339079	8.80273	0.813538	4.30484	0.0426725		11.5004	0.138455									29.4269	51.1674	19.4057
Median	Kamchatka Arc	KAMCHATKA ARC / KAMCHATKA ARC / EASTERN KAMCHATKA SEGMENT / KOMAROV	1141	35.2884	0	2.5		53.1437	1.60527	7.82898	0.593929	3.24728	0.196337		11.4249	0.399446	1.59265	0.060312	0.563448	0.202866	155.914	55.0324	53.6	8.55	27.8786	47.3141	24.8073
Single point	Kamchatka Arc	KAMCHATKA ARC / KAMCHATKA ARC / EASTERN KAMCHATKA SEGMENT / MALYI SEMYACHIK	200	27.958	0.12	2.50288		49.6238	0.76	9.77222	0.58	2.62355	0.27		9.93685	0.8	1.75	0.07	0.081	0.08	31.75	12.7			35.7427	44.3418	19.9155
Single point	Kamchatka Arc	KAMCHATKA ARC / KAMCHATKA ARC / EASTERN KAMCHATKA SEGMENT / SHMIDT	922	33.5824	0.12	2.50288		51.2954	0.76	8.18091	0.58	2.94999	0.27		10.6273	0.8	1.5	0.07	0.428571	0.1	142.105	12.7	113.2	8.55	29.3964	48.4173	22.1863
Single point	Kamchatka Arc	KAMCHATKA ARC / KAMCHATKA ARC / SOUTHERN KAMCHATKA SEGMENT / KSUDACH	513	30.3963	0.12	2.50288		48.8462	0.76	7.96373	0.58	2.13785	0.27		8.37846	0.8							123	8.55	29.5374	50.0972	20.3654
Median	Kermadec Arc	KERMADEC ARC / KERMADEC ISLANDS / MACAULEY	62	26.883	0	2.5		49.451	0.73468	8.06015	0.850996	1.5919	0.506856		8.81824	1.04911	1.66858	0.0493047	0.82	0.20657	47	47			28.285	49.1854	22.5296
Median	Kermadec Arc	KERMADEC ARC / KERMADEC ISLANDS / RAOUL / RAOUL	186	27.8489	0	2.5		49.7796	2.28294	7.49239	1.76837	2.08382	0.604951		10.3867	2.93525	1.52941	0.0395131	0.53871	0.290619	153.125	84.5126	117	39.8604	28.6304	48.1411	23.2286
Single point	Lesser Antilles Arc	LESSER ANTILLES / LESSER ANTILLES / BEQUIA (THE GRENADINES)	63	26.8908	0.12	2.50288		50.5993	0.76	8.0787	0.58	2.94617	0.27		10.2154	0.8	1.62896	0.07	0.571429	0.1	67.1429	12.7	70	8.55	28.6396	50.96	20.4004
Single point	Lesser Antilles Arc	LESSER ANTILLES / LESSER ANTILLES / DOMINICA	218	28.0982	0.12	2.50288		51.49	0.76	7.80458	0.58	2.63531	0.27		12.9443	0.8	1.86667	0.07	1.3	0.1	164	12.7			24.942	51.5322	23.5258
Median	Lesser Antilles Arc	LESSER ANTILLES / LESSER ANTILLES / GRENADA	474	30.0925	1.23	2.78		46.95	0.82	14.18	2.33	2.86	0.41		9.49	0.49	1.97	0.2	0.41	0.31	25.94	13.14	81.5	16.25	44.2773	45.0025	10.7201
Median	Lesser Antilles Arc	LESSER ANTILLES / LESSER ANTILLES / GRENADA	246.5	28.3202	1.98852	3.1944		47.6946	1.33564	12.0509	0.309208	2.66346	0.657201		10.717	0.463904	2.09035	0.156701	0.612916	0.372466	29.5352	9.98819	137.65	9.40452	38.4866	48.084	13.4294
Single point	Lesser Antilles Arc	LESSER ANTILLES / LESSER ANTILLES / GUADELOUPE	452	29.9211	0.12	2.50288		47.2242	0.76	7.14936	0.58	1.61796	0.27		9.40326	0.8	1.83929	0.07	0.552632	0.1	59.2105	12.7	89	8.55	25.0528	56.0542	18.893
Median	Lesser Antilles Arc	LESSER ANTILLES / LESSER ANTILLES / ST. VINCENT / LA SOUFRIERE	831	32.8735	2.4056	3.46942		51.4415	0.761337	7.92129	1.3743	3.11289	0.41861		13.8048	1.55456	1.67532	0.0704082	0.55	0.184842	46.5	19.5776	106.5	21.9606	27.308	50.4837	22.2083
Median	Lesser Antilles Arc	LESSER ANTILLES / LESSER ANTILLES / THE GRENADINES	0	26.4	0	2.5		48.4827	0.326856	11.434	0.567497	2.83444	0.0608588		11.3889	2.57247	1.78427	0.07	0.497529	0.0215253	27.9977	2.11804	69.7	8.55	36.1012	49.029	14.8698
Median	Luzon Arc	LUZON ARC / LUZON ARC / LUZON / PINATUBO	693	31.7985	0	2.5		51.7925	0.760572	8.77343	0.317315	4.60378	0.134055		12.1796	0.388645							81	5.1316	28.0397	54.595	17.3652
Median	Mexican Volcanic Belts	MEXICAN VOLCANIC BELTS / TRANS MEXICAN VOLCANIC BELT / JALISCO / AMATLAN DE CANAS VOLCANIC FIELD	1205	35.7869	0	2.5		50.1628	0.170012	7.27683	0.310242	4.79243	0.286207		11.3235	1.16164	2.11983	0.07	0.123313	0.1	27.1779	2.67457	35	3.60555	28.1129	55.2698	16.6172
Single point	Mexican Volcanic Belts	MEXICAN VOLCANIC BELTS / TRANS MEXICAN VOLCANIC BELT / JALISCO / AYUTLA	1499	38.0772	0.12	2.50288		53.9799	0.76	7.41316	0.58	6.98955	0.27		15.6957	0.8			0.909091	0.1	174.091	12.7	36	8.55	22.5112	61.097	16.3918
Median	Mexican Volcanic Belts	MEXICAN VOLCANIC BELTS / TRANS MEXICAN VOLCANIC BELT / JALISCO / LOS VOLCANES	1546	38.4433	0.634156	2.57918		56.0081	0.0593517	7.41418	0.106477	6.90425	0.468759		16.1554	2.21674							39	5.03322	21.5275	59.0538	19.4187
Median	Mexican Volcanic Belts	MEXICAN VOLCANIC BELTS / TRANS MEXICAN VOLCANIC BELT / JALISCO / MASCOTA VOLCANIC COMPLEX	1238	36.044	0	2.5		51.9523	2.23936	9.9813	3.84722	5.06511	0.457029		12.8351	1.07141	1.60563	0.07					51	13.4263	30.8213	52.6081	16.5706
Median	Mexican Volcanic Belts	MEXICAN VOLCANIC BELTS / TRANS MEXICAN VOLCANIC BELT / JALISCO / MASCOTA VOLCANIC COMPLEX	1263	36.2388	0.695575	2.59496		53.9391	0.651925	7.94395	0.690761	4.62694	0.335632		12.9996	0.853036			0.352645	0.0503564	117.163	9.88473	49	6.94751	25.7139	52.4764	21.8098
Single point	Mexican Volcanic Belts	MEXICAN VOLCANIC BELTS / TRANS MEXICAN VOLCANIC BELT / JALISCO / MASCOTA VOLCANIC COMPLEX	1336	36.8074	0.12	2.50288		56.6244	0.76	7.91009	0.58	4.84187	0.27		13.4511	0.8					135.25	12.7	42	8.55	25.5571	48.8661	25.5768
Single point	Mexican Volcanic Belts	MEXICAN VOLCANIC BELTS / TRANS MEXICAN VOLCANIC BELT / JALISCO / MASCOTA VOLCANIC COMPLEX	1521	38.2486	0.12	2.50288		55.2135	0.76	7.06571	0.58	5.45069	0.27		13.9366	0.8	1.99482	0.07	0.332021	0.1	98.4252	12.7	28	8.55	21.452	55.7798	22.7682
Single point	Mexican Volcanic Belts	MEXICAN VOLCANIC BELTS / TRANS MEXICAN VOLCANIC BELT / JALISCO / MASCOTA VOLCANIC COMPLEX	2213	43.6393	0.12	2.50288		50.8492	0.76	9.907	0.58	5.05459	0.27		14.8469	0.8	2.11842	0.07	0.356623	0.1	124.309	12.7	51	8.55	30.3585	55.2788	14.3627
Median	Mexican Volcanic Belts	MEXICAN VOLCANIC BELTS / TRANS MEXICAN VOLCANIC BELT / MEXICO	1855	40.8504	0.697122	2.59538		53.2496	0.755334	9.00992	1.14098	5.2742	0.165076		13.247	0.819524			0.853982	0.0651772	132.08	15.7538	42	1.52753	27.119	55.202	17.679
Median	Mexican Volcanic Belts	MEXICAN VOLCANIC BELTS / TRANS MEXICAN VOLCANIC BELT / MEXICO	2732	47.6823	0.441377	2.53866		52.5077	1.25407	8.12917	0.355238	4.9387	0.383462		11.5023	1.88982			0.396569	0.145319	45	45	44	9.31716	26.3965	54.5581	19.0454
Median	Mexican Volcanic Belts	MEXICAN VOLCANIC BELTS / TRANS MEXICAN VOLCANIC BELT / MEXICO	2831	48.4535	1.65761	2.99961		53.9867	1.33333	9.91343	1.29029	4.37403	0.429947		12.566	1.70007	1.82434	0.0180202	0.188889	0.160413	26.3333	14.2355	38	5.22281	30.6446	47.8998	21.4557
Median	Mexican Volcanic Belts	MEXICAN VOLCANIC BELTS / TRANS MEXICAN VOLCANIC BELT / MEXICO	1329	36.7529	0.0989463	2.50196		53.1713	1.07307	8.71978	0.465221	5.44986	0.405551		13.1256	0.627959	2.16168	0.07	0.834808	0.1	103.54	26.2861	49	4.3589	28.0431	53.0753	18.8816
Median	Mexican Volcanic Belts	MEXICAN VOLCANIC BELTS / TRANS MEXICAN VOLCANIC BELT / MEXICO	1588	38.7705	1.93894	3.16378		55.1778	0.494544	9.04404	0.0598538	4.67476	0.174408		13.2476	0.71166	2.18868	0.250092	0.644923	0.0329531	97.9181	10.8744	44	4.24264	28.2412	48.3065	23.4523
Median	Mexican Volcanic Belts	MEXICAN VOLCANIC BELTS / TRANS MEXICAN VOLCANIC BELT / MEXICO	1937	41.4892	1.11401	2.73697		53.9862	1.17886	7.88236	0.656184	6.03197	0.451814		15.2158	1.2068			1.1584	0.480482	165.076	29.5735	48	2	24.9044	55.8876	19.208
Median	Mexican Volcanic Belts	MEXICAN VOLCANIC BELTS / TRANS MEXICAN VOLCANIC BELT / MEXICO	2009.5	42.054	1.0521	2.71236		56.9011	2.5632	7.26725	0.225128	5.27043	0.198973		17.3011	1.92929	2.02222	0.07	0.7825	0.1	90.375	21.7435	29	8.55	23.7431	50.5526	25.7042
Single point	Mexican Volcanic Belts	MEXICAN VOLCANIC BELTS / TRANS MEXICAN VOLCANIC BELT / MEXICO / AMEALCO CALDERA	2385	44.9791	0.12	2.50288		50.9293	0.76	7.86204	0.58	4.76096	0.27		12.5973	0.8					47.7857	12.7	15	8.55	27.9405	55.0509	17.0085
Single point	Mexican Volcanic Belts	MEXICAN VOLCANIC BELTS / TRANS MEXICAN VOLCANIC BELT / MEXICO / AMEALCO CALDERA	2511	45.9607	0.12	2.50288		57.7271	0.76	7.34401	0.58	4.69698	0.27		17.0632	0.8					67.8333	12.7	21	8.55	23.8633	47.4838	28.6529
Single point	Mexican Volcanic Belts	MEXICAN VOLCANIC BELTS / TRANS MEXICAN VOLCANIC BELT / MEXICO / AMEALCO CALDERA	2436	45.3764	0.12	2.50288		52.9114	0.76	8.04849	0.58	6.12083	0.27		17.2851	0.8					86.2	12.7	46	8.55	26.671	57.1507	16.1783
Single point	Mexican Volcanic Belts	MEXICAN VOLCANIC BELTS / TRANS MEXICAN VOLCANIC BELT / MEXICO / CHICHINAUTZIN VOLCANIC FIELD - XITLE	2282	44.1768	0.12	2.50288		53.727	0.76	7.49329	0.58	5.06574	0.27		12.8261	0.8							22	8.55	25.9043	52.652	21.4437
Median	Mexican Volcanic Belts	MEXICAN VOLCANIC BELTS / TRANS MEXICAN VOLCANIC BELT / MEXICO / POPOCATEPETL	1942	41.5282	0.530573	2.55568		53.4897	1.62297	8.15485	0.465871	4.98841	0.375998		13.2541	1.16962	1.97929	0.101568	0.249228	0.0802957	28.5681	5.9071	30	5.06153	27.4952	52.2264	20.2784
Median	Mexican Volcanic Belts	MEXICAN VOLCANIC BELTS / TRANS MEXICAN VOLCANIC BELT / MEXICO / POPOCATEPETL	2143	43.094	1.30993	2.82239		55.3493	1.67661	7.4686	0.473163	4.78168	0.0773365		13.793	0.883575	2.18792	0.07	0.435171	0.1	57.1386	12.7	25	0	25.4127	49.9008	24.6865
Single point	Mexican Volcanic Belts	MEXICAN VOLCANIC BELTS / TRANS MEXICAN VOLCANIC BELT / MEXICO / POPOCATEPETL	2293	44.2625	0.12	2.50288		54.6531	0.76	7.46913	0.58	5.24044	0.27		13.9407	0.8	2.10526	0.07	0.334317	0.1	32.5074	12.7	27	8.55	24.9015	52.7992	22.2993
Single point	Mexican Volcanic Belts	MEXICAN VOLCANIC BELTS / TRANS MEXICAN VOLCANIC BELT / MICHOACAN	2469	45.6335	0.12	2.50288		49.7103	0.76	7.20136	0.58	5.26368	0.27		10.7898	0.8					35.8235	12.7	51	8.55	26.0805	60.4605	13.459
Median	Mexican Volcanic Belts	MEXICAN VOLCANIC BELTS / TRANS MEXICAN VOLCANIC BELT / MICHOACAN	283	28.6046	0.0875581	2.50153		51.7652	1.96267	8.0125	1.08077	4.28341	0.358472		12.216	0.25259					30.4	30.4	50	6.55744	27.9555	52.4074	19.6371
Median	Mexican Volcanic Belts	MEXICAN VOLCANIC BELTS / TRANS MEXICAN VOLCANIC BELT / MICHOACAN	448	29.8899	0.616937	2.575		52.9405	2.04537	8.24257	1.31923	4.36545	0.576197		12.5313	1.5656					65.0833	21.5668	43.5	3.53553	28.1628	51.0491	20.7881
Single point	Mexican Volcanic Belts	MEXICAN VOLCANIC BELTS / TRANS MEXICAN VOLCANIC BELT / MICHOACAN	637	31.3622	0.12	2.50288		50.5423	0.76	7.85298	0.58	5.09138	0.27		13.3768	0.8					40.0769	12.7	38	8.55	29.2713	55.7343	14.9944
Single point	Mexican Volcanic Belts	MEXICAN VOLCANIC BELTS / TRANS MEXICAN VOLCANIC BELT / MICHOACAN / MICHOACAN-GUANAJUATO VOLCANIC FIELD	2288	44.2235	0.12	2.50288		52.4867	0.76	9.38275	0.58	4.86363	0.27		12.0448	0.8					91.6667	12.7	48	8.55	29.0208	53.6813	17.2978
Median	Mexican Volcanic Belts	MEXICAN VOLCANIC BELTS / TRANS MEXICAN VOLCANIC BELT / MICHOACAN / MICHOACAN-GUANAJUATO VOLCANIC FIELD	2344.5	44.6637	0.23686	2.5112		52.9432	0.596053	8.78372	1.00752	4.1779	0.379463		12.2845	0.741878					58.8216	10.3694	40.5	17.6777	28.1629	50.6757	21.1614
Single point	Mexican Volcanic Belts	MEXICAN VOLCANIC BELTS / TRANS MEXICAN VOLCANIC BELT / MICHOACAN / MICHOACAN-GUANAJUATO VOLCANIC FIELD	488	30.2015	0.12	2.50288		50.7422	0.76	8.86185	0.58	5.14231	0.27		13.6643	0.8	1.90968	0.07	0.360714	0.1	154.643	12.7	64	8.55	28.5346	56.4543	15.011
Single point	Mexican Volcanic Belts	MEXICAN VOLCANIC BELTS / TRANS MEXICAN VOLCANIC BELT / MICHOACAN / MICHOACAN-GUANAJUATO VOLCANIC FIELD	2832	48.4613	0.12	2.50288		50.9633	0.76	8.49722	0.58	6.04225	0.27		19.2982	0.8					75.9184	12.7	79	8.55	27.2446	61.0931	11.6623
Single point	Mexican Volcanic Belts	MEXICAN VOLCANIC BELTS / TRANS MEXICAN VOLCANIC BELT / MICHOACAN / MICHOACAN-GUANAJUATO VOLCANIC FIELD - CERRITOS	1901	41.2088	0.12	2.50288		49.4929	0.76	8.03341	0.58	3.60907	0.27		14.6194	0.8							47	8.55	30.202	52.1788	17.6191
Median	Mexican Volcanic Belts	MEXICAN VOLCANIC BELTS / TRANS MEXICAN VOLCANIC BELT / MICHOACAN / MICHOACAN-GUANAJUATO VOLCANIC FIELD - EL ASTILLERO	1123	35.1482	1.55336	2.94328		52.1667	0.607271	9.1887	0.0971548	3.88345	0.0702555		11.2922	0.593014	1.64497	0.07	0.065	0.065	36.3333	12.7	43.5	0.707107	30.2153	49.2785	20.5062
Median	Mexican Volcanic Belts	MEXICAN VOLCANIC BELTS / TRANS MEXICAN VOLCANIC BELT / MICHOACAN / MICHOACAN-GUANAJUATO VOLCANIC FIELD - EL ASTILLERO	2150	43.1485	1.4213	2.87578		52.763	0.816616	8.75377	0.818463	3.9598	0.239522		11.6255	0.668152							48	3.87533	29.3646	48.8227	21.8127
Median	Mexican Volcanic Belts	MEXICAN VOLCANIC BELTS / TRANS MEXICAN VOLCANIC BELT / MICHOACAN / MICHOACAN-GUANAJUATO VOLCANIC FIELD - JORULLO	1015	34.3068	1.10052	2.73151		53.2454	0.362032	9.29085	0.962541	4.27253	0.227238		12.1364	0.679234	1.9375	0.0993468	0.318182	0.0758543	92.58	35.8247	51.5	4.90125	29.5659	49.6441	20.7901
Median	Mexican Volcanic Belts	MEXICAN VOLCANIC BELTS / TRANS MEXICAN VOLCANIC BELT / MICHOACAN / MICHOACAN-GUANAJUATO VOLCANIC FIELD - JORULLO	2597	46.6306	1.12095	2.73981		53.5043	1.00662	7.57362	0.647139	4.52434	0.113429		13.2706	1.37699	2.07565	0.135038	0.219053	0.0394041	60.6162	19.7972	44.6755	4.76705	26.0672	51.9807	21.952
Single point	Mexican Volcanic Belts	MEXICAN VOLCANIC BELTS / TRANS MEXICAN VOLCANIC BELT / MICHOACAN / ZITACUARO VOLCANIC COMPLEX	3082	50.4088	0.12	2.50288		58.2758	0.76	7.03346	0.58	5.4088	0.27		16.224	0.8					126	12.7	43	8.55	20.5071	52.2773	27.2156
Median	Mexican Volcanic Belts	MEXICAN VOLCANIC BELTS / TRANS MEXICAN VOLCANIC BELT / MORELOS / CERRO DEL AGUA	2208	43.6003	2.10982	3.27129		57.2034	0.0967601	7.75784	0.357891	4.84357	0.108795		14.8216	0.181989			0.192308	0.0201128	23.6923	2.18678	34	1	24.4463	48.6769	26.8768
Single point	Mexican Volcanic Belts	MEXICAN VOLCANIC BELTS / TRANS MEXICAN VOLCANIC BELT / MORELOS / CHICHINAUTZIN VOLCANIC FIELD	2870	48.7573	0.12	2.50288		49.7417	0.76	10.0598	0.58	2.85685	0.27		11.0504	0.8	2.07109	0.07	0.196721	0.1	22.623	12.7	42	8.55	26.7034	58.5105	14.7861
Median	Mexican Volcanic Belts	MEXICAN VOLCANIC BELTS / TRANS MEXICAN VOLCANIC BELT / MORELOS / CHICHINAUTZIN VOLCANIC FIELD	1929	41.4269	1.80561	3.08386		50.313	1.59315	8.51994	0.622332	5.31362	0.601303		12.2526	1.55269					23.3318	5.45272	30	6.9857	28.474	57.5867	13.9393
Single point	Mexican Volcanic Belts	MEXICAN VOLCANIC BELTS / TRANS MEXICAN VOLCANIC BELT / MORELOS / CHICHINAUTZIN VOLCANIC FIELD	3342	52.4342	0.12	2.50288		54.839	0.76	9.38357	0.58	4.37697	0.27		12.283	0.8	1.92982	0.07	0.527778	0.1	67.5	12.7	46	8.55	29.2601	47.422	23.3179
Median	Mexican Volcanic Belts	MEXICAN VOLCANIC BELTS / TRANS MEXICAN VOLCANIC BELT / MORELOS / CHICHINAUTZIN VOLCANIC FIELD	1462.5	37.7929	0.531504	2.55587		50.4341	1.31431	8.32682	0.499193	5.05229	0.207959		12.7457	1.22388					31.3722	16.1613	31.5	4.94072	29.1064	55.5892	15.3044
Median	Mexican Volcanic Belts	MEXICAN VOLCANIC BELTS / TRANS MEXICAN VOLCANIC BELT / MORELOS / CHICHINAUTZIN VOLCANIC FIELD	874	33.2085	0	2.5		51.8091	0.040295	7.4892	0.260875	5.35177	0.0576774		12.973	0.306658	2.00365	0.07	0.142857	0.1	17.2562	0.984562	35	8.55	26.4333	55.8249	17.7418
Median	Mexican Volcanic Belts	MEXICAN VOLCANIC BELTS / TRANS MEXICAN VOLCANIC BELT / MORELOS / CHICHINAUTZIN VOLCANIC FIELD	1213	35.8493	0.302241	2.5182		52.2902	2.71406	8.35022	0.665397	5.44704	0.678191		13.3787	2.39506	2.01688	0.07	0.158273	0.1	25.8273	25.83	36	6.65833	28.2245	53.832	17.9434
Median	Mexican Volcanic Belts	MEXICAN VOLCANIC BELTS / TRANS MEXICAN VOLCANIC BELT / MORELOS / CHICHINAUTZIN VOLCANIC FIELD	3633	54.7011	1.13571	2.74588		55.1433	1.20772	7.28537	0.738423	5.40622	0.279647		13.3967	0.74406	2.27933	0.0794778	0.475593	0.0584989	74.6	13.3391	32.84	4.33235	23.6496	53.8822	22.4682
Median	Mexican Volcanic Belts	MEXICAN VOLCANIC BELTS / TRANS MEXICAN VOLCANIC BELT / MORELOS / CHICHINAUTZIN VOLCANIC FIELD	1589	38.7783	1.54353	2.93811		53.2695	1.51607	7.63903	0.956336	5.94826	0.174495		14.2683	1.03368					23.875	5.14007	26	2.64575	25.3566	57.2638	17.3796
Median	Mexican Volcanic Belts	MEXICAN VOLCANIC BELTS / TRANS MEXICAN VOLCANIC BELT / MORELOS / CHICHINAUTZIN VOLCANIC FIELD	2625	46.8487	0	2.5		56.7857	0.0752176	7.11066	0.145835	5.77643	0.718339		14.6443	1.44048	1.96482	0.07	0.517857	0.1	62.75	10.7581	30	8.48528	22.8127	53.0714	24.1159
Median	Mexican Volcanic Belts	MEXICAN VOLCANIC BELTS / TRANS MEXICAN VOLCANIC BELT / MORELOS / CHICHINAUTZIN VOLCANIC FIELD	1105	35.0079	0.62338	2.57655		54.7698	1.5185	7.97299	0.405835	4.92596	0.280778		15.2165	0.796137	1.94845	0.0718315	1	0.370307	157.292	54.6698	39	8.55	24.9007	52.6878	22.4115
Median	Mexican Volcanic Belts	MEXICAN VOLCANIC BELTS / TRANS MEXICAN VOLCANIC BELT / MORELOS / CHICHINAUTZIN VOLCANIC FIELD	1678	39.4716	0.727104	2.60359		56.5202	0.197129	7.49906	0.510872	5.58158	0.164899		15.6001	1.54943	2.21373	0.113692	0.893021	0.00242714	145.266	8.60098			22.9039	52.8664	24.2297
Median	Mexican Volcanic Belts	MEXICAN VOLCANIC BELTS / TRANS MEXICAN VOLCANIC BELT / MORELOS / CHICHINAUTZIN VOLCANIC FIELD	2671	47.2071	2.35758	3.4363		52.4296	0.42873	7.1944	0.140378	5.61194	0.106777		12.9641	0.479099					17.3135	2.53393	23.5	12.0208	25.8778	56.4374	17.6848
Median	Mexican Volcanic Belts	MEXICAN VOLCANIC BELTS / TRANS MEXICAN VOLCANIC BELT / MORELOS / CHICHINAUTZIN VOLCANIC FIELD	3075.5	50.3581	1.24718	2.79382		53.0855	0.844842	7.78277	1.23551	5.30794	0.350697		13.0959	0.981585					19.4545	5.73046	31.5	3.83695	26.0967	54.4604	19.4429
Median	Mexican Volcanic Belts	MEXICAN VOLCANIC BELTS / TRANS MEXICAN VOLCANIC BELT / MORELOS / CHICHINAUTZIN VOLCANIC FIELD	3027	49.9803	0.118492	2.50281		52.0812	2.16048	8.27777	1.03737	5.741	0.581596		14.3204	1.25951							36	16.9027	27.395	55.9144	16.6906
Median	Mexican Volcanic Belts	MEXICAN VOLCANIC BELTS / TRANS MEXICAN VOLCANIC BELT / MORELOS / CHICHINAUTZIN VOLCANIC FIELD - TEPEZINGO	2755.5	47.8653	0.952947	2.67546		55.3394	0.738921	7.21014	0.245767	5.77411	0.0664227		14.1377	1.63505					60.8833	37.7831	32.5	2.12132	23.3148	55.4177	21.2675
Median	Mexican Volcanic Belts	MEXICAN VOLCANIC BELTS / TRANS MEXICAN VOLCANIC BELT / MORELOS / CHICHINAUTZIN VOLCANIC FIELD - XITLE	2910	49.0689	0	2.5		52.2253	0.856845	8.1643	0.300812	5.71371	0.132998		13.1414	0.517133					13.72	2.12224	29	3.60555	27.5626	56.3338	16.1036
Single point	Mexican Volcanic Belts	MEXICAN VOLCANIC BELTS / TRANS MEXICAN VOLCANIC BELT / PUEBLA / ACOCULCO CALDERA	2960	49.4584	0.12	2.50288		50.1025	0.76	7.12178	0.58	4.52113	0.27		10.8727	0.8					12.3129	12.31	31	8.55	27.1793	55.9435	16.8771
Single point	Mexican Volcanic Belts	MEXICAN VOLCANIC BELTS / TRANS MEXICAN VOLCANIC BELT / PUEBLA / PICO DE ORIZABA (=VOLCAN CITLALTEPETL)	2456	45.5322	0.12	2.50288		54.5721	0.76	7.68282	0.58	4.31782	0.27		7.9128	0.8	1.85946	0.07	1.47778	0.1	97.3333	12.7	37	8.55	26.33	49.2995	24.3706
Median	Mexican Volcanic Belts	MEXICAN VOLCANIC BELTS / TRANS MEXICAN VOLCANIC BELT / PUEBLA / PICO DE ORIZABA (=VOLCAN CITLALTEPETL)	2533.5	46.136	0.00550836	2.50001		50.513	0.368812	9.60334	0.0029345	3.85339	0.173932		8.18024	1.47338	1.93367	0.0120653	0.246087	0.00860826	77.4469	3.30325	58	7.07107	33.0537	49.6277	17.3186
Single point	New Hebrides Arc Vanuatu Archipelago	NEW HEBRIDES ARC - VANUATU ARCHIPELAGO / BANKS ISLANDS / GAUA (SANTA MARIA) / GAUA (SANTA MARIA)	527	30.5053	0.12	2.50288		47.1228	0.76	15.0061	0.58	2.67385	0.27		10.3322	0.8			0.224	0.1	65.6667	12.7	103	8.55	49.5811	42.3231	8.09581
Single point	New Hebrides Arc Vanuatu Archipelago	NEW HEBRIDES ARC - VANUATU ARCHIPELAGO / BANKS ISLANDS / MERE LAVA	549	30.6767	0.12	2.50288		51.849	0.76	11.7586	0.58	2.04893	0.27		9.98644	0.8	1.47826	0.07	0.338235	0.1	185.294	12.7	99	8.55	36.1051	41.9517	21.9431
Median	New Hebrides Arc Vanuatu Archipelago	NEW HEBRIDES ARC - VANUATU ARCHIPELAGO / BANKS ISLANDS / MOTA)	114	27.2881	0	2.5		49.1209	0.0123426	7.51291	0.517141	3.05072	0.148154		11.0059	0.119185	1.66832	0.0157998	0.587401	0.000140299	190.962	17.2708			30.0687	51.712	18.2193
Median	New Hebrides Arc Vanuatu Archipelago	NEW HEBRIDES ARC - VANUATU ARCHIPELAGO / CENTRAL NEW HEBRIDES ARC	129	27.4049	0.490234	2.54761		47.6292	0.429413	7.22098	0.206796	3.0858	0.217651		9.56742	0.409372	1.96715	0.0464523	1.16435	0.0881238	387.116	81.7165	253	24.9065	29.4839	54.6698	15.8463
Median	New Hebrides Arc Vanuatu Archipelago	NEW HEBRIDES ARC - VANUATU ARCHIPELAGO / CENTRAL NEW HEBRIDES ARC / AOBA (=AMBAE) / AOBA (=AMBAE)	1387	37.2047	0	2.5		49.4895	0.572078	9.98638	1.69048	3.68012	0.468367		10.3382	0.465421	1.84848	0.109265	1.35714	0.493042	246.429	95.805			34.4044	51.6004	13.9951
Median	New Hebrides Arc Vanuatu Archipelago	NEW HEBRIDES ARC - VANUATU ARCHIPELAGO / CENTRAL NEW HEBRIDES ARC / EFATE / MOUNT FATMALAPA / MAINLAND SUITE	428	29.7341	0	2.5		45.9929	0.0578878	8.63733	0.638852	2.15298	0.15014		8.03626	0.712217	2.15464	0.07	1.4186	0.1					33.9909	51.902	14.1071
Single point	New Hebrides Arc Vanuatu Archipelago	NEW HEBRIDES ARC - VANUATU ARCHIPELAGO / CENTRAL NEW HEBRIDES ARC / EPI / EAST EPI	289	28.6513	0.12	2.50288		50.6747	0.76	8.0651	0.58	3.33519	0.27		10.9724	0.8	1.73427	0.07	0.717241	0.1	135.172	12.7	159	8.55	28.6062	52.432	18.9617
Single point	New Hebrides Arc Vanuatu Archipelago	NEW HEBRIDES ARC - VANUATU ARCHIPELAGO / CENTRAL NEW HEBRIDES ARC / TONGOA / TONGOA	235	28.2306	0.12	2.50288		49.0682	0.76	9.42102	0.58	2.32743	0.27		6.96999	0.8	1.88636	0.07	0.964286	0.1	198.214	12.7	129	8.55	33.8542	49.3939	16.7519
Single point	New Hebrides Arc Vanuatu Archipelago	NEW HEBRIDES ARC - VANUATU ARCHIPELAGO / SOUTHERN NEW HEBRIDES ARC / ANATOM (ANEITYUM) / ANATOM (ANEITYUM)	358	29.1888	0.12	2.50288		49.858	0.76	7.3148	0.58	3.03519	0.27		9.16058	0.8	1.90604	0.07	0.723684	0.1	165.789	12.7	145	8.55	27.8436	53.1494	19.0069
Single point	New Hebrides Arc Vanuatu Archipelago	NEW HEBRIDES ARC - VANUATU ARCHIPELAGO / SOUTHERN NEW HEBRIDES ARC / ERROMANGO / MOUNT RANTOP	319	28.885	0.12	2.50288		49.1482	0.76	7.57228	0.58	2.69123	0.27		8.95802	0.8							141	8.55	28.1425	53.2625	18.5951
Single point	New Hebrides Arc Vanuatu Archipelago	NEW HEBRIDES ARC - VANUATU ARCHIPELAGO / SOUTHERN NEW HEBRIDES ARC / FUTUNA	582	30.9338	0.12	2.50288		51.8079	0.76	10.755	0.58	3.14782	0.27		10.1222	0.8	1.67416	0.07	0.222417	0.1	15.5867	12.7	64	8.55	33.0034	46.4928	20.5037
Median	New Hebrides Arc Vanuatu Archipelago	NEW HEBRIDES ARC - VANUATU ARCHIPELAGO / SOUTHERN NEW HEBRIDES ARC / LOPEVI	251	28.3553	1.73395	3.04246		50.0628	0.565655	8.27355	0.601983	2.60265	0.0599168		9.00859	0.199206	1.59004	0.076652	0.504806	0.0329805	117.242	15.2725	118.5	16.0624	28.9185	50.9719	20.1097
Median	New Hebrides Arc Vanuatu Archipelago	NEW HEBRIDES ARC - VANUATU ARCHIPELAGO / SOUTHERN NEW HEBRIDES ARC / TANNA (=TANUA) / YASUR(=YASOWA)	113	27.2803	0	2.5		48.0783	3.25745	9.58321	1.2768	2.23101	1.70215		6.91395	2.58296	1.69725	0.0856095	1.5	0.316426					34.4886	49.3465	16.1649
Single point	Ryukyu Arc	RYUKYU ARC / RYUKYU ARC / KYUSHU / AIRA	49	26.7817	0.12	2.50288		53.9989	0.76	7.93017	0.58	4.21663	0.27		13.136	0.8					14.3607	12.7	55.415	8.55	25.8286	50.4615	23.7099
Median	Ryukyu Arc	RYUKYU ARC / RYUKYU ARC / KYUSHU / YONEMARU	84	27.0544	0	2.5		47.2116	0.538673	7.0361	0.0446023	2.05661	0.0556901		10.1128	0.774078	1.75837	0.0439827	0.651803	0.173087					30.3433	50.7799	18.8768
Median	Solomon Island Arc	SOLOMON ISLAND ARC / SOLOMON ISLAND ARC - WESTERN PROVINCE / NEW GEORGIA ISLANDS - KOLO CALDERA	636	31.3544	0	2.5		49.4184	0.446807	12.2021	2.61527	3.46456	0.246784		9.74477	0.174753	1.71711	0.127444			56.7775	2.09781	50	12.7671	42.2812	43.6199	14.0989
Single point	Sunda Arc	SUNDA ARC / ANDAMAN ARC / BURMA (MYANMAR) / MONYWA	83	27.0466	0.12	2.50288		48.0534	0.76	11.3808	0.58	3.11022	0.27		10.6599	0.8			1.29032	0.1	129.032	12.7	73	8.55	36.6969	49.3737	13.9294
Median	Sunda Arc	SUNDA ARC / ANDAMAN ARC / BURMA (MYANMAR) / MONYWA	124	27.366	0.150315	2.50451		48.3329	0.618966	9.48934	0.580543	3.52021	0.51949		11.0347	0.896661					156.429	56.1809	77	14.2244	31.4721	55.1909	13.337
Single point	Sunda Arc	SUNDA ARC / ANDAMAN ARC / BURMA (MYANMAR) / MOUNT POPA	665	31.5803	0.12	2.50288		53.2252	0.76	7.8093	0.58	3.49969	0.27		10.2928	0.8			1.57895	0.1	120.789	12.7	105	8.55	24.5211	51.4732	24.0057
Median	Sunda Arc	SUNDA ARC / SUNDA ARC / JAVA / GALUNGGUNG	1613	38.9653	0	2.5		49.379	1.29988	10.412	1.37072	2.58534	0.415706		10.9026	0.548473					8.16667	4.12027			34.2186	47.5576	18.2237
Median	Sunda Arc	SUNDA ARC / SUNDA ARC / JAVA / LAMONGAN	603	31.0974	0	2.5		45.9363	0.506635	8.72959	1.8114	2.54273	0.549363		8.59831	0.34228			1.51515	0.1	94.8864	18.2206	83	12.8167	34.3805	52.3607	13.2589
Median	Sunda Arc	SUNDA ARC / SUNDA ARC / JAVA / SLAMET	2023	42.1592	0	2.5		50.6562	0.284201	7.60058	0.293751	3.94477	0.185856		12.2529	1.70685	1.77736	0.0387907	0.426982	0.0377664	28.1748	7.15048	120.5	22.7797	28.187	53.8679	17.945
Median	Sunda Arc	SUNDA ARC / SUNDA ARC / SUMBAWA / TAMBORA	2028	42.1981	0	2.5		52.2123	0.254751	7.96857	1.26733	3.58403	0.416184		12.1999	0.807657	1.74175	0.020468	0.768197	0.464393	52.1175	28.9464			27.4665	50.732	21.8016
Median	Tonga Arc	TONGA ARC / TONGA ISLANDS / ATA	65	26.9063	0	2.5		50.9618	0.763577	7.38458	0.213539	2.08102	0.128694		9.13222	0.109823	1.64911	0.0359705	1.06	0.121933	345.036	41.1764	81	22.1889	27.6538	48.103	24.2432
Median	Tonga Arc	TONGA ARC / TONGA ISLANDS / TAFAHI	135	27.4517	0	2.5		52.2284	0.467413	7.58741	0.466996	1.38093	0.089523		9.28336	0.401311	1.42462	0.0173505	0.275584	0.0340133	106.08	12.805			28.996	42.1904	28.8135

## Sheet: references
References:
[6985] MORTAZAVI M., SPARKS R. S. J.: ORIGIN OF RHYOLITE AND RHYODACITE LAVAS AND ASSOCIATED MAFIC INCLUSIONS OF CAPE AKROTIRI, SANTORINI: THE ROLE OF WET BASALT IN GENERATING CALCALKALINE SILICIC MAGMAS CONTRIB. MINERAL. PETROL. 146 [2004] 397-413 doi: 10.1007/s00410-003-0508-4
[10187] ZELLMER G. F., TURNER SIMON P.: ARC DACITE GENESIS PATHWAYS: EVIDENCE FROM MAFIC ENCLAVES AND THEIR HOSTS IN AEGEAN LAVAS LITHOS 95 [2007] 346-362 GeoReM-id: 3256 doi: 10.1016/j.lithos.2006.08.002
[13283] BAILEY J. C., JENSEN E. S., HANSEN A., KANN A. D. J., KANN K.: FORMATION OF HETEROGENEOUS MAGMATIC SERIES BENEATH NORTH SANTORINI, SOUTH AEGEAN ISLAND ARC LITHOS 110 [2009] 20-36 GeoReM-id: 4486 doi: 10.1016/j.lithos.2008.12.002
[13432] VAGGELLI G., PELLEGRINI M., VOUGIOUKALAKIS G. E., INNOCENTI F., FRANCALANCI L.: HIGHLY SR RADIOGENIC THOLEIITIC MAGMAS IN THE LATEST INTER-PLINIAN ACTIVITY OF SANTORINI VOLCANO, GREECE J. GEOPHYS. RES. B114 [2009] doi: 10.1029/2008JB005936
[19377] RIZZO A. L., BARBERI F., CARAPEZZA M. L., DI PIAZZA A., FRANCALANCI L., SORTINO F., D^ALESSANDRO W.: NEW MAFIC MAGMA REFILLING A QUIESCENT VOLCANO: EVIDENCE FROM HE-NE-AR ISOTOPES DURING THE 2011-2012 UNREST AT SANTORINI, GREECE GEOCHEMISTRY GEOPHYSICS GEOSYSTEMS 16 [2015] 798-814 doi: 10.1002/2014GC005653
[21969] WOELKI D., HAASE K. M., SCHOENHOFEN M. V., BEIER C., REGELOUS M., KRUMM S. H., G‹NTHER T.: EVIDENCE FOR MELTING OF SUBDUCTING CARBONATE-RICH SEDIMENTS IN THE WESTERN AEGEAN ARC CHEM. GEOL. 483 [2018] 463-473 GeoReM-id: 11476 doi: 10.1016/j.chemgeo.2018.03.014
[23770] ELBURG M. A., SMET I.: GEOCHEMISTRY OF LAVAS FROM AEGINA AND POROS (AEGEAN ARC, GREECE): DISTINGUISHING UPPER CRUSTAL CONTAMINATION AND SOURCE CONTAMINATION IN THE SARONIC GULF AREA LITHOS 358-359 (105416) [2020] doi: 10.1016/j.lithos.2020.105416
[4994] KELLER J.: PETROLOGY OF SOME VOLCANIC ROCK SERIES OF THE AEOLIAN ARC, SOUTHERN TYRRHENIAN SEA: CALC-ALKALINE AND SHOSHONITIC ASSOCIATIONS CONTRIB. MINERAL. PETROL. 46 [1974] 29-47 doi: 10.1007/BF00377991
[5056] FRANCALANCI L., TOMMASINI S., CONTICELLI S., DAVIES G. R.: SR ISOTOPE EVIDENCE FOR SHORT MAGMA RESIDENCE TIME FOR THE 20TH CENTURY AT STROMBOLI VOLCANO, ITALY EARTH PLANET. SCI. LETT. 167 [1999] 61-69 doi: 10.1016/S0012-821X(99)00013-8
[6814] FRANCALANCI L., TOMMASINI S., CONTICELLI S.: THE VOLCANIC ACTIVITY OF STROMBOLI IN THE 1906-1908 AD PERIOD: MINERALOGICAL, GEOCHEMICAL AND ISOTOPE DATA RELEVANT TO THE UNDERSTANDING OF THE PLUMBING SYSTEM J. VOLCANOL. GEOTHERM. RES. 131 [2004] 179-211 doi: 10.1016/S0377-0273(03)00362-7
[9378] LAIOLO M., CIGOLINI C.: MAFIC AND ULTRAMAFIC XENOLITHS IN SAN BARTOLO LAVA FIELD: NEW INSIGHTS ON THE ASCENT AND STORAGE OF STROMBOLI MAGMAS BULL. VOLCANOL. 68 [2006] 653-670 doi: 10.1007/s00445-005-0040-7
[11126] TOMMASINI S., HEUMANN A., AVANZINELLI R., FRANCALANCI L.: THE FATE OF HIGH-ANGLE DIPPING SLABS IN THE SUBDUCTION FACTORY: AN INTEGRATED TRACE ELEMENT AND RADIOGENIC ISOTOPE (U, TH, SR, ND, PB) STUDY OF STROMBOLI VOLCANO, AEOLIAN ARC, ITALY J. PETROL. 48 [2007] 2407-2430 GeoReM-id: 3468 doi: 10.1093/petrology/egm066
[12014] CORAZZATO C., FRANCALANCI L., MENNA M., PETRONE C. M., RENZULLI A., TIBALDI A. M., VEZZOLI L. M.: WHAT CONTROLS SHEET INTRUSION IN VOLCANOES? STRUCTURE AND PETROLOGY OF THE STROMBOLI SHEET COMPLEX, ITALY J. VOLCANOL. GEOTHERM. RES. 173 [2008] 26-54 doi: 10.1016/j.jvolgeores.2008.01.006
[16073] POMPILIO M., BERTAGNINI A., METRICH N.: GEOCHEMICAL HETEROGENEITIES AND DYNAMICS OF MAGMAS WITHIN THE PLUMBING SYSTEM OF A PERSISTENTLY ACTIVE VOLCANO: EVIDENCE FROM STROMBOLI BULL. VOLCANOL. 74 [2012] 881-894 doi: 10.1007/s00445-011-0571-z
[23777] DI STEFANO F., MOLLO S., UBIDE T., PETRONE C. M., CAULFIELD J. T., SCARLATO P., NAZZARI M., ANDRONICO D., DEL BELLO E.: MUSH CANNIBALISM AND DISRUPTION RECORDED BY CLINOPYROXENE PHENOCRYSTS AT STROMBOLI VOLCANO: NEW INSIGHTS FROM RECENT 2003-2017 ACTIVITY LITHOS 360-361 (105440) [2020] doi: 10.1016/j.lithos.2020.105440
[2195] TURNER SIMON P., MCDERMOTT F., HAWKESWORTH C. J., KEPEZHINSKAS P. K.: A U-SERIES STUDY OF LAVAS FROM KAMCHATKA AND THE ALEUTIANS: CONSTRAINTS ON SOURCE COMPOSITION AND MELTING PROCESSES CONTRIB. MINERAL. PETROL. 133 [1998] 217-234 doi: 10.1007/s004100050449
[4190] NOLL P. D. JR., NEWSOM H. E., LEEMAN W. P., RYAN J. G.: THE ROLE OF HYDROTHERMAL FLUIDS IN THE PRODUCTION OF SUBDUCTION ZONE MAGMAS: EVIDENCE FROM SIDEROPHILE AND CHALCOPHILE TRACE ELEMENTS AND BORON GEOCHIM. COSMOCHIM. ACTA 60 [1996] 587-611 doi: 10.1016/0016-7037(95)00405-X
[6565] GEORGE R. M. M., TURNER SIMON P., HAWKESWORTH C. J., MORRIS J. D., NYE C. J., RYAN J. G., ZHENG S.-H.: MELTING PROCESSES AND FLUID AND SEDIMENT TRANSPORT RATES ALONG THE ALASKA-ALEUTIAN ARC FROM AN INTEGRATED U-TH-RA-BE ISOTOPE STUDY J. GEOPHYS. RES. B108 [2003] doi: 10.1029/2002JB001916
[6992] HILDRETH W., FIERSTEIN J. E., SIEMS D. F., BUDAHN J. R., RUIZ J.: REAR-ARC VS. ARC-FRONT VOLCANOES IN THE KATMAI REACH OF THE ALASKA PENINSULA: A CRITICAL APPRAISAL OF ACROSS-ARC COMPOSITIONAL VARIATIONS CONTRIB. MINERAL. PETROL. 147 [2004] 243-275 doi: 10.1007/s00410-004-0558-2
[8317] KIENLE J., KYLE P. R., SELF S., MOTYKA R. J., LORENZ V.: UKINREK MAARS, ALASKA, I. APRIL 1977 ERUPTION SEQUENCE, PETROLOGY AND TECTONIC SETTING J. VOLCANOL. GEOTHERM. RES. 7 [1980] 11-37 doi: 10.1016/0377-0273(80)90018-9
[9411] JICHA B. R., SINGER B. S.: VOLCANIC HISTORY AND MAGMATIC EVOLUTION OF SEGUAM ISLAND, ALEUTIAN ISLAND ARC, ALASKA BULL. GEOL. SOC. AM. 118 [2006] 805-822 doi: 10.1130/B25861.1
[12881] AYUSO R. A., HAEUSSLER P. J., BRADLEY D. C., FARRIS D. W., FOLEY N. K., WANDLESS G. A.: THE ROLE OF RIDGE SUBDUCTION IN DETERMINING THE GEOCHEMISTRY AND ND-SR-PB ISOTOPIC EVOLUTION OF THE KODIAK BATHOLITH IN SOUTHERN ALASKA TECTONOPHYSICS 464 [2009] 137-163 doi: 10.1016/j.tecto.2008.09.029
[16078] JICHA B. R., COOMBS M. L., CALVERT A. T., SINGER B. S.: GEOLOGY AND 40AR/39AR GEOCHRONOLOGY OF THE MEDIUM- TO HIGH-K TANAGA VOLCANIC CLUSTER, WESTERN ALEUTIANS BULL. GEOL. SOC. AM. 124 [2012] 842-856 doi: 10.1130/B30472.1
[19452] YOGODZINSKI G. M., BROWN S. T., KELEMEN P. B., VERVOORT J. D., PORTNYAGIN M. V., SIMS K. W. W., HOERNLE K. A., JICHA B. R., WERNER R.: THE ROLE OF SUBDUCTED BASALT IN THE SOURCE OF ISLAND ARC MAGMAS: EVIDENCE FROM SEAFLOOR LAVAS OF THE WESTERN ALEUTIANS J. PETROL. 56 [2015] 441-492 GeoReM-id: 8576 doi: 10.1093/petrology/egv006
[20239] SCHAEN A. J., JICHA B. R., KAY S. M., SINGER B. S., TIBBETTS A. K.: EOCENE TO PLEISTOCENE MAGMATIC EVOLUTION OF THE DELAROF ISLANDS, ALEUTIAN ARC GEOCHEMISTRY GEOPHYSICS GEOSYSTEMS 17 [2016] 1086-1108 GeoReM-id: 9896 doi: 10.1002/2015GC006067
[21215] YOGODZINSKI G. M., KELEMEN P. B., HOERNLE K. A., BROWN S. T., BINDEMAN I. N., VERVOORT J. D., SIMS K. W. W., PORTNYAGIN M. V., WERNER R.: SR AND O ISOTOPES IN WESTERN ALEUTIAN SEAFLOOR LAVAS: IMPLICATIONS FOR THE SOURCE OF FLUIDS AND TRACE ELEMENT CHARACTER OF ARC VOLCANIC ROCKS EARTH PLANET. SCI. LETT. 475 [2017] 169-180 doi: 10.1016/j.epsl.2017.07.007
[22260] JICHA B. R., KAY S. M.: QUANTIFYING ARC MIGRATION AND THE ROLE OF FOREARC SUBDUCTION EROSION IN THE CENTRAL ALEUTIANS J. VOLCANOL. GEOTHERM. RES. 360 [2018] 84-99 doi: 10.1016/j.jvolgeores.2018.06.016
[23519] LOEWEN M. W, IZBEKOV P., MOSHREFZADEH J., COOMBS M. L., LARSEN J. F., GRAHAM N., HARBIN M, WAYTHOMAS C. F., WALLACE K.: PETROLOGY OF THE 2016-2017 ERUPTION OF BOGOSLOF ISLAND, ALASKA BULL. VOLCANOL. 81 (72) [2019] doi: 10.1007/s00445-019-1333-6
[24809] BEZARD R., HOERNLE K. A., PFƒNDER J. A., JICHA B. R., WERNER R., HAUFF F., PORTNYAGIN M. V., SPERNER B., YOGODZINSKI G. M., TURNER SIMON P.: 40AR/39AR AGES AND BULK-ROCK CHEMISTRY OF THE LOWER SUBMARINE UNITS OF THE CENTRAL AND WESTERN ALEUTIAN ARC LITHOS 392-393 (106147) [2021] doi: 10.1016/j.lithos.2021.106147
[3831] HICKEY-VARGAS R., MORENO-ROA HUGO, LOPEZ-ESCOBAR L., FREY F. A.: GEOCHEMICAL VARIATIONS IN ANDEAN BASALTIC AND SILICIC LAVAS FROM THE VILLARICA-LANIN VOLCANIC CHAIN (39.5∞S): AN EVALUATION OF SOURCE HETEROGENEITY, FRACTIONAL CRYSTALLIZATION, AND CRUSTAL ASSIMILATION CONTRIB. MINERAL. PETROL. 103 [1989] 361-386 doi: 10.1007/BF00402922
[3996] TORMEY D. R., HICKEY-VARGAS R., FREY F. A., LOPEZ-ESCOBAR L.: RECENT LAVAS FROM THE ANDEAN VOLCANIC FRONT (33 TO 42∞S); INTERPRETATIONS OF ALONG-ARC COMPOSITIONAL VARIATIONS SPEC. PAP. GEOL. SOC. AM. 265 [1991] 57-77 doi: 10.1130/SPE265-p57
[4350] LOPEZ-ESCOBAR L., PARADA M. A., HICKEY-VARGAS R., FREY F. A., KEMPTON P. D., MORENO-ROA HUGO: CALBUCO VOLCANO AND MINOR ERUPTIVE CENTERS DISTRIBUTED ALONG THE LIQUINE-OFQUI FAULT ZONE, CHILE (41∞ - 42∞ S): CONTRASTING ORIGIN OF ANDESITIC AND BASALTIC MAGMA IN THE SOUTHERN VOLCANIC ZONE OF THE ANDES CONTRIB. MINERAL. PETROL. 119 [1995] 345-361 doi: 10.1007/BF00286934
[4889] SCHREIBER U., SCHWAB K.: GEOCHEMISTRY OF QUATERNARY SHOSHONITIC LAVAS RELATED TO THE CALAMA-OLACAPATO-EL TORO LINEAMENT, NW ARGENTINA J. S. AMER. EARTH SCI. 4 [1991] 73-85 doi: 10.1016/0895-9811(91)90019-H
[5180] COSTA F. G., SINGER B. S.: EVOLUTION OF HOLOCENE DACITE AND COMPOSITIONALLY ZONED MAGMA, VOLCAN SAN PEDRO, SOUTHERN VOLCANIC ZONE, CHILE J. PETROL. 43 [2002] 1571-1593 doi: 10.1093/petrology/43.8.1571
[7318] LOPEZ-ESCOBAR L., CEMBRANO J., MORENO H.: GEOCHEMISTRY AND TECTONICS OF THE CHILEAN SOUTHERN ANDES BASALTIC QUATERNARY VOLCANISM (37-46∞S) REV. GEOL. CHILE 22 [1995] 219-234 doi: 10.5027/andgeoV22n2-a06
[17669] RISSE A., TRUMBULL R. B., KAY S. M., COIRA B. L., ROMER R. L.: MULTI-STAGE EVOLUTION OF LATE NEOGENE MANTLE-DERIVED MAGMAS FROM THE CENTRAL ANDES BACK-ARC IN THE SOUTHERN PUNA PLATEAU OF ARGENTINA J. PETROL. 54 [2013] 1963-1995 GeoReM-id: 7469 doi: 10.1093/PETROLOGY/EGT038
[19324] BEGUELIN P., CHIARADIA M., BEATE B., SPIKINGS R. A.: THE YANAURCU VOLCANO (WESTERN CORDILLERA, ECUADOR): A FIELD, PETROGRAPHIC, GEOCHEMICAL, ISOTOPIC AND GEOCHRONOLOGICAL STUDY LITHOS 218-219 [2015] 37-53 doi: 10.1016/j.lithos.2015.01.014
[19945] BUCCHI F., LARA L. E., GUTIERREZ F. J.: THE CARRAN-LOS VENADOS VOLCANIC FIELD AND ITS RELATIONSHIP WITH COEVAL AND NEARBY POLYGENETIC VOLCANISM IN AN INTRA-ARC SETTING J. VOLCANOL. GEOTHERM. RES. 308 [2015] 70-81 doi: 10.1016/j.jvolgeores.2015.10.013
[20346] HICKEY-VARGAS R., SUN MURONG, HOLBIK S.: GEOCHEMISTRY OF BASALTS FROM SMALL ERUPTIVE CENTERS NEAR VILLARRICA STRATOVOLCANO, CHILE: EVIDENCE FOR LITHOSPHERIC MANTLE COMPONENTS IN CONTINENTAL ARC MAGMAS GEOCHIM. COSMOCHIM. ACTA 185 [2016] 358-382 doi: 10.1016/j.gca.2016.03.033
[20676] RAWSON H., KELLER T., FONTIJN K., PYLE D. M., MATHER T. A., SMITH V. C., NARANJO J. A.: COMPOSITIONAL VARIABILITY IN MAFIC ARC MAGMAS OVER SHORT SPATIAL AND TEMPORAL SCALES: EVIDENCE FOR THE SIGNATURE OF MANTLE REACTIVE MELT CHANNELS EARTH PLANET. SCI. LETT. 456 [2016] 66-77 doi: 10.1016/j.epsl.2016.09.056
[21041] MCGEE L. E., BRAHM R., ROWE M. C., HANDLEY H. K., MORGADO E., LARA L. E., TURNER M. B., VINET N., PARADA M. A., VALDIVIA P.: A GEOCHEMICAL APPROACH TO DISTINGUISHING COMPETING TECTONO-MAGMATIC PROCESSES PRESERVED IN SMALL ERUPTIVE CENTRES CONTRIB. MINERAL. PETROL. 172 (44) [2017] GeoReM-id: 10522 doi: 10.1007/s00410-017-1360-2
[21645] MARTINEZ P., SINGER B. S., MORENO-ROA HUGO, JICHA B. R.: VOLCANOLOGIC AND PETROLOGIC EVOLUTION OF ANTUCO-SIERRA VELLUDA, SOUTHERN ANDES, CHILE J. VOLCANOL. GEOTHERM. RES. 349 [2018] 392-408 doi: 10.1016/j.jvolgeores.2017.11.026
[23134] AUWERA J. V., GODWIN C. I., DUTRIEUX A., WILKINSON C. M., GANEROD M., COUMONT V., BOLLE O.: MANTLE MELTING AND MAGMATIC PROCESSES UNDER LA PICADA STRATOVOLCANO (CSVZ, CHILE) J. PETROL. 60 [2019] 907-944 doi: 10.1093/petrology/egz020
[23433] MCGEE L. E., MORGADO E., DAMASCENO D., PARADA M. A., LICHTENSTEIN U., LARA L. E., FLORES A., TURNER M. B., HANDLEY H. K., NOWELL G. M.: STRATIGRAPHICALLY CONTROLLED SAMPLING CAPTURES THE ONSET OF HIGHLY FLUID-FLUXED MELTING AT SAN JORGE VOLCANO, SOUTHERN VOLCANIC ZONE, CHILE CONTRIB. MINERAL. PETROL. 174 (102) [2019] GeoReM-id: 11803 doi: 10.1007/s00410-019-1643-x
[23710] BELLVER-BACA M. T., CHIARADIA M., BEATE B., CARDENAS D., DERIAZ B., MENDEZ-CHAZARRA N., VILLAGOMEZ D.: GEOCHEMICAL EVOLUTION OF THE QUATERNARY CHACHIMBIRO VOLCANIC COMPLEX (FRONTAL VOLCANIC ARC OF ECUADOR) LITHOS 356-357 (105237) [2020] doi: 10.1016/j.lithos.2019.105237
[24044] MEIXNER A., SARCHI C., LUCASSEN F., BECCHIO R. A., CAFFE P. J., LINDSAY J. M., ROSNER M., KASEMANN S. A.: LITHIUM CONCENTRATIONS AND ISOTOPE SIGNATURES OF PALAEOZOIC BASEMENT ROCKS AND CENOZOIC VOLCANIC ROCKS FROM THE CENTRAL ANDEAN ARC AND BACK-ARC MINER. DEPOSITA 55 [2020] 1071-1084 doi: 10.1007/s00126-019-00915-2
[24446] TORRES I., NEMETH K., URETA G., AGUILERA F.: CHARACTERIZATION, ORIGIN, AND EVOLUTION OF ONE OF THE MOST ERODED MAFIC MONOGENETIC FIELDS WITHIN THE CENTRAL ANDES: THE CASE OF EL PAÕS LAVA FLOW FIELD, NORTHERN CHILE J. S. AMER. EARTH SCI. 105 (102942) [2021] doi: 10.1016/j.jsames.2020.102942
[24673] VAN ALDERWERELT B., UKSTINS I. A., RAMOS F. C.: SR ISOTOPES AND GEOCHEMISTRY OF CERRO OVERO MAAR PROVIDE A UNIQUE WINDOW INTO ARC MAGMA GENESIS IN THE CENTRAL VOLCANIC ZONE OF THE ANDES LITHOS 386-387 (105978) [2021] doi: 10.1016/j.lithos.2021.105978
[25100] VELANDIA J., MURCIA H. F., NEMETH K., BORRERO C.: UNCOMMON MAFIC ROCKS (MGO >10 WT.%) IN THE NORTHERNMOST ANDEAN VOLCANIC CHAIN (4∞ 25? N): IMPLICATIONS FOR MAGMA SOURCE AND EVOLUTION J. S. AMER. EARTH SCI. 110 (103308) [2021] doi: 10.1016/j.jsames.2021.103308
[3216] GERLACH D. C., FREY F. A., MORENO-ROA HUGO, LOPEZ-ESCOBAR L.: RECENT VOLCANISM IN THE PUYEHUE-CORDON CAULLE REGION, SOUTHERN ANDES, CHILE (40.5∞S): PETROGENESIS OF EVOLVED LAVAS J. PETROL. 29 [1988] 333-382 doi: 10.1093/petrology/29.2.333
[4350] LOPEZ-ESCOBAR L., PARADA M. A., HICKEY-VARGAS R., FREY F. A., KEMPTON P. D., MORENO-ROA HUGO: CALBUCO VOLCANO AND MINOR ERUPTIVE CENTERS DISTRIBUTED ALONG THE LIQUINE-OFQUI FAULT ZONE, CHILE (41∞ - 42∞ S): CONTRASTING ORIGIN OF ANDESITIC AND BASALTIC MAGMA IN THE SOUTHERN VOLCANIC ZONE OF THE ANDES CONTRIB. MINERAL. PETROL. 119 [1995] 345-361 doi: 10.1007/BF00286934
[7318] LOPEZ-ESCOBAR L., CEMBRANO J., MORENO H.: GEOCHEMISTRY AND TECTONICS OF THE CHILEAN SOUTHERN ANDES BASALTIC QUATERNARY VOLCANISM (37-46∞S) REV. GEOL. CHILE 22 [1995] 219-234 doi: 10.5027/andgeoV22n2-a06
[9717] GUZMAN S. R., PETRINOVIC I. A., BROD J. A.: PLEISTOCENE MAFIC VOLCANOES IN THE PUNA-CORDILLERA ORIENTAL BOUNDARY, NW-ARGENTINA J. VOLCANOL. GEOTHERM. RES. 158 [2006] 51-69 doi: 10.1016/j.jvolgeores.2006.04.014
[10905] RODRIGUEZ C., SELLES D., DUNGAN M. A., LANGMUIR C. H., LEEMAN W. P.: ADAKITIC DACITES FORMED BY INTRACRUSTAL CRYSTAL FRACTIONATION OF WATER-RICH PARENT MAGMAS AT NEVADO DE LONGAVI VOLCANO (36.2∞ S; ANDEAN SOUTHERN VOLCANIC ZONE, CENTRAL CHILE) J. PETROL. 48 [2007] 2033-2061 GeoReM-id: 3469 doi: 10.1093/petrology/egm049
[11543] MAMANI M., TASSARA A., W÷RNER G.: COMPOSITION AND STRUCTURAL CONTROL OF CRUSTAL DOMAINS IN THE CENTRAL ANDES GEOCHEMISTRY GEOPHYSICS GEOSYSTEMS 9 [2008] doi: 10.1029/2007GC001925
[11725] HOKE L., LAMB S.: CENOZOIC BEHIND-ARC VOLCANISM IN THE BOLIVIAN ANDES, SOUTH AMERICA: IMPLICATIONS FOR MANTLE MELT GENERATION AND LITHOSPHERE STRUCTURE J. GEOL. SOC. LONDON 164 [2007] 795-814 doi: 10.1144/0016-76492006-092
[11951] SINGER B. S., JICHA B. R., HARPER M. A., NARANJO J. A., LARA L. E., MORENO-ROA HUGO: ERUPTIVE HISTORY, GEOCHRONOLOGY, AND MAGMATIC EVOLUTION OF THE PUYEHUE-CORD”N CAULLE VOLCANIC COMPLEX, CHILE BULL. GEOL. SOC. AM. 120 [2008] 599-618 doi: 10.1130/B26276.1
[13695] MAMANI M., W÷RNER G., SEMPERE T.: GEOCHEMICAL VARIATIONS IN IGNEOUS ROCKS OF THE CENTRAL ANDEAN OROCLINE (13∞S TO 18∞S): TRACING CRUSTAL THICKENING AND MAGMA GENERATION THROUGH TIME AND SPACE BULL. GEOL. SOC. AM. 122 [2010] 162-182 doi: 10.1130/B26538.1
[13717] CHIARADIA M., M‹NTENER O., BEATE B., FONTIGNIE D.: ADAKITE-LIKE VOLCANISM OF ECUADOR: LOWER CRUST MAGMATIC EVOLUTION AND RECYCLING CONTRIB. MINERAL. PETROL. 158 [2009] 563-588 GeoReM-id: 4548 doi: 10.1007/s00410-009-0397-2
[15840] HIDALGO S., GERBE M. C., MARTIN H., SAMANIEGO P., BOURDON E.: ROLE OF CRUSTAL AND SLAB COMPONENTS IN THE NORTHERN VOLCANIC ZONE OF THE ANDES (ECUADOR) CONSTRAINED BY SR-ND-O ISOTOPES LITHOS 132-133 [2012] 180-192 GeoReM-id: 6536 doi: 10.1016/j.lithos.2011.11.019
[15990] RUPRECHT P., BERGANTZ G. W., COOPER KARI M., HILDRETH R. A.: THE CRUSTAL MAGMA STORAGE SYSTEM OF VOLC¡N QUIZAPU, CHILE, AND THE EFFECTS OF MAGMA MIXING ON MAGMA DIVERSITY J. PETROL. 53 [2012] 801-840 doi: 10.1093/petrology/egs002
[17460] WATT S. F. L., PYLE D. M., MATHER T. A., NARANJO J. A.: ARC MAGMA COMPOSITIONS CONTROLLED BY LINKED THERMAL AND CHEMICAL GRADIENTS ABOVE THE SUBDUCTING SLAB GEOPHYS. RES. LETT. 40 [2013] 2550-2556 doi: 10.1002/grl.50513
[17669] RISSE A., TRUMBULL R. B., KAY S. M., COIRA B. L., ROMER R. L.: MULTI-STAGE EVOLUTION OF LATE NEOGENE MANTLE-DERIVED MAGMAS FROM THE CENTRAL ANDES BACK-ARC IN THE SOUTHERN PUNA PLATEAU OF ARGENTINA J. PETROL. 54 [2013] 1963-1995 GeoReM-id: 7469 doi: 10.1093/PETROLOGY/EGT038
[18780] WEHRMANN H., HOERNLE K. A., JACQUES G., GARBE-SCH÷NBERG D., SCHUMANN K., MAHLKE J., LARA L. E.: VOLATILE (SULPHUR AND CHLORINE), MAJOR, AND TRACE ELEMENT GEOCHEMISTRY OF MAFIC TO INTERMEDIATE TEPHRAS FROM THE CHILEAN SOUTHERN VOLCANIC ZONE (33-43∞S) INT. J. EARTH SCI. (GEOL. RUNDSCHAU) 103 [2014] 1945-1962 doi: 10.1007/S00531-014-1006-9
[20346] HICKEY-VARGAS R., SUN MURONG, HOLBIK S.: GEOCHEMISTRY OF BASALTS FROM SMALL ERUPTIVE CENTERS NEAR VILLARRICA STRATOVOLCANO, CHILE: EVIDENCE FOR LITHOSPHERIC MANTLE COMPONENTS IN CONTINENTAL ARC MAGMAS GEOCHIM. COSMOCHIM. ACTA 185 [2016] 358-382 doi: 10.1016/j.gca.2016.03.033
[20960] ANCELLIN M.-A., SAMANIEGO P., VLASTELIC I., NAURET F., GANNOUN A.-M., HIDALGO S.: ACROSS-ARC VERSUS ALONG-ARC SR-ND-PB ISOTOPE VARIATIONS IN THE ECUADORIAN VOLCANIC ARC GEOCHEMISTRY GEOPHYSICS GEOSYSTEMS 18 [2017] 1163-1188 doi: 10.1002/2016GC006679
[24044] MEIXNER A., SARCHI C., LUCASSEN F., BECCHIO R. A., CAFFE P. J., LINDSAY J. M., ROSNER M., KASEMANN S. A.: LITHIUM CONCENTRATIONS AND ISOTOPE SIGNATURES OF PALAEOZOIC BASEMENT ROCKS AND CENOZOIC VOLCANIC ROCKS FROM THE CENTRAL ANDEAN ARC AND BACK-ARC MINER. DEPOSITA 55 [2020] 1071-1084 doi: 10.1007/s00126-019-00915-2
[4]M.N. Ducea, A.C. Seclaman, K.E. Murray, D. Jianu, L.M. Schoenbohm; Mantle-drip magmatism beneath the Altiplano-Puna plateau, central Andes. Geology 2013;; 41 (8): 915–918. doi: https://doi.org/10.1130/G34509.1
[5]Scott T. Drew, Mihai N. Ducea, Lindsay M. Schoenbohm; Mafic volcanism on the Puna Plateau, NW Argentina: Implications for lithospheric composition and evolution with an emphasis on lithospheric foundering. Lithosphere 2009;; 1 (5): 305–318. doi: https://doi.org/10.1130/L54.1
[6858] PERINI G., FRANCALANCI L., DAVIDSON J. P., CONTICELLI S.: EVOLUTION AND GENESIS OF MAGMAS FROM VICO VOLCANO, CENTRAL ITALY: MULTIPLE DIFFERENTIATION PATHWAYS AND VARIABLE PARENTAL MAGMAS J. PETROL. 45 [2004] 139-182 doi: 10.1093/petrology/egg084
[7586] CONTICELLI S., D^ANTONIO M., PINARELLI L., CIVETTA L.: SOURCE CONTAMINATION AND MANTLE HETEROGENEITY IN THE GENESIS OF ITALIAN POTASSIC AND ULTRAPOTASSIC VOLCANIC ROCKS: SR-ND-PB ISOTOPE DATA FROM ROMAN PROVINCE AND SOUTHERN TUSCANY MINERAL. PETROL. 74 [2002] 189-222 doi: 10.1007/s007100200004
[7613] CONTICELLI S.: THE EFFECT OF CRUSTAL CONTAMINATION ON ULTRAPOTASSIC MAGMAS WITH LAMPROITIC AFFINITY: MINERALOGICAL, GEOCHEMICAL AND ISOTOPE DATA FROM THE TORRE ALFINA LAVAS AND XENOLITHS, CENTRAL ITALY CHEM. GEOL. 149 [1998] 51-81 doi: 10.1016/S0009-2541(98)00038-2
[7677] DI BATTISTINI G., SAKAMOTO M., MONTANINI A., VENTURELLI G., TONARINI S.: PETROLOGY OF MELILITE-BEARING ROCKS FROM THE MONTEFIASCONE VOLCANIC COMPLEX (ROMAN MAGMATIC PROVINCE): NEW INSIGHTS INTO THE ULTRAPOTASSIC VOLCANISM OF CENTRAL ITALY LITHOS 59 [2001] 1-24 doi: 10.1016/S0024-4937(01)00054-8
[8134] AYUSO R. A., DE VIVO B., ROLANDI G., SEAL R. R.; II, PAONE A.: GEOCHEMICAL AND ISOTOPIC (ND-PB-SR-O) VARIATIONS BEARING ON THE GENESIS OF VOLCANIC ROCKS FROM VESUVIUS, ITALY J. VOLCANOL. GEOTHERM. RES. 82 [1998] 53-78 doi: 10.1016/S0377-0273(97)00057-7
[8137] CONTICELLI S., FRANCALANCI L., MANETTI P., CIONI R., SBRANA A.: PETROLOGY AND GEOCHEMISTRY OF THE ULTRAPOTASSIC ROCKS FROM THE SABATINI VOLCANIC DISTRICT, CENTRAL ITALY: THE ROLE OF EVOLUTIONARY PROCESSES IN THE GENESIS OF VARIABLY ENRICHED ALKALINE MAGMAS J. VOLCANOL. GEOTHERM. RES. 75 [1997] 107-136 doi: 10.1016/S0377-0273(96)00062-5
[8139] VILLEMANT B., TRIGILA R., DE VIVO B.: GEOCHEMISTRY OF VESUVIUS VOLCANICS DURING 1631-1944 PERIOD J. VOLCANOL. GEOTHERM. RES. 58 [1993] 291-313 doi: 10.1016/0377-0273(93)90114-7
[8140] BELKIN H. E., KILBURN C. R. J., DE VIVO B.: SAMPLING AND MAJOR ELEMENT CHEMISTRY OF THE RECENT (A.D. 1631-1944) VESUVIUS ACTIVITY J. VOLCANOL. GEOTHERM. RES. 58 [1993] 273-290 doi: 10.1016/0377-0273(93)90113-6
[8163] HOLM P. M., LOU S., NIELSEN A.: THE GEOCHEMISTRY AND PETROGENESIS OF THE LAVAS OF THE VULSINIAN DISTRICT, ROMAN PROVINCE, CENTRAL ITALY CONTRIB. MINERAL. PETROL. 80 [1982] 367-378 doi: 10.1007/BF00378009
[8178] CONTICELLI S., FRANCALANCI L., SANTO A. P.: PETROLOGY OF FINAL-STAGE LATERA LAVAS (VULSINI MTS.): MINERALOGICAL, GEOCHEMICAL AND SR-ISOTOPIC DATA AND THEIR BEARING ON THE GENESIS OF SOME POTASSIC MAGMAS IN CENTRAL ITALY J. VOLCANOL. GEOTHERM. RES. 46 [1991] 187-212 GeoReM-id: 1197 doi: 10.1016/0377-0273(91)90083-C
[8252] CONTICELLI S., PECCERILLO A.: PETROLOGICAL SIGNIFICANCE OF HIGH-PRESSURE ULTRAMAFIC XENOLITHS FROM ULTRAPOTASSIC ROCKS OF CENTRAL ITALY LITHOS 24 [1990] 305-322 doi: 10.1016/0024-4937(89)90050-9
[8267] PECCERILLO A., CONTICELLI S., MANETTI P.: PETROLOGICAL CHARACTERISTICS AND THE GENESIS OF THE RECENT MAGMATISM OF SOUTHERN TUSCANY AND NORTHERN LATIUM PER. MINERAL. 56 [1987] 157-172
[8396] CUNDARI A.: PETROGENESIS OF LEUCITE-BEARING LAVAS IN THE ROMAN VOLCANIC REGION, ITALY. THE SABATINI LAVAS CONTRIB. MINERAL. PETROL. 70 [1979] 9-21 doi: 10.1007/BF00371867
[9312] GHIARA M. R., LIRER L.: MINERALOGY AND GEOCHEMISTRY OF THE ^LOW POTASSIUM^ SERIES OF THE ROCCAMONFINA VOLCANIC SUITE (CAMPANIA, SOUTH ITALY) BULL. VOLCANOL. 40 [1977] 39-56 doi: 10.1007/BF02599828
[11285] AVANZINELLI R., ELLIOTT T. R., TOMMASINI S., CONTICELLI S.: CONSTRAINTS ON THE GENESIS OF POTASSIUM-RICH ITALIAN VOLCANIC ROCKS FROM U/TH DISEQUILIBRIUM J. PETROL. 49 [2008] 195-223 GeoReM-id: 4062 doi: 10.1093/petrology/egm076
[12470] SOMMA R., AYUSO R. A., DE VIVO B.: A GEOCHEMICAL AND ISOTOPIC (ND-PB) COMPARISON OF VOLCANIC ROCKS ERUPTED DURING THE LAST 3,550 YRS. B.P. OF INTERPLINIAN ACTIVITY OF SOMMA-VESUVIUS VOLCANO, SOUTHERN ITALY U. S. GEOL. SURV. OPEN FILE REPT. 99-365 [1999] 1-9
[12474] GIANNETTI B.: COARSE-GRAINED AND PORPHYRITIC INCLUSIONS IN PHONOLITIC LAVAS, ROCCAMONFINA VOLCANO, ITALY J. VOLCANOL. GEOTHERM. RES. 117 [2002] 297-325 doi: 10.1016/S0377-0273(02)00227-5
[12635] ROUCHON V., GILLOT P.-Y., QUIDELLEUR X., CHIESA S., FLORIS B.: TEMPORAL EVOLUTION OF THE ROCCAMONFINA VOLCANIC COMPLEX (PLEISTOCENE), CENTRAL ITALY J. VOLCANOL. GEOTHERM. RES. 177 [2008] 500-514 doi: 10.1016/j.jvolgeores.2008.07.016
[12849] CONTICELLI S., GUARNIERI L., FARINELLI A., MATTEI M., AVANZINELLI R., BIANCHINI G., BOARI E., TOMMASINI S., TIEPOLO M., PRELEVIC D., VENTURELLI G.: TRACE ELEMENTS AND SR-ND-PB ISOTOPES OF K-RICH, SHOSHONITIC, AND CALC-ALKALINE MAGMATISM OF THE WESTERN MEDITERRANEAN REGION: GENESIS OF ULTRAPOTASSIC TO CALC-ALKALINE MAGMATIC ASSOCIATIONS IN A POST-COLLISIONAL GEODYNAMIC SETTING LITHOS 107 […
[13059] GIORDANO G., DE BENEDETTI A. A., DIANA A., DIANO G., GAUDIOSO F., MARASCO F., MICELI M., MOLLO S., CAS R. A. F., FUNICIELLO R.: THE COLLI ALBANI MAFIC CALDERA (ROMA, ITALY): STRATIGRAPHY, STRUCTURE AND PETROLOGY J. VOLCANOL. GEOTHERM. RES. 155 [2006] 49-80 doi: 10.1016/j.jvolgeores.2006.02.009
[13061] FREDA C., GAETA M., PALLADINO D. M., TRIGILA R.: THE VILLA SENNI ERUPTION (ALBAN HILLS, CENTRAL ITALY): THE ROLE OF H2O AND CO2 ON THE MAGMA CHAMBER EVOLUTION AND ON THE ERUPTIVE SCENARIO J. VOLCANOL. GEOTHERM. RES. 78 [1997] 103-120 doi: 10.1016/S0377-0273(97)00007-3
[13219] CHELAZZI L., BINDI L., OLMI F., MENCHETTI S., PECCERILLO A., CONTICELLI S.: A LAMPROITE COMPONENT IN THE HIGH-K CALC-ALKALINE VOLCANIC ROCKS OF THE CAPRAIA ISLAND, TUSCAN MAGMATIC PROVINCE: EVIDENCE FROM CLINOPYROXENE CRYSTAL CHEMICAL DATA PER. MINERAL. 75 [2006] 75-94
[13517] BOARI E., TOMMASINI S., LAURENZI M. A., CONTICELLI S.: TRANSITION FROM ULTRAPOTASSIC KAMAFUGITIC TO SUB-ALKALINE MAGMAS: SR, ND, AND PB ISOTOPE, TRACE ELEMENT AND 40AR-39AR AGE DATA FROM THE MIDDLE LATIN VALLEY VOLCANIC FIELD, ROMAN MAGMATIC PROVINCE, CENTRAL ITALY J. PETROL. 50 [2009] 1327-1357 GeoReM-id: 4990 doi: 10.1093/petrology/egp003
[13804] BOARI E., AVANZINELLI R., MELLUSO L., GIORDANO G., MATTEI M., DE BENEDETTI A. A., MORRA V., CONTICELLI S.: ISOTOPE GEOCHEMISTRY (SR-ND-PB) AND PETROGENESIS OF LEUCITE-BEARING VOLCANIC ROCKS FROM ìCOLLI ALBANIî VOLCANO, ROMAN MAGMATIC PROVINCE, CENTRAL ITALY: INFERENCES ON VOLCANO EVOLUTION AND MAGMA GENESIS BULL. VOLCANOL. 71 [2009] 977-1005 doi: 10.1007/s00445-009-0278-6
[14754] PRELEVIC D., STRACKE A., FOLEY S. F., ROMER R. L., CONTICELLI S.: HF ISOTOPE COMPOSITIONS OF MEDITERRANEAN LAMPROITES: MIXING OF MELTS FROM ASTHENOSPHERE AND CRUSTALLY CONTAMINATED MANTLE LITHOSPHERE LITHOS 119 [2010] 297-312 GeoReM-id: 5325 doi: 10.1016/j.lithos.2010.07.007
[14957] NIKOGOSIAN I. K., VAN BERGEN M. J.: HETEROGENEOUS MANTLE SOURCES OF POTASSIUM-RICH MAGMAS IN CENTRAL-SOUTHERN ITALY: MELT INCLUSION EVIDENCE FROM ROCCAMONFINA AND ERNICI (MID LATINA VALLEY) J. VOLCANOL. GEOTHERM. RES. 197 [2010] 279-302 doi: 10.1016/j.jvolgeores.2010.06.014
[15734] CONTICELLI S., AVANZINELLI R., MARCHIONNI S., TOMMASINI S., MELLUSO L.: SR-ND-PB ISOTOPES FROM THE RADICOFANI VOLCANO, CENTRAL ITALY: CONSTRAINTS ON HETEROGENEITIES IN A VEINED MANTLE RESPONSIBLE FOR THE SHIFT FROM ULTRAPOTASSIC SHOSHONITE TO BASALTIC ANDESITE MAGMAS IN A POST-COLLISIONAL SETTING MINERAL. PETROL. 103 [2011] 123-148 doi: 10.1007/s00710-011-0161-y
[17671] CONTICELLI S., AVANZINELLI R., POLI G., BRASCHI E., GIORDANO G.: SHIFT FROM LAMPROITE-LIKE TO LEUCITITIC ROCKS: SR-ND-PB ISOTOPE DATA FROM THE MONTE CIMINO VOLCANIC COMPLEX VS. THE VICO STRATOVOLCANO, CENTRAL ITALY CHEM. GEOL. 353 [2013] 246-266 GeoReM-id: 7558 doi: 10.1016/j.chemgeo.2012.10.018
[23164] CASALINI M., AVANZINELLI R., TOMMASINI S., ELLIOTT T. R., CONTICELLI S.: CE/MO AND MOLYBDENUM ISOTOPE SYSTEMATICS IN SUBDUCTION-RELATED OROGENIC POTASSIC MAGMAS OF CENTRAL-SOUTHERN ITALY GEOCHEMISTRY GEOPHYSICS GEOSYSTEMS 20 [2019] 2753-2768 GeoReM-id: 11820 doi: 10.1029/2019GC008193
[15465] ELY K. S., SANDIFORD M., HAWKE M. L., PHILLIPS D., QUIGLEY M., DOS REIS J. E.: EVOLUTION OF ATA⁄RO ISLAND: TEMPORAL CONSTRAINTS ON SUBDUCTION PROCESSES BENEATH THE WETAR ZONE, BANDA ARC J. ASIAN EARTH SCI. 41 [2011] 477-493 doi: 10.1016/j.jseaes.2011.01.019
[2496] WOODHEAD J. D., JOHNSON R. W.: ISOTOPIC AND TRACE-ELEMENT PROFILES ACROSS THE NEW BRITAIN ISLAND ARC, PAPUA NEW GUINEA CONTRIB. MINERAL. PETROL. 113 [1993] 479-491 doi: 10.1007/BF00698317
[2703] WOODHEAD J. D., EGGINS S. M., JOHNSON R. W.: MAGMA GENESIS IN THE NEW BRITAIN ISLAND ARC: FURTHER INSIGHTS INTO MELTING AND MASS TRANSFER PROCESSES J. PETROL. 39 [1998] 1641-1668 doi: 10.1093/petroj/39.9.1641
[3275] GUST D. A., JOHNSON R. W.: AMPHIBOLE-BEARING INCLUSIONS FROM BOISA ISLAND, PAPUA NEW GUINEA: EVALUATION OF THE ROLE OF FRACTIONAL CRYSTALLIZATION IN AN ANDESITIC VOLCANO J. GEOL. 89 [1981] 219-232 doi: 10.1086/628581
[4046] JOHNSON R. W., ARCULUS R. J.: VOLCANIC ROCKS OF THE WITU ISLANDS, PAPUA NEW GUINEA: THE ORIGIN OF MAGMAS ABOVE THE DEEPEST PARTS OF THE NEW BRITAIN BENIOFF ZONE BULL. VOLCANOL. 41 [1978] 609-655 doi: 10.1007/BF02597390
[4590] WOODHEAD J. D., HERGT J. M., DAVIDSON J. P., EGGINS S. M.: HAFNIUM ISOTOPE EVIDENCE FOR ^CONSERVATIVE^ ELEMENT MOBILITY DURING SUBDUCTION ZONE PROCESSES EARTH PLANET. SCI. LETT. 192 [2001] 331-346 doi: 10.1016/S0012-821X(01)00453-8
[6900] WOODHEAD J. D., BRAUNS M.: CURRENT LIMITATIONS OF THE UNDERSTANDING OF RE-OS BEHAVIOUR IN SUBDUCTION SYSTEMS, WITH AN EXAMPLE FROM NEW BRITAIN EARTH PLANET. SCI. LETT. 221 [2004] 309-323 doi: 10.1016/S0012-821X(04)00091-3
[13233] CUNNINGHAM H. S., TURNER SIMON P., DOSSETO A., PATIA H., EGGINS S. M., ARCULUS R. J.: TEMPORAL VARIATIONS IN U-SERIES DISEQUILIBRIA IN AN ACTIVE CALDERA, RABAUL, PAPUA NEW GUINEA J. PETROL. 50 [2009] 507-529 GeoReM-id: 4508 doi: 10.1093/petrology/egp009
[16768] CUNNINGHAM H. S., TURNER SIMON P., PATIA H., WYSOCZANSKI R. J., NICHOLS A. R. L., EGGINS S. M., DOSSETO A.: (210PB/226RA) VARIATIONS DURING THE 1994-2001 INTRACALDERA VOLCANISM AT RABAUL CALDERA J. VOLCANOL. GEOTHERM. RES. 184 [2009] 416-426 doi: 10.1016/j.jvolgeores.2009.04.018
[22487] MCKEE C. O., FABBRO G. N.: THE TALILI PYROCLASTICS ERUPTION SEQUENCE: VEI 5 PRECURSOR TO THE SEVENTH CENTURY CE CALDERA-FORMING EVENT AT RABAUL, PAPUA NEW GUINEA BULL. VOLCANOL. 80 (79) [2018] doi: 10.1007/s00445-018-1255-8
[2261] BORG L. E., BRANDON A. D., CLYNNE M. A., WALKER R. J.: RE-OS ISOTOPIC SYSTEMATICS OF PRIMITIVE LAVAS FROM THE LASSEN REGION OF THE CASCADE ARC, CALIFORNIA EARTH PLANET. SCI. LETT. 177 [2000] 301-317 doi: 10.1016/S0012-821X(00)00051-0
[3208] BACON C. R., GUN S. H., LANPHERE M. A., WOODEN J. L.: MULTIPLE ISOTOPIC COMPONENTS IN QUATERNARY VOLCANIC ROCKS OF THE CASCADE ARC NEAR CRATER LAKE, OREGON J. PETROL. 35 [1994] 1521-1556 GeoReM-id: 207 doi: 10.1093/petrology/35.6.1521
[3576] SMITH D. R., LEEMAN W. P.: THE ORIGIN OF MOUNT ST. HELENS ANDESITES J. VOLCANOL. GEOTHERM. RES. 55 [1993] 271-303 doi: 10.1016/0377-0273(93)90042-P
[3613] BAKER M. B., GROVE T. L., PRICE R. C.: PRIMITIVE BASALTS AND ANDESITES FROM THE MT. SHASTA REGION, N. CALIFORNIA: PRODUCTS OF VARYING MELT FRACTION AND WATER CONTENT CONTRIB. MINERAL. PETROL. 118 [1994] 111-129 GeoReM-id: 210 doi: 10.1007/BF01052863
[3657] BORG L. E., CLYNNE M. A., MCMILLAN N. J.: THE VARIABLE ROLE OF SLAB-DERIVED FLUIDS IN THE GENERATION OF A SUITE OF PRIMITIVE CALC-ALKALINE LAVAS FROM THE SOUTHERNMOST CASCADES, CALIFORNIA CAN. MINERAL. 35 [1997] 425-452
[3755] LEEMAN W. P., SMITH D. R., HILDRETH W., PALACZ Z. A., ROGERS N. W.: COMPOSITIONAL DIVERSITY OF LATE CENOZOIC BASALTS IN A TRANSECT ACROSS THE SOUTHERN WASHINGTON CASCADES: IMPLICATIONS FOR SUBDUCTION ZONE MAGMATISM J. GEOPHYS. RES. B95 [1990] 19561-19582 doi: 10.1029/JB095iB12p19561
[4438] HILDRETH R. A., LANPHERE M. A.: POTASSIUM-ARGON GEOCHRONOLOGY OF A BASALT-ANDESITE-DACITE ARC SYSTEM: THE MOUNT ADAMS VOLCANIC FIELD, CASCADE RANGE OF SOUTHERN WASHINGTON BULL. GEOL. SOC. AM. 106 [1994] 1413-1429 doi: 10.1130/0016-7606(1994)106<1413:PAGOAB>2.3.CO;2
[4449] BACON C. R.: CALC-ALKALINE, SHOSHONITIC AND PRIMITIVE THOLEIITIC LAVAS FROM MONOGENETIC VOLCANOES NEAR CRATER LAKE, OREGON J. PETROL. 31 [1990] 135-166 doi: 10.1093/petrology/31.1.135
[4450] BACON C. R., BRUGGMAN P. E., CHRISTIANSEN R. L., CLYNNE M. A., DONNELLY-NOLAN J. M., HILDRETH W.: PRIMITIVE MAGMAS AT FIVE CASCADE VOLCANIC FIELDS: MELTS FROM HOT, HETEROGENEOUS SUB-ARC MANTLE CAN. MINERAL. 35 [1997] 397-423
[4457] GREEN N. L., HENDERSON P.: RECENT ERUPTIONS OF MOUNT ADAMS, WASHINGTON CASCADES BULL. VOLCANOL. 58 [1997] 472-490 doi: 10.1007/s004450050156
[4458] HILDRETH W., FIERSTEIN J. E.: MAFIC MAGMATISM AND ASSOCIATED TECTONISM OF THE CENTRAL HIGH CASCADES RANGE, OREGON J. GEOPHYS. RES. B95 [1990] 19623-19638 doi: 10.1029/JB095iB12p19623
[4459] HUGHES S. S.: GEOCHEMISTRY, PETROGENESIS, AND TECTONIC IMPLICATIONS OF CENTRAL HIGH CASCADE MAFIC PLATFORM LAVAS BULL. GEOL. SOC. AM. 97 [1986] 1024-1036 doi: 10.1130/0016-7606(1986)97<1024:GPATIO>2.0.CO;2
[4684] GROVE T. L., PARMAN S. W., BOWRING S. A., PRICE R. C., BAKER M. B.: THE ROLE OF A H2O-RICH FLUID COMPONENT IN THE GENERATION OF PRIMITIVE BASALTIC ANDESITES AND ANDESITES FROM THE MT. SHASTA REGION, N CALIFORNIA CONTRIB. MINERAL. PETROL. 142 [2002] 375-396 doi: 10.1007/s004100100299
[4790] REINERS P. W., HAMMOND P. E., MCKENNA J. M., DUNCAN R. A.: YOUNG BASALTS OF THE CENTRAL WASHINGTON CASCADES, FLUX MELTING OF THE MANTLE, AND TRACE ELEMENT SIGNATURES OF PRIMARY ARC MAGMAS CONTRIB. MINERAL. PETROL. 138 [2000] 249-264 doi: 10.1007/s004100050561
[4943] BORG L. E., BLICHERT-TOFT J., CLYNNE M. A.: ANCIENT AND MODERN SUBDUCTION ZONE CONTRIBUTIONS TO THE MANTLE SOURCES OF LAVAS FROM THE LASSEN REGION OF CALIFORNIA INFERRED FROM LU-HF ISOTOPIC SYSTEMATICS J. PETROL. 43 [2002] 705-723 doi: 10.1093/petrology/43.4.705
[5709] PRUEHER L. M., MCBIRNEY A. R.: RELATIONS OF CINDER CONES TO THE MAGMATIC EVOLUTION OF MOUNT MAZAMA, CRATER LAKE NATIONAL PARK, OREGON J. VOLCANOL. GEOTHERM. RES. 35 [1988] 253-268 doi: 10.1016/0377-0273(88)90021-2
[8496] LEE CIN-TY A., LEEMAN W. P., CANIL D., LI ZHENG-XUE: SIMILAR V/SC SYSTEMATICS IN MORB AND ARC BASALTS: IMPLICATIONS FOR THE OXYGEN FUGACITIES OF THEIR MANTLE SOURCE REGIONS J. PETROL. 46 [2005] 2313-2336 doi: 10.1093/petrology/egi056
[10782] MAGNA T., WIECHERT U. H., GROVE T. L., HALLIDAY A. N.: LITHIUM ISOTOPE FRACTIONATION IN THE SOUTHERN CASCADIA SUBDUCTION ZONE EARTH PLANET. SCI. LETT. 250 [2006] 428-443 GeoReM-id: 2501 doi: 10.1016/j.epsl.2006.08.019
[12903] JICHA B. R., HART G. L., JOHNSON CLARK M., HILDRETH W., BEARD B. L., SHIREY S. B., VALLEY J. W.: ISOTOPIC AND TRACE ELEMENT CONSTRAINTS ON THE PETROGENESIS OF LAVAS FROM THE MOUNT ADAMS VOLCANIC FIELD, WASHINGTON CONTRIB. MINERAL. PETROL. 157 [2009] 189-207 GeoReM-id: 4534 doi: 10.1007/s00410-008-0329-6
[13454] HART G. L., JOHNSON CLARK M., HILDRETH W., SHIREY S. B.: NEW OSMIUM ISOTOPE EVIDENCE FOR INTRACRUSTAL RECYCLING OF CRUSTAL DOMAINS WITH DISCRETE AGES GEOLOGY 31 [2003] 427-430 doi: 10.1130/0091-7613(2003)031<0427:NOIEFI>2.0.CO;2
[14784] JICHA B. R., JOHNSON CLARK M., HILDRETH W., BEARD B. L., HART G. L., SHIREY S. B., SINGER B. S.: DISCRIMINATING ASSIMILANTS AND DECOUPLING DEEP- VS. SHALLOW-LEVEL CRYSTAL RECORDS AT MOUNT ADAMS USING 238U-230TH DISEQUILIBRIA AND OS ISOTOPES EARTH PLANET. SCI. LETT. 277 [2009] 38-49 GeoReM-id: 3939 doi: 10.1016/j.epsl.2008.09.035
[15091] ROWE M. C., NIELSEN ROGER L., KENT A. J. R.: ANOMALOUSLY HIGH FE CONTENTS IN REHOMOGENIZED OLIVINE-HOSTED MELT INCLUSIONS FROM OXIDIZED MAGMAS AM. MINERAL. 91 [2006] 82-91 doi: 10.2138/am.2006.1818
[15673] MUFFLER L. J. P., CLYNNE M. A., CALVERT A. T., CHAMPION DUANE E.: DIVERSE, DISCRETE, MANTLE-DERIVED BATCHES OF BASALT ERUPTED ALONG A SHORT NORMAL FAULT ZONE: THE POISON LAKE CHAIN, SOUTHERNMOST CASCADES BULL. GEOL. SOC. AM. 123 [2011] 2177-2200 doi: 10.1130/B30370.1
[15717] FIERSTEIN J. E., HILDRETH R. A., CALVERT A. T.: ERUPTIVE HISTORY OF SOUTH SISTER, OREGON CASCADES J. VOLCANOL. GEOTHERM. RES. 207 [2011] 145-179 doi: 10.1016/j.jvolgeores.2011.06.003
[15780] MITCHELL E. C., ASMEROM Y.: U-SERIES ISOTOPE SYSTEMATICS OF MAFIC MAGMAS FROM CENTRAL OREGON: IMPLICATIONS FOR FLUID INVOLVEMENT AND MELTING PROCESSES IN THE CASCADE ARC EARTH PLANET. SCI. LETT. 312 [2011] 378-389 GeoReM-id: 6061 doi: 10.1016/j.epsl.2011.09.060
[15956] MOORE N. E., DEBARI S. M.: MAFIC MAGMAS FROM MOUNT BAKER IN THE NORTHERN CASCADE ARC, WASHINGTON: PROBES INTO MANTLE AND CRUSTAL PROCESSES CONTRIB. MINERAL. PETROL. 163 [2012] 521-546 doi: 10.1007/s00410-011-0686-4
[17450] ANKNEY M. E., JOHNSON CLARK M., BACON C. R., BEARD B. L., JICHA B. R.: DISTINGUISHING LOWER AND UPPER CRUSTAL PROCESSES IN MAGMAS ERUPTED DURING THE BUILDUP TO THE 7.7 KA CLIMACTIC ERUPTION OF MOUNT MAZAMA, CRATER LAKE, OREGON, USING 238U-230TH DISEQUILIBRIA CONTRIB. MINERAL. PETROL. 166 [2013] 563-585 GeoReM-id: 7644 doi: 10.1007/s00410-013-0891-4
[17710] MULLEN E. K., WEIS D.: SR-ND-HF-PB ISOTOPE AND TRACE ELEMENT EVIDENCE FOR THE ORIGIN OF ALKALIC BASALTS IN THE GARIBALDI BELT, NORTHERN CASCADE ARC GEOCHEMISTRY GEOPHYSICS GEOSYSTEMS 14 [2013] 3126-3155 GeoReM-id: 7649 doi: 10.1002/ggge.20191
[18091] MULLEN E. K., MCCALLUM I. S.: ORIGIN OF BASALTS IN A HOT SUBDUCTION SETTING: PETROLOGICAL AND GEOCHEMICAL INSIGHTS FROM MT. BAKER, NORTHERN CASCADE ARC J. PETROL. 55 [2014] 241-281 GeoReM-id: 7892 doi: 10.1093/petrology/egt064
[18114] SISSON T. W., SALTERS V. J. M., LARSON P. B.: PETROGENESIS OF MOUNT RAINIER ANDESITE: MAGMA FLUX AND GEOLOGIC CONTROLS ON THE CONTRASTING DIFFERENTIATION STYLES AT STRATOVOLCANOES OF THE SOUTHERN WASHINGTON CASCADES BULL. GEOL. SOC. AM. 126 [2014] 122-144 doi: 10.1130/B30852.1
[19246] MULLEN E. K., WEIS D.: EVIDENCE FOR TRENCH-PARALLEL MANTLE FLOW IN THE NORTHERN CASCADE ARC FROM BASALT GEOCHEMISTRY EARTH PLANET. SCI. LETT. 414 [2015] 100-107 GeoReM-id: 8587 doi: 10.1016/j.epsl.2015.01.010
[19253] COUSENS B. L., PRYTULAK J., HENRY C. D., ALCAZAR AL, BROWNRIGG T.: GEOLOGY, GEOCHRONOLOGY, AND GEOCHEMISTRY OF THE MIOCENE-PLIOCENE ANCESTRAL CASCADES ARC, NORTHERN SIERRA NEVADA, CALIFORNIA AND NEVADA: THE ROLES OF THE UPPER MANTLE, SUBDUCTING SLAB, AND THE SIERRA NEVADA LITHOSPHERE GEOSPHERE 4 [2008] 829-853 doi: 10.1130/GES00166.1
[20728] MULLEN E. K., WEIS D., MARSH N. B., MARTINDALE M.: PRIMITIVE ARC MAGMA DIVERSITY: NEW GEOCHEMICAL INSIGHTS IN THE CASCADE ARC CHEM. GEOL. 448 [2017] 43-70 GeoReM-id: 10145 doi: 10.1016/j.chemgeo.2016.11.006
[22652] WANKE M., CLYNNE M. A., VON QUADT A., VENNEMANN T. W., BACHMANN O.: GEOCHEMICAL AND PETROLOGICAL DIVERSITY OF MAFIC MAGMAS FROM MOUNT ST. HELENS CONTRIB. MINERAL. PETROL. 174 (10) [2019] GeoReM-id: 11798 doi: 10.1007/s00410-018-1544-4
[22656] WANKE M., KARAKAS O., BACHMANN O.: THE GENESIS OF ARC DACITES: THE CASE OF MOUNT ST. HELENS, WA CONTRIB. MINERAL. PETROL. 174 (7) [2019] doi: 10.1007/s00410-018-1542-6
[4519] WALKER J. A., CARR M. J.: COMPOSITIONAL VARIATIONS CAUSED BY PHENOCRYST SORTING AT CERRO NEGRO VOLCANO, NICARAGUA BULL. GEOL. SOC. AM. 97 [1986] 1156-1162 doi: 10.1130/0016-7606(1986)97<1156:CVCBPS>2.0.CO;2
[11616] SADOFSKY S. J., PORTNYAGIN M. V., HOERNLE K. A., VAN DEN BOGAARD P.: SUBDUCTION CYCLING OF VOLATILES AND TRACE ELEMENTS THROUGH THE CENTRAL AMERICAN VOLCANIC ARC: EVIDENCE FROM MELT INCLUSIONS CONTRIB. MINERAL. PETROL. 155 [2008] 433-456 doi: 10.1007/s00410-007-0251-3
[14081] BOLGE L. L., CARR M. J., MILIDAKIS K. I., LINDSAY F. N., FEIGENSON M. D.: CORRELATING GEOCHEMISTRY, TECTONICS, AND VOLCANIC VOLUME ALONG THE CENTRAL AMERICAN VOLCANIC FRONT GEOCHEMISTRY GEOPHYSICS GEOSYSTEMS 10 [2009] doi: 10.1029/2009GC002704
[14385] RAUSCH J., SCHMINCKE H.-U.: NEJAPA TEPHRA: THE YOUNGEST (C. 1 KA BP) HIGHLY EXPLOSIVE HYDROCLASTIC ERUPTION IN WESTERN MANAGUA (NICARAGUA) J. VOLCANOL. GEOTHERM. RES. 192 [2010] 159-177 doi: 10.1016/j.jvolgeores.2010.02.010
[15389] ALVARADO G. E., PEREZ W., VOGEL T. A., GR÷GER H., PATINO L. C.: THE CERRO CHOPO BASALTIC CONE (COSTA RICA): AN UNUSUAL COMPLETELY REVERSED GRADED PYROCLASTIC CONE WITH ABUNDANT LOW VESICULATED CANNONBALL JUVENILE FRAGMENTS J. VOLCANOL. GEOTHERM. RES. 201 [2011] 163-177 doi: 10.1016/j.jvolgeores.2010.11.010
[15846] AVELLAN D. R., MACIAS J. L., PARDO N., SCOLAMACCHIA T., RODRIGUEZ D.: STRATIGRAPHY, GEOMORPHOLOGY, GEOCHEMISTRY AND HAZARD IMPLICATIONS OF THE NEJAPA VOLCANIC FIELD, WESTERN MANAGUA, NICARAGUA J. VOLCANOL. GEOTHERM. RES. 213-214 [2012] 51-71 doi: 10.1016/j.jvolgeores.2011.11.002
[18727] HIDALGO P. J., ROONEY T. O.: PETROGENESIS OF A VOLUMINOUS QUATERNARY ADAKITIC VOLCANO: THE CASE OF BARU VOLCANO CONTRIB. MINERAL. PETROL. 168 (1011) [2014] doi: 10.1007/S00410-014-1011-9
[23384] FREUNDT A., KUTTEROLF S.: THE LONG-LIVED CHILTEPE VOLCANIC COMPLEX, NICARAGUA: MAGMATIC EVOLUTION AT AN ARC OFFSET BULL. VOLCANOL. 81 (60) [2019] doi: 10.1007/s00445-019-1321-x
[6753] YOSHIDA T., AOKI K.-I., LEE MOON WON, ISHIKAWA K.-I., KANEKO N.: ELEMENTAL ABUNDANCES IN SOME BASALTIC ROCKS FROM THE JAPAN ARC AND ADJACENT AREA RES. REPORT LAB. NUCLEAR SCI. TOHOKU UNIV. 15 [1982] 239-248
[21481] UEKI K., IWAMORI H.: GEOCHEMICAL DIFFERENTIATION PROCESSES FOR ARC MAGMA OF THE SENGAN VOLCANIC CLUSTER, NORTHEASTERN JAPAN, CONSTRAINED FROM PRINCIPAL COMPONENT ANALYSIS LITHOS 290-291 [2017] 60-75 GeoReM-id: 10668 doi: 10.1016/j.lithos.2017.08.001
[3220] KOYAGUCHI T.: TEXTURAL AND COMPOSITIONAL EVIDENCE FOR MAGMA MIXING AND ITS MECHANISM, ABU VOLCANIC GROUP, SOUTHWESTERN JAPAN CONTRIB. MINERAL. PETROL. 93 [1986] 33-45 doi: 10.1007/BF00963583
[9796] HANYU TAKESHI, TATSUMI Y., NAKAI S., CHANG QING, MIYAZAKI T., SATO KEIKO, TANI K., SHIBATA T., YOSHIDA T.: CONTRIBUTION OF SLAB MELTING AND SLAB DEHYDRATION TO MAGMATISM IN THE NE JAPAN ARC FOR THE LAST 25 MYR: CONSTRAINTS FROM GEOCHEMISTRY GEOCHEMISTRY GEOPHYSICS GEOSYSTEMS 7 [2006] GeoReM-id: 2534 doi: 10.1029/2005GC001220
[14627] MATSUMOTO A., NAKAGAWA M.: FORMATION AND EVOLUTION OF SILICIC MAGMA PLUMBING SYSTEM: PETROLOGY OF THE VOLCANIC ROCKS OF USU VOLCANO, HOKKAIDO, JAPAN J. VOLCANOL. GEOTHERM. RES. 196 [2010] 185-207 doi: 10.1016/j.jvolgeores.2010.07.014
[16923] TAKAHASHI T., HIRAHARA Y., MIYAZAKI T., SENDA R., CHANG QING, KIMURA J.-I., TATSUMI Y.: PRIMARY MAGMAS AT THE VOLCANIC FRONT OF THE NE JAPAN ARC: COEVAL ERUPTION OF CRUSTAL LOW-K THOLEIITIC AND MANTLE-DERIVED MEDIUM-K CALC-ALKALINE BASALTS AT AZUMA VOLCANO J. PETROL. 54 [2013] 103-148 GeoReM-id: 7451 doi: 10.1093/petrology/egs065
[18191] KIYOSUGI K., HORIKAWA Y., NAGAO T., ITAYA T., CONNOR C. B., TANAKA K.: SCORIA CONE FORMATION THROUGH A VIOLENT STROMBOLIAN ERUPTION: IRAO VOLCANO, SW JAPAN BULL. VOLCANOL. 76 (781) [2014] doi: 10.1007/s00445-013-0781-7
[5246] TSUKUI M., SUZUKI M., SANO A.: EVOLUTION OF MAGMA PLUMBING SYSTEM OF HACHIJO-HIGASHIYAMA VOLCANO IN THE LAST 30,000 YEARS BULL. VOLCANOL. SOC. JAPAN, SER. 2 38 [1993] 199-212 doi: 10.18940/kazan.38.6_199
[8488] TAMURA Y., TANI K., ISHIZUKA O., CHANG QING, SHUKUNO H., FISKE R. S.: ARE ARC BASALTS DRY, WET, OR BOTH? EVIDENCE FROM THE SUMISU CALDERA VOLCANO, IZU-BONIN ARC, JAPAN J. PETROL. 46 [2005] 1769-1803 GeoReM-id: 1132 doi: 10.1093/petrology/egi033
[9041] WATANABE S., WIDOM E., UI T., MIYAJI N., ROBERTS A. M.: THE EVOLUTION OF A CHEMICALLY ZONED MAGMA CHAMBER: THE 1707 ERUPTION OF FUJI VOLCANO, JAPAN J. VOLCANOL. GEOTHERM. RES. 152 [2006] 1-19 GeoReM-id: 1119 doi: 10.1016/j.jvolgeores.2005.08.002
[9590] SHUKUNO H., TAMURA Y., TANI K., CHANG QING, SUZUKI T., FISKE R. S.: ORIGIN OF SILICIC MAGMAS AND THE COMPOSITIONAL GAP AT SUMISU SUBMARINE CALDERA, IZU-BONIN ARC, JAPAN J. VOLCANOL. GEOTHERM. RES. 156 [2006] 187-216 doi: 10.1016/j.jvolgeores.2006.03.018
[10790] TAMURA Y., TANI K., CHANG QING, SHUKUNO H., KAWABATA H., ISHIZUKA O., FISKE R. S.: WET AND DRY BASALT MAGMA EVOLUTION AT TORISHIMA VOLCANO, IZU-BONIN ARC, JAPAN: THE POSSIBLE ROLE OF PHENGITE IN THE DOWNGOING SLAB J. PETROL. 48 [2007] 1999-2031 GeoReM-id: 3021 doi: 10.1093/petrology/egm048
[11613] TANI K., FISKE R. S., TAMURA Y., KIDO Y., NAKA J., SHUKUNO H., TAKEUCHI R.: SUMISU VOLCANO, IZU-BONIN ARC, JAPAN: SITE OF A SILICIC CALDERA-FORMING ERUPTION FROM A SMALL OPEN-OCEAN ISLAND BULL. VOLCANOL. 70 [2008] 547-562 doi: 10.1007/s00445-007-0153-2
[22607] TAMURA Y., ISHIZUKA O., SATO T., NICHOLS A. R. L.: NISHINOSHIMA VOLCANO IN THE OGASAWARA ARC: NEW CONTINENT FROM THE OCEAN? THE ISLAND ARC 28 (E12285) 2019 doi: 10.1111/iar.12285
[2195] TURNER SIMON P., MCDERMOTT F., HAWKESWORTH C. J., KEPEZHINSKAS P. K.: A U-SERIES STUDY OF LAVAS FROM KAMCHATKA AND THE ALEUTIANS: CONSTRAINTS ON SOURCE COMPOSITION AND MELTING PROCESSES CONTRIB. MINERAL. PETROL. 133 [1998] 217-234 doi: 10.1007/s004100050449
[2475] KEPEZHINSKAS P. K., MCDERMOTT F., DEFANT M. J., HOCHSTAEDTER A. G., DRUMMOND M. S., HAWKESWORTH C. J., KOLOSKOV A. V., MAURY R. C., BELLON H.: TRACE ELEMENT AND SR-ND-PB ISOTOPIC CONSTRAINTS ON A THREE-COMPONENT MODEL OF KAMCHATKA ARC PETROGENESIS GEOCHIM. COSMOCHIM. ACTA 61 [1997] 577-600 doi: 10.1016/S0016-7037(96)00349-3
[2481] HOCHSTAEDTER A. G., KEPEZHINSKAS P. K., DEFANT M. J.: INSIGHTS INTO THE VOLCANIC ARC MANTLE WEDGE FROM MAGNESIAN LAVAS FROM THE KAMCHATKA ARC J. GEOPHYS. RES. B101 [1996] 697-712 doi: 10.1029/95JB02404
[2536] BAILEY J. C., FROLOVA T. I., BURIKOVA I. A.: MINERALOGY, GEOCHEMISTRY AND PETROGENESIS OF KURILE ISLAND-ARC BASALTS CONTRIB. MINERAL. PETROL. 102 [1989] 265-280 doi: 10.1007/BF00373720
[3043] BAILEY J. C., LARSEN O., FROLOVA T. I.: STRONTIUM ISOTOPE VARIATIONS IN LOWER TERTIARY-QUATERNARY VOLCANIC ROCKS FROM THE KURILE ISLAND ARC CONTRIB. MINERAL. PETROL. 95 [1987] 155-165 doi: 10.1007/BF00381265
[3317] POPOLITOV E. I., VOLYNETS O. N.: [1981] 1-183
[4276] CHURIKOVA T. G., DORENDORF F., BARMAN T. R.: SOURCES AND FLUIDS IN THE MANTLE WEDGE BELOW KAMCHATKA, EVIDENCE FROM ACROSS-ARC GEOCHEMICAL VARIATION J. PETROL. 42 [2001] 1567-1593 doi: 10.1093/petrology/42.8.1567
[4788] DORENDORF F., CHURIKOVA T. G., KOLOSKOV A. V., W÷RNER G.: LATE PLEISTOCENE TO HOLOCENE ACTIVITY AT BAKENING VOLCANO AND SURROUNDING MONOGENETIC CENTERS (KAMCHATKA): VOLCANIC GEOLOGY AND GEOCHEMICAL EVOLUTION J. VOLCANOL. GEOTHERM. RES. 104 [2000] 131-151 doi: 10.1016/S0377-0273(00)00203-1
[7063] M‹NKER C., W÷RNER G., YOGODZINSKI G. M., CHURIKOVA T. G.: BEHAVIOUR OF HIGH FIELD STRENGTH ELEMENTS IN SUBDUCTION ZONES: CONSTRAINTS FROM KAMCHATKA-ALEUTIAN ARC LAVAS EARTH PLANET. SCI. LETT. 224 [2004] 275-293 doi: 10.1016/j.epsl.2004.05.030
[9813] DUGGEN S., PORTNYAGIN M. V., BAKER J. A., ULFBECK D. G., HOERNLE K. A., GARBE-SCH÷NBERG D., GRASSINEAU N.: DRASTIC SHIFT IN LAVA GEOCHEMISTRY IN THE VOLCANIC-FRONT TO REAR-ARC REGION OF THE SOUTHERN KAMCHATKAN SUBDUCTION ZONE: EVIDENCE FOR THE TRANSITION FROM SLAB SURFACE DEHYDRATION TO SEDIMENT MELTING GEOCHIM. COSMOCHIM. ACTA 71 [2007] 452-480 GeoReM-id: 3293 doi: 10.1016/j.gca.2006.09.0…
[10896] TURNER SIMON P., SIMS K. W. W., REAGAN M. K., COOK C.: A 210PB-226RA-230TH-238U STUDY OF KLYUCHEVSKOY AND BEZYMIANNY VOLCANOES, KAMCHATKA GEOCHIM. COSMOCHIM. ACTA 71 [2007] 4771-4785 doi: 10.1016/j.gca.2007.08.006
[10990] OZEROV A. YU., ARISHKIN A.A., KYLE PH., BOGOYAVLENSKAYA G. E., KARPENKO S. F: PETROLOGICAL-GEOCHEMICAL MODEL FOR GENETIC RELATIONSHIPS BETWEEN BASALTIC AND ANDESITIC MAGMATISM OF KLYUCHEVSKOY AND BEZYMYANNYI VOLCANOES, KAMCHATKA PETROLOGY 5 [1997] 550-569
[12904] AUER S., BINDEMAN I. N., WALLACE P. J., PONOMAREVA V. V., PORTNYAGIN M. V.: THE ORIGIN OF HYDROUS, HIGH-D18O VOLUMINOUS VOLCANISM: DIVERSE OXYGEN ISOTOPE VALUES AND HIGH MAGMATIC WATER CONTENTS WITHIN THE VOLCANIC RECORD OF KLYUCHEVSKOY VOLCANO, KAMCHATKA, RUSSIA CONTRIB. MINERAL. PETROL. 157 [2009] 209-230 doi: 10.1007/s00410-008-0330-0
[15259] K÷NIG S., M‹NKER C., HOHL S. V., PAULICK H., BARTH A. R., LAGOS M., PFƒNDER J. A., B‹CHL A.: THE EARTH^S TUNGSTEN BUDGET DURING MANTLE MELTING AND CRUST FORMATION GEOCHIM. COSMOCHIM. ACTA 75 [2011] 2119-2136 GeoReM-id: 5984 doi: 10.1016/j.gca.2011.01.031
[15280] GRIB E. N., LEONOV V. L., PEREPELOV A. B.: THE KARYMSKII VOLCANIC CENTER: VOLCANIC ROCK GEOCHEMISTRY J. VOLCANOL. SEISMOL. 3 [2009] 367-387 doi: 10.1134/S0742046309060013
[15433] GORBACH N. V., PORTNYAGIN M. V.: GEOLOGY AND PETROLOGY OF THE LAVA COMPLEX OF YOUNG SHIVELUCH VOLCANO, KAMCHATKA PETROLOGY 19 [2011] 134-166 doi: 10.1134/S0869591111020068
[15882] PORTNYAGIN M. V., BINDEMAN I. N., HOERNLE K. A., HAUFF F.: GEOCHEMISTRY OF PRIMITIVE LAVAS OF THE CENTRAL KAMCHATKA DEPRESSION: MAGMA GENERATION AT THE EDGE OF THE PACIFIC PLATE EICHELBERGER, J., GORDEEV, E., IZBEKOV, P., KASAHARA, M., LEES, J. (EDS.) | VOLCANISM AND SUBDUCTION: THE KAMCHATKA REGION | AGU WASHINGTON [2007] 199-239 doi: 10.1029/172GM16
[15899] FROLOVA T. I., PLECHOV P. YU., TIKHOMIROV P. L., CHURAKOV S. V.: MELT INCLUSIONS IN MINERALS OF ALLIVALITES OF THE KURIL-KAMCHATKA ISLAND ARC GEOCHEM. INT. 39 [2001] 336-346
[18976] KAYZAR T. M., NELSON B. K., BACHMANN O., BAUER A. M., IZBEKOV P. E.: DECIPHERING PETROGENIC PROCESSES USING PB ISOTOPE RATIOS FROM TIME-SERIES SAMPLES AT BEZYMIANNY AND KLYUCHEVSKOY VOLCANOES, CENTRAL KAMCHATKA DEPRESSION CONTRIB. MINERAL. PETROL. 168 (1067) [2014] doi: 10.1007/s00410-014-1067-6
[19553] PONOMAREVA V. V., PORTNYAGIN M. V., PEVZNER M. M., BLAAUW M., KYLE P. R., DERKACHEV A. N.: TEPHRA FROM ANDESITIC SHIVELUCH VOLCANO, KAMCHATKA, NW PACIFIC: CHRONOLOGY OF EXPLOSIVE ERUPTIONS AND GEOCHEMICAL FINGERPRINTING OF VOLCANIC GLASS INT. J. EARTH SCI. (GEOL. RUNDSCHAU) 104 [2015] 1459-1482 doi: 10.1007/s00531-015-1156-4
[19739] TOLSTYKH M. L., PEVZNER M. M., NAUMOV V. B., BABANSKII A. D., KONONKOVA N. N.: TYPES OF PARENTAL MELTS OF PYROCLASTIC ROCKS OF VARIOUS STRUCTURAL-AGE COMPLEXES OF THE SHIVELUCH VOLCANIC MASSIF, KAMCHATKA: EVIDENCE FROM INCLUSIONS IN MINERALS PETROLOGY 23 [2015] 480-517 doi: 10.1134/S0869591115040050
[20395] GAVRILENKO M. G., OZEROV A. YU., KYLE P. R., CARR M. J., NIKULIN A., VIDITO C., DANYUSHEVSKY L. V.: ABRUPT TRANSITION FROM FRACTIONAL CRYSTALLIZATION TO MAGMA MIXING AT GORELY VOLCANO (KAMCHATKA) AFTER CALDERA COLLAPSE BULL. VOLCANOL. 78 (47) [2016] doi: 10.1007/s00445-016-1038-z
[20793] LIU SHENG-AO, HUANG JIAN, LIU JINGAO, W÷RNER G., YANG WEI, TANG YAN-JIE, CHEN YI, TANG LIMEI, ZHENG JIAN-PING, LI SHYU: COPPER ISOTOPIC COMPOSITION OF THE SILICATE EARTH EARTH PLANET. SCI. LETT. 427 [2015] 95-103 GeoReM-id: 8639 doi: 10.1016/j.epsl.2015.06.061
[truncated: 117 more rows]

## Sheet: G50929
Bowman, E.E., and Ducea, M.N., 2023, Pyroxenite melting at subduction zones: Geology, https://doi.org/10.1130/G50929.1
